# Supplementary material for: Identifying vital spreaders in large-scale networks based on neighbor multilayer contributions
Source: Frontiers journal article supplement (doi:10.3389/fphy.2025.1529904), 2025-01-27
Supplement: Data_Sheet_1.zip [file Data_Sheet_1.zip]

## Sheet: Sheet1
CA-GrQc			CA-HepTh			Deezer-Europe			Email-Enron			Musae-ES			Musae-Facebook			Musae-RU			P2P-Gnutella24			P2P-Gnutella30			Politician			Power			Public-Figure
Cumulative appearance frequency	Rank value	Ranking method	Cumulative appearance frequency	Rank value	Ranking method	Cumulative appearance frequency	Rank value	Ranking method	Cumulative appearance frequency	Rank value	Ranking method	Cumulative appearance frequency	Rank value	Ranking method	Cumulative appearance frequency	Rank value	Ranking method	Cumulative appearance frequency	Rank value	Ranking method	Cumulative appearance frequency	Rank value	Ranking method	Cumulative appearance frequency	Rank value	Ranking method	Cumulative appearance frequency	Rank value	Ranking method	Cumulative appearance frequency	Rank value	Ranking method	Cumulative appearance frequency	Rank value	Ranking method
0	1	BC	0	1	BC	0	1	BC	0	1	BC	0	1	BC	0	1	BC	0	1	BC	0	1	BC	0	1	BC	0	1	BC	0	1	BC	0	1	BC
0	2	BC	0	2	BC	0	2	BC	0	2	BC	0	2	BC	0	2	BC	0	2	BC	0	2	BC	0	2	BC	0	2	BC	0	2	BC	0	2	BC
0.1	3	BC	0	3	BC	0	3	BC	0	3	BC	0.1	3	BC	0	3	BC	0.1	3	BC	0	3	BC	0	3	BC	0.1	3	BC	0.1	3	BC	0	3	BC
0.1	4	BC	0	4	BC	0	4	BC	0	4	BC	0.1	4	BC	0	4	BC	0.1	4	BC	0	4	BC	0	4	BC	0.1	4	BC	0.1	4	BC	0	4	BC
0.1	5	BC	0.1	5	BC	0	5	BC	0	5	BC	0.1	5	BC	0	5	BC	0.1	5	BC	0	5	BC	0	5	BC	0.1	5	BC	0.1	5	BC	0	5	BC
0.1	6	BC	0.1	6	BC	0	6	BC	0	6	BC	0.1	6	BC	0	6	BC	0.1	6	BC	0	6	BC	0	6	BC	0.1	6	BC	0.1	6	BC	0.1	6	BC
0.2	7	BC	0.1	7	BC	0	7	BC	0	7	BC	0.2	7	BC	0	7	BC	0.2	7	BC	0	7	BC	0	7	BC	0.1	7	BC	0.1	7	BC	0.1	7	BC
0.2	8	BC	0.1	8	BC	0	8	BC	0	8	BC	0.2	8	BC	0	8	BC	0.2	8	BC	0	8	BC	0	8	BC	0.1	8	BC	0.2	8	BC	0.1	8	BC
0.2	9	BC	0.1	9	BC	0	9	BC	0	9	BC	0.2	9	BC	0	9	BC	0.2	9	BC	0	9	BC	0	9	BC	0.2	9	BC	0.2	9	BC	0.1	9	BC
0.2	10	BC	0.1	10	BC	0	10	BC	0	10	BC	0.2	10	BC	0	10	BC	0.2	10	BC	0	10	BC	0	10	BC	0.2	10	BC	0.2	10	BC	0.1	10	BC
0.3	11	BC	0.1	11	BC	0	11	BC	0	11	BC	0.2	11	BC	0	11	BC	0.3	11	BC	0	11	BC	0	11	BC	0.2	11	BC	0.2	11	BC	0.1	11	BC
0.3	12	BC	0.1	12	BC	0	12	BC	0	12	BC	0.3	12	BC	0.1	12	BC	0.3	12	BC	0	12	BC	0	12	BC	0.2	12	BC	0.2	12	BC	0.1	12	BC
0.3	13	BC	0.2	13	BC	0	13	BC	0	13	BC	0.3	13	BC	0.1	13	BC	0.3	13	BC	0	13	BC	0	13	BC	0.2	13	BC	0.3	13	BC	0.1	13	BC
0.3	14	BC	0.2	14	BC	0	14	BC	0	14	BC	0.3	14	BC	0.1	14	BC	0.3	14	BC	0.1	14	BC	0	14	BC	0.2	14	BC	0.3	14	BC	0.1	14	BC
0.4	15	BC	0.2	15	BC	0.1	15	BC	0	15	BC	0.3	15	BC	0.1	15	BC	0.3	15	BC	0.1	15	BC	0	15	BC	0.3	15	BC	0.3	15	BC	0.1	15	BC
0.4	16	BC	0.2	16	BC	0.1	16	BC	0	16	BC	0.3	16	BC	0.1	16	BC	0.4	16	BC	0.1	16	BC	0	16	BC	0.3	16	BC	0.3	16	BC	0.1	16	BC
0.4	17	BC	0.2	17	BC	0.1	17	BC	0.1	17	BC	0.4	17	BC	0.1	17	BC	0.4	17	BC	0.1	17	BC	0	17	BC	0.3	17	BC	0.3	17	BC	0.1	17	BC
0.4	18	BC	0.2	18	BC	0.1	18	BC	0.1	18	BC	0.4	18	BC	0.1	18	BC	0.4	18	BC	0.1	18	BC	0	18	BC	0.3	18	BC	0.4	18	BC	0.2	18	BC
0.5	19	BC	0.2	19	BC	0.1	19	BC	0.1	19	BC	0.4	19	BC	0.1	19	BC	0.4	19	BC	0.1	19	BC	0.1	19	BC	0.3	19	BC	0.4	19	BC	0.2	19	BC
0.5	20	BC	0.2	20	BC	0.1	20	BC	0.1	20	BC	0.4	20	BC	0.1	20	BC	0.5	20	BC	0.1	20	BC	0.1	20	BC	0.3	20	BC	0.4	20	BC	0.2	20	BC
0.5	21	BC	0.3	21	BC	0.1	21	BC	0.1	21	BC	0.5	21	BC	0.1	21	BC	0.5	21	BC	0.1	21	BC	0.1	21	BC	0.4	21	BC	0.4	21	BC	0.2	21	BC
0.5	22	BC	0.3	22	BC	0.1	22	BC	0.1	22	BC	0.5	22	BC	0.1	22	BC	0.5	22	BC	0.1	22	BC	0.1	22	BC	0.4	22	BC	0.4	22	BC	0.2	22	BC
0.6	23	BC	0.3	23	BC	0.1	23	BC	0.1	23	BC	0.5	23	BC	0.1	23	BC	0.5	23	BC	0.1	23	BC	0.1	23	BC	0.4	23	BC	0.5	23	BC	0.2	23	BC
0.6	24	BC	0.3	24	BC	0.1	24	BC	0.1	24	BC	0.5	24	BC	0.1	24	BC	0.5	24	BC	0.1	24	BC	0.1	24	BC	0.4	24	BC	0.5	24	BC	0.2	24	BC
0.6	25	BC	0.3	25	BC	0.1	25	BC	0.1	25	BC	0.5	25	BC	0.1	25	BC	0.6	25	BC	0.1	25	BC	0.1	25	BC	0.4	25	BC	0.5	25	BC	0.2	25	BC
0.6	26	BC	0.3	26	BC	0.1	26	BC	0.1	26	BC	0.6	26	BC	0.1	26	BC	0.6	26	BC	0.1	26	BC	0.1	26	BC	0.4	26	BC	0.5	26	BC	0.2	26	BC
0.6	27	BC	0.3	27	BC	0.1	27	BC	0.1	27	BC	0.6	27	BC	0.1	27	BC	0.6	27	BC	0.1	27	BC	0.1	27	BC	0.5	27	BC	0.5	27	BC	0.2	27	BC
0.7	28	BC	0.3	28	BC	0.1	28	BC	0.1	28	BC	0.6	28	BC	0.1	28	BC	0.6	28	BC	0.1	28	BC	0.1	28	BC	0.5	28	BC	0.6	28	BC	0.2	28	BC
0.7	29	BC	0.3	29	BC	0.1	29	BC	0.1	29	BC	0.6	29	BC	0.1	29	BC	0.7	29	BC	0.1	29	BC	0.1	29	BC	0.5	29	BC	0.6	29	BC	0.3	29	BC
0.7	30	BC	0.4	30	BC	0.1	30	BC	0.1	30	BC	0.6	30	BC	0.1	30	BC	0.7	30	BC	0.1	30	BC	0.1	30	BC	0.5	30	BC	0.6	30	BC	0.3	30	BC
0.7	31	BC	0.4	31	BC	0.1	31	BC	0.1	31	BC	0.7	31	BC	0.1	31	BC	0.7	31	BC	0.1	31	BC	0.1	31	BC	0.5	31	BC	0.6	31	BC	0.3	31	BC
0.8	32	BC	0.4	32	BC	0.1	32	BC	0.1	32	BC	0.7	32	BC	0.1	32	BC	0.7	32	BC	0.1	32	BC	0.1	32	BC	0.5	32	BC	0.6	32	BC	0.3	32	BC
0.8	33	BC	0.4	33	BC	0.1	33	BC	0.1	33	BC	0.7	33	BC	0.1	33	BC	0.8	33	BC	0.1	33	BC	0.1	33	BC	0.6	33	BC	0.7	33	BC	0.3	33	BC
0.8	34	BC	0.4	34	BC	0.1	34	BC	0.1	34	BC	0.7	34	BC	0.2	34	BC	0.8	34	BC	0.1	34	BC	0.1	34	BC	0.6	34	BC	0.7	34	BC	0.3	34	BC
0.8	35	BC	0.4	35	BC	0.1	35	BC	0.1	35	BC	0.8	35	BC	0.2	35	BC	0.8	35	BC	0.1	35	BC	0.1	35	BC	0.6	35	BC	0.7	35	BC	0.3	35	BC
0.9	36	BC	0.4	36	BC	0.1	36	BC	0.1	36	BC	0.8	36	BC	0.2	36	BC	0.8	36	BC	0.1	36	BC	0.1	36	BC	0.6	36	BC	0.7	36	BC	0.3	36	BC
0.9	37	BC	0.4	37	BC	0.1	37	BC	0.1	37	BC	0.8	37	BC	0.2	37	BC	0.8	37	BC	0.1	37	BC	0.1	37	BC	0.6	37	BC	0.7	37	BC	0.3	37	BC
0.9	38	BC	0.5	38	BC	0.1	38	BC	0.1	38	BC	0.8	38	BC	0.2	38	BC	0.9	38	BC	0.1	38	BC	0.1	38	BC	0.6	38	BC	0.8	38	BC	0.3	38	BC
0.9	39	BC	0.5	39	BC	0.1	39	BC	0.1	39	BC	0.8	39	BC	0.2	39	BC	0.9	39	BC	0.1	39	BC	0.1	39	BC	0.7	39	BC	0.8	39	BC	0.3	39	BC
1	40	BC	0.5	40	BC	0.1	40	BC	0.1	40	BC	0.9	40	BC	0.2	40	BC	0.9	40	BC	0.2	40	BC	0.1	40	BC	0.7	40	BC	0.8	40	BC	0.3	40	BC
1	41	BC	0.5	41	BC	0.1	41	BC	0.1	41	BC	0.9	41	BC	0.2	41	BC	0.9	41	BC	0.2	41	BC	0.1	41	BC	0.7	41	BC	0.8	41	BC	0.4	41	BC
1	42	BC	0.5	42	BC	0.1	42	BC	0.1	42	BC	0.9	42	BC	0.2	42	BC	1	42	BC	0.2	42	BC	0.1	42	BC	0.7	42	BC	0.9	42	BC	0.4	42	BC
1	43	BC	0.5	43	BC	0.2	43	BC	0.1	43	BC	0.9	43	BC	0.2	43	BC	1	43	BC	0.2	43	BC	0.1	43	BC	0.7	43	BC	0.9	43	BC	0.4	43	BC
1.1	44	BC	0.5	44	BC	0.2	44	BC	0.1	44	BC	0.9	44	BC	0.2	44	BC	1	44	BC	0.2	44	BC	0.1	44	BC	0.7	44	BC	0.9	44	BC	0.4	44	BC
1.1	45	BC	0.5	45	BC	0.2	45	BC	0.1	45	BC	1	45	BC	0.2	45	BC	1	45	BC	0.2	45	BC	0.1	45	BC	0.8	45	BC	0.9	45	BC	0.4	45	BC
1.1	46	BC	0.5	46	BC	0.2	46	BC	0.1	46	BC	1	46	BC	0.2	46	BC	1.1	46	BC	0.2	46	BC	0.1	46	BC	0.8	46	BC	0.9	46	BC	0.4	46	BC
1.1	47	BC	0.6	47	BC	0.2	47	BC	0.1	47	BC	1	47	BC	0.2	47	BC	1.1	47	BC	0.2	47	BC	0.1	47	BC	0.8	47	BC	1	47	BC	0.4	47	BC
1.2	48	BC	0.6	48	BC	0.2	48	BC	0.1	48	BC	1	48	BC	0.2	48	BC	1.1	48	BC	0.2	48	BC	0.1	48	BC	0.8	48	BC	1	48	BC	0.4	48	BC
1.2	49	BC	0.6	49	BC	0.2	49	BC	0.1	49	BC	1.1	49	BC	0.2	49	BC	1.1	49	BC	0.2	49	BC	0.1	49	BC	0.8	49	BC	1	49	BC	0.4	49	BC
1.2	50	BC	0.6	50	BC	0.2	50	BC	0.1	50	BC	1.1	50	BC	0.2	50	BC	1.2	50	BC	0.2	50	BC	0.1	50	BC	0.8	50	BC	1	50	BC	0.4	50	BC
1.2	51	BC	0.6	51	BC	0.2	51	BC	0.2	51	BC	1.1	51	BC	0.2	51	BC	1.2	51	BC	0.2	51	BC	0.1	51	BC	0.9	51	BC	1	51	BC	0.4	51	BC
1.3	52	BC	0.6	52	BC	0.2	52	BC	0.2	52	BC	1.1	52	BC	0.2	52	BC	1.2	52	BC	0.2	52	BC	0.1	52	BC	0.9	52	BC	1.1	52	BC	0.4	52	BC
1.3	53	BC	0.6	53	BC	0.2	53	BC	0.2	53	BC	1.1	53	BC	0.2	53	BC	1.2	53	BC	0.2	53	BC	0.1	53	BC	0.9	53	BC	1.1	53	BC	0.5	53	BC
1.3	54	BC	0.6	54	BC	0.2	54	BC	0.2	54	BC	1.2	54	BC	0.2	54	BC	1.3	54	BC	0.2	54	BC	0.2	54	BC	0.9	54	BC	1.1	54	BC	0.5	54	BC
1.3	55	BC	0.6	55	BC	0.2	55	BC	0.2	55	BC	1.2	55	BC	0.2	55	BC	1.3	55	BC	0.2	55	BC	0.2	55	BC	0.9	55	BC	1.1	55	BC	0.5	55	BC
1.3	56	BC	0.7	56	BC	0.2	56	BC	0.2	56	BC	1.2	56	BC	0.3	56	BC	1.3	56	BC	0.2	56	BC	0.2	56	BC	0.9	56	BC	1.1	56	BC	0.5	56	BC
1.4	57	BC	0.7	57	BC	0.2	57	BC	0.2	57	BC	1.2	57	BC	0.3	57	BC	1.3	57	BC	0.2	57	BC	0.2	57	BC	1	57	BC	1.2	57	BC	0.5	57	BC
1.4	58	BC	0.7	58	BC	0.2	58	BC	0.2	58	BC	1.2	58	BC	0.3	58	BC	1.3	58	BC	0.2	58	BC	0.2	58	BC	1	58	BC	1.2	58	BC	0.5	58	BC
1.4	59	BC	0.7	59	BC	0.2	59	BC	0.2	59	BC	1.3	59	BC	0.3	59	BC	1.4	59	BC	0.2	59	BC	0.2	59	BC	1	59	BC	1.2	59	BC	0.5	59	BC
1.4	60	BC	0.7	60	BC	0.2	60	BC	0.2	60	BC	1.3	60	BC	0.3	60	BC	1.4	60	BC	0.2	60	BC	0.2	60	BC	1	60	BC	1.2	60	BC	0.5	60	BC
1.5	61	BC	0.7	61	BC	0.2	61	BC	0.2	61	BC	1.3	61	BC	0.3	61	BC	1.4	61	BC	0.2	61	BC	0.2	61	BC	1	61	BC	1.2	61	BC	0.5	61	BC
1.5	62	BC	0.7	62	BC	0.2	62	BC	0.2	62	BC	1.3	62	BC	0.3	62	BC	1.4	62	BC	0.2	62	BC	0.2	62	BC	1	62	BC	1.3	62	BC	0.5	62	BC
1.5	63	BC	0.7	63	BC	0.2	63	BC	0.2	63	BC	1.4	63	BC	0.3	63	BC	1.5	63	BC	0.2	63	BC	0.2	63	BC	1.1	63	BC	1.3	63	BC	0.5	63	BC
1.5	64	BC	0.8	64	BC	0.2	64	BC	0.2	64	BC	1.4	64	BC	0.3	64	BC	1.5	64	BC	0.2	64	BC	0.2	64	BC	1.1	64	BC	1.3	64	BC	0.6	64	BC
1.6	65	BC	0.8	65	BC	0.2	65	BC	0.2	65	BC	1.4	65	BC	0.3	65	BC	1.5	65	BC	0.3	65	BC	0.2	65	BC	1.1	65	BC	1.3	65	BC	0.6	65	BC
1.6	66	BC	0.8	66	BC	0.2	66	BC	0.2	66	BC	1.4	66	BC	0.3	66	BC	1.5	66	BC	0.3	66	BC	0.2	66	BC	1.1	66	BC	1.3	66	BC	0.6	66	BC
1.6	67	BC	0.8	67	BC	0.2	67	BC	0.2	67	BC	1.5	67	BC	0.3	67	BC	1.6	67	BC	0.3	67	BC	0.2	67	BC	1.1	67	BC	1.4	67	BC	0.6	67	BC
1.6	68	BC	0.8	68	BC	0.2	68	BC	0.2	68	BC	1.5	68	BC	0.3	68	BC	1.6	68	BC	0.3	68	BC	0.2	68	BC	1.2	68	BC	1.4	68	BC	0.6	68	BC
1.7	69	BC	0.8	69	BC	0.2	69	BC	0.2	69	BC	1.5	69	BC	0.3	69	BC	1.6	69	BC	0.3	69	BC	0.2	69	BC	1.2	69	BC	1.4	69	BC	0.6	69	BC
1.7	70	BC	0.8	70	BC	0.2	70	BC	0.2	70	BC	1.5	70	BC	0.3	70	BC	1.6	70	BC	0.3	70	BC	0.2	70	BC	1.2	70	BC	1.4	70	BC	0.6	70	BC
1.7	71	BC	0.8	71	BC	0.3	71	BC	0.2	71	BC	1.5	71	BC	0.3	71	BC	1.6	71	BC	0.3	71	BC	0.2	71	BC	1.2	71	BC	1.4	71	BC	0.6	71	BC
1.7	72	BC	0.8	72	BC	0.3	72	BC	0.2	72	BC	1.6	72	BC	0.3	72	BC	1.7	72	BC	0.3	72	BC	0.2	72	BC	1.2	72	BC	1.5	72	BC	0.6	72	BC
1.8	73	BC	0.9	73	BC	0.3	73	BC	0.2	73	BC	1.6	73	BC	0.3	73	BC	1.7	73	BC	0.3	73	BC	0.2	73	BC	1.2	73	BC	1.5	73	BC	0.6	73	BC
1.8	74	BC	0.9	74	BC	0.3	74	BC	0.2	74	BC	1.6	74	BC	0.3	74	BC	1.7	74	BC	0.3	74	BC	0.2	74	BC	1.3	74	BC	1.5	74	BC	0.6	74	BC
1.8	75	BC	0.9	75	BC	0.3	75	BC	0.2	75	BC	1.6	75	BC	0.3	75	BC	1.8	75	BC	0.3	75	BC	0.2	75	BC	1.3	75	BC	1.5	75	BC	0.6	75	BC
1.8	76	BC	0.9	76	BC	0.3	76	BC	0.2	76	BC	1.7	76	BC	0.3	76	BC	1.8	76	BC	0.3	76	BC	0.2	76	BC	1.3	76	BC	1.5	76	BC	0.7	76	BC
1.9	77	BC	0.9	77	BC	0.3	77	BC	0.2	77	BC	1.7	77	BC	0.3	77	BC	1.8	77	BC	0.3	77	BC	0.2	77	BC	1.3	77	BC	1.6	77	BC	0.7	77	BC
1.9	78	BC	0.9	78	BC	0.3	78	BC	0.2	78	BC	1.7	78	BC	0.4	78	BC	1.8	78	BC	0.3	78	BC	0.2	78	BC	1.3	78	BC	1.6	78	BC	0.7	78	BC
1.9	79	BC	0.9	79	BC	0.3	79	BC	0.2	79	BC	1.7	79	BC	0.4	79	BC	1.8	79	BC	0.3	79	BC	0.2	79	BC	1.3	79	BC	1.6	79	BC	0.7	79	BC
1.9	80	BC	0.9	80	BC	0.3	80	BC	0.2	80	BC	1.7	80	BC	0.4	80	BC	1.9	80	BC	0.3	80	BC	0.2	80	BC	1.4	80	BC	1.6	80	BC	0.7	80	BC
1.9	81	BC	0.9	81	BC	0.3	81	BC	0.2	81	BC	1.8	81	BC	0.4	81	BC	1.9	81	BC	0.3	81	BC	0.2	81	BC	1.4	81	BC	1.6	81	BC	0.7	81	BC
2	82	BC	1	82	BC	0.3	82	BC	0.2	82	BC	1.8	82	BC	0.4	82	BC	1.9	82	BC	0.3	82	BC	0.2	82	BC	1.4	82	BC	1.7	82	BC	0.7	82	BC
2	83	BC	1	83	BC	0.3	83	BC	0.2	83	BC	1.8	83	BC	0.4	83	BC	1.9	83	BC	0.3	83	BC	0.2	83	BC	1.4	83	BC	1.7	83	BC	0.7	83	BC
2	84	BC	1	84	BC	0.3	84	BC	0.2	84	BC	1.8	84	BC	0.4	84	BC	2	84	BC	0.3	84	BC	0.2	84	BC	1.4	84	BC	1.7	84	BC	0.7	84	BC
2	85	BC	1	85	BC	0.3	85	BC	0.3	85	BC	1.9	85	BC	0.4	85	BC	2	85	BC	0.3	85	BC	0.2	85	BC	1.4	85	BC	1.7	85	BC	0.7	85	BC
2.1	86	BC	1	86	BC	0.3	86	BC	0.3	86	BC	1.9	86	BC	0.4	86	BC	2	86	BC	0.3	86	BC	0.2	86	BC	1.5	86	BC	1.7	86	BC	0.7	86	BC
2.1	87	BC	1	87	BC	0.3	87	BC	0.3	87	BC	1.9	87	BC	0.4	87	BC	2	87	BC	0.3	87	BC	0.2	87	BC	1.5	87	BC	1.8	87	BC	0.8	87	BC
2.1	88	BC	1	88	BC	0.3	88	BC	0.3	88	BC	1.9	88	BC	0.4	88	BC	2.1	88	BC	0.4	88	BC	0.2	88	BC	1.5	88	BC	1.8	88	BC	0.8	88	BC
2.1	89	BC	1	89	BC	0.3	89	BC	0.3	89	BC	1.9	89	BC	0.4	89	BC	2.1	89	BC	0.4	89	BC	0.2	89	BC	1.5	89	BC	1.8	89	BC	0.8	89	BC
2.2	90	BC	1.1	90	BC	0.3	90	BC	0.3	90	BC	2	90	BC	0.4	90	BC	2.1	90	BC	0.4	90	BC	0.3	90	BC	1.5	90	BC	1.8	90	BC	0.8	90	BC
2.2	91	BC	1.1	91	BC	0.3	91	BC	0.3	91	BC	2	91	BC	0.4	91	BC	2.1	91	BC	0.4	91	BC	0.3	91	BC	1.5	91	BC	1.8	91	BC	0.8	91	BC
2.2	92	BC	1.1	92	BC	0.3	92	BC	0.3	92	BC	2	92	BC	0.4	92	BC	2.1	92	BC	0.4	92	BC	0.3	92	BC	1.6	92	BC	1.9	92	BC	0.8	92	BC
2.2	93	BC	1.1	93	BC	0.3	93	BC	0.3	93	BC	2	93	BC	0.4	93	BC	2.2	93	BC	0.4	93	BC	0.3	93	BC	1.6	93	BC	1.9	93	BC	0.8	93	BC
2.3	94	BC	1.1	94	BC	0.3	94	BC	0.3	94	BC	2	94	BC	0.4	94	BC	2.2	94	BC	0.4	94	BC	0.3	94	BC	1.6	94	BC	1.9	94	BC	0.8	94	BC
2.3	95	BC	1.1	95	BC	0.3	95	BC	0.3	95	BC	2.1	95	BC	0.4	95	BC	2.2	95	BC	0.4	95	BC	0.3	95	BC	1.6	95	BC	1.9	95	BC	0.8	95	BC
2.3	96	BC	1.1	96	BC	0.3	96	BC	0.3	96	BC	2.1	96	BC	0.4	96	BC	2.2	96	BC	0.4	96	BC	0.3	96	BC	1.6	96	BC	1.9	96	BC	0.8	96	BC
2.3	97	BC	1.1	97	BC	0.3	97	BC	0.3	97	BC	2.1	97	BC	0.4	97	BC	2.3	97	BC	0.4	97	BC	0.3	97	BC	1.6	97	BC	2	97	BC	0.8	97	BC
2.4	98	BC	1.1	98	BC	0.3	98	BC	0.3	98	BC	2.1	98	BC	0.4	98	BC	2.3	98	BC	0.4	98	BC	0.3	98	BC	1.7	98	BC	2	98	BC	0.8	98	BC
2.4	99	BC	1.2	99	BC	0.4	99	BC	0.3	99	BC	2.2	99	BC	0.4	99	BC	2.3	99	BC	0.4	99	BC	0.3	99	BC	1.7	99	BC	2	99	BC	0.9	99	BC
2.4	100	BC	1.2	100	BC	0.4	100	BC	0.3	100	BC	2.2	100	BC	0.4	100	BC	2.3	100	BC	0.4	100	BC	0.3	100	BC	1.7	100	BC	2	100	BC	0.9	100	BC
2.4	101	BC	1.2	101	BC	0.4	101	BC	0.3	101	BC	2.2	101	BC	0.5	101	BC	2.3	101	BC	0.4	101	BC	0.3	101	BC	1.7	101	BC	2	101	BC	0.9	101	BC
2.5	102	BC	1.2	102	BC	0.4	102	BC	0.3	102	BC	2.2	102	BC	0.5	102	BC	2.4	102	BC	0.4	102	BC	0.3	102	BC	1.7	102	BC	2.1	102	BC	0.9	102	BC
2.5	103	BC	1.2	103	BC	0.4	103	BC	0.3	103	BC	2.2	103	BC	0.5	103	BC	2.4	103	BC	0.4	103	BC	0.3	103	BC	1.7	103	BC	2.1	103	BC	0.9	103	BC
2.5	104	BC	1.2	104	BC	0.4	104	BC	0.3	104	BC	2.3	104	BC	0.5	104	BC	2.4	104	BC	0.4	104	BC	0.3	104	BC	1.8	104	BC	2.1	104	BC	0.9	104	BC
2.5	105	BC	1.2	105	BC	0.4	105	BC	0.3	105	BC	2.3	105	BC	0.5	105	BC	2.4	105	BC	0.4	105	BC	0.3	105	BC	1.8	105	BC	2.1	105	BC	0.9	105	BC
2.5	106	BC	1.2	106	BC	0.4	106	BC	0.3	106	BC	2.3	106	BC	0.5	106	BC	2.5	106	BC	0.4	106	BC	0.3	106	BC	1.8	106	BC	2.1	106	BC	0.9	106	BC
2.6	107	BC	1.3	107	BC	0.4	107	BC	0.3	107	BC	2.3	107	BC	0.5	107	BC	2.5	107	BC	0.4	107	BC	0.3	107	BC	1.8	107	BC	2.2	107	BC	0.9	107	BC
2.6	108	BC	1.3	108	BC	0.4	108	BC	0.3	108	BC	2.3	108	BC	0.5	108	BC	2.5	108	BC	0.4	108	BC	0.3	108	BC	1.8	108	BC	2.2	108	BC	0.9	108	BC
2.6	109	BC	1.3	109	BC	0.4	109	BC	0.3	109	BC	2.4	109	BC	0.5	109	BC	2.5	109	BC	0.4	109	BC	0.3	109	BC	1.8	109	BC	2.2	109	BC	0.9	109	BC
2.6	110	BC	1.3	110	BC	0.4	110	BC	0.3	110	BC	2.4	110	BC	0.5	110	BC	2.6	110	BC	0.4	110	BC	0.3	110	BC	1.9	110	BC	2.2	110	BC	1	110	BC
2.7	111	BC	1.3	111	BC	0.4	111	BC	0.3	111	BC	2.4	111	BC	0.5	111	BC	2.6	111	BC	0.4	111	BC	0.3	111	BC	1.9	111	BC	2.2	111	BC	1	111	BC
2.7	112	BC	1.3	112	BC	0.4	112	BC	0.3	112	BC	2.4	112	BC	0.5	112	BC	2.6	112	BC	0.4	112	BC	0.3	112	BC	1.9	112	BC	2.3	112	BC	1	112	BC
2.7	113	BC	1.3	113	BC	0.4	113	BC	0.3	113	BC	2.5	113	BC	0.5	113	BC	2.7	113	BC	0.4	113	BC	0.3	113	BC	1.9	113	BC	2.3	113	BC	1	113	BC
2.7	114	BC	1.3	114	BC	0.4	114	BC	0.3	114	BC	2.5	114	BC	0.5	114	BC	2.7	114	BC	0.5	114	BC	0.3	114	BC	1.9	114	BC	2.3	114	BC	1	114	BC
2.8	115	BC	1.3	115	BC	0.4	115	BC	0.3	115	BC	2.5	115	BC	0.5	115	BC	2.7	115	BC	0.5	115	BC	0.3	115	BC	2	115	BC	2.3	115	BC	1	115	BC
2.8	116	BC	1.4	116	BC	0.4	116	BC	0.3	116	BC	2.5	116	BC	0.5	116	BC	2.8	116	BC	0.5	116	BC	0.3	116	BC	2	116	BC	2.3	116	BC	1	116	BC
2.8	117	BC	1.4	117	BC	0.4	117	BC	0.3	117	BC	2.5	117	BC	0.5	117	BC	2.8	117	BC	0.5	117	BC	0.3	117	BC	2	117	BC	2.4	117	BC	1	117	BC
2.8	118	BC	1.4	118	BC	0.4	118	BC	0.4	118	BC	2.6	118	BC	0.5	118	BC	2.8	118	BC	0.5	118	BC	0.3	118	BC	2	118	BC	2.4	118	BC	1	118	BC
2.9	119	BC	1.4	119	BC	0.4	119	BC	0.4	119	BC	2.6	119	BC	0.5	119	BC	2.8	119	BC	0.5	119	BC	0.3	119	BC	2	119	BC	2.4	119	BC	1	119	BC
2.9	120	BC	1.4	120	BC	0.4	120	BC	0.4	120	BC	2.6	120	BC	0.5	120	BC	2.9	120	BC	0.5	120	BC	0.3	120	BC	2	120	BC	2.4	120	BC	1	120	BC
2.9	121	BC	1.4	121	BC	0.4	121	BC	0.4	121	BC	2.6	121	BC	0.5	121	BC	2.9	121	BC	0.5	121	BC	0.3	121	BC	2.1	121	BC	2.4	121	BC	1	121	BC
2.9	122	BC	1.4	122	BC	0.4	122	BC	0.4	122	BC	2.6	122	BC	0.6	122	BC	2.9	122	BC	0.5	122	BC	0.3	122	BC	2.1	122	BC	2.5	122	BC	1.1	122	BC
3	123	BC	1.4	123	BC	0.4	123	BC	0.4	123	BC	2.7	123	BC	0.6	123	BC	2.9	123	BC	0.5	123	BC	0.3	123	BC	2.1	123	BC	2.5	123	BC	1.1	123	BC
3	124	BC	1.4	124	BC	0.4	124	BC	0.4	124	BC	2.7	124	BC	0.6	124	BC	2.9	124	BC	0.5	124	BC	0.4	124	BC	2.1	124	BC	2.5	124	BC	1.1	124	BC
3	125	BC	1.5	125	BC	0.4	125	BC	0.4	125	BC	2.7	125	BC	0.6	125	BC	3	125	BC	0.5	125	BC	0.4	125	BC	2.1	125	BC	2.5	125	BC	1.1	125	BC
3	126	BC	1.5	126	BC	0.5	126	BC	0.4	126	BC	2.8	126	BC	0.6	126	BC	3	126	BC	0.5	126	BC	0.4	126	BC	2.1	126	BC	2.6	126	BC	1.1	126	BC
3.1	127	BC	1.5	127	BC	0.5	127	BC	0.4	127	BC	2.8	127	BC	0.6	127	BC	3	127	BC	0.5	127	BC	0.4	127	BC	2.2	127	BC	2.6	127	BC	1.1	127	BC
3.1	128	BC	1.5	128	BC	0.5	128	BC	0.4	128	BC	2.8	128	BC	0.6	128	BC	3	128	BC	0.5	128	BC	0.4	128	BC	2.2	128	BC	2.6	128	BC	1.1	128	BC
3.1	129	BC	1.5	129	BC	0.5	129	BC	0.4	129	BC	2.8	129	BC	0.6	129	BC	3.1	129	BC	0.5	129	BC	0.4	129	BC	2.2	129	BC	2.6	129	BC	1.1	129	BC
3.1	130	BC	1.5	130	BC	0.5	130	BC	0.4	130	BC	2.8	130	BC	0.6	130	BC	3.1	130	BC	0.5	130	BC	0.4	130	BC	2.2	130	BC	2.6	130	BC	1.1	130	BC
3.2	131	BC	1.5	131	BC	0.5	131	BC	0.4	131	BC	2.9	131	BC	0.6	131	BC	3.1	131	BC	0.5	131	BC	0.4	131	BC	2.2	131	BC	2.7	131	BC	1.1	131	BC
3.2	132	BC	1.5	132	BC	0.5	132	BC	0.4	132	BC	2.9	132	BC	0.6	132	BC	3.1	132	BC	0.5	132	BC	0.4	132	BC	2.3	132	BC	2.7	132	BC	1.1	132	BC
3.2	133	BC	1.6	133	BC	0.5	133	BC	0.4	133	BC	2.9	133	BC	0.6	133	BC	3.1	133	BC	0.5	133	BC	0.4	133	BC	2.3	133	BC	2.7	133	BC	1.2	133	BC
3.2	134	BC	1.6	134	BC	0.5	134	BC	0.4	134	BC	2.9	134	BC	0.6	134	BC	3.2	134	BC	0.5	134	BC	0.4	134	BC	2.3	134	BC	2.7	134	BC	1.2	134	BC
3.2	135	BC	1.6	135	BC	0.5	135	BC	0.4	135	BC	2.9	135	BC	0.6	135	BC	3.2	135	BC	0.5	135	BC	0.4	135	BC	2.3	135	BC	2.7	135	BC	1.2	135	BC
3.3	136	BC	1.6	136	BC	0.5	136	BC	0.4	136	BC	3	136	BC	0.6	136	BC	3.2	136	BC	0.5	136	BC	0.4	136	BC	2.3	136	BC	2.8	136	BC	1.2	136	BC
3.3	137	BC	1.6	137	BC	0.5	137	BC	0.4	137	BC	3	137	BC	0.6	137	BC	3.2	137	BC	0.6	137	BC	0.4	137	BC	2.3	137	BC	2.8	137	BC	1.2	137	BC
3.3	138	BC	1.6	138	BC	0.5	138	BC	0.4	138	BC	3	138	BC	0.6	138	BC	3.3	138	BC	0.6	138	BC	0.4	138	BC	2.4	138	BC	2.8	138	BC	1.2	138	BC
3.3	139	BC	1.6	139	BC	0.5	139	BC	0.4	139	BC	3	139	BC	0.6	139	BC	3.3	139	BC	0.6	139	BC	0.4	139	BC	2.4	139	BC	2.8	139	BC	1.2	139	BC
3.4	140	BC	1.6	140	BC	0.5	140	BC	0.4	140	BC	3.1	140	BC	0.6	140	BC	3.3	140	BC	0.6	140	BC	0.4	140	BC	2.4	140	BC	2.8	140	BC	1.2	140	BC
3.4	141	BC	1.7	141	BC	0.5	141	BC	0.4	141	BC	3.1	141	BC	0.6	141	BC	3.3	141	BC	0.6	141	BC	0.4	141	BC	2.4	141	BC	2.9	141	BC	1.2	141	BC
3.4	142	BC	1.7	142	BC	0.5	142	BC	0.4	142	BC	3.1	142	BC	0.6	142	BC	3.4	142	BC	0.6	142	BC	0.4	142	BC	2.4	142	BC	2.9	142	BC	1.2	142	BC
3.4	143	BC	1.7	143	BC	0.5	143	BC	0.4	143	BC	3.1	143	BC	0.6	143	BC	3.4	143	BC	0.6	143	BC	0.4	143	BC	2.5	143	BC	2.9	143	BC	1.2	143	BC
3.5	144	BC	1.7	144	BC	0.5	144	BC	0.4	144	BC	3.1	144	BC	0.7	144	BC	3.4	144	BC	0.6	144	BC	0.4	144	BC	2.5	144	BC	2.9	144	BC	1.2	144	BC
3.5	145	BC	1.7	145	BC	0.5	145	BC	0.4	145	BC	3.2	145	BC	0.7	145	BC	3.4	145	BC	0.6	145	BC	0.4	145	BC	2.5	145	BC	2.9	145	BC	1.3	145	BC
3.5	146	BC	1.7	146	BC	0.5	146	BC	0.4	146	BC	3.2	146	BC	0.7	146	BC	3.4	146	BC	0.6	146	BC	0.4	146	BC	2.5	146	BC	3	146	BC	1.3	146	BC
3.5	147	BC	1.7	147	BC	0.5	147	BC	0.4	147	BC	3.2	147	BC	0.7	147	BC	3.5	147	BC	0.6	147	BC	0.4	147	BC	2.5	147	BC	3	147	BC	1.3	147	BC
3.6	148	BC	1.7	148	BC	0.5	148	BC	0.4	148	BC	3.2	148	BC	0.7	148	BC	3.5	148	BC	0.6	148	BC	0.4	148	BC	2.5	148	BC	3	148	BC	1.3	148	BC
3.6	149	BC	1.7	149	BC	0.5	149	BC	0.4	149	BC	3.2	149	BC	0.7	149	BC	3.5	149	BC	0.6	149	BC	0.4	149	BC	2.6	149	BC	3	149	BC	1.3	149	BC
3.6	150	BC	1.8	150	BC	0.5	150	BC	0.4	150	BC	3.3	150	BC	0.7	150	BC	3.5	150	BC	0.6	150	BC	0.5	150	BC	2.6	150	BC	3	150	BC	1.3	150	BC
3.6	151	BC	1.8	151	BC	0.5	151	BC	0.4	151	BC	3.3	151	BC	0.7	151	BC	3.6	151	BC	0.6	151	BC	0.5	151	BC	2.6	151	BC	3.1	151	BC	1.3	151	BC
3.7	152	BC	1.8	152	BC	0.5	152	BC	0.5	152	BC	3.3	152	BC	0.7	152	BC	3.6	152	BC	0.6	152	BC	0.5	152	BC	2.6	152	BC	3.1	152	BC	1.3	152	BC
3.7	153	BC	1.8	153	BC	0.6	153	BC	0.5	153	BC	3.3	153	BC	0.7	153	BC	3.6	153	BC	0.6	153	BC	0.5	153	BC	2.6	153	BC	3.1	153	BC	1.3	153	BC
3.7	154	BC	1.8	154	BC	0.6	154	BC	0.5	154	BC	3.4	154	BC	0.7	154	BC	3.6	154	BC	0.6	154	BC	0.5	154	BC	2.6	154	BC	3.1	154	BC	1.3	154	BC
3.7	155	BC	1.8	155	BC	0.6	155	BC	0.5	155	BC	3.4	155	BC	0.7	155	BC	3.6	155	BC	0.6	155	BC	0.5	155	BC	2.7	155	BC	3.1	155	BC	1.3	155	BC
3.8	156	BC	1.8	156	BC	0.6	156	BC	0.5	156	BC	3.4	156	BC	0.7	156	BC	3.7	156	BC	0.6	156	BC	0.5	156	BC	2.7	156	BC	3.2	156	BC	1.3	156	BC
3.8	157	BC	1.8	157	BC	0.6	157	BC	0.5	157	BC	3.4	157	BC	0.7	157	BC	3.7	157	BC	0.6	157	BC	0.5	157	BC	2.7	157	BC	3.2	157	BC	1.4	157	BC
3.8	158	BC	1.9	158	BC	0.6	158	BC	0.5	158	BC	3.4	158	BC	0.7	158	BC	3.7	158	BC	0.6	158	BC	0.5	158	BC	2.7	158	BC	3.2	158	BC	1.4	158	BC
3.8	159	BC	1.9	159	BC	0.6	159	BC	0.5	159	BC	3.5	159	BC	0.7	159	BC	3.7	159	BC	0.7	159	BC	0.5	159	BC	2.7	159	BC	3.2	159	BC	1.4	159	BC
3.8	160	BC	1.9	160	BC	0.6	160	BC	0.5	160	BC	3.5	160	BC	0.7	160	BC	3.8	160	BC	0.7	160	BC	0.5	160	BC	2.7	160	BC	3.2	160	BC	1.4	160	BC
3.9	161	BC	1.9	161	BC	0.6	161	BC	0.5	161	BC	3.5	161	BC	0.7	161	BC	3.8	161	BC	0.7	161	BC	0.5	161	BC	2.8	161	BC	3.3	161	BC	1.4	161	BC
3.9	162	BC	1.9	162	BC	0.6	162	BC	0.5	162	BC	3.5	162	BC	0.7	162	BC	3.8	162	BC	0.7	162	BC	0.5	162	BC	2.8	162	BC	3.3	162	BC	1.4	162	BC
3.9	163	BC	1.9	163	BC	0.6	163	BC	0.5	163	BC	3.5	163	BC	0.7	163	BC	3.9	163	BC	0.7	163	BC	0.5	163	BC	2.8	163	BC	3.3	163	BC	1.4	163	BC
3.9	164	BC	1.9	164	BC	0.6	164	BC	0.5	164	BC	3.6	164	BC	0.7	164	BC	3.9	164	BC	0.7	164	BC	0.5	164	BC	2.8	164	BC	3.3	164	BC	1.4	164	BC
4	165	BC	1.9	165	BC	0.6	165	BC	0.5	165	BC	3.6	165	BC	0.7	165	BC	3.9	165	BC	0.7	165	BC	0.5	165	BC	2.8	165	BC	3.3	165	BC	1.4	165	BC
4	166	BC	1.9	166	BC	0.6	166	BC	0.5	166	BC	3.6	166	BC	0.8	166	BC	3.9	166	BC	0.7	166	BC	0.5	166	BC	2.8	166	BC	3.4	166	BC	1.4	166	BC
4	167	BC	2	167	BC	0.6	167	BC	0.5	167	BC	3.7	167	BC	0.8	167	BC	3.9	167	BC	0.7	167	BC	0.5	167	BC	2.9	167	BC	3.4	167	BC	1.5	167	BC
4	168	BC	2	168	BC	0.6	168	BC	0.5	168	BC	3.7	168	BC	0.8	168	BC	4	168	BC	0.7	168	BC	0.5	168	BC	2.9	168	BC	3.4	168	BC	1.5	168	BC
4.1	169	BC	2	169	BC	0.6	169	BC	0.5	169	BC	3.7	169	BC	0.8	169	BC	4	169	BC	0.7	169	BC	0.5	169	BC	2.9	169	BC	3.4	169	BC	1.5	169	BC
4.1	170	BC	2	170	BC	0.6	170	BC	0.5	170	BC	3.7	170	BC	0.8	170	BC	4	170	BC	0.7	170	BC	0.5	170	BC	2.9	170	BC	3.4	170	BC	1.5	170	BC
4.1	171	BC	2	171	BC	0.6	171	BC	0.5	171	BC	3.7	171	BC	0.8	171	BC	4	171	BC	0.7	171	BC	0.5	171	BC	2.9	171	BC	3.5	171	BC	1.5	171	BC
4.1	172	BC	2	172	BC	0.6	172	BC	0.5	172	BC	3.8	172	BC	0.8	172	BC	4.1	172	BC	0.7	172	BC	0.5	172	BC	2.9	172	BC	3.5	172	BC	1.5	172	BC
4.2	173	BC	2	173	BC	0.6	173	BC	0.5	173	BC	3.8	173	BC	0.8	173	BC	4.1	173	BC	0.7	173	BC	0.5	173	BC	3	173	BC	3.5	173	BC	1.5	173	BC
4.2	174	BC	2	174	BC	0.6	174	BC	0.5	174	BC	3.8	174	BC	0.8	174	BC	4.1	174	BC	0.7	174	BC	0.5	174	BC	3	174	BC	3.5	174	BC	1.5	174	BC
4.2	175	BC	2	175	BC	0.6	175	BC	0.5	175	BC	3.8	175	BC	0.8	175	BC	4.1	175	BC	0.7	175	BC	0.5	175	BC	3	175	BC	3.5	175	BC	1.5	175	BC
4.2	176	BC	2.1	176	BC	0.6	176	BC	0.5	176	BC	3.9	176	BC	0.8	176	BC	4.2	176	BC	0.7	176	BC	0.5	176	BC	3	176	BC	3.6	176	BC	1.5	176	BC
4.3	177	BC	2.1	177	BC	0.6	177	BC	0.5	177	BC	3.9	177	BC	0.8	177	BC	4.2	177	BC	0.7	177	BC	0.5	177	BC	3	177	BC	3.6	177	BC	1.5	177	BC
4.3	178	BC	2.1	178	BC	0.6	178	BC	0.5	178	BC	3.9	178	BC	0.8	178	BC	4.2	178	BC	0.8	178	BC	0.5	178	BC	3	178	BC	3.6	178	BC	1.5	178	BC
4.3	179	BC	2.1	179	BC	0.6	179	BC	0.5	179	BC	3.9	179	BC	0.8	179	BC	4.2	179	BC	0.8	179	BC	0.5	179	BC	3.1	179	BC	3.6	179	BC	1.6	179	BC
4.3	180	BC	2.1	180	BC	0.7	180	BC	0.5	180	BC	4	180	BC	0.8	180	BC	4.2	180	BC	0.8	180	BC	0.5	180	BC	3.1	180	BC	3.6	180	BC	1.6	180	BC
4.4	181	BC	2.1	181	BC	0.7	181	BC	0.5	181	BC	4	181	BC	0.8	181	BC	4.3	181	BC	0.8	181	BC	0.5	181	BC	3.1	181	BC	3.7	181	BC	1.6	181	BC
4.4	182	BC	2.1	182	BC	0.7	182	BC	0.5	182	BC	4	182	BC	0.8	182	BC	4.3	182	BC	0.8	182	BC	0.6	182	BC	3.1	182	BC	3.7	182	BC	1.6	182	BC
4.4	183	BC	2.1	183	BC	0.7	183	BC	0.6	183	BC	4.1	183	BC	0.8	183	BC	4.3	183	BC	0.8	183	BC	0.6	183	BC	3.1	183	BC	3.7	183	BC	1.6	183	BC
4.4	184	BC	2.2	184	BC	0.7	184	BC	0.6	184	BC	4.1	184	BC	0.8	184	BC	4.4	184	BC	0.8	184	BC	0.6	184	BC	3.1	184	BC	3.7	184	BC	1.6	184	BC
4.4	185	BC	2.2	185	BC	0.7	185	BC	0.6	185	BC	4.1	185	BC	0.9	185	BC	4.4	185	BC	0.8	185	BC	0.6	185	BC	3.2	185	BC	3.7	185	BC	1.6	185	BC
4.5	186	BC	2.2	186	BC	0.7	186	BC	0.6	186	BC	4.1	186	BC	0.9	186	BC	4.4	186	BC	0.8	186	BC	0.6	186	BC	3.2	186	BC	3.8	186	BC	1.6	186	BC
4.5	187	BC	2.2	187	BC	0.7	187	BC	0.6	187	BC	4.2	187	BC	0.9	187	BC	4.4	187	BC	0.8	187	BC	0.6	187	BC	3.2	187	BC	3.8	187	BC	1.6	187	BC
4.5	188	BC	2.2	188	BC	0.7	188	BC	0.6	188	BC	4.2	188	BC	0.9	188	BC	4.5	188	BC	0.8	188	BC	0.6	188	BC	3.2	188	BC	3.8	188	BC	1.6	188	BC
4.5	189	BC	2.2	189	BC	0.7	189	BC	0.6	189	BC	4.2	189	BC	0.9	189	BC	4.5	189	BC	0.8	189	BC	0.6	189	BC	3.2	189	BC	3.8	189	BC	1.7	189	BC
4.6	190	BC	2.2	190	BC	0.7	190	BC	0.6	190	BC	4.2	190	BC	0.9	190	BC	4.5	190	BC	0.8	190	BC	0.6	190	BC	3.2	190	BC	3.8	190	BC	1.7	190	BC
4.6	191	BC	2.2	191	BC	0.7	191	BC	0.6	191	BC	4.2	191	BC	0.9	191	BC	4.5	191	BC	0.8	191	BC	0.6	191	BC	3.3	191	BC	3.9	191	BC	1.7	191	BC
4.6	192	BC	2.2	192	BC	0.7	192	BC	0.6	192	BC	4.3	192	BC	0.9	192	BC	4.6	192	BC	0.8	192	BC	0.6	192	BC	3.3	192	BC	3.9	192	BC	1.7	192	BC
4.6	193	BC	2.3	193	BC	0.7	193	BC	0.6	193	BC	4.3	193	BC	0.9	193	BC	4.6	193	BC	0.8	193	BC	0.6	193	BC	3.3	193	BC	3.9	193	BC	1.7	193	BC
4.7	194	BC	2.3	194	BC	0.7	194	BC	0.6	194	BC	4.3	194	BC	0.9	194	BC	4.6	194	BC	0.8	194	BC	0.6	194	BC	3.3	194	BC	3.9	194	BC	1.7	194	BC
4.7	195	BC	2.3	195	BC	0.7	195	BC	0.6	195	BC	4.3	195	BC	0.9	195	BC	4.6	195	BC	0.8	195	BC	0.6	195	BC	3.3	195	BC	3.9	195	BC	1.7	195	BC
4.7	196	BC	2.3	196	BC	0.7	196	BC	0.6	196	BC	4.3	196	BC	0.9	196	BC	4.7	196	BC	0.8	196	BC	0.6	196	BC	3.4	196	BC	4	196	BC	1.7	196	BC
4.7	197	BC	2.3	197	BC	0.7	197	BC	0.6	197	BC	4.4	197	BC	0.9	197	BC	4.7	197	BC	0.8	197	BC	0.6	197	BC	3.4	197	BC	4	197	BC	1.7	197	BC
4.8	198	BC	2.3	198	BC	0.7	198	BC	0.6	198	BC	4.4	198	BC	0.9	198	BC	4.7	198	BC	0.8	198	BC	0.6	198	BC	3.4	198	BC	4	198	BC	1.7	198	BC
4.8	199	BC	2.3	199	BC	0.7	199	BC	0.6	199	BC	4.4	199	BC	0.9	199	BC	4.7	199	BC	0.8	199	BC	0.6	199	BC	3.4	199	BC	4	199	BC	1.8	199	BC
4.8	200	BC	2.3	200	BC	0.7	200	BC	0.6	200	BC	4.4	200	BC	0.9	200	BC	4.7	200	BC	0.9	200	BC	0.6	200	BC	3.4	200	BC	4	200	BC	1.8	200	BC
4.8	201	BC	2.4	201	BC	0.7	201	BC	0.6	201	BC	4.5	201	BC	0.9	201	BC	4.8	201	BC	0.9	201	BC	0.6	201	BC	3.4	201	BC	4.1	201	BC	1.8	201	BC
4.9	202	BC	2.4	202	BC	0.7	202	BC	0.6	202	BC	4.5	202	BC	0.9	202	BC	4.8	202	BC	0.9	202	BC	0.6	202	BC	3.5	202	BC	4.1	202	BC	1.8	202	BC
4.9	203	BC	2.4	203	BC	0.7	203	BC	0.6	203	BC	4.5	203	BC	0.9	203	BC	4.8	203	BC	0.9	203	BC	0.6	203	BC	3.5	203	BC	4.1	203	BC	1.8	203	BC
4.9	204	BC	2.4	204	BC	0.7	204	BC	0.6	204	BC	4.5	204	BC	0.9	204	BC	4.8	204	BC	0.9	204	BC	0.6	204	BC	3.5	204	BC	4.1	204	BC	1.8	204	BC
4.9	205	BC	2.4	205	BC	0.7	205	BC	0.6	205	BC	4.6	205	BC	0.9	205	BC	4.9	205	BC	0.9	205	BC	0.6	205	BC	3.5	205	BC	4.1	205	BC	1.8	205	BC
5	206	BC	2.4	206	BC	0.7	206	BC	0.6	206	BC	4.6	206	BC	0.9	206	BC	4.9	206	BC	0.9	206	BC	0.6	206	BC	3.5	206	BC	4.2	206	BC	1.8	206	BC
5	207	BC	2.4	207	BC	0.7	207	BC	0.6	207	BC	4.6	207	BC	0.9	207	BC	4.9	207	BC	0.9	207	BC	0.6	207	BC	3.5	207	BC	4.2	207	BC	1.8	207	BC
5	208	BC	2.4	208	BC	0.8	208	BC	0.6	208	BC	4.6	208	BC	1	208	BC	5	208	BC	0.9	208	BC	0.7	208	BC	3.6	208	BC	4.2	208	BC	1.8	208	BC
5	209	BC	2.5	209	BC	0.8	209	BC	0.6	209	BC	4.6	209	BC	1	209	BC	5	209	BC	0.9	209	BC	0.7	209	BC	3.6	209	BC	4.2	209	BC	1.9	209	BC
5.1	210	BC	2.5	210	BC	0.8	210	BC	0.6	210	BC	4.7	210	BC	1	210	BC	5	210	BC	0.9	210	BC	0.7	210	BC	3.6	210	BC	4.3	210	BC	1.9	210	BC
5.1	211	BC	2.5	211	BC	0.8	211	BC	0.6	211	BC	4.7	211	BC	1	211	BC	5	211	BC	0.9	211	BC	0.7	211	BC	3.6	211	BC	4.3	211	BC	1.9	211	BC
5.1	212	BC	2.5	212	BC	0.8	212	BC	0.6	212	BC	4.7	212	BC	1	212	BC	5.1	212	BC	0.9	212	BC	0.7	212	BC	3.6	212	BC	4.3	212	BC	1.9	212	BC
5.1	213	BC	2.5	213	BC	0.8	213	BC	0.6	213	BC	4.7	213	BC	1	213	BC	5.1	213	BC	0.9	213	BC	0.7	213	BC	3.6	213	BC	4.3	213	BC	1.9	213	BC
5.1	214	BC	2.5	214	BC	0.8	214	BC	0.6	214	BC	4.8	214	BC	1	214	BC	5.1	214	BC	0.9	214	BC	0.7	214	BC	3.7	214	BC	4.3	214	BC	1.9	214	BC
5.2	215	BC	2.5	215	BC	0.8	215	BC	0.6	215	BC	4.8	215	BC	1	215	BC	5.1	215	BC	0.9	215	BC	0.7	215	BC	3.7	215	BC	4.4	215	BC	1.9	215	BC
5.2	216	BC	2.5	216	BC	0.8	216	BC	0.7	216	BC	4.8	216	BC	1	216	BC	5.2	216	BC	0.9	216	BC	0.7	216	BC	3.7	216	BC	4.4	216	BC	1.9	216	BC
5.2	217	BC	2.5	217	BC	0.8	217	BC	0.7	217	BC	4.8	217	BC	1	217	BC	5.2	217	BC	0.9	217	BC	0.7	217	BC	3.7	217	BC	4.4	217	BC	1.9	217	BC
5.2	218	BC	2.6	218	BC	0.8	218	BC	0.7	218	BC	4.8	218	BC	1	218	BC	5.2	218	BC	0.9	218	BC	0.7	218	BC	3.8	218	BC	4.4	218	BC	1.9	218	BC
5.3	219	BC	2.6	219	BC	0.8	219	BC	0.7	219	BC	4.9	219	BC	1	219	BC	5.2	219	BC	0.9	219	BC	0.7	219	BC	3.8	219	BC	4.4	219	BC	1.9	219	BC
5.3	220	BC	2.6	220	BC	0.8	220	BC	0.7	220	BC	4.9	220	BC	1	220	BC	5.3	220	BC	1	220	BC	0.7	220	BC	3.8	220	BC	4.5	220	BC	2	220	BC
5.3	221	BC	2.6	221	BC	0.8	221	BC	0.7	221	BC	4.9	221	BC	1	221	BC	5.3	221	BC	1	221	BC	0.7	221	BC	3.8	221	BC	4.5	221	BC	2	221	BC
5.3	222	BC	2.6	222	BC	0.8	222	BC	0.7	222	BC	4.9	222	BC	1	222	BC	5.3	222	BC	1	222	BC	0.7	222	BC	3.8	222	BC	4.5	222	BC	2	222	BC
5.4	223	BC	2.6	223	BC	0.8	223	BC	0.7	223	BC	4.9	223	BC	1	223	BC	5.4	223	BC	1	223	BC	0.7	223	BC	3.9	223	BC	4.5	223	BC	2	223	BC
5.4	224	BC	2.6	224	BC	0.8	224	BC	0.7	224	BC	5	224	BC	1	224	BC	5.4	224	BC	1	224	BC	0.7	224	BC	3.9	224	BC	4.5	224	BC	2	224	BC
5.4	225	BC	2.6	225	BC	0.8	225	BC	0.7	225	BC	5	225	BC	1	225	BC	5.4	225	BC	1	225	BC	0.7	225	BC	3.9	225	BC	4.6	225	BC	2	225	BC
5.4	226	BC	2.7	226	BC	0.8	226	BC	0.7	226	BC	5	226	BC	1	226	BC	5.4	226	BC	1	226	BC	0.7	226	BC	3.9	226	BC	4.6	226	BC	2	226	BC
5.5	227	BC	2.7	227	BC	0.8	227	BC	0.7	227	BC	5	227	BC	1	227	BC	5.5	227	BC	1	227	BC	0.7	227	BC	3.9	227	BC	4.6	227	BC	2	227	BC
5.5	228	BC	2.7	228	BC	0.8	228	BC	0.7	228	BC	5.1	228	BC	1	228	BC	5.5	228	BC	1	228	BC	0.7	228	BC	4	228	BC	4.6	228	BC	2	228	BC
5.5	229	BC	2.7	229	BC	0.8	229	BC	0.7	229	BC	5.1	229	BC	1	229	BC	5.5	229	BC	1	229	BC	0.7	229	BC	4	229	BC	4.6	229	BC	2	229	BC
5.5	230	BC	2.7	230	BC	0.8	230	BC	0.7	230	BC	5.1	230	BC	1.1	230	BC	5.5	230	BC	1	230	BC	0.7	230	BC	4	230	BC	4.7	230	BC	2	230	BC
5.6	231	BC	2.7	231	BC	0.8	231	BC	0.7	231	BC	5.1	231	BC	1.1	231	BC	5.5	231	BC	1	231	BC	0.7	231	BC	4	231	BC	4.7	231	BC	2	231	BC
5.6	232	BC	2.7	232	BC	0.8	232	BC	0.7	232	BC	5.1	232	BC	1.1	232	BC	5.6	232	BC	1	232	BC	0.7	232	BC	4	232	BC	4.7	232	BC	2.1	232	BC
5.6	233	BC	2.7	233	BC	0.8	233	BC	0.7	233	BC	5.2	233	BC	1.1	233	BC	5.6	233	BC	1	233	BC	0.7	233	BC	4	233	BC	4.7	233	BC	2.1	233	BC
5.7	234	BC	2.7	234	BC	0.8	234	BC	0.7	234	BC	5.2	234	BC	1.1	234	BC	5.6	234	BC	1	234	BC	0.8	234	BC	4.1	234	BC	4.7	234	BC	2.1	234	BC
5.7	235	BC	2.8	235	BC	0.9	235	BC	0.7	235	BC	5.2	235	BC	1.1	235	BC	5.7	235	BC	1	235	BC	0.8	235	BC	4.1	235	BC	4.8	235	BC	2.1	235	BC
5.7	236	BC	2.8	236	BC	0.9	236	BC	0.7	236	BC	5.2	236	BC	1.1	236	BC	5.7	236	BC	1	236	BC	0.8	236	BC	4.1	236	BC	4.8	236	BC	2.1	236	BC
5.7	237	BC	2.8	237	BC	0.9	237	BC	0.7	237	BC	5.2	237	BC	1.1	237	BC	5.7	237	BC	1	237	BC	0.8	237	BC	4.1	237	BC	4.8	237	BC	2.1	237	BC
5.8	238	BC	2.8	238	BC	0.9	238	BC	0.7	238	BC	5.3	238	BC	1.1	238	BC	5.7	238	BC	1.1	238	BC	0.8	238	BC	4.1	238	BC	4.8	238	BC	2.1	238	BC
5.8	239	BC	2.8	239	BC	0.9	239	BC	0.7	239	BC	5.3	239	BC	1.1	239	BC	5.8	239	BC	1.1	239	BC	0.8	239	BC	4.1	239	BC	4.8	239	BC	2.1	239	BC
5.8	240	BC	2.8	240	BC	0.9	240	BC	0.7	240	BC	5.3	240	BC	1.1	240	BC	5.8	240	BC	1.1	240	BC	0.8	240	BC	4.2	240	BC	4.9	240	BC	2.1	240	BC
5.8	241	BC	2.8	241	BC	0.9	241	BC	0.7	241	BC	5.4	241	BC	1.1	241	BC	5.8	241	BC	1.1	241	BC	0.8	241	BC	4.2	241	BC	4.9	241	BC	2.1	241	BC
5.9	242	BC	2.8	242	BC	0.9	242	BC	0.7	242	BC	5.4	242	BC	1.1	242	BC	5.9	242	BC	1.1	242	BC	0.8	242	BC	4.2	242	BC	4.9	242	BC	2.2	242	BC
5.9	243	BC	2.8	243	BC	0.9	243	BC	0.7	243	BC	5.4	243	BC	1.1	243	BC	5.9	243	BC	1.1	243	BC	0.8	243	BC	4.2	243	BC	4.9	243	BC	2.2	243	BC
5.9	244	BC	2.9	244	BC	0.9	244	BC	0.7	244	BC	5.4	244	BC	1.1	244	BC	5.9	244	BC	1.1	244	BC	0.8	244	BC	4.2	244	BC	4.9	244	BC	2.2	244	BC
5.9	245	BC	2.9	245	BC	0.9	245	BC	0.7	245	BC	5.4	245	BC	1.1	245	BC	5.9	245	BC	1.1	245	BC	0.8	245	BC	4.2	245	BC	5	245	BC	2.2	245	BC
6	246	BC	2.9	246	BC	0.9	246	BC	0.7	246	BC	5.5	246	BC	1.1	246	BC	6	246	BC	1.1	246	BC	0.8	246	BC	4.3	246	BC	5	246	BC	2.2	246	BC
6	247	BC	2.9	247	BC	0.9	247	BC	0.7	247	BC	5.5	247	BC	1.1	247	BC	6	247	BC	1.1	247	BC	0.8	247	BC	4.3	247	BC	5	247	BC	2.2	247	BC
6	248	BC	2.9	248	BC	0.9	248	BC	0.8	248	BC	5.5	248	BC	1.1	248	BC	6	248	BC	1.1	248	BC	0.8	248	BC	4.3	248	BC	5	248	BC	2.2	248	BC
6	249	BC	2.9	249	BC	0.9	249	BC	0.8	249	BC	5.6	249	BC	1.1	249	BC	6	249	BC	1.1	249	BC	0.8	249	BC	4.3	249	BC	5	249	BC	2.2	249	BC
6.1	250	BC	2.9	250	BC	0.9	250	BC	0.8	250	BC	5.6	250	BC	1.1	250	BC	6.1	250	BC	1.1	250	BC	0.8	250	BC	4.3	250	BC	5.1	250	BC	2.2	250	BC
6.1	251	BC	2.9	251	BC	0.9	251	BC	0.8	251	BC	5.6	251	BC	1.2	251	BC	6.1	251	BC	1.1	251	BC	0.8	251	BC	4.4	251	BC	5.1	251	BC	2.2	251	BC
6.1	252	BC	3	252	BC	0.9	252	BC	0.8	252	BC	5.6	252	BC	1.2	252	BC	6.1	252	BC	1.1	252	BC	0.8	252	BC	4.4	252	BC	5.1	252	BC	2.2	252	BC
6.1	253	BC	3	253	BC	0.9	253	BC	0.8	253	BC	5.7	253	BC	1.2	253	BC	6.1	253	BC	1.1	253	BC	0.8	253	BC	4.4	253	BC	5.1	253	BC	2.2	253	BC
6.2	254	BC	3	254	BC	0.9	254	BC	0.8	254	BC	5.7	254	BC	1.2	254	BC	6.2	254	BC	1.1	254	BC	0.8	254	BC	4.4	254	BC	5.1	254	BC	2.3	254	BC
6.2	255	BC	3	255	BC	0.9	255	BC	0.8	255	BC	5.7	255	BC	1.2	255	BC	6.2	255	BC	1.1	255	BC	0.8	255	BC	4.4	255	BC	5.2	255	BC	2.3	255	BC
6.2	256	BC	3	256	BC	0.9	256	BC	0.8	256	BC	5.7	256	BC	1.2	256	BC	6.2	256	BC	1.2	256	BC	0.8	256	BC	4.4	256	BC	5.2	256	BC	2.3	256	BC
6.2	257	BC	3	257	BC	0.9	257	BC	0.8	257	BC	5.8	257	BC	1.2	257	BC	6.2	257	BC	1.2	257	BC	0.8	257	BC	4.5	257	BC	5.2	257	BC	2.3	257	BC
6.3	258	BC	3	258	BC	0.9	258	BC	0.8	258	BC	5.8	258	BC	1.2	258	BC	6.3	258	BC	1.2	258	BC	0.8	258	BC	4.5	258	BC	5.2	258	BC	2.3	258	BC
6.3	259	BC	3	259	BC	0.9	259	BC	0.8	259	BC	5.8	259	BC	1.2	259	BC	6.3	259	BC	1.2	259	BC	0.8	259	BC	4.5	259	BC	5.2	259	BC	2.3	259	BC
6.3	260	BC	3.1	260	BC	0.9	260	BC	0.8	260	BC	5.8	260	BC	1.2	260	BC	6.3	260	BC	1.2	260	BC	0.9	260	BC	4.5	260	BC	5.3	260	BC	2.3	260	BC
6.3	261	BC	3.1	261	BC	1	261	BC	0.8	261	BC	5.9	261	BC	1.2	261	BC	6.4	261	BC	1.2	261	BC	0.9	261	BC	4.5	261	BC	5.3	261	BC	2.3	261	BC
6.3	262	BC	3.1	262	BC	1	262	BC	0.8	262	BC	5.9	262	BC	1.2	262	BC	6.4	262	BC	1.2	262	BC	0.9	262	BC	4.5	262	BC	5.3	262	BC	2.3	262	BC
6.4	263	BC	3.1	263	BC	1	263	BC	0.8	263	BC	5.9	263	BC	1.2	263	BC	6.4	263	BC	1.2	263	BC	0.9	263	BC	4.6	263	BC	5.3	263	BC	2.3	263	BC
6.4	264	BC	3.1	264	BC	1	264	BC	0.8	264	BC	5.9	264	BC	1.2	264	BC	6.5	264	BC	1.2	264	BC	0.9	264	BC	4.6	264	BC	5.3	264	BC	2.3	264	BC
6.4	265	BC	3.1	265	BC	1	265	BC	0.8	265	BC	5.9	265	BC	1.2	265	BC	6.5	265	BC	1.2	265	BC	0.9	265	BC	4.6	265	BC	5.4	265	BC	2.4	265	BC
6.5	266	BC	3.1	266	BC	1	266	BC	0.8	266	BC	6	266	BC	1.2	266	BC	6.5	266	BC	1.2	266	BC	0.9	266	BC	4.6	266	BC	5.4	266	BC	2.4	266	BC
6.5	267	BC	3.1	267	BC	1	267	BC	0.8	267	BC	6	267	BC	1.2	267	BC	6.5	267	BC	1.2	267	BC	0.9	267	BC	4.6	267	BC	5.4	267	BC	2.4	267	BC
6.5	268	BC	3.1	268	BC	1	268	BC	0.8	268	BC	6	268	BC	1.2	268	BC	6.5	268	BC	1.2	268	BC	0.9	268	BC	4.6	268	BC	5.4	268	BC	2.4	268	BC
6.5	269	BC	3.2	269	BC	1	269	BC	0.8	269	BC	6	269	BC	1.2	269	BC	6.6	269	BC	1.2	269	BC	0.9	269	BC	4.7	269	BC	5.4	269	BC	2.4	269	BC
6.6	270	BC	3.2	270	BC	1	270	BC	0.8	270	BC	6.1	270	BC	1.3	270	BC	6.6	270	BC	1.2	270	BC	0.9	270	BC	4.7	270	BC	5.5	270	BC	2.4	270	BC
6.6	271	BC	3.2	271	BC	1	271	BC	0.8	271	BC	6.1	271	BC	1.3	271	BC	6.6	271	BC	1.2	271	BC	0.9	271	BC	4.7	271	BC	5.5	271	BC	2.4	271	BC
6.6	272	BC	3.2	272	BC	1	272	BC	0.8	272	BC	6.1	272	BC	1.3	272	BC	6.7	272	BC	1.2	272	BC	0.9	272	BC	4.7	272	BC	5.5	272	BC	2.4	272	BC
6.6	273	BC	3.2	273	BC	1	273	BC	0.8	273	BC	6.1	273	BC	1.3	273	BC	6.7	273	BC	1.2	273	BC	0.9	273	BC	4.7	273	BC	5.5	273	BC	2.4	273	BC
6.7	274	BC	3.2	274	BC	1	274	BC	0.8	274	BC	6.2	274	BC	1.3	274	BC	6.7	274	BC	1.2	274	BC	0.9	274	BC	4.7	274	BC	5.5	274	BC	2.4	274	BC
6.7	275	BC	3.2	275	BC	1	275	BC	0.8	275	BC	6.2	275	BC	1.3	275	BC	6.7	275	BC	1.2	275	BC	0.9	275	BC	4.8	275	BC	5.6	275	BC	2.4	275	BC
6.7	276	BC	3.3	276	BC	1	276	BC	0.8	276	BC	6.2	276	BC	1.3	276	BC	6.8	276	BC	1.2	276	BC	0.9	276	BC	4.8	276	BC	5.6	276	BC	2.5	276	BC
6.8	277	BC	3.3	277	BC	1	277	BC	0.8	277	BC	6.2	277	BC	1.3	277	BC	6.8	277	BC	1.2	277	BC	0.9	277	BC	4.8	277	BC	5.6	277	BC	2.5	277	BC
6.8	278	BC	3.3	278	BC	1	278	BC	0.8	278	BC	6.3	278	BC	1.3	278	BC	6.8	278	BC	1.2	278	BC	0.9	278	BC	4.8	278	BC	5.6	278	BC	2.5	278	BC
6.8	279	BC	3.3	279	BC	1	279	BC	0.8	279	BC	6.3	279	BC	1.3	279	BC	6.8	279	BC	1.2	279	BC	0.9	279	BC	4.8	279	BC	5.6	279	BC	2.5	279	BC
6.8	280	BC	3.3	280	BC	1	280	BC	0.8	280	BC	6.3	280	BC	1.3	280	BC	6.9	280	BC	1.3	280	BC	0.9	280	BC	4.8	280	BC	5.7	280	BC	2.5	280	BC
6.9	281	BC	3.3	281	BC	1	281	BC	0.8	281	BC	6.3	281	BC	1.3	281	BC	6.9	281	BC	1.3	281	BC	0.9	281	BC	4.9	281	BC	5.7	281	BC	2.5	281	BC
6.9	282	BC	3.3	282	BC	1	282	BC	0.9	282	BC	6.3	282	BC	1.3	282	BC	6.9	282	BC	1.3	282	BC	0.9	282	BC	4.9	282	BC	5.7	282	BC	2.5	282	BC
6.9	283	BC	3.3	283	BC	1	283	BC	0.9	283	BC	6.4	283	BC	1.3	283	BC	7	283	BC	1.3	283	BC	0.9	283	BC	4.9	283	BC	5.7	283	BC	2.5	283	BC
6.9	284	BC	3.4	284	BC	1	284	BC	0.9	284	BC	6.4	284	BC	1.3	284	BC	7	284	BC	1.3	284	BC	0.9	284	BC	4.9	284	BC	5.7	284	BC	2.5	284	BC
7	285	BC	3.4	285	BC	1	285	BC	0.9	285	BC	6.4	285	BC	1.3	285	BC	7	285	BC	1.3	285	BC	0.9	285	BC	4.9	285	BC	5.8	285	BC	2.6	285	BC
7	286	BC	3.4	286	BC	1.1	286	BC	0.9	286	BC	6.5	286	BC	1.3	286	BC	7	286	BC	1.3	286	BC	0.9	286	BC	4.9	286	BC	5.8	286	BC	2.6	286	BC
7	287	BC	3.4	287	BC	1.1	287	BC	0.9	287	BC	6.5	287	BC	1.3	287	BC	7	287	BC	1.3	287	BC	0.9	287	BC	5	287	BC	5.8	287	BC	2.6	287	BC
7	288	BC	3.4	288	BC	1.1	288	BC	0.9	288	BC	6.5	288	BC	1.3	288	BC	7.1	288	BC	1.3	288	BC	1	288	BC	5	288	BC	5.8	288	BC	2.6	288	BC
7.1	289	BC	3.4	289	BC	1.1	289	BC	0.9	289	BC	6.6	289	BC	1.4	289	BC	7.1	289	BC	1.3	289	BC	1	289	BC	5	289	BC	5.8	289	BC	2.6	289	BC
7.1	290	BC	3.4	290	BC	1.1	290	BC	0.9	290	BC	6.6	290	BC	1.4	290	BC	7.1	290	BC	1.3	290	BC	1	290	BC	5	290	BC	5.9	290	BC	2.6	290	BC
7.1	291	BC	3.4	291	BC	1.1	291	BC	0.9	291	BC	6.6	291	BC	1.4	291	BC	7.2	291	BC	1.3	291	BC	1	291	BC	5	291	BC	5.9	291	BC	2.6	291	BC
7.1	292	BC	3.4	292	BC	1.1	292	BC	0.9	292	BC	6.6	292	BC	1.4	292	BC	7.2	292	BC	1.3	292	BC	1	292	BC	5	292	BC	5.9	292	BC	2.6	292	BC
7.2	293	BC	3.5	293	BC	1.1	293	BC	0.9	293	BC	6.7	293	BC	1.4	293	BC	7.2	293	BC	1.3	293	BC	1	293	BC	5.1	293	BC	5.9	293	BC	2.6	293	BC
7.2	294	BC	3.5	294	BC	1.1	294	BC	0.9	294	BC	6.7	294	BC	1.4	294	BC	7.3	294	BC	1.3	294	BC	1	294	BC	5.1	294	BC	6	294	BC	2.6	294	BC
7.2	295	BC	3.5	295	BC	1.1	295	BC	0.9	295	BC	6.7	295	BC	1.4	295	BC	7.3	295	BC	1.3	295	BC	1	295	BC	5.1	295	BC	6	295	BC	2.6	295	BC
7.3	296	BC	3.5	296	BC	1.1	296	BC	0.9	296	BC	6.7	296	BC	1.4	296	BC	7.3	296	BC	1.3	296	BC	1	296	BC	5.1	296	BC	6	296	BC	2.7	296	BC
7.3	297	BC	3.5	297	BC	1.1	297	BC	0.9	297	BC	6.8	297	BC	1.4	297	BC	7.3	297	BC	1.3	297	BC	1	297	BC	5.1	297	BC	6	297	BC	2.7	297	BC
7.3	298	BC	3.5	298	BC	1.1	298	BC	0.9	298	BC	6.8	298	BC	1.4	298	BC	7.4	298	BC	1.3	298	BC	1	298	BC	5.1	298	BC	6	298	BC	2.7	298	BC
7.3	299	BC	3.5	299	BC	1.1	299	BC	0.9	299	BC	6.8	299	BC	1.4	299	BC	7.4	299	BC	1.4	299	BC	1	299	BC	5.2	299	BC	6.1	299	BC	2.7	299	BC
7.4	300	BC	3.5	300	BC	1.1	300	BC	0.9	300	BC	6.8	300	BC	1.4	300	BC	7.5	300	BC	1.4	300	BC	1	300	BC	5.2	300	BC	6.1	300	BC	2.7	300	BC
7.4	301	BC	3.6	301	BC	1.1	301	BC	0.9	301	BC	6.8	301	BC	1.4	301	BC	7.5	301	BC	1.4	301	BC	1	301	BC	5.2	301	BC	6.1	301	BC	2.7	301	BC
7.4	302	BC	3.6	302	BC	1.1	302	BC	0.9	302	BC	6.9	302	BC	1.4	302	BC	7.5	302	BC	1.4	302	BC	1	302	BC	5.2	302	BC	6.1	302	BC	2.7	302	BC
7.4	303	BC	3.6	303	BC	1.1	303	BC	0.9	303	BC	6.9	303	BC	1.4	303	BC	7.6	303	BC	1.4	303	BC	1	303	BC	5.2	303	BC	6.1	303	BC	2.7	303	BC
7.5	304	BC	3.6	304	BC	1.1	304	BC	0.9	304	BC	6.9	304	BC	1.4	304	BC	7.6	304	BC	1.4	304	BC	1	304	BC	5.2	304	BC	6.2	304	BC	2.7	304	BC
7.5	305	BC	3.6	305	BC	1.1	305	BC	0.9	305	BC	6.9	305	BC	1.4	305	BC	7.7	305	BC	1.4	305	BC	1	305	BC	5.3	305	BC	6.2	305	BC	2.7	305	BC
7.5	306	BC	3.6	306	BC	1.1	306	BC	0.9	306	BC	7	306	BC	1.4	306	BC	7.7	306	BC	1.4	306	BC	1	306	BC	5.3	306	BC	6.2	306	BC	2.7	306	BC
7.5	307	BC	3.6	307	BC	1.1	307	BC	0.9	307	BC	7	307	BC	1.4	307	BC	7.7	307	BC	1.4	307	BC	1	307	BC	5.3	307	BC	6.2	307	BC	2.8	307	BC
7.6	308	BC	3.6	308	BC	1.1	308	BC	0.9	308	BC	7	308	BC	1.4	308	BC	7.7	308	BC	1.4	308	BC	1	308	BC	5.3	308	BC	6.2	308	BC	2.8	308	BC
7.6	309	BC	3.7	309	BC	1.1	309	BC	0.9	309	BC	7.1	309	BC	1.5	309	BC	7.8	309	BC	1.4	309	BC	1	309	BC	5.3	309	BC	6.3	309	BC	2.8	309	BC
7.6	310	BC	3.7	310	BC	1.1	310	BC	1	310	BC	7.1	310	BC	1.5	310	BC	7.8	310	BC	1.4	310	BC	1	310	BC	5.3	310	BC	6.3	310	BC	2.8	310	BC
7.6	311	BC	3.7	311	BC	1.1	311	BC	1	311	BC	7.1	311	BC	1.5	311	BC	7.8	311	BC	1.4	311	BC	1	311	BC	5.4	311	BC	6.3	311	BC	2.8	311	BC
7.6	312	BC	3.7	312	BC	1.1	312	BC	1	312	BC	7.1	312	BC	1.5	312	BC	7.8	312	BC	1.4	312	BC	1	312	BC	5.4	312	BC	6.3	312	BC	2.8	312	BC
7.7	313	BC	3.7	313	BC	1.2	313	BC	1	313	BC	7.2	313	BC	1.5	313	BC	7.8	313	BC	1.4	313	BC	1.1	313	BC	5.4	313	BC	6.3	313	BC	2.8	313	BC
7.7	314	BC	3.7	314	BC	1.2	314	BC	1	314	BC	7.2	314	BC	1.5	314	BC	7.9	314	BC	1.4	314	BC	1.1	314	BC	5.4	314	BC	6.4	314	BC	2.8	314	BC
7.7	315	BC	3.7	315	BC	1.2	315	BC	1	315	BC	7.2	315	BC	1.5	315	BC	7.9	315	BC	1.4	315	BC	1.1	315	BC	5.4	315	BC	6.4	315	BC	2.8	315	BC
7.8	316	BC	3.8	316	BC	1.2	316	BC	1	316	BC	7.3	316	BC	1.5	316	BC	7.9	316	BC	1.4	316	BC	1.1	316	BC	5.5	316	BC	6.4	316	BC	2.9	316	BC
7.8	317	BC	3.8	317	BC	1.2	317	BC	1	317	BC	7.3	317	BC	1.5	317	BC	7.9	317	BC	1.5	317	BC	1.1	317	BC	5.5	317	BC	6.4	317	BC	2.9	317	BC
7.8	318	BC	3.8	318	BC	1.2	318	BC	1	318	BC	7.3	318	BC	1.5	318	BC	8	318	BC	1.5	318	BC	1.1	318	BC	5.5	318	BC	6.4	318	BC	2.9	318	BC
7.8	319	BC	3.8	319	BC	1.2	319	BC	1	319	BC	7.3	319	BC	1.5	319	BC	8	319	BC	1.5	319	BC	1.1	319	BC	5.5	319	BC	6.5	319	BC	2.9	319	BC
7.9	320	BC	3.8	320	BC	1.2	320	BC	1	320	BC	7.3	320	BC	1.5	320	BC	8	320	BC	1.5	320	BC	1.1	320	BC	5.5	320	BC	6.5	320	BC	2.9	320	BC
7.9	321	BC	3.8	321	BC	1.2	321	BC	1	321	BC	7.4	321	BC	1.5	321	BC	8.1	321	BC	1.5	321	BC	1.1	321	BC	5.5	321	BC	6.5	321	BC	2.9	321	BC
7.9	322	BC	3.8	322	BC	1.2	322	BC	1	322	BC	7.4	322	BC	1.5	322	BC	8.1	322	BC	1.5	322	BC	1.1	322	BC	5.6	322	BC	6.5	322	BC	2.9	322	BC
7.9	323	BC	3.9	323	BC	1.2	323	BC	1	323	BC	7.4	323	BC	1.5	323	BC	8.1	323	BC	1.5	323	BC	1.1	323	BC	5.6	323	BC	6.5	323	BC	2.9	323	BC
8	324	BC	3.9	324	BC	1.2	324	BC	1	324	BC	7.4	324	BC	1.5	324	BC	8.1	324	BC	1.5	324	BC	1.1	324	BC	5.6	324	BC	6.6	324	BC	2.9	324	BC
8	325	BC	3.9	325	BC	1.2	325	BC	1	325	BC	7.5	325	BC	1.5	325	BC	8.2	325	BC	1.5	325	BC	1.1	325	BC	5.6	325	BC	6.6	325	BC	2.9	325	BC
8	326	BC	3.9	326	BC	1.2	326	BC	1	326	BC	7.5	326	BC	1.5	326	BC	8.2	326	BC	1.5	326	BC	1.1	326	BC	5.6	326	BC	6.6	326	BC	2.9	326	BC
8	327	BC	3.9	327	BC	1.2	327	BC	1	327	BC	7.5	327	BC	1.5	327	BC	8.2	327	BC	1.5	327	BC	1.1	327	BC	5.7	327	BC	6.6	327	BC	3	327	BC
8.1	328	BC	3.9	328	BC	1.2	328	BC	1	328	BC	7.6	328	BC	1.5	328	BC	8.2	328	BC	1.5	328	BC	1.1	328	BC	5.7	328	BC	6.6	328	BC	3	328	BC
8.1	329	BC	3.9	329	BC	1.2	329	BC	1	329	BC	7.6	329	BC	1.5	329	BC	8.3	329	BC	1.5	329	BC	1.1	329	BC	5.7	329	BC	6.7	329	BC	3	329	BC
8.1	330	BC	3.9	330	BC	1.2	330	BC	1	330	BC	7.6	330	BC	1.5	330	BC	8.3	330	BC	1.5	330	BC	1.1	330	BC	5.7	330	BC	6.7	330	BC	3	330	BC
8.1	331	BC	3.9	331	BC	1.2	331	BC	1	331	BC	7.7	331	BC	1.6	331	BC	8.3	331	BC	1.5	331	BC	1.1	331	BC	5.7	331	BC	6.7	331	BC	3	331	BC
8.2	332	BC	4	332	BC	1.2	332	BC	1	332	BC	7.7	332	BC	1.6	332	BC	8.3	332	BC	1.5	332	BC	1.1	332	BC	5.7	332	BC	6.7	332	BC	3	332	BC
8.2	333	BC	4	333	BC	1.2	333	BC	1	333	BC	7.7	333	BC	1.6	333	BC	8.3	333	BC	1.5	333	BC	1.1	333	BC	5.8	333	BC	6.7	333	BC	3	333	BC
8.2	334	BC	4	334	BC	1.2	334	BC	1	334	BC	7.7	334	BC	1.6	334	BC	8.4	334	BC	1.5	334	BC	1.2	334	BC	5.8	334	BC	6.8	334	BC	3	334	BC
8.2	335	BC	4	335	BC	1.2	335	BC	1	335	BC	7.8	335	BC	1.6	335	BC	8.4	335	BC	1.5	335	BC	1.2	335	BC	5.8	335	BC	6.8	335	BC	3	335	BC
8.2	336	BC	4	336	BC	1.2	336	BC	1	336	BC	7.8	336	BC	1.6	336	BC	8.5	336	BC	1.6	336	BC	1.2	336	BC	5.8	336	BC	6.8	336	BC	3.1	336	BC
8.3	337	BC	4	337	BC	1.2	337	BC	1	337	BC	7.8	337	BC	1.6	337	BC	8.5	337	BC	1.6	337	BC	1.2	337	BC	5.8	337	BC	6.8	337	BC	3.1	337	BC
8.3	338	BC	4	338	BC	1.2	338	BC	1	338	BC	7.8	338	BC	1.6	338	BC	8.5	338	BC	1.6	338	BC	1.2	338	BC	5.9	338	BC	6.8	338	BC	3.1	338	BC
8.3	339	BC	4	339	BC	1.2	339	BC	1	339	BC	7.9	339	BC	1.6	339	BC	8.6	339	BC	1.6	339	BC	1.2	339	BC	5.9	339	BC	6.9	339	BC	3.1	339	BC
8.3	340	BC	4.1	340	BC	1.2	340	BC	1.1	340	BC	7.9	340	BC	1.6	340	BC	8.6	340	BC	1.6	340	BC	1.2	340	BC	5.9	340	BC	6.9	340	BC	3.1	340	BC
8.4	341	BC	4.1	341	BC	1.3	341	BC	1.1	341	BC	7.9	341	BC	1.6	341	BC	8.7	341	BC	1.6	341	BC	1.2	341	BC	5.9	341	BC	6.9	341	BC	3.1	341	BC
8.4	342	BC	4.1	342	BC	1.3	342	BC	1.1	342	BC	7.9	342	BC	1.6	342	BC	8.7	342	BC	1.6	342	BC	1.2	342	BC	6	342	BC	6.9	342	BC	3.1	342	BC
8.4	343	BC	4.1	343	BC	1.3	343	BC	1.1	343	BC	7.9	343	BC	1.6	343	BC	8.7	343	BC	1.6	343	BC	1.2	343	BC	6	343	BC	6.9	343	BC	3.1	343	BC
8.5	344	BC	4.1	344	BC	1.3	344	BC	1.1	344	BC	8	344	BC	1.6	344	BC	8.8	344	BC	1.6	344	BC	1.2	344	BC	6	344	BC	7	344	BC	3.1	344	BC
8.5	345	BC	4.1	345	BC	1.3	345	BC	1.1	345	BC	8	345	BC	1.6	345	BC	8.8	345	BC	1.6	345	BC	1.2	345	BC	6	345	BC	7	345	BC	3.1	345	BC
8.5	346	BC	4.1	346	BC	1.3	346	BC	1.1	346	BC	8	346	BC	1.6	346	BC	8.8	346	BC	1.6	346	BC	1.2	346	BC	6	346	BC	7	346	BC	3.1	346	BC
8.5	347	BC	4.1	347	BC	1.3	347	BC	1.1	347	BC	8	347	BC	1.6	347	BC	8.8	347	BC	1.6	347	BC	1.2	347	BC	6	347	BC	7	347	BC	3.1	347	BC
8.6	348	BC	4.1	348	BC	1.3	348	BC	1.1	348	BC	8	348	BC	1.6	348	BC	8.8	348	BC	1.6	348	BC	1.2	348	BC	6.1	348	BC	7.1	348	BC	3.2	348	BC
8.7	349	BC	4.2	349	BC	1.3	349	BC	1.1	349	BC	8.1	349	BC	1.7	349	BC	8.9	349	BC	1.6	349	BC	1.2	349	BC	6.1	349	BC	7.1	349	BC	3.2	349	BC
8.7	350	BC	4.2	350	BC	1.3	350	BC	1.1	350	BC	8.1	350	BC	1.7	350	BC	8.9	350	BC	1.6	350	BC	1.2	350	BC	6.1	350	BC	7.1	350	BC	3.2	350	BC
8.7	351	BC	4.2	351	BC	1.3	351	BC	1.1	351	BC	8.1	351	BC	1.7	351	BC	8.9	351	BC	1.6	351	BC	1.2	351	BC	6.1	351	BC	7.1	351	BC	3.2	351	BC
8.8	352	BC	4.2	352	BC	1.3	352	BC	1.1	352	BC	8.1	352	BC	1.7	352	BC	8.9	352	BC	1.6	352	BC	1.2	352	BC	6.1	352	BC	7.1	352	BC	3.2	352	BC
8.8	353	BC	4.2	353	BC	1.3	353	BC	1.1	353	BC	8.2	353	BC	1.7	353	BC	9	353	BC	1.6	353	BC	1.2	353	BC	6.1	353	BC	7.2	353	BC	3.2	353	BC
8.8	354	BC	4.2	354	BC	1.3	354	BC	1.1	354	BC	8.2	354	BC	1.7	354	BC	9	354	BC	1.7	354	BC	1.2	354	BC	6.2	354	BC	7.2	354	BC	3.2	354	BC
8.8	355	BC	4.2	355	BC	1.3	355	BC	1.1	355	BC	8.2	355	BC	1.7	355	BC	9	355	BC	1.7	355	BC	1.2	355	BC	6.2	355	BC	7.2	355	BC	3.2	355	BC
8.9	356	BC	4.3	356	BC	1.3	356	BC	1.1	356	BC	8.2	356	BC	1.7	356	BC	9	356	BC	1.7	356	BC	1.2	356	BC	6.2	356	BC	7.2	356	BC	3.2	356	BC
8.9	357	BC	4.3	357	BC	1.3	357	BC	1.1	357	BC	8.3	357	BC	1.7	357	BC	9.1	357	BC	1.7	357	BC	1.3	357	BC	6.2	357	BC	7.2	357	BC	3.2	357	BC
8.9	358	BC	4.3	358	BC	1.3	358	BC	1.1	358	BC	8.3	358	BC	1.7	358	BC	9.1	358	BC	1.7	358	BC	1.3	358	BC	6.2	358	BC	7.3	358	BC	3.3	358	BC
8.9	359	BC	4.3	359	BC	1.3	359	BC	1.1	359	BC	8.3	359	BC	1.7	359	BC	9.1	359	BC	1.7	359	BC	1.3	359	BC	6.2	359	BC	7.3	359	BC	3.3	359	BC
8.9	360	BC	4.3	360	BC	1.3	360	BC	1.1	360	BC	8.3	360	BC	1.7	360	BC	9.2	360	BC	1.7	360	BC	1.3	360	BC	6.3	360	BC	7.3	360	BC	3.3	360	BC
9	361	BC	4.3	361	BC	1.3	361	BC	1.1	361	BC	8.3	361	BC	1.7	361	BC	9.2	361	BC	1.7	361	BC	1.3	361	BC	6.3	361	BC	7.3	361	BC	3.3	361	BC
9	362	BC	4.4	362	BC	1.3	362	BC	1.1	362	BC	8.4	362	BC	1.7	362	BC	9.2	362	BC	1.7	362	BC	1.3	362	BC	6.3	362	BC	7.4	362	BC	3.3	362	BC
9	363	BC	4.4	363	BC	1.3	363	BC	1.1	363	BC	8.4	363	BC	1.7	363	BC	9.3	363	BC	1.7	363	BC	1.3	363	BC	6.3	363	BC	7.4	363	BC	3.3	363	BC
9	364	BC	4.4	364	BC	1.4	364	BC	1.1	364	BC	8.4	364	BC	1.7	364	BC	9.4	364	BC	1.7	364	BC	1.3	364	BC	6.3	364	BC	7.4	364	BC	3.3	364	BC
9.1	365	BC	4.4	365	BC	1.4	365	BC	1.1	365	BC	8.4	365	BC	1.7	365	BC	9.4	365	BC	1.7	365	BC	1.3	365	BC	6.3	365	BC	7.4	365	BC	3.3	365	BC
9.1	366	BC	4.4	366	BC	1.4	366	BC	1.1	366	BC	8.5	366	BC	1.7	366	BC	9.4	366	BC	1.7	366	BC	1.3	366	BC	6.4	366	BC	7.4	366	BC	3.3	366	BC
9.1	367	BC	4.4	367	BC	1.4	367	BC	1.1	367	BC	8.5	367	BC	1.7	367	BC	9.4	367	BC	1.7	367	BC	1.3	367	BC	6.4	367	BC	7.5	367	BC	3.3	367	BC
9.1	368	BC	4.4	368	BC	1.4	368	BC	1.1	368	BC	8.5	368	BC	1.7	368	BC	9.5	368	BC	1.8	368	BC	1.3	368	BC	6.4	368	BC	7.5	368	BC	3.4	368	BC
9.2	369	BC	4.4	369	BC	1.4	369	BC	1.2	369	BC	8.5	369	BC	1.8	369	BC	9.5	369	BC	1.8	369	BC	1.3	369	BC	6.4	369	BC	7.5	369	BC	3.4	369	BC
9.2	370	BC	4.4	370	BC	1.4	370	BC	1.2	370	BC	8.6	370	BC	1.8	370	BC	9.5	370	BC	1.8	370	BC	1.3	370	BC	6.4	370	BC	7.5	370	BC	3.4	370	BC
9.2	371	BC	4.5	371	BC	1.4	371	BC	1.2	371	BC	8.6	371	BC	1.8	371	BC	9.5	371	BC	1.8	371	BC	1.3	371	BC	6.5	371	BC	7.5	371	BC	3.4	371	BC
9.2	372	BC	4.5	372	BC	1.4	372	BC	1.2	372	BC	8.6	372	BC	1.8	372	BC	9.6	372	BC	1.8	372	BC	1.3	372	BC	6.5	372	BC	7.6	372	BC	3.4	372	BC
9.3	373	BC	4.5	373	BC	1.4	373	BC	1.2	373	BC	8.6	373	BC	1.8	373	BC	9.6	373	BC	1.8	373	BC	1.3	373	BC	6.5	373	BC	7.6	373	BC	3.4	373	BC
9.3	374	BC	4.5	374	BC	1.4	374	BC	1.2	374	BC	8.6	374	BC	1.8	374	BC	9.6	374	BC	1.8	374	BC	1.3	374	BC	6.5	374	BC	7.6	374	BC	3.4	374	BC
9.3	375	BC	4.5	375	BC	1.4	375	BC	1.2	375	BC	8.7	375	BC	1.8	375	BC	9.6	375	BC	1.8	375	BC	1.3	375	BC	6.5	375	BC	7.6	375	BC	3.4	375	BC
9.3	376	BC	4.5	376	BC	1.4	376	BC	1.2	376	BC	8.7	376	BC	1.8	376	BC	9.6	376	BC	1.8	376	BC	1.3	376	BC	6.6	376	BC	7.7	376	BC	3.4	376	BC
9.4	377	BC	4.5	377	BC	1.4	377	BC	1.2	377	BC	8.7	377	BC	1.8	377	BC	9.7	377	BC	1.8	377	BC	1.3	377	BC	6.6	377	BC	7.7	377	BC	3.4	377	BC
9.4	378	BC	4.5	378	BC	1.4	378	BC	1.2	378	BC	8.8	378	BC	1.8	378	BC	9.7	378	BC	1.8	378	BC	1.4	378	BC	6.6	378	BC	7.7	378	BC	3.5	378	BC
9.4	379	BC	4.6	379	BC	1.4	379	BC	1.2	379	BC	8.8	379	BC	1.8	379	BC	9.7	379	BC	1.8	379	BC	1.4	379	BC	6.6	379	BC	7.7	379	BC	3.5	379	BC
9.4	380	BC	4.6	380	BC	1.4	380	BC	1.2	380	BC	8.8	380	BC	1.8	380	BC	9.8	380	BC	1.8	380	BC	1.4	380	BC	6.6	380	BC	7.7	380	BC	3.5	380	BC
9.5	381	BC	4.6	381	BC	1.4	381	BC	1.2	381	BC	8.9	381	BC	1.8	381	BC	9.8	381	BC	1.8	381	BC	1.4	381	BC	6.7	381	BC	7.8	381	BC	3.5	381	BC
9.5	382	BC	4.6	382	BC	1.4	382	BC	1.2	382	BC	8.9	382	BC	1.8	382	BC	9.8	382	BC	1.8	382	BC	1.4	382	BC	6.7	382	BC	7.8	382	BC	3.5	382	BC
9.5	383	BC	4.6	383	BC	1.4	383	BC	1.2	383	BC	8.9	383	BC	1.8	383	BC	9.8	383	BC	1.8	383	BC	1.4	383	BC	6.7	383	BC	7.8	383	BC	3.5	383	BC
9.5	384	BC	4.6	384	BC	1.4	384	BC	1.2	384	BC	8.9	384	BC	1.8	384	BC	9.9	384	BC	1.8	384	BC	1.4	384	BC	6.7	384	BC	7.8	384	BC	3.5	384	BC
9.5	385	BC	4.6	385	BC	1.4	385	BC	1.2	385	BC	9	385	BC	1.8	385	BC	9.9	385	BC	1.8	385	BC	1.4	385	BC	6.7	385	BC	7.8	385	BC	3.5	385	BC
9.6	386	BC	4.7	386	BC	1.4	386	BC	1.2	386	BC	9	386	BC	1.8	386	BC	9.9	386	BC	1.8	386	BC	1.4	386	BC	6.8	386	BC	7.9	386	BC	3.5	386	BC
9.6	387	BC	4.7	387	BC	1.5	387	BC	1.2	387	BC	9	387	BC	1.8	387	BC	9.9	387	BC	1.9	387	BC	1.4	387	BC	6.8	387	BC	7.9	387	BC	3.5	387	BC
9.6	388	BC	4.7	388	BC	1.5	388	BC	1.2	388	BC	9.1	388	BC	1.8	388	BC	10	388	BC	1.9	388	BC	1.4	388	BC	6.8	388	BC	7.9	388	BC	3.5	388	BC
9.6	389	BC	4.7	389	BC	1.5	389	BC	1.2	389	BC	9.1	389	BC	1.9	389	BC	10	389	BC	1.9	389	BC	1.4	389	BC	6.8	389	BC	7.9	389	BC	3.6	389	BC
9.7	390	BC	4.7	390	BC	1.5	390	BC	1.2	390	BC	9.1	390	BC	1.9	390	BC	10.1	390	BC	1.9	390	BC	1.4	390	BC	6.8	390	BC	8	390	BC	3.6	390	BC
9.7	391	BC	4.7	391	BC	1.5	391	BC	1.2	391	BC	9.2	391	BC	1.9	391	BC	10.1	391	BC	1.9	391	BC	1.4	391	BC	6.9	391	BC	8	391	BC	3.6	391	BC
9.7	392	BC	4.7	392	BC	1.5	392	BC	1.2	392	BC	9.2	392	BC	1.9	392	BC	10.1	392	BC	1.9	392	BC	1.4	392	BC	6.9	392	BC	8	392	BC	3.6	392	BC
9.8	393	BC	4.7	393	BC	1.5	393	BC	1.2	393	BC	9.2	393	BC	1.9	393	BC	10.1	393	BC	1.9	393	BC	1.4	393	BC	7	393	BC	8	393	BC	3.6	393	BC
9.9	394	BC	4.8	394	BC	1.5	394	BC	1.2	394	BC	9.3	394	BC	1.9	394	BC	10.1	394	BC	1.9	394	BC	1.4	394	BC	7	394	BC	8	394	BC	3.6	394	BC
9.9	395	BC	4.8	395	BC	1.5	395	BC	1.2	395	BC	9.3	395	BC	1.9	395	BC	10.2	395	BC	1.9	395	BC	1.4	395	BC	7	395	BC	8.1	395	BC	3.6	395	BC
9.9	396	BC	4.8	396	BC	1.5	396	BC	1.2	396	BC	9.3	396	BC	1.9	396	BC	10.2	396	BC	1.9	396	BC	1.4	396	BC	7	396	BC	8.1	396	BC	3.6	396	BC
9.9	397	BC	4.8	397	BC	1.5	397	BC	1.3	397	BC	9.3	397	BC	1.9	397	BC	10.2	397	BC	1.9	397	BC	1.4	397	BC	7	397	BC	8.1	397	BC	3.6	397	BC
10	398	BC	4.8	398	BC	1.5	398	BC	1.3	398	BC	9.4	398	BC	1.9	398	BC	10.2	398	BC	1.9	398	BC	1.4	398	BC	7	398	BC	8.1	398	BC	3.6	398	BC
10	399	BC	4.8	399	BC	1.5	399	BC	1.3	399	BC	9.4	399	BC	1.9	399	BC	10.3	399	BC	1.9	399	BC	1.4	399	BC	7.1	399	BC	8.1	399	BC	3.6	399	BC
10	400	BC	4.8	400	BC	1.5	400	BC	1.3	400	BC	9.4	400	BC	1.9	400	BC	10.3	400	BC	1.9	400	BC	1.4	400	BC	7.1	400	BC	8.2	400	BC	3.7	400	BC
10	401	BC	4.8	401	BC	1.5	401	BC	1.3	401	BC	9.4	401	BC	1.9	401	BC	10.3	401	BC	1.9	401	BC	1.5	401	BC	7.1	401	BC	8.2	401	BC	3.7	401	BC
10.1	402	BC	4.9	402	BC	1.5	402	BC	1.3	402	BC	9.5	402	BC	1.9	402	BC	10.3	402	BC	2	402	BC	1.5	402	BC	7.1	402	BC	8.2	402	BC	3.7	402	BC
10.1	403	BC	4.9	403	BC	1.5	403	BC	1.3	403	BC	9.5	403	BC	1.9	403	BC	10.4	403	BC	2	403	BC	1.5	403	BC	7.1	403	BC	8.2	403	BC	3.7	403	BC
10.1	404	BC	4.9	404	BC	1.5	404	BC	1.3	404	BC	9.5	404	BC	1.9	404	BC	10.4	404	BC	2	404	BC	1.5	404	BC	7.2	404	BC	8.2	404	BC	3.7	404	BC
10.1	405	BC	4.9	405	BC	1.5	405	BC	1.3	405	BC	9.5	405	BC	1.9	405	BC	10.4	405	BC	2	405	BC	1.5	405	BC	7.2	405	BC	8.3	405	BC	3.7	405	BC
10.1	406	BC	4.9	406	BC	1.5	406	BC	1.3	406	BC	9.6	406	BC	1.9	406	BC	10.4	406	BC	2	406	BC	1.5	406	BC	7.2	406	BC	8.3	406	BC	3.7	406	BC
10.2	407	BC	4.9	407	BC	1.5	407	BC	1.3	407	BC	9.6	407	BC	1.9	407	BC	10.5	407	BC	2	407	BC	1.5	407	BC	7.2	407	BC	8.3	407	BC	3.7	407	BC
10.2	408	BC	4.9	408	BC	1.5	408	BC	1.3	408	BC	9.6	408	BC	2	408	BC	10.5	408	BC	2	408	BC	1.5	408	BC	7.2	408	BC	8.3	408	BC	3.7	408	BC
10.2	409	BC	4.9	409	BC	1.5	409	BC	1.3	409	BC	9.6	409	BC	2	409	BC	10.5	409	BC	2	409	BC	1.5	409	BC	7.2	409	BC	8.3	409	BC	3.8	409	BC
10.2	410	BC	5	410	BC	1.5	410	BC	1.3	410	BC	9.6	410	BC	2	410	BC	10.6	410	BC	2	410	BC	1.5	410	BC	7.3	410	BC	8.4	410	BC	3.8	410	BC
10.3	411	BC	5	411	BC	1.5	411	BC	1.3	411	BC	9.7	411	BC	2	411	BC	10.6	411	BC	2	411	BC	1.5	411	BC	7.3	411	BC	8.4	411	BC	3.8	411	BC
10.3	412	BC	5	412	BC	1.6	412	BC	1.3	412	BC	9.7	412	BC	2	412	BC	10.6	412	BC	2	412	BC	1.5	412	BC	7.3	412	BC	8.4	412	BC	3.8	412	BC
10.3	413	BC	5	413	BC	1.6	413	BC	1.3	413	BC	9.8	413	BC	2	413	BC	10.6	413	BC	2	413	BC	1.5	413	BC	7.3	413	BC	8.4	413	BC	3.8	413	BC
10.3	414	BC	5	414	BC	1.6	414	BC	1.3	414	BC	9.8	414	BC	2	414	BC	10.6	414	BC	2	414	BC	1.5	414	BC	7.3	414	BC	8.4	414	BC	3.8	414	BC
10.4	415	BC	5	415	BC	1.6	415	BC	1.3	415	BC	9.8	415	BC	2	415	BC	10.7	415	BC	2	415	BC	1.5	415	BC	7.3	415	BC	8.5	415	BC	3.8	415	BC
10.4	416	BC	5	416	BC	1.6	416	BC	1.3	416	BC	9.9	416	BC	2	416	BC	10.7	416	BC	2	416	BC	1.5	416	BC	7.4	416	BC	8.5	416	BC	3.8	416	BC
10.4	417	BC	5.1	417	BC	1.6	417	BC	1.3	417	BC	9.9	417	BC	2	417	BC	10.8	417	BC	2.1	417	BC	1.5	417	BC	7.4	417	BC	8.5	417	BC	3.8	417	BC
10.4	418	BC	5.1	418	BC	1.6	418	BC	1.3	418	BC	9.9	418	BC	2	418	BC	10.8	418	BC	2.1	418	BC	1.5	418	BC	7.4	418	BC	8.5	418	BC	3.9	418	BC
10.5	419	BC	5.1	419	BC	1.6	419	BC	1.3	419	BC	10	419	BC	2	419	BC	10.8	419	BC	2.1	419	BC	1.5	419	BC	7.4	419	BC	8.5	419	BC	3.9	419	BC
10.5	420	BC	5.1	420	BC	1.6	420	BC	1.3	420	BC	10	420	BC	2	420	BC	10.8	420	BC	2.1	420	BC	1.5	420	BC	7.4	420	BC	8.6	420	BC	3.9	420	BC
10.5	421	BC	5.1	421	BC	1.6	421	BC	1.3	421	BC	10	421	BC	2	421	BC	10.9	421	BC	2.1	421	BC	1.5	421	BC	7.4	421	BC	8.6	421	BC	3.9	421	BC
10.5	422	BC	5.1	422	BC	1.6	422	BC	1.3	422	BC	10.1	422	BC	2	422	BC	10.9	422	BC	2.1	422	BC	1.6	422	BC	7.5	422	BC	8.6	422	BC	3.9	422	BC
10.6	423	BC	5.1	423	BC	1.6	423	BC	1.3	423	BC	10.2	423	BC	2	423	BC	10.9	423	BC	2.1	423	BC	1.6	423	BC	7.5	423	BC	8.6	423	BC	3.9	423	BC
10.6	424	BC	5.1	424	BC	1.6	424	BC	1.3	424	BC	10.2	424	BC	2.1	424	BC	10.9	424	BC	2.1	424	BC	1.6	424	BC	7.5	424	BC	8.7	424	BC	3.9	424	BC
10.6	425	BC	5.2	425	BC	1.6	425	BC	1.3	425	BC	10.2	425	BC	2.1	425	BC	10.9	425	BC	2.1	425	BC	1.6	425	BC	7.5	425	BC	8.7	425	BC	3.9	425	BC
10.6	426	BC	5.2	426	BC	1.6	426	BC	1.4	426	BC	10.2	426	BC	2.1	426	BC	11	426	BC	2.1	426	BC	1.6	426	BC	7.5	426	BC	8.7	426	BC	3.9	426	BC
10.7	427	BC	5.2	427	BC	1.6	427	BC	1.4	427	BC	10.3	427	BC	2.1	427	BC	11	427	BC	2.1	427	BC	1.6	427	BC	7.6	427	BC	8.7	427	BC	3.9	427	BC
10.7	428	BC	5.2	428	BC	1.6	428	BC	1.4	428	BC	10.3	428	BC	2.1	428	BC	11	428	BC	2.1	428	BC	1.6	428	BC	7.6	428	BC	8.8	428	BC	4	428	BC
10.7	429	BC	5.2	429	BC	1.6	429	BC	1.4	429	BC	10.3	429	BC	2.1	429	BC	11	429	BC	2.1	429	BC	1.6	429	BC	7.6	429	BC	8.8	429	BC	4	429	BC
10.7	430	BC	5.2	430	BC	1.6	430	BC	1.4	430	BC	10.4	430	BC	2.1	430	BC	11.1	430	BC	2.1	430	BC	1.6	430	BC	7.7	430	BC	8.8	430	BC	4	430	BC
10.8	431	BC	5.2	431	BC	1.6	431	BC	1.4	431	BC	10.4	431	BC	2.1	431	BC	11.1	431	BC	2.1	431	BC	1.6	431	BC	7.7	431	BC	8.8	431	BC	4	431	BC
10.8	432	BC	5.2	432	BC	1.6	432	BC	1.4	432	BC	10.4	432	BC	2.1	432	BC	11.1	432	BC	2.1	432	BC	1.6	432	BC	7.7	432	BC	8.8	432	BC	4	432	BC
10.8	433	BC	5.3	433	BC	1.6	433	BC	1.4	433	BC	10.5	433	BC	2.1	433	BC	11.2	433	BC	2.2	433	BC	1.6	433	BC	7.7	433	BC	8.9	433	BC	4	433	BC
10.8	434	BC	5.3	434	BC	1.6	434	BC	1.4	434	BC	10.5	434	BC	2.1	434	BC	11.2	434	BC	2.2	434	BC	1.6	434	BC	7.7	434	BC	8.9	434	BC	4	434	BC
10.8	435	BC	5.3	435	BC	1.6	435	BC	1.4	435	BC	10.5	435	BC	2.1	435	BC	11.2	435	BC	2.2	435	BC	1.6	435	BC	7.7	435	BC	8.9	435	BC	4	435	BC
10.9	436	BC	5.3	436	BC	1.6	436	BC	1.4	436	BC	10.5	436	BC	2.1	436	BC	11.3	436	BC	2.2	436	BC	1.6	436	BC	7.8	436	BC	8.9	436	BC	4	436	BC
10.9	437	BC	5.3	437	BC	1.7	437	BC	1.4	437	BC	10.6	437	BC	2.1	437	BC	11.3	437	BC	2.2	437	BC	1.6	437	BC	7.8	437	BC	8.9	437	BC	4	437	BC
10.9	438	BC	5.3	438	BC	1.7	438	BC	1.4	438	BC	10.6	438	BC	2.1	438	BC	11.4	438	BC	2.2	438	BC	1.6	438	BC	7.8	438	BC	9	438	BC	4.1	438	BC
10.9	439	BC	5.3	439	BC	1.7	439	BC	1.4	439	BC	10.6	439	BC	2.1	439	BC	11.4	439	BC	2.2	439	BC	1.6	439	BC	7.8	439	BC	9	439	BC	4.1	439	BC
11	440	BC	5.3	440	BC	1.7	440	BC	1.4	440	BC	10.6	440	BC	2.1	440	BC	11.4	440	BC	2.2	440	BC	1.6	440	BC	7.8	440	BC	9	440	BC	4.1	440	BC
11	441	BC	5.4	441	BC	1.7	441	BC	1.4	441	BC	10.7	441	BC	2.1	441	BC	11.4	441	BC	2.2	441	BC	1.6	441	BC	7.8	441	BC	9	441	BC	4.1	441	BC
11	442	BC	5.4	442	BC	1.7	442	BC	1.4	442	BC	10.7	442	BC	2.2	442	BC	11.5	442	BC	2.2	442	BC	1.6	442	BC	7.9	442	BC	9	442	BC	4.1	442	BC
11	443	BC	5.4	443	BC	1.7	443	BC	1.4	443	BC	10.7	443	BC	2.2	443	BC	11.5	443	BC	2.2	443	BC	1.6	443	BC	7.9	443	BC	9.1	443	BC	4.1	443	BC
11.1	444	BC	5.4	444	BC	1.7	444	BC	1.4	444	BC	10.8	444	BC	2.2	444	BC	11.5	444	BC	2.3	444	BC	1.6	444	BC	7.9	444	BC	9.1	444	BC	4.1	444	BC
11.1	445	BC	5.4	445	BC	1.7	445	BC	1.4	445	BC	10.8	445	BC	2.2	445	BC	11.6	445	BC	2.3	445	BC	1.6	445	BC	7.9	445	BC	9.1	445	BC	4.1	445	BC
11.1	446	BC	5.4	446	BC	1.7	446	BC	1.4	446	BC	10.8	446	BC	2.2	446	BC	11.6	446	BC	2.3	446	BC	1.7	446	BC	7.9	446	BC	9.1	446	BC	4.1	446	BC
11.1	447	BC	5.4	447	BC	1.7	447	BC	1.4	447	BC	10.9	447	BC	2.2	447	BC	11.6	447	BC	2.3	447	BC	1.7	447	BC	8	447	BC	9.1	447	BC	4.2	447	BC
11.2	448	BC	5.4	448	BC	1.7	448	BC	1.4	448	BC	10.9	448	BC	2.2	448	BC	11.7	448	BC	2.3	448	BC	1.7	448	BC	8	448	BC	9.2	448	BC	4.2	448	BC
11.3	449	BC	5.5	449	BC	1.7	449	BC	1.4	449	BC	11	449	BC	2.2	449	BC	11.7	449	BC	2.3	449	BC	1.7	449	BC	8	449	BC	9.2	449	BC	4.2	449	BC
11.4	450	BC	5.5	450	BC	1.7	450	BC	1.4	450	BC	11	450	BC	2.2	450	BC	11.7	450	BC	2.3	450	BC	1.7	450	BC	8	450	BC	9.2	450	BC	4.2	450	BC
11.4	451	BC	5.5	451	BC	1.7	451	BC	1.5	451	BC	11	451	BC	2.2	451	BC	11.8	451	BC	2.3	451	BC	1.7	451	BC	8	451	BC	9.2	451	BC	4.2	451	BC
11.4	452	BC	5.5	452	BC	1.7	452	BC	1.5	452	BC	11.1	452	BC	2.2	452	BC	11.8	452	BC	2.3	452	BC	1.7	452	BC	8	452	BC	9.2	452	BC	4.2	452	BC
11.5	453	BC	5.5	453	BC	1.7	453	BC	1.5	453	BC	11.1	453	BC	2.2	453	BC	11.9	453	BC	2.3	453	BC	1.7	453	BC	8.1	453	BC	9.3	453	BC	4.2	453	BC
11.5	454	BC	5.5	454	BC	1.7	454	BC	1.5	454	BC	11.1	454	BC	2.2	454	BC	11.9	454	BC	2.3	454	BC	1.7	454	BC	8.1	454	BC	9.3	454	BC	4.2	454	BC
11.5	455	BC	5.5	455	BC	1.7	455	BC	1.5	455	BC	11.2	455	BC	2.2	455	BC	11.9	455	BC	2.3	455	BC	1.7	455	BC	8.1	455	BC	9.3	455	BC	4.2	455	BC
11.5	456	BC	5.5	456	BC	1.7	456	BC	1.5	456	BC	11.2	456	BC	2.2	456	BC	12	456	BC	2.3	456	BC	1.7	456	BC	8.1	456	BC	9.4	456	BC	4.3	456	BC
11.6	457	BC	5.5	457	BC	1.7	457	BC	1.5	457	BC	11.2	457	BC	2.2	457	BC	12.1	457	BC	2.3	457	BC	1.7	457	BC	8.1	457	BC	9.4	457	BC	4.3	457	BC
11.6	458	BC	5.6	458	BC	1.7	458	BC	1.5	458	BC	11.3	458	BC	2.2	458	BC	12.1	458	BC	2.3	458	BC	1.7	458	BC	8.2	458	BC	9.4	458	BC	4.3	458	BC
11.6	459	BC	5.6	459	BC	1.8	459	BC	1.5	459	BC	11.3	459	BC	2.2	459	BC	12.2	459	BC	2.4	459	BC	1.7	459	BC	8.2	459	BC	9.4	459	BC	4.3	459	BC
11.7	460	BC	5.6	460	BC	1.8	460	BC	1.5	460	BC	11.3	460	BC	2.2	460	BC	12.2	460	BC	2.4	460	BC	1.7	460	BC	8.2	460	BC	9.5	460	BC	4.3	460	BC
11.7	461	BC	5.6	461	BC	1.8	461	BC	1.5	461	BC	11.4	461	BC	2.3	461	BC	12.3	461	BC	2.4	461	BC	1.7	461	BC	8.2	461	BC	9.5	461	BC	4.3	461	BC
11.7	462	BC	5.6	462	BC	1.8	462	BC	1.5	462	BC	11.4	462	BC	2.3	462	BC	12.3	462	BC	2.4	462	BC	1.7	462	BC	8.2	462	BC	9.5	462	BC	4.3	462	BC
11.7	463	BC	5.6	463	BC	1.8	463	BC	1.5	463	BC	11.4	463	BC	2.3	463	BC	12.4	463	BC	2.4	463	BC	1.7	463	BC	8.3	463	BC	9.5	463	BC	4.3	463	BC
11.8	464	BC	5.6	464	BC	1.8	464	BC	1.5	464	BC	11.4	464	BC	2.3	464	BC	12.5	464	BC	2.4	464	BC	1.7	464	BC	8.3	464	BC	9.5	464	BC	4.4	464	BC
11.8	465	BC	5.6	465	BC	1.8	465	BC	1.5	465	BC	11.5	465	BC	2.3	465	BC	12.5	465	BC	2.4	465	BC	1.8	465	BC	8.3	465	BC	9.6	465	BC	4.4	465	BC
11.8	466	BC	5.7	466	BC	1.8	466	BC	1.5	466	BC	11.5	466	BC	2.3	466	BC	12.5	466	BC	2.4	466	BC	1.8	466	BC	8.3	466	BC	9.6	466	BC	4.4	466	BC
11.9	467	BC	5.7	467	BC	1.8	467	BC	1.5	467	BC	11.6	467	BC	2.3	467	BC	12.6	467	BC	2.4	467	BC	1.8	467	BC	8.3	467	BC	9.6	467	BC	4.4	467	BC
11.9	468	BC	5.7	468	BC	1.8	468	BC	1.5	468	BC	11.6	468	BC	2.3	468	BC	12.6	468	BC	2.4	468	BC	1.8	468	BC	8.4	468	BC	9.6	468	BC	4.4	468	BC
11.9	469	BC	5.7	469	BC	1.8	469	BC	1.5	469	BC	11.6	469	BC	2.3	469	BC	12.7	469	BC	2.5	469	BC	1.8	469	BC	8.4	469	BC	9.6	469	BC	4.4	469	BC
12	470	BC	5.7	470	BC	1.8	470	BC	1.5	470	BC	11.6	470	BC	2.3	470	BC	12.7	470	BC	2.5	470	BC	1.8	470	BC	8.4	470	BC	9.7	470	BC	4.4	470	BC
12	471	BC	5.8	471	BC	1.8	471	BC	1.5	471	BC	11.7	471	BC	2.3	471	BC	12.7	471	BC	2.5	471	BC	1.8	471	BC	8.4	471	BC	9.7	471	BC	4.4	471	BC
12	472	BC	5.8	472	BC	1.8	472	BC	1.5	472	BC	11.7	472	BC	2.3	472	BC	12.7	472	BC	2.5	472	BC	1.8	472	BC	8.4	472	BC	9.7	472	BC	4.4	472	BC
12	473	BC	5.8	473	BC	1.8	473	BC	1.5	473	BC	11.7	473	BC	2.3	473	BC	12.7	473	BC	2.5	473	BC	1.8	473	BC	8.5	473	BC	9.7	473	BC	4.4	473	BC
12	474	BC	5.8	474	BC	1.8	474	BC	1.5	474	BC	11.7	474	BC	2.3	474	BC	12.8	474	BC	2.5	474	BC	1.8	474	BC	8.5	474	BC	9.7	474	BC	4.5	474	BC
12.1	475	BC	5.8	475	BC	1.8	475	BC	1.6	475	BC	11.8	475	BC	2.3	475	BC	12.8	475	BC	2.5	475	BC	1.8	475	BC	8.5	475	BC	9.8	475	BC	4.5	475	BC
12.1	476	BC	5.8	476	BC	1.8	476	BC	1.6	476	BC	11.8	476	BC	2.3	476	BC	12.9	476	BC	2.5	476	BC	1.8	476	BC	8.5	476	BC	9.8	476	BC	4.5	476	BC
12.1	477	BC	5.8	477	BC	1.8	477	BC	1.6	477	BC	11.8	477	BC	2.3	477	BC	12.9	477	BC	2.5	477	BC	1.8	477	BC	8.5	477	BC	9.8	477	BC	4.5	477	BC
12.1	478	BC	5.8	478	BC	1.8	478	BC	1.6	478	BC	11.9	478	BC	2.3	478	BC	12.9	478	BC	2.5	478	BC	1.8	478	BC	8.6	478	BC	9.8	478	BC	4.5	478	BC
12.2	479	BC	5.9	479	BC	1.8	479	BC	1.6	479	BC	11.9	479	BC	2.4	479	BC	12.9	479	BC	2.5	479	BC	1.8	479	BC	8.6	479	BC	9.8	479	BC	4.5	479	BC
12.2	480	BC	5.9	480	BC	1.8	480	BC	1.6	480	BC	11.9	480	BC	2.4	480	BC	13	480	BC	2.6	480	BC	1.8	480	BC	8.6	480	BC	9.9	480	BC	4.5	480	BC
12.2	481	BC	5.9	481	BC	1.8	481	BC	1.6	481	BC	11.9	481	BC	2.4	481	BC	13	481	BC	2.6	481	BC	1.8	481	BC	8.6	481	BC	9.9	481	BC	4.5	481	BC
12.2	482	BC	5.9	482	BC	1.8	482	BC	1.6	482	BC	12	482	BC	2.4	482	BC	13	482	BC	2.6	482	BC	1.8	482	BC	8.6	482	BC	9.9	482	BC	4.5	482	BC
12.3	483	BC	5.9	483	BC	1.8	483	BC	1.6	483	BC	12	483	BC	2.4	483	BC	13.1	483	BC	2.6	483	BC	1.9	483	BC	8.6	483	BC	9.9	483	BC	4.5	483	BC
12.3	484	BC	5.9	484	BC	1.8	484	BC	1.6	484	BC	12	484	BC	2.4	484	BC	13.2	484	BC	2.6	484	BC	1.9	484	BC	8.7	484	BC	9.9	484	BC	4.5	484	BC
12.3	485	BC	5.9	485	BC	1.8	485	BC	1.6	485	BC	12.1	485	BC	2.4	485	BC	13.2	485	BC	2.6	485	BC	1.9	485	BC	8.7	485	BC	10	485	BC	4.5	485	BC
12.3	486	BC	5.9	486	BC	1.9	486	BC	1.6	486	BC	12.2	486	BC	2.4	486	BC	13.3	486	BC	2.6	486	BC	1.9	486	BC	8.7	486	BC	10	486	BC	4.6	486	BC
12.4	487	BC	6	487	BC	1.9	487	BC	1.6	487	BC	12.2	487	BC	2.4	487	BC	13.3	487	BC	2.6	487	BC	1.9	487	BC	8.7	487	BC	10	487	BC	4.6	487	BC
12.4	488	BC	6	488	BC	1.9	488	BC	1.6	488	BC	12.2	488	BC	2.4	488	BC	13.3	488	BC	2.6	488	BC	1.9	488	BC	8.8	488	BC	10	488	BC	4.6	488	BC
12.4	489	BC	6	489	BC	1.9	489	BC	1.6	489	BC	12.3	489	BC	2.4	489	BC	13.4	489	BC	2.6	489	BC	1.9	489	BC	8.8	489	BC	10	489	BC	4.6	489	BC
12.5	490	BC	6	490	BC	1.9	490	BC	1.6	490	BC	12.3	490	BC	2.4	490	BC	13.4	490	BC	2.6	490	BC	1.9	490	BC	8.8	490	BC	10.1	490	BC	4.6	490	BC
12.5	491	BC	6	491	BC	1.9	491	BC	1.6	491	BC	12.3	491	BC	2.4	491	BC	13.4	491	BC	2.6	491	BC	1.9	491	BC	8.8	491	BC	10.1	491	BC	4.6	491	BC
12.5	492	BC	6	492	BC	1.9	492	BC	1.6	492	BC	12.4	492	BC	2.4	492	BC	13.4	492	BC	2.6	492	BC	1.9	492	BC	8.8	492	BC	10.1	492	BC	4.6	492	BC
12.5	493	BC	6	493	BC	1.9	493	BC	1.6	493	BC	12.4	493	BC	2.4	493	BC	13.5	493	BC	2.6	493	BC	1.9	493	BC	8.9	493	BC	10.1	493	BC	4.7	493	BC
12.6	494	BC	6	494	BC	1.9	494	BC	1.6	494	BC	12.5	494	BC	2.4	494	BC	13.5	494	BC	2.6	494	BC	1.9	494	BC	8.9	494	BC	10.1	494	BC	4.7	494	BC
12.6	495	BC	6.1	495	BC	1.9	495	BC	1.6	495	BC	12.5	495	BC	2.4	495	BC	13.6	495	BC	2.7	495	BC	1.9	495	BC	8.9	495	BC	10.2	495	BC	4.7	495	BC
12.6	496	BC	6.1	496	BC	1.9	496	BC	1.6	496	BC	12.5	496	BC	2.5	496	BC	13.7	496	BC	2.7	496	BC	1.9	496	BC	8.9	496	BC	10.2	496	BC	4.7	496	BC
12.6	497	BC	6.1	497	BC	1.9	497	BC	1.7	497	BC	12.6	497	BC	2.5	497	BC	13.8	497	BC	2.7	497	BC	1.9	497	BC	8.9	497	BC	10.2	497	BC	4.7	497	BC
12.7	498	BC	6.1	498	BC	1.9	498	BC	1.7	498	BC	12.6	498	BC	2.5	498	BC	13.8	498	BC	2.7	498	BC	2	498	BC	9	498	BC	10.2	498	BC	4.7	498	BC
12.7	499	BC	6.1	499	BC	1.9	499	BC	1.7	499	BC	12.6	499	BC	2.5	499	BC	13.8	499	BC	2.7	499	BC	2	499	BC	9	499	BC	10.2	499	BC	4.7	499	BC
12.7	500	BC	6.1	500	BC	1.9	500	BC	1.7	500	BC	12.7	500	BC	2.5	500	BC	13.9	500	BC	2.7	500	BC	2	500	BC	9	500	BC	10.3	500	BC	4.7	500	BC
12.7	501	BC	6.1	501	BC	1.9	501	BC	1.7	501	BC	12.8	501	BC	2.5	501	BC	13.9	501	BC	2.7	501	BC	2	501	BC	9	501	BC	10.3	501	BC	4.7	501	BC
12.7	502	BC	6.1	502	BC	1.9	502	BC	1.7	502	BC	12.8	502	BC	2.5	502	BC	14	502	BC	2.7	502	BC	2	502	BC	9.1	502	BC	10.3	502	BC	4.8	502	BC
12.8	503	BC	6.2	503	BC	1.9	503	BC	1.7	503	BC	12.8	503	BC	2.5	503	BC	14	503	BC	2.7	503	BC	2	503	BC	9.1	503	BC	10.3	503	BC	4.8	503	BC
12.8	504	BC	6.2	504	BC	1.9	504	BC	1.7	504	BC	12.9	504	BC	2.5	504	BC	14.1	504	BC	2.8	504	BC	2	504	BC	9.1	504	BC	10.3	504	BC	4.8	504	BC
12.8	505	BC	6.2	505	BC	1.9	505	BC	1.7	505	BC	12.9	505	BC	2.5	505	BC	14.1	505	BC	2.8	505	BC	2	505	BC	9.1	505	BC	10.4	505	BC	4.8	505	BC
12.8	506	BC	6.2	506	BC	1.9	506	BC	1.7	506	BC	13	506	BC	2.5	506	BC	14.2	506	BC	2.8	506	BC	2	506	BC	9.1	506	BC	10.4	506	BC	4.8	506	BC
12.9	507	BC	6.2	507	BC	1.9	507	BC	1.7	507	BC	13	507	BC	2.5	507	BC	14.3	507	BC	2.8	507	BC	2	507	BC	9.2	507	BC	10.4	507	BC	4.8	507	BC
12.9	508	BC	6.2	508	BC	1.9	508	BC	1.7	508	BC	13.1	508	BC	2.5	508	BC	14.3	508	BC	2.8	508	BC	2	508	BC	9.2	508	BC	10.4	508	BC	4.8	508	BC
12.9	509	BC	6.2	509	BC	1.9	509	BC	1.7	509	BC	13.1	509	BC	2.5	509	BC	14.3	509	BC	2.8	509	BC	2	509	BC	9.2	509	BC	10.4	509	BC	4.9	509	BC
13	510	BC	6.3	510	BC	2	510	BC	1.7	510	BC	13.1	510	BC	2.5	510	BC	14.4	510	BC	2.8	510	BC	2	510	BC	9.2	510	BC	10.5	510	BC	4.9	510	BC
13	511	BC	6.3	511	BC	2	511	BC	1.7	511	BC	13.1	511	BC	2.5	511	BC	14.5	511	BC	2.8	511	BC	2	511	BC	9.3	511	BC	10.5	511	BC	4.9	511	BC
13	512	BC	6.3	512	BC	2	512	BC	1.7	512	BC	13.2	512	BC	2.5	512	BC	14.5	512	BC	2.8	512	BC	2	512	BC	9.3	512	BC	10.5	512	BC	4.9	512	BC
13	513	BC	6.3	513	BC	2	513	BC	1.7	513	BC	13.2	513	BC	2.6	513	BC	14.5	513	BC	2.8	513	BC	2.1	513	BC	9.3	513	BC	10.5	513	BC	4.9	513	BC
13.1	514	BC	6.3	514	BC	2	514	BC	1.7	514	BC	13.2	514	BC	2.6	514	BC	14.5	514	BC	2.9	514	BC	2.1	514	BC	9.3	514	BC	10.5	514	BC	4.9	514	BC
13.1	515	BC	6.3	515	BC	2	515	BC	1.7	515	BC	13.2	515	BC	2.6	515	BC	14.6	515	BC	2.9	515	BC	2.1	515	BC	9.3	515	BC	10.6	515	BC	4.9	515	BC
13.1	516	BC	6.3	516	BC	2	516	BC	1.7	516	BC	13.3	516	BC	2.6	516	BC	14.6	516	BC	2.9	516	BC	2.1	516	BC	9.4	516	BC	10.6	516	BC	4.9	516	BC
13.1	517	BC	6.3	517	BC	2	517	BC	1.7	517	BC	13.3	517	BC	2.6	517	BC	14.7	517	BC	2.9	517	BC	2.1	517	BC	9.4	517	BC	10.6	517	BC	4.9	517	BC
13.2	518	BC	6.3	518	BC	2	518	BC	1.7	518	BC	13.3	518	BC	2.6	518	BC	14.8	518	BC	2.9	518	BC	2.1	518	BC	9.4	518	BC	10.6	518	BC	5	518	BC
13.2	519	BC	6.4	519	BC	2	519	BC	1.7	519	BC	13.3	519	BC	2.6	519	BC	14.8	519	BC	2.9	519	BC	2.1	519	BC	9.4	519	BC	10.6	519	BC	5	519	BC
13.2	520	BC	6.4	520	BC	2	520	BC	1.7	520	BC	13.4	520	BC	2.6	520	BC	14.9	520	BC	2.9	520	BC	2.1	520	BC	9.4	520	BC	10.7	520	BC	5	520	BC
13.2	521	BC	6.4	521	BC	2	521	BC	1.7	521	BC	13.5	521	BC	2.6	521	BC	15	521	BC	2.9	521	BC	2.1	521	BC	9.5	521	BC	10.7	521	BC	5	521	BC
13.3	522	BC	6.4	522	BC	2	522	BC	1.8	522	BC	13.5	522	BC	2.6	522	BC	15.1	522	BC	2.9	522	BC	2.1	522	BC	9.5	522	BC	10.7	522	BC	5	522	BC
13.3	523	BC	6.4	523	BC	2	523	BC	1.8	523	BC	13.6	523	BC	2.6	523	BC	15.2	523	BC	2.9	523	BC	2.1	523	BC	9.5	523	BC	10.7	523	BC	5	523	BC
13.3	524	BC	6.4	524	BC	2	524	BC	1.8	524	BC	13.6	524	BC	2.6	524	BC	15.3	524	BC	2.9	524	BC	2.1	524	BC	9.5	524	BC	10.7	524	BC	5	524	BC
13.3	525	BC	6.4	525	BC	2	525	BC	1.8	525	BC	13.6	525	BC	2.6	525	BC	15.3	525	BC	2.9	525	BC	2.1	525	BC	9.5	525	BC	10.8	525	BC	5.1	525	BC
13.3	526	BC	6.4	526	BC	2	526	BC	1.8	526	BC	13.7	526	BC	2.6	526	BC	15.4	526	BC	2.9	526	BC	2.2	526	BC	9.6	526	BC	10.8	526	BC	5.1	526	BC
13.4	527	BC	6.4	527	BC	2	527	BC	1.8	527	BC	13.7	527	BC	2.7	527	BC	15.4	527	BC	2.9	527	BC	2.2	527	BC	9.6	527	BC	10.8	527	BC	5.1	527	BC
13.4	528	BC	6.5	528	BC	2	528	BC	1.8	528	BC	13.7	528	BC	2.7	528	BC	15.4	528	BC	2.9	528	BC	2.2	528	BC	9.6	528	BC	10.8	528	BC	5.1	528	BC
13.4	529	BC	6.5	529	BC	2	529	BC	1.8	529	BC	13.8	529	BC	2.7	529	BC	15.6	529	BC	2.9	529	BC	2.2	529	BC	9.6	529	BC	10.9	529	BC	5.1	529	BC
13.4	530	BC	6.5	530	BC	2	530	BC	1.8	530	BC	13.9	530	BC	2.7	530	BC	15.7	530	BC	2.9	530	BC	2.2	530	BC	9.6	530	BC	10.9	530	BC	5.1	530	BC
13.6	531	BC	6.5	531	BC	2	531	BC	1.8	531	BC	13.9	531	BC	2.7	531	BC	15.7	531	BC	3	531	BC	2.2	531	BC	9.7	531	BC	10.9	531	BC	5.2	531	BC
13.6	532	BC	6.5	532	BC	2	532	BC	1.8	532	BC	13.9	532	BC	2.7	532	BC	15.7	532	BC	3	532	BC	2.2	532	BC	9.7	532	BC	10.9	532	BC	5.2	532	BC
13.7	533	BC	6.5	533	BC	2	533	BC	1.8	533	BC	14	533	BC	2.7	533	BC	15.8	533	BC	3	533	BC	2.2	533	BC	9.7	533	BC	10.9	533	BC	5.2	533	BC
13.7	534	BC	6.5	534	BC	2	534	BC	1.8	534	BC	14	534	BC	2.7	534	BC	15.8	534	BC	3	534	BC	2.2	534	BC	9.7	534	BC	11	534	BC	5.2	534	BC
13.7	535	BC	6.6	535	BC	2.1	535	BC	1.8	535	BC	14.1	535	BC	2.7	535	BC	15.9	535	BC	3	535	BC	2.2	535	BC	9.7	535	BC	11	535	BC	5.2	535	BC
13.7	536	BC	6.6	536	BC	2.1	536	BC	1.8	536	BC	14.1	536	BC	2.7	536	BC	15.9	536	BC	3	536	BC	2.2	536	BC	9.7	536	BC	11	536	BC	5.2	536	BC
13.8	537	BC	6.6	537	BC	2.1	537	BC	1.8	537	BC	14.1	537	BC	2.7	537	BC	16	537	BC	3	537	BC	2.2	537	BC	9.8	537	BC	11	537	BC	5.2	537	BC
13.8	538	BC	6.6	538	BC	2.1	538	BC	1.8	538	BC	14.3	538	BC	2.8	538	BC	16.1	538	BC	3	538	BC	2.2	538	BC	9.8	538	BC	11.1	538	BC	5.2	538	BC
13.8	539	BC	6.6	539	BC	2.1	539	BC	1.9	539	BC	14.4	539	BC	2.8	539	BC	16.1	539	BC	3	539	BC	2.2	539	BC	9.8	539	BC	11.1	539	BC	5.2	539	BC
13.8	540	BC	6.6	540	BC	2.1	540	BC	1.9	540	BC	14.4	540	BC	2.8	540	BC	16.2	540	BC	3	540	BC	2.3	540	BC	9.8	540	BC	11.1	540	BC	5.3	540	BC
13.9	541	BC	6.6	541	BC	2.1	541	BC	1.9	541	BC	14.5	541	BC	2.8	541	BC	16.3	541	BC	3	541	BC	2.3	541	BC	9.9	541	BC	11.1	541	BC	5.3	541	BC
13.9	542	BC	6.6	542	BC	2.1	542	BC	1.9	542	BC	14.5	542	BC	2.8	542	BC	16.3	542	BC	3	542	BC	2.3	542	BC	9.9	542	BC	11.1	542	BC	5.3	542	BC
13.9	543	BC	6.7	543	BC	2.1	543	BC	1.9	543	BC	14.6	543	BC	2.8	543	BC	16.3	543	BC	3	543	BC	2.3	543	BC	9.9	543	BC	11.2	543	BC	5.3	543	BC
13.9	544	BC	6.7	544	BC	2.1	544	BC	1.9	544	BC	14.6	544	BC	2.8	544	BC	16.4	544	BC	3.1	544	BC	2.3	544	BC	9.9	544	BC	11.2	544	BC	5.3	544	BC
13.9	545	BC	6.7	545	BC	2.1	545	BC	1.9	545	BC	14.6	545	BC	2.8	545	BC	16.4	545	BC	3.1	545	BC	2.3	545	BC	9.9	545	BC	11.2	545	BC	5.3	545	BC
14	546	BC	6.7	546	BC	2.1	546	BC	1.9	546	BC	14.7	546	BC	2.8	546	BC	16.5	546	BC	3.1	546	BC	2.3	546	BC	9.9	546	BC	11.2	546	BC	5.3	546	BC
14	547	BC	6.7	547	BC	2.1	547	BC	1.9	547	BC	14.8	547	BC	2.8	547	BC	16.5	547	BC	3.1	547	BC	2.3	547	BC	10	547	BC	11.3	547	BC	5.3	547	BC
14	548	BC	6.7	548	BC	2.1	548	BC	1.9	548	BC	14.8	548	BC	2.8	548	BC	16.6	548	BC	3.1	548	BC	2.3	548	BC	10	548	BC	11.3	548	BC	5.4	548	BC
14	549	BC	6.7	549	BC	2.1	549	BC	1.9	549	BC	14.8	549	BC	2.8	549	BC	16.6	549	BC	3.1	549	BC	2.3	549	BC	10	549	BC	11.3	549	BC	5.4	549	BC
14.1	550	BC	6.7	550	BC	2.1	550	BC	1.9	550	BC	14.9	550	BC	2.8	550	BC	16.8	550	BC	3.1	550	BC	2.3	550	BC	10	550	BC	11.3	550	BC	5.4	550	BC
14.1	551	BC	6.7	551	BC	2.1	551	BC	1.9	551	BC	15	551	BC	2.8	551	BC	16.9	551	BC	3.1	551	BC	2.3	551	BC	10.1	551	BC	11.4	551	BC	5.4	551	BC
14.1	552	BC	6.8	552	BC	2.1	552	BC	1.9	552	BC	15.1	552	BC	2.8	552	BC	17.1	552	BC	3.1	552	BC	2.3	552	BC	10.1	552	BC	11.4	552	BC	5.4	552	BC
14.2	553	BC	6.8	553	BC	2.1	553	BC	1.9	553	BC	15.2	553	BC	2.8	553	BC	17.4	553	BC	3.1	553	BC	2.4	553	BC	10.1	553	BC	11.4	553	BC	5.4	553	BC
14.2	554	BC	6.8	554	BC	2.1	554	BC	1.9	554	BC	15.3	554	BC	2.8	554	BC	17.5	554	BC	3.1	554	BC	2.4	554	BC	10.1	554	BC	11.4	554	BC	5.5	554	BC
14.2	555	BC	6.8	555	BC	2.1	555	BC	1.9	555	BC	15.4	555	BC	2.8	555	BC	17.6	555	BC	3.2	555	BC	2.4	555	BC	10.1	555	BC	11.4	555	BC	5.5	555	BC
14.2	556	BC	6.8	556	BC	2.1	556	BC	1.9	556	BC	15.4	556	BC	2.9	556	BC	17.6	556	BC	3.2	556	BC	2.4	556	BC	10.2	556	BC	11.5	556	BC	5.5	556	BC
14.3	557	BC	6.8	557	BC	2.1	557	BC	1.9	557	BC	15.5	557	BC	2.9	557	BC	17.7	557	BC	3.2	557	BC	2.4	557	BC	10.2	557	BC	11.5	557	BC	5.5	557	BC
14.3	558	BC	6.8	558	BC	2.1	558	BC	1.9	558	BC	15.6	558	BC	2.9	558	BC	17.7	558	BC	3.2	558	BC	2.4	558	BC	10.2	558	BC	11.5	558	BC	5.5	558	BC
14.3	559	BC	6.8	559	BC	2.2	559	BC	2	559	BC	15.7	559	BC	2.9	559	BC	17.7	559	BC	3.2	559	BC	2.4	559	BC	10.2	559	BC	11.5	559	BC	5.5	559	BC
14.4	560	BC	6.9	560	BC	2.2	560	BC	2	560	BC	15.8	560	BC	2.9	560	BC	17.8	560	BC	3.2	560	BC	2.4	560	BC	10.2	560	BC	11.5	560	BC	5.5	560	BC
14.4	561	BC	6.9	561	BC	2.2	561	BC	2	561	BC	15.9	561	BC	2.9	561	BC	17.8	561	BC	3.2	561	BC	2.4	561	BC	10.3	561	BC	11.6	561	BC	5.5	561	BC
14.4	562	BC	6.9	562	BC	2.2	562	BC	2	562	BC	16	562	BC	2.9	562	BC	17.9	562	BC	3.2	562	BC	2.4	562	BC	10.3	562	BC	11.6	562	BC	5.5	562	BC
14.4	563	BC	6.9	563	BC	2.2	563	BC	2	563	BC	16	563	BC	2.9	563	BC	17.9	563	BC	3.2	563	BC	2.4	563	BC	10.3	563	BC	11.6	563	BC	5.6	563	BC
14.5	564	BC	6.9	564	BC	2.2	564	BC	2	564	BC	16.1	564	BC	2.9	564	BC	18	564	BC	3.2	564	BC	2.4	564	BC	10.3	564	BC	11.6	564	BC	5.6	564	BC
14.5	565	BC	6.9	565	BC	2.2	565	BC	2	565	BC	16.1	565	BC	2.9	565	BC	18	565	BC	3.3	565	BC	2.4	565	BC	10.3	565	BC	11.7	565	BC	5.6	565	BC
14.5	566	BC	7	566	BC	2.2	566	BC	2	566	BC	16.2	566	BC	2.9	566	BC	18	566	BC	3.3	566	BC	2.4	566	BC	10.4	566	BC	11.7	566	BC	5.6	566	BC
14.6	567	BC	7	567	BC	2.2	567	BC	2	567	BC	16.2	567	BC	2.9	567	BC	18.1	567	BC	3.3	567	BC	2.4	567	BC	10.4	567	BC	11.7	567	BC	5.6	567	BC
14.6	568	BC	7	568	BC	2.2	568	BC	2	568	BC	16.3	568	BC	2.9	568	BC	18.1	568	BC	3.3	568	BC	2.4	568	BC	10.4	568	BC	11.7	568	BC	5.6	568	BC
14.6	569	BC	7	569	BC	2.2	569	BC	2	569	BC	16.3	569	BC	2.9	569	BC	18.2	569	BC	3.3	569	BC	2.5	569	BC	10.4	569	BC	11.7	569	BC	5.6	569	BC
14.6	570	BC	7	570	BC	2.2	570	BC	2	570	BC	16.3	570	BC	3	570	BC	18.2	570	BC	3.3	570	BC	2.5	570	BC	10.5	570	BC	11.8	570	BC	5.6	570	BC
14.6	571	BC	7	571	BC	2.2	571	BC	2	571	BC	16.4	571	BC	3	571	BC	18.2	571	BC	3.3	571	BC	2.5	571	BC	10.5	571	BC	11.8	571	BC	5.7	571	BC
14.7	572	BC	7.1	572	BC	2.2	572	BC	2	572	BC	16.4	572	BC	3	572	BC	18.2	572	BC	3.3	572	BC	2.5	572	BC	10.5	572	BC	11.8	572	BC	5.7	572	BC
14.7	573	BC	7.1	573	BC	2.2	573	BC	2	573	BC	16.4	573	BC	3	573	BC	18.3	573	BC	3.3	573	BC	2.5	573	BC	10.5	573	BC	11.8	573	BC	5.7	573	BC
14.7	574	BC	7.1	574	BC	2.2	574	BC	2	574	BC	16.4	574	BC	3	574	BC	18.3	574	BC	3.3	574	BC	2.5	574	BC	10.5	574	BC	11.8	574	BC	5.7	574	BC
14.7	575	BC	7.1	575	BC	2.2	575	BC	2	575	BC	16.5	575	BC	3	575	BC	18.3	575	BC	3.3	575	BC	2.5	575	BC	10.6	575	BC	11.9	575	BC	5.7	575	BC
14.8	576	BC	7.1	576	BC	2.2	576	BC	2	576	BC	16.5	576	BC	3	576	BC	18.4	576	BC	3.3	576	BC	2.5	576	BC	10.6	576	BC	11.9	576	BC	5.7	576	BC
14.8	577	BC	7.1	577	BC	2.2	577	BC	2	577	BC	16.6	577	BC	3	577	BC	18.4	577	BC	3.4	577	BC	2.5	577	BC	10.6	577	BC	11.9	577	BC	5.7	577	BC
14.8	578	BC	7.1	578	BC	2.2	578	BC	2.1	578	BC	16.6	578	BC	3	578	BC	18.4	578	BC	3.4	578	BC	2.5	578	BC	10.6	578	BC	11.9	578	BC	5.7	578	BC
14.8	579	BC	7.1	579	BC	2.2	579	BC	2.1	579	BC	16.6	579	BC	3	579	BC	18.5	579	BC	3.4	579	BC	2.5	579	BC	10.7	579	BC	11.9	579	BC	5.8	579	BC
14.9	580	BC	7.2	580	BC	2.2	580	BC	2.1	580	BC	16.6	580	BC	3	580	BC	18.5	580	BC	3.4	580	BC	2.5	580	BC	10.7	580	BC	12	580	BC	5.8	580	BC
14.9	581	BC	7.2	581	BC	2.2	581	BC	2.1	581	BC	16.7	581	BC	3	581	BC	18.6	581	BC	3.4	581	BC	2.5	581	BC	10.7	581	BC	12	581	BC	5.8	581	BC
14.9	582	BC	7.2	582	BC	2.2	582	BC	2.1	582	BC	16.7	582	BC	3	582	BC	18.6	582	BC	3.4	582	BC	2.5	582	BC	10.7	582	BC	12	582	BC	5.8	582	BC
14.9	583	BC	7.2	583	BC	2.3	583	BC	2.1	583	BC	16.7	583	BC	3	583	BC	18.7	583	BC	3.4	583	BC	2.6	583	BC	10.7	583	BC	12	583	BC	5.8	583	BC
15	584	BC	7.2	584	BC	2.3	584	BC	2.1	584	BC	16.7	584	BC	3	584	BC	18.7	584	BC	3.4	584	BC	2.6	584	BC	10.7	584	BC	12.1	584	BC	5.8	584	BC
15	585	BC	7.2	585	BC	2.3	585	BC	2.1	585	BC	16.8	585	BC	3	585	BC	18.8	585	BC	3.4	585	BC	2.6	585	BC	10.8	585	BC	12.1	585	BC	5.8	585	BC
15	586	BC	7.2	586	BC	2.3	586	BC	2.1	586	BC	16.8	586	BC	3	586	BC	18.8	586	BC	3.5	586	BC	2.6	586	BC	10.8	586	BC	12.1	586	BC	5.9	586	BC
15	587	BC	7.2	587	BC	2.3	587	BC	2.1	587	BC	16.8	587	BC	3	587	BC	18.9	587	BC	3.5	587	BC	2.6	587	BC	10.8	587	BC	12.1	587	BC	5.9	587	BC
15.1	588	BC	7.3	588	BC	2.3	588	BC	2.1	588	BC	16.8	588	BC	3	588	BC	18.9	588	BC	3.5	588	BC	2.6	588	BC	10.8	588	BC	12.1	588	BC	5.9	588	BC
15.1	589	BC	7.3	589	BC	2.3	589	BC	2.1	589	BC	16.9	589	BC	3	589	BC	18.9	589	BC	3.5	589	BC	2.6	589	BC	10.8	589	BC	12.2	589	BC	5.9	589	BC
15.1	590	BC	7.3	590	BC	2.3	590	BC	2.1	590	BC	16.9	590	BC	3.1	590	BC	19	590	BC	3.5	590	BC	2.6	590	BC	10.9	590	BC	12.2	590	BC	5.9	590	BC
15.1	591	BC	7.3	591	BC	2.3	591	BC	2.1	591	BC	17	591	BC	3.1	591	BC	19	591	BC	3.5	591	BC	2.6	591	BC	10.9	591	BC	12.2	591	BC	5.9	591	BC
15.2	592	BC	7.3	592	BC	2.3	592	BC	2.1	592	BC	17	592	BC	3.1	592	BC	19.1	592	BC	3.5	592	BC	2.6	592	BC	10.9	592	BC	12.2	592	BC	5.9	592	BC
15.2	593	BC	7.3	593	BC	2.3	593	BC	2.1	593	BC	17.1	593	BC	3.1	593	BC	19.1	593	BC	3.5	593	BC	2.6	593	BC	11	593	BC	12.2	593	BC	6	593	BC
15.2	594	BC	7.3	594	BC	2.3	594	BC	2.1	594	BC	17.1	594	BC	3.1	594	BC	19.2	594	BC	3.5	594	BC	2.6	594	BC	11	594	BC	12.3	594	BC	6	594	BC
15.3	595	BC	7.4	595	BC	2.3	595	BC	2.1	595	BC	17.1	595	BC	3.1	595	BC	19.2	595	BC	3.5	595	BC	2.6	595	BC	11	595	BC	12.3	595	BC	6	595	BC
15.3	596	BC	7.4	596	BC	2.3	596	BC	2.1	596	BC	17.2	596	BC	3.1	596	BC	19.3	596	BC	3.6	596	BC	2.7	596	BC	11	596	BC	12.3	596	BC	6	596	BC
15.3	597	BC	7.4	597	BC	2.3	597	BC	2.1	597	BC	17.2	597	BC	3.1	597	BC	19.3	597	BC	3.6	597	BC	2.7	597	BC	11.1	597	BC	12.3	597	BC	6	597	BC
15.3	598	BC	7.4	598	BC	2.3	598	BC	2.1	598	BC	17.3	598	BC	3.1	598	BC	19.4	598	BC	3.6	598	BC	2.7	598	BC	11.1	598	BC	12.3	598	BC	6	598	BC
15.4	599	BC	7.4	599	BC	2.3	599	BC	2.1	599	BC	17.3	599	BC	3.1	599	BC	19.4	599	BC	3.6	599	BC	2.7	599	BC	11.1	599	BC	12.4	599	BC	6	599	BC
15.4	600	BC	7.4	600	BC	2.3	600	BC	2.1	600	BC	17.3	600	BC	3.1	600	BC	19.4	600	BC	3.6	600	BC	2.7	600	BC	11.1	600	BC	12.4	600	BC	6.1	600	BC
15.5	601	BC	7.4	601	BC	2.3	601	BC	2.1	601	BC	17.3	601	BC	3.1	601	BC	19.5	601	BC	3.6	601	BC	2.7	601	BC	11.2	601	BC	12.4	601	BC	6.1	601	BC
15.5	602	BC	7.4	602	BC	2.3	602	BC	2.2	602	BC	17.4	602	BC	3.1	602	BC	19.5	602	BC	3.6	602	BC	2.7	602	BC	11.2	602	BC	12.4	602	BC	6.1	602	BC
15.6	603	BC	7.5	603	BC	2.3	603	BC	2.2	603	BC	17.4	603	BC	3.2	603	BC	19.6	603	BC	3.6	603	BC	2.7	603	BC	11.3	603	BC	12.4	603	BC	6.1	603	BC
16	604	BC	7.5	604	BC	2.3	604	BC	2.2	604	BC	17.4	604	BC	3.2	604	BC	19.6	604	BC	3.6	604	BC	2.7	604	BC	11.3	604	BC	12.5	604	BC	6.1	604	BC
16.1	605	BC	7.5	605	BC	2.3	605	BC	2.2	605	BC	17.4	605	BC	3.2	605	BC	19.6	605	BC	3.6	605	BC	2.7	605	BC	11.3	605	BC	12.5	605	BC	6.1	605	BC
16.1	606	BC	7.5	606	BC	2.3	606	BC	2.2	606	BC	17.5	606	BC	3.2	606	BC	19.7	606	BC	3.6	606	BC	2.8	606	BC	11.3	606	BC	12.5	606	BC	6.1	606	BC
16.1	607	BC	7.5	607	BC	2.4	607	BC	2.2	607	BC	17.5	607	BC	3.2	607	BC	19.7	607	BC	3.6	607	BC	2.8	607	BC	11.3	607	BC	12.5	607	BC	6.2	607	BC
16.2	608	BC	7.5	608	BC	2.4	608	BC	2.2	608	BC	17.5	608	BC	3.2	608	BC	19.7	608	BC	3.7	608	BC	2.8	608	BC	11.4	608	BC	12.5	608	BC	6.2	608	BC
16.2	609	BC	7.5	609	BC	2.4	609	BC	2.2	609	BC	17.6	609	BC	3.2	609	BC	19.8	609	BC	3.7	609	BC	2.8	609	BC	11.4	609	BC	12.6	609	BC	6.2	609	BC
16.2	610	BC	7.5	610	BC	2.4	610	BC	2.2	610	BC	17.6	610	BC	3.2	610	BC	19.8	610	BC	3.7	610	BC	2.8	610	BC	11.4	610	BC	12.6	610	BC	6.2	610	BC
16.2	611	BC	7.6	611	BC	2.4	611	BC	2.2	611	BC	17.6	611	BC	3.2	611	BC	19.8	611	BC	3.7	611	BC	2.8	611	BC	11.5	611	BC	12.6	611	BC	6.2	611	BC
16.3	612	BC	7.6	612	BC	2.4	612	BC	2.2	612	BC	17.7	612	BC	3.2	612	BC	19.9	612	BC	3.7	612	BC	2.8	612	BC	11.5	612	BC	12.6	612	BC	6.3	612	BC
16.3	613	BC	7.6	613	BC	2.4	613	BC	2.2	613	BC	17.8	613	BC	3.2	613	BC	19.9	613	BC	3.7	613	BC	2.8	613	BC	11.5	613	BC	12.6	613	BC	6.3	613	BC
16.3	614	BC	7.6	614	BC	2.4	614	BC	2.2	614	BC	17.8	614	BC	3.2	614	BC	19.9	614	BC	3.7	614	BC	2.8	614	BC	11.5	614	BC	12.7	614	BC	6.3	614	BC
16.4	615	BC	7.6	615	BC	2.4	615	BC	2.2	615	BC	17.8	615	BC	3.2	615	BC	20	615	BC	3.7	615	BC	2.8	615	BC	11.5	615	BC	12.7	615	BC	6.3	615	BC
16.4	616	BC	7.7	616	BC	2.4	616	BC	2.2	616	BC	17.9	616	BC	3.3	616	BC	20.1	616	BC	3.7	616	BC	2.8	616	BC	11.5	616	BC	12.7	616	BC	6.3	616	BC
16.4	617	BC	7.7	617	BC	2.4	617	BC	2.3	617	BC	18	617	BC	3.3	617	BC	20.1	617	BC	3.7	617	BC	2.8	617	BC	11.6	617	BC	12.7	617	BC	6.3	617	BC
16.4	618	BC	7.7	618	BC	2.4	618	BC	2.3	618	BC	18	618	BC	3.3	618	BC	20.1	618	BC	3.8	618	BC	2.8	618	BC	11.6	618	BC	12.8	618	BC	6.3	618	BC
16.5	619	BC	7.7	619	BC	2.4	619	BC	2.3	619	BC	18	619	BC	3.3	619	BC	20.2	619	BC	3.8	619	BC	2.8	619	BC	11.6	619	BC	12.8	619	BC	6.3	619	BC
16.5	620	BC	7.7	620	BC	2.4	620	BC	2.3	620	BC	18.1	620	BC	3.3	620	BC	20.2	620	BC	3.8	620	BC	2.8	620	BC	11.6	620	BC	12.8	620	BC	6.4	620	BC
16.5	621	BC	7.7	621	BC	2.4	621	BC	2.3	621	BC	18.1	621	BC	3.3	621	BC	20.2	621	BC	3.8	621	BC	2.9	621	BC	11.7	621	BC	12.9	621	BC	6.4	621	BC
16.5	622	BC	7.7	622	BC	2.4	622	BC	2.3	622	BC	18.1	622	BC	3.3	622	BC	20.3	622	BC	3.8	622	BC	2.9	622	BC	11.7	622	BC	12.9	622	BC	6.4	622	BC
16.5	623	BC	7.8	623	BC	2.4	623	BC	2.3	623	BC	18.2	623	BC	3.3	623	BC	20.3	623	BC	3.8	623	BC	2.9	623	BC	11.7	623	BC	12.9	623	BC	6.4	623	BC
16.6	624	BC	7.8	624	BC	2.4	624	BC	2.3	624	BC	18.2	624	BC	3.3	624	BC	20.3	624	BC	3.8	624	BC	2.9	624	BC	11.7	624	BC	12.9	624	BC	6.4	624	BC
16.6	625	BC	7.8	625	BC	2.4	625	BC	2.3	625	BC	18.3	625	BC	3.3	625	BC	20.4	625	BC	3.8	625	BC	2.9	625	BC	11.8	625	BC	12.9	625	BC	6.4	625	BC
16.6	626	BC	7.8	626	BC	2.4	626	BC	2.3	626	BC	18.3	626	BC	3.3	626	BC	20.4	626	BC	3.9	626	BC	2.9	626	BC	11.8	626	BC	13	626	BC	6.4	626	BC
16.6	627	BC	7.8	627	BC	2.4	627	BC	2.3	627	BC	18.4	627	BC	3.3	627	BC	20.5	627	BC	3.9	627	BC	2.9	627	BC	11.8	627	BC	13	627	BC	6.4	627	BC
16.7	628	BC	7.8	628	BC	2.5	628	BC	2.3	628	BC	18.5	628	BC	3.3	628	BC	20.5	628	BC	3.9	628	BC	2.9	628	BC	11.8	628	BC	13	628	BC	6.5	628	BC
16.7	629	BC	7.8	629	BC	2.5	629	BC	2.3	629	BC	18.5	629	BC	3.3	629	BC	20.6	629	BC	3.9	629	BC	2.9	629	BC	11.8	629	BC	13	629	BC	6.5	629	BC
16.7	630	BC	7.8	630	BC	2.5	630	BC	2.3	630	BC	18.5	630	BC	3.3	630	BC	20.6	630	BC	3.9	630	BC	2.9	630	BC	11.9	630	BC	13.1	630	BC	6.5	630	BC
16.8	631	BC	7.9	631	BC	2.5	631	BC	2.3	631	BC	18.5	631	BC	3.4	631	BC	20.6	631	BC	3.9	631	BC	2.9	631	BC	11.9	631	BC	13.1	631	BC	6.5	631	BC
16.8	632	BC	7.9	632	BC	2.5	632	BC	2.3	632	BC	18.6	632	BC	3.4	632	BC	20.7	632	BC	3.9	632	BC	3	632	BC	11.9	632	BC	13.1	632	BC	6.5	632	BC
16.8	633	BC	7.9	633	BC	2.5	633	BC	2.3	633	BC	18.6	633	BC	3.4	633	BC	20.7	633	BC	3.9	633	BC	3	633	BC	12	633	BC	13.1	633	BC	6.5	633	BC
16.9	634	BC	7.9	634	BC	2.5	634	BC	2.3	634	BC	18.7	634	BC	3.4	634	BC	20.8	634	BC	4	634	BC	3	634	BC	12	634	BC	13.1	634	BC	6.5	634	BC
16.9	635	BC	7.9	635	BC	2.5	635	BC	2.3	635	BC	18.7	635	BC	3.4	635	BC	20.8	635	BC	4	635	BC	3	635	BC	12	635	BC	13.2	635	BC	6.5	635	BC
16.9	636	BC	8	636	BC	2.5	636	BC	2.3	636	BC	18.7	636	BC	3.4	636	BC	20.9	636	BC	4	636	BC	3	636	BC	12	636	BC	13.2	636	BC	6.5	636	BC
16.9	637	BC	8	637	BC	2.5	637	BC	2.4	637	BC	18.8	637	BC	3.4	637	BC	20.9	637	BC	4	637	BC	3	637	BC	12	637	BC	13.2	637	BC	6.6	637	BC
17	638	BC	8	638	BC	2.5	638	BC	2.4	638	BC	18.8	638	BC	3.4	638	BC	20.9	638	BC	4	638	BC	3	638	BC	12.1	638	BC	13.2	638	BC	6.6	638	BC
17	639	BC	8	639	BC	2.5	639	BC	2.4	639	BC	18.8	639	BC	3.4	639	BC	21	639	BC	4	639	BC	3	639	BC	12.1	639	BC	13.3	639	BC	6.6	639	BC
17	640	BC	8	640	BC	2.5	640	BC	2.4	640	BC	18.9	640	BC	3.4	640	BC	21	640	BC	4	640	BC	3	640	BC	12.1	640	BC	13.3	640	BC	6.6	640	BC
17	641	BC	8	641	BC	2.5	641	BC	2.4	641	BC	18.9	641	BC	3.4	641	BC	21.1	641	BC	4	641	BC	3	641	BC	12.1	641	BC	13.4	641	BC	6.6	641	BC
17.1	642	BC	8	642	BC	2.5	642	BC	2.4	642	BC	19	642	BC	3.4	642	BC	21.1	642	BC	4	642	BC	3.1	642	BC	12.2	642	BC	13.4	642	BC	6.6	642	BC
17.1	643	BC	8	643	BC	2.5	643	BC	2.4	643	BC	19	643	BC	3.4	643	BC	21.2	643	BC	4	643	BC	3.1	643	BC	12.2	643	BC	13.4	643	BC	6.7	643	BC
17.1	644	BC	8	644	BC	2.5	644	BC	2.4	644	BC	19.1	644	BC	3.4	644	BC	21.2	644	BC	4.1	644	BC	3.1	644	BC	12.2	644	BC	13.5	644	BC	6.7	644	BC
17.1	645	BC	8.1	645	BC	2.5	645	BC	2.4	645	BC	19.1	645	BC	3.4	645	BC	21.2	645	BC	4.1	645	BC	3.1	645	BC	12.2	645	BC	13.5	645	BC	6.7	645	BC
17.2	646	BC	8.1	646	BC	2.5	646	BC	2.4	646	BC	19.2	646	BC	3.5	646	BC	21.3	646	BC	4.1	646	BC	3.1	646	BC	12.2	646	BC	13.5	646	BC	6.7	646	BC
17.2	647	BC	8.1	647	BC	2.5	647	BC	2.4	647	BC	19.2	647	BC	3.5	647	BC	21.3	647	BC	4.1	647	BC	3.1	647	BC	12.2	647	BC	13.5	647	BC	6.7	647	BC
17.2	648	BC	8.1	648	BC	2.5	648	BC	2.4	648	BC	19.2	648	BC	3.5	648	BC	21.4	648	BC	4.1	648	BC	3.1	648	BC	12.3	648	BC	13.5	648	BC	6.7	648	BC
17.2	649	BC	8.1	649	BC	2.5	649	BC	2.4	649	BC	19.3	649	BC	3.5	649	BC	21.4	649	BC	4.1	649	BC	3.1	649	BC	12.3	649	BC	13.6	649	BC	6.7	649	BC
17.3	650	BC	8.1	650	BC	2.6	650	BC	2.4	650	BC	19.4	650	BC	3.5	650	BC	21.4	650	BC	4.1	650	BC	3.1	650	BC	12.3	650	BC	13.6	650	BC	6.7	650	BC
17.3	651	BC	8.1	651	BC	2.6	651	BC	2.4	651	BC	19.4	651	BC	3.5	651	BC	21.5	651	BC	4.1	651	BC	3.1	651	BC	12.3	651	BC	13.6	651	BC	6.8	651	BC
17.3	652	BC	8.2	652	BC	2.6	652	BC	2.4	652	BC	19.4	652	BC	3.5	652	BC	21.6	652	BC	4.1	652	BC	3.1	652	BC	12.4	652	BC	13.6	652	BC	6.8	652	BC
17.4	653	BC	8.2	653	BC	2.6	653	BC	2.4	653	BC	19.4	653	BC	3.5	653	BC	21.7	653	BC	4.2	653	BC	3.2	653	BC	12.4	653	BC	13.7	653	BC	6.8	653	BC
17.4	654	BC	8.2	654	BC	2.6	654	BC	2.4	654	BC	19.5	654	BC	3.5	654	BC	21.8	654	BC	4.2	654	BC	3.2	654	BC	12.4	654	BC	13.7	654	BC	6.8	654	BC
17.4	655	BC	8.2	655	BC	2.6	655	BC	2.5	655	BC	19.5	655	BC	3.5	655	BC	21.8	655	BC	4.2	655	BC	3.2	655	BC	12.4	655	BC	13.7	655	BC	6.8	655	BC
17.5	656	BC	8.2	656	BC	2.6	656	BC	2.5	656	BC	19.5	656	BC	3.5	656	BC	21.9	656	BC	4.2	656	BC	3.2	656	BC	12.4	656	BC	13.7	656	BC	6.8	656	BC
17.5	657	BC	8.2	657	BC	2.6	657	BC	2.5	657	BC	19.6	657	BC	3.5	657	BC	22	657	BC	4.2	657	BC	3.2	657	BC	12.5	657	BC	13.8	657	BC	6.8	657	BC
17.5	658	BC	8.2	658	BC	2.6	658	BC	2.5	658	BC	19.6	658	BC	3.5	658	BC	22	658	BC	4.2	658	BC	3.2	658	BC	12.5	658	BC	13.8	658	BC	6.8	658	BC
17.6	659	BC	8.2	659	BC	2.6	659	BC	2.5	659	BC	19.6	659	BC	3.5	659	BC	22.1	659	BC	4.2	659	BC	3.2	659	BC	12.5	659	BC	13.8	659	BC	6.8	659	BC
17.6	660	BC	8.3	660	BC	2.6	660	BC	2.5	660	BC	19.6	660	BC	3.5	660	BC	22.1	660	BC	4.2	660	BC	3.3	660	BC	12.5	660	BC	13.8	660	BC	6.9	660	BC
17.6	661	BC	8.3	661	BC	2.6	661	BC	2.5	661	BC	19.7	661	BC	3.5	661	BC	22.1	661	BC	4.2	661	BC	3.3	661	BC	12.5	661	BC	13.9	661	BC	6.9	661	BC
17.7	662	BC	8.3	662	BC	2.6	662	BC	2.5	662	BC	19.8	662	BC	3.6	662	BC	22.2	662	BC	4.2	662	BC	3.3	662	BC	12.5	662	BC	13.9	662	BC	6.9	662	BC
17.7	663	BC	8.3	663	BC	2.6	663	BC	2.5	663	BC	19.8	663	BC	3.6	663	BC	22.2	663	BC	4.2	663	BC	3.3	663	BC	12.6	663	BC	13.9	663	BC	6.9	663	BC
17.7	664	BC	8.3	664	BC	2.6	664	BC	2.5	664	BC	19.8	664	BC	3.6	664	BC	22.3	664	BC	4.3	664	BC	3.3	664	BC	12.6	664	BC	13.9	664	BC	6.9	664	BC
17.7	665	BC	8.3	665	BC	2.6	665	BC	2.5	665	BC	19.9	665	BC	3.6	665	BC	22.4	665	BC	4.3	665	BC	3.3	665	BC	12.6	665	BC	13.9	665	BC	6.9	665	BC
17.7	666	BC	8.4	666	BC	2.6	666	BC	2.5	666	BC	19.9	666	BC	3.6	666	BC	22.5	666	BC	4.3	666	BC	3.3	666	BC	12.6	666	BC	14	666	BC	6.9	666	BC
17.8	667	BC	8.4	667	BC	2.6	667	BC	2.5	667	BC	19.9	667	BC	3.6	667	BC	22.5	667	BC	4.3	667	BC	3.3	667	BC	12.6	667	BC	14	667	BC	6.9	667	BC
17.8	668	BC	8.4	668	BC	2.7	668	BC	2.5	668	BC	20	668	BC	3.6	668	BC	22.5	668	BC	4.3	668	BC	3.4	668	BC	12.6	668	BC	14	668	BC	7	668	BC
17.8	669	BC	8.4	669	BC	2.7	669	BC	2.5	669	BC	20	669	BC	3.6	669	BC	22.5	669	BC	4.3	669	BC	3.4	669	BC	12.7	669	BC	14	669	BC	7	669	BC
17.8	670	BC	8.4	670	BC	2.7	670	BC	2.5	670	BC	20.1	670	BC	3.6	670	BC	22.6	670	BC	4.4	670	BC	3.4	670	BC	12.7	670	BC	14	670	BC	7	670	BC
17.9	671	BC	8.4	671	BC	2.7	671	BC	2.6	671	BC	20.1	671	BC	3.6	671	BC	22.6	671	BC	4.4	671	BC	3.4	671	BC	12.7	671	BC	14.1	671	BC	7	671	BC
17.9	672	BC	8.5	672	BC	2.7	672	BC	2.6	672	BC	20.2	672	BC	3.6	672	BC	22.7	672	BC	4.4	672	BC	3.4	672	BC	12.7	672	BC	14.1	672	BC	7	672	BC
17.9	673	BC	8.5	673	BC	2.7	673	BC	2.6	673	BC	20.2	673	BC	3.6	673	BC	22.7	673	BC	4.4	673	BC	3.4	673	BC	12.8	673	BC	14.1	673	BC	7	673	BC
17.9	674	BC	8.5	674	BC	2.7	674	BC	2.6	674	BC	20.3	674	BC	3.6	674	BC	22.8	674	BC	4.4	674	BC	3.4	674	BC	12.8	674	BC	14.1	674	BC	7	674	BC
18	675	BC	8.5	675	BC	2.7	675	BC	2.6	675	BC	20.3	675	BC	3.6	675	BC	22.9	675	BC	4.4	675	BC	3.4	675	BC	12.8	675	BC	14.1	675	BC	7	675	BC
18	676	BC	8.5	676	BC	2.7	676	BC	2.6	676	BC	20.3	676	BC	3.6	676	BC	22.9	676	BC	4.4	676	BC	3.4	676	BC	12.8	676	BC	14.2	676	BC	7	676	BC
18	677	BC	8.5	677	BC	2.7	677	BC	2.6	677	BC	20.3	677	BC	3.6	677	BC	23	677	BC	4.4	677	BC	3.4	677	BC	12.8	677	BC	14.2	677	BC	7.1	677	BC
18.1	678	BC	8.5	678	BC	2.7	678	BC	2.6	678	BC	20.4	678	BC	3.7	678	BC	23	678	BC	4.4	678	BC	3.5	678	BC	12.8	678	BC	14.2	678	BC	7.1	678	BC
18.1	679	BC	8.6	679	BC	2.7	679	BC	2.6	679	BC	20.4	679	BC	3.7	679	BC	23.1	679	BC	4.4	679	BC	3.5	679	BC	12.9	679	BC	14.2	679	BC	7.1	679	BC
18.1	680	BC	8.6	680	BC	2.7	680	BC	2.6	680	BC	20.5	680	BC	3.7	680	BC	23.1	680	BC	4.5	680	BC	3.5	680	BC	12.9	680	BC	14.2	680	BC	7.1	680	BC
18.2	681	BC	8.6	681	BC	2.7	681	BC	2.6	681	BC	20.5	681	BC	3.7	681	BC	23.1	681	BC	4.5	681	BC	3.5	681	BC	12.9	681	BC	14.3	681	BC	7.1	681	BC
18.2	682	BC	8.6	682	BC	2.7	682	BC	2.6	682	BC	20.5	682	BC	3.7	682	BC	23.2	682	BC	4.5	682	BC	3.5	682	BC	13	682	BC	14.3	682	BC	7.1	682	BC
18.2	683	BC	8.6	683	BC	2.7	683	BC	2.6	683	BC	20.6	683	BC	3.7	683	BC	23.3	683	BC	4.5	683	BC	3.5	683	BC	13	683	BC	14.3	683	BC	7.1	683	BC
18.3	684	BC	8.6	684	BC	2.7	684	BC	2.6	684	BC	20.6	684	BC	3.7	684	BC	23.3	684	BC	4.5	684	BC	3.5	684	BC	13	684	BC	14.3	684	BC	7.2	684	BC
18.3	685	BC	8.7	685	BC	2.7	685	BC	2.6	685	BC	20.7	685	BC	3.7	685	BC	23.4	685	BC	4.5	685	BC	3.5	685	BC	13	685	BC	14.3	685	BC	7.2	685	BC
18.3	686	BC	8.8	686	BC	2.8	686	BC	2.6	686	BC	20.7	686	BC	3.7	686	BC	23.4	686	BC	4.5	686	BC	3.5	686	BC	13.1	686	BC	14.4	686	BC	7.2	686	BC
18.4	687	BC	8.8	687	BC	2.8	687	BC	2.6	687	BC	20.8	687	BC	3.7	687	BC	23.5	687	BC	4.6	687	BC	3.5	687	BC	13.1	687	BC	14.4	687	BC	7.2	687	BC
18.4	688	BC	8.8	688	BC	2.8	688	BC	2.7	688	BC	20.8	688	BC	3.7	688	BC	23.6	688	BC	4.6	688	BC	3.6	688	BC	13.1	688	BC	14.4	688	BC	7.2	688	BC
18.4	689	BC	8.8	689	BC	2.8	689	BC	2.7	689	BC	20.9	689	BC	3.7	689	BC	23.6	689	BC	4.6	689	BC	3.6	689	BC	13.1	689	BC	14.4	689	BC	7.2	689	BC
18.4	690	BC	8.8	690	BC	2.8	690	BC	2.7	690	BC	20.9	690	BC	3.7	690	BC	23.6	690	BC	4.6	690	BC	3.6	690	BC	13.1	690	BC	14.5	690	BC	7.2	690	BC
18.4	691	BC	8.8	691	BC	2.8	691	BC	2.7	691	BC	21	691	BC	3.8	691	BC	23.7	691	BC	4.6	691	BC	3.6	691	BC	13.1	691	BC	14.5	691	BC	7.2	691	BC
18.5	692	BC	8.9	692	BC	2.8	692	BC	2.7	692	BC	21	692	BC	3.8	692	BC	23.8	692	BC	4.6	692	BC	3.6	692	BC	13.2	692	BC	14.5	692	BC	7.2	692	BC
18.5	693	BC	8.9	693	BC	2.8	693	BC	2.7	693	BC	21	693	BC	3.8	693	BC	23.8	693	BC	4.6	693	BC	3.6	693	BC	13.2	693	BC	14.5	693	BC	7.3	693	BC
18.5	694	BC	8.9	694	BC	2.8	694	BC	2.7	694	BC	21.1	694	BC	3.8	694	BC	23.9	694	BC	4.7	694	BC	3.6	694	BC	13.2	694	BC	14.5	694	BC	7.3	694	BC
18.5	695	BC	8.9	695	BC	2.8	695	BC	2.7	695	BC	21.1	695	BC	3.8	695	BC	23.9	695	BC	4.7	695	BC	3.6	695	BC	13.2	695	BC	14.6	695	BC	7.3	695	BC
18.6	696	BC	8.9	696	BC	2.8	696	BC	2.7	696	BC	21.2	696	BC	3.8	696	BC	24	696	BC	4.7	696	BC	3.6	696	BC	13.2	696	BC	14.6	696	BC	7.3	696	BC
18.6	697	BC	8.9	697	BC	2.8	697	BC	2.7	697	BC	21.2	697	BC	3.8	697	BC	24.1	697	BC	4.7	697	BC	3.7	697	BC	13.3	697	BC	14.6	697	BC	7.3	697	BC
18.6	698	BC	9	698	BC	2.8	698	BC	2.7	698	BC	21.3	698	BC	3.8	698	BC	24.1	698	BC	4.7	698	BC	3.7	698	BC	13.3	698	BC	14.6	698	BC	7.3	698	BC
18.6	699	BC	9	699	BC	2.8	699	BC	2.7	699	BC	21.3	699	BC	3.8	699	BC	24.1	699	BC	4.7	699	BC	3.7	699	BC	13.3	699	BC	14.7	699	BC	7.4	699	BC
18.7	700	BC	9	700	BC	2.8	700	BC	2.8	700	BC	21.4	700	BC	3.8	700	BC	24.2	700	BC	4.7	700	BC	3.7	700	BC	13.3	700	BC	14.7	700	BC	7.4	700	BC
18.7	701	BC	9	701	BC	2.8	701	BC	2.8	701	BC	21.5	701	BC	3.8	701	BC	24.3	701	BC	4.8	701	BC	3.7	701	BC	13.3	701	BC	14.8	701	BC	7.4	701	BC
18.8	702	BC	9	702	BC	2.8	702	BC	2.8	702	BC	21.5	702	BC	3.8	702	BC	24.4	702	BC	4.8	702	BC	3.7	702	BC	13.4	702	BC	14.8	702	BC	7.4	702	BC
18.8	703	BC	9	703	BC	2.8	703	BC	2.8	703	BC	21.5	703	BC	3.9	703	BC	24.4	703	BC	4.8	703	BC	3.7	703	BC	13.4	703	BC	14.8	703	BC	7.4	703	BC
18.8	704	BC	9.1	704	BC	2.8	704	BC	2.8	704	BC	21.6	704	BC	3.9	704	BC	24.5	704	BC	4.8	704	BC	3.7	704	BC	13.4	704	BC	14.8	704	BC	7.4	704	BC
18.8	705	BC	9.1	705	BC	2.8	705	BC	2.8	705	BC	21.6	705	BC	3.9	705	BC	24.5	705	BC	4.8	705	BC	3.7	705	BC	13.4	705	BC	14.9	705	BC	7.4	705	BC
18.9	706	BC	9.1	706	BC	2.8	706	BC	2.8	706	BC	21.7	706	BC	3.9	706	BC	24.6	706	BC	4.9	706	BC	3.8	706	BC	13.5	706	BC	14.9	706	BC	7.4	706	BC
18.9	707	BC	9.1	707	BC	2.8	707	BC	2.8	707	BC	21.7	707	BC	3.9	707	BC	24.7	707	BC	4.9	707	BC	3.8	707	BC	13.5	707	BC	14.9	707	BC	7.5	707	BC
18.9	708	BC	9.1	708	BC	2.8	708	BC	2.8	708	BC	21.8	708	BC	3.9	708	BC	24.7	708	BC	4.9	708	BC	3.8	708	BC	13.5	708	BC	14.9	708	BC	7.5	708	BC
19.6	709	BC	9.1	709	BC	2.9	709	BC	2.8	709	BC	21.8	709	BC	3.9	709	BC	24.7	709	BC	4.9	709	BC	3.8	709	BC	13.5	709	BC	14.9	709	BC	7.5	709	BC
19.6	710	BC	9.1	710	BC	2.9	710	BC	2.8	710	BC	21.9	710	BC	3.9	710	BC	24.7	710	BC	4.9	710	BC	3.8	710	BC	13.5	710	BC	15	710	BC	7.5	710	BC
19.7	711	BC	9.1	711	BC	2.9	711	BC	2.8	711	BC	21.9	711	BC	3.9	711	BC	24.8	711	BC	4.9	711	BC	3.8	711	BC	13.6	711	BC	15	711	BC	7.5	711	BC
19.7	712	BC	9.2	712	BC	2.9	712	BC	2.8	712	BC	22	712	BC	3.9	712	BC	24.9	712	BC	5	712	BC	3.8	712	BC	13.6	712	BC	15	712	BC	7.5	712	BC
19.7	713	BC	9.2	713	BC	2.9	713	BC	2.8	713	BC	22.1	713	BC	3.9	713	BC	24.9	713	BC	5	713	BC	3.8	713	BC	13.6	713	BC	15	713	BC	7.5	713	BC
19.7	714	BC	9.2	714	BC	2.9	714	BC	2.8	714	BC	22.1	714	BC	3.9	714	BC	25	714	BC	5	714	BC	3.9	714	BC	13.6	714	BC	15	714	BC	7.6	714	BC
19.8	715	BC	9.2	715	BC	2.9	715	BC	2.8	715	BC	22.2	715	BC	4	715	BC	25	715	BC	5	715	BC	3.9	715	BC	13.7	715	BC	15.1	715	BC	7.6	715	BC
19.8	716	BC	9.2	716	BC	2.9	716	BC	2.8	716	BC	22.2	716	BC	4	716	BC	25.1	716	BC	5	716	BC	3.9	716	BC	13.7	716	BC	15.1	716	BC	7.6	716	BC
19.8	717	BC	9.2	717	BC	2.9	717	BC	2.8	717	BC	22.3	717	BC	4	717	BC	25.1	717	BC	5	717	BC	3.9	717	BC	13.7	717	BC	15.1	717	BC	7.6	717	BC
19.8	718	BC	9.2	718	BC	2.9	718	BC	2.9	718	BC	22.5	718	BC	4	718	BC	25.3	718	BC	5	718	BC	3.9	718	BC	13.8	718	BC	15.1	718	BC	7.6	718	BC
19.9	719	BC	9.3	719	BC	2.9	719	BC	2.9	719	BC	22.5	719	BC	4	719	BC	25.4	719	BC	5.1	719	BC	3.9	719	BC	13.8	719	BC	15.1	719	BC	7.7	719	BC
19.9	720	BC	9.3	720	BC	2.9	720	BC	2.9	720	BC	22.6	720	BC	4	720	BC	25.5	720	BC	5.1	720	BC	3.9	720	BC	13.8	720	BC	15.2	720	BC	7.7	720	BC
19.9	721	BC	9.3	721	BC	2.9	721	BC	2.9	721	BC	22.6	721	BC	4	721	BC	25.5	721	BC	5.1	721	BC	4	721	BC	13.8	721	BC	15.2	721	BC	7.7	721	BC
20	722	BC	9.3	722	BC	2.9	722	BC	2.9	722	BC	22.7	722	BC	4	722	BC	25.6	722	BC	5.1	722	BC	4	722	BC	13.8	722	BC	15.2	722	BC	7.7	722	BC
20	723	BC	9.3	723	BC	2.9	723	BC	2.9	723	BC	22.7	723	BC	4	723	BC	25.6	723	BC	5.1	723	BC	4	723	BC	13.9	723	BC	15.2	723	BC	7.7	723	BC
20	724	BC	9.3	724	BC	2.9	724	BC	2.9	724	BC	22.7	724	BC	4	724	BC	25.7	724	BC	5.1	724	BC	4	724	BC	13.9	724	BC	15.2	724	BC	7.7	724	BC
20	725	BC	9.4	725	BC	3	725	BC	2.9	725	BC	22.8	725	BC	4.1	725	BC	25.8	725	BC	5.1	725	BC	4	725	BC	13.9	725	BC	15.3	725	BC	7.7	725	BC
20.1	726	BC	9.4	726	BC	3	726	BC	2.9	726	BC	23	726	BC	4.1	726	BC	25.9	726	BC	5.1	726	BC	4	726	BC	14	726	BC	15.3	726	BC	7.8	726	BC
20.1	727	BC	9.4	727	BC	3	727	BC	2.9	727	BC	23	727	BC	4.1	727	BC	26	727	BC	5.2	727	BC	4	727	BC	14	727	BC	15.3	727	BC	7.8	727	BC
20.1	728	BC	9.4	728	BC	3	728	BC	2.9	728	BC	23.1	728	BC	4.1	728	BC	26	728	BC	5.2	728	BC	4.1	728	BC	14	728	BC	15.3	728	BC	7.8	728	BC
20.1	729	BC	9.4	729	BC	3	729	BC	2.9	729	BC	23.1	729	BC	4.1	729	BC	26.1	729	BC	5.2	729	BC	4.1	729	BC	14	729	BC	15.3	729	BC	7.8	729	BC
20.2	730	BC	9.4	730	BC	3	730	BC	2.9	730	BC	23.3	730	BC	4.1	730	BC	26.2	730	BC	5.2	730	BC	4.1	730	BC	14.1	730	BC	15.4	730	BC	7.8	730	BC
20.2	731	BC	9.5	731	BC	3	731	BC	2.9	731	BC	23.3	731	BC	4.1	731	BC	26.2	731	BC	5.2	731	BC	4.1	731	BC	14.1	731	BC	15.4	731	BC	7.8	731	BC
20.2	732	BC	9.5	732	BC	3	732	BC	2.9	732	BC	23.4	732	BC	4.1	732	BC	26.2	732	BC	5.2	732	BC	4.1	732	BC	14.1	732	BC	15.4	732	BC	7.8	732	BC
20.2	733	BC	9.5	733	BC	3	733	BC	3	733	BC	23.5	733	BC	4.1	733	BC	26.3	733	BC	5.2	733	BC	4.1	733	BC	14.2	733	BC	15.4	733	BC	7.9	733	BC
20.3	734	BC	9.5	734	BC	3	734	BC	3	734	BC	23.5	734	BC	4.1	734	BC	26.4	734	BC	5.3	734	BC	4.1	734	BC	14.2	734	BC	15.4	734	BC	7.9	734	BC
20.3	735	BC	9.5	735	BC	3	735	BC	3	735	BC	23.6	735	BC	4.1	735	BC	26.4	735	BC	5.3	735	BC	4.1	735	BC	14.2	735	BC	15.5	735	BC	7.9	735	BC
20.3	736	BC	9.5	736	BC	3	736	BC	3	736	BC	23.7	736	BC	4.2	736	BC	26.5	736	BC	5.3	736	BC	4.1	736	BC	14.2	736	BC	15.5	736	BC	7.9	736	BC
20.3	737	BC	9.6	737	BC	3	737	BC	3	737	BC	23.8	737	BC	4.2	737	BC	26.5	737	BC	5.3	737	BC	4.1	737	BC	14.3	737	BC	15.5	737	BC	7.9	737	BC
20.4	738	BC	9.6	738	BC	3	738	BC	3	738	BC	23.9	738	BC	4.2	738	BC	26.6	738	BC	5.3	738	BC	4.2	738	BC	14.3	738	BC	15.5	738	BC	7.9	738	BC
20.4	739	BC	9.6	739	BC	3	739	BC	3	739	BC	23.9	739	BC	4.2	739	BC	26.7	739	BC	5.4	739	BC	4.2	739	BC	14.3	739	BC	15.5	739	BC	8	739	BC
20.4	740	BC	9.6	740	BC	3	740	BC	3	740	BC	24	740	BC	4.2	740	BC	26.8	740	BC	5.4	740	BC	4.2	740	BC	14.4	740	BC	15.6	740	BC	8	740	BC
20.4	741	BC	9.6	741	BC	3	741	BC	3	741	BC	24.1	741	BC	4.2	741	BC	26.9	741	BC	5.4	741	BC	4.2	741	BC	14.4	741	BC	15.6	741	BC	8	741	BC
20.5	742	BC	9.7	742	BC	3.1	742	BC	3	742	BC	24.2	742	BC	4.2	742	BC	27	742	BC	5.4	742	BC	4.2	742	BC	14.4	742	BC	15.6	742	BC	8	742	BC
20.5	743	BC	9.7	743	BC	3.1	743	BC	3	743	BC	24.3	743	BC	4.2	743	BC	27	743	BC	5.4	743	BC	4.3	743	BC	14.4	743	BC	15.6	743	BC	8	743	BC
20.5	744	BC	9.7	744	BC	3.1	744	BC	3	744	BC	24.4	744	BC	4.2	744	BC	27.1	744	BC	5.4	744	BC	4.3	744	BC	14.4	744	BC	15.6	744	BC	8.1	744	BC
20.6	745	BC	9.7	745	BC	3.1	745	BC	3.1	745	BC	24.4	745	BC	4.2	745	BC	27.1	745	BC	5.5	745	BC	4.3	745	BC	14.5	745	BC	15.7	745	BC	8.1	745	BC
20.6	746	BC	9.7	746	BC	3.1	746	BC	3.1	746	BC	24.4	746	BC	4.2	746	BC	27.2	746	BC	5.5	746	BC	4.3	746	BC	14.5	746	BC	15.7	746	BC	8.1	746	BC
20.6	747	BC	9.7	747	BC	3.1	747	BC	3.1	747	BC	24.5	747	BC	4.2	747	BC	27.3	747	BC	5.5	747	BC	4.3	747	BC	14.5	747	BC	15.7	747	BC	8.1	747	BC
20.6	748	BC	9.7	748	BC	3.1	748	BC	3.1	748	BC	24.6	748	BC	4.2	748	BC	27.4	748	BC	5.5	748	BC	4.3	748	BC	14.5	748	BC	15.7	748	BC	8.1	748	BC
20.7	749	BC	9.8	749	BC	3.1	749	BC	3.1	749	BC	24.7	749	BC	4.2	749	BC	27.5	749	BC	5.5	749	BC	4.4	749	BC	14.6	749	BC	15.7	749	BC	8.1	749	BC
20.7	750	BC	9.8	750	BC	3.1	750	BC	3.1	750	BC	24.8	750	BC	4.2	750	BC	27.5	750	BC	5.5	750	BC	4.4	750	BC	14.6	750	BC	15.8	750	BC	8.1	750	BC
20.7	751	BC	9.8	751	BC	3.1	751	BC	3.1	751	BC	24.9	751	BC	4.2	751	BC	27.6	751	BC	5.6	751	BC	4.4	751	BC	14.6	751	BC	15.8	751	BC	8.2	751	BC
20.8	752	BC	9.8	752	BC	3.1	752	BC	3.2	752	BC	25	752	BC	4.3	752	BC	27.7	752	BC	5.6	752	BC	4.4	752	BC	14.6	752	BC	15.8	752	BC	8.2	752	BC
20.8	753	BC	9.8	753	BC	3.1	753	BC	3.2	753	BC	25.1	753	BC	4.3	753	BC	27.8	753	BC	5.6	753	BC	4.4	753	BC	14.6	753	BC	15.8	753	BC	8.2	753	BC
20.8	754	BC	9.8	754	BC	3.1	754	BC	3.2	754	BC	25.2	754	BC	4.3	754	BC	27.9	754	BC	5.6	754	BC	4.5	754	BC	14.7	754	BC	15.9	754	BC	8.2	754	BC
20.9	755	BC	9.9	755	BC	3.1	755	BC	3.2	755	BC	25.3	755	BC	4.3	755	BC	27.9	755	BC	5.6	755	BC	4.5	755	BC	14.7	755	BC	15.9	755	BC	8.2	755	BC
20.9	756	BC	9.9	756	BC	3.1	756	BC	3.2	756	BC	25.3	756	BC	4.3	756	BC	28	756	BC	5.7	756	BC	4.5	756	BC	14.7	756	BC	15.9	756	BC	8.2	756	BC
20.9	757	BC	9.9	757	BC	3.1	757	BC	3.2	757	BC	25.4	757	BC	4.3	757	BC	28.1	757	BC	5.7	757	BC	4.5	757	BC	14.8	757	BC	15.9	757	BC	8.3	757	BC
20.9	758	BC	9.9	758	BC	3.1	758	BC	3.2	758	BC	25.5	758	BC	4.3	758	BC	28.2	758	BC	5.7	758	BC	4.6	758	BC	14.8	758	BC	16	758	BC	8.3	758	BC
21	759	BC	9.9	759	BC	3.1	759	BC	3.2	759	BC	25.6	759	BC	4.3	759	BC	28.3	759	BC	5.7	759	BC	4.6	759	BC	14.9	759	BC	16	759	BC	8.3	759	BC
21	760	BC	9.9	760	BC	3.2	760	BC	3.2	760	BC	25.6	760	BC	4.3	760	BC	28.3	760	BC	5.7	760	BC	4.6	760	BC	14.9	760	BC	16	760	BC	8.3	760	BC
21	761	BC	10	761	BC	3.2	761	BC	3.2	761	BC	25.8	761	BC	4.3	761	BC	28.4	761	BC	5.8	761	BC	4.6	761	BC	14.9	761	BC	16	761	BC	8.3	761	BC
21.1	762	BC	10	762	BC	3.2	762	BC	3.2	762	BC	25.8	762	BC	4.3	762	BC	28.5	762	BC	5.8	762	BC	4.6	762	BC	14.9	762	BC	16	762	BC	8.3	762	BC
21.1	763	BC	10	763	BC	3.2	763	BC	3.2	763	BC	25.9	763	BC	4.3	763	BC	28.5	763	BC	5.8	763	BC	4.7	763	BC	14.9	763	BC	16.1	763	BC	8.3	763	BC
21.1	764	BC	10.1	764	BC	3.2	764	BC	3.2	764	BC	26	764	BC	4.3	764	BC	28.6	764	BC	5.8	764	BC	4.7	764	BC	15	764	BC	16.1	764	BC	8.3	764	BC
21.2	765	BC	10.1	765	BC	3.2	765	BC	3.2	765	BC	26.1	765	BC	4.3	765	BC	28.6	765	BC	5.8	765	BC	4.7	765	BC	15	765	BC	16.1	765	BC	8.4	765	BC
21.2	766	BC	10.1	766	BC	3.2	766	BC	3.2	766	BC	26.2	766	BC	4.3	766	BC	28.7	766	BC	5.8	766	BC	4.7	766	BC	15.1	766	BC	16.2	766	BC	8.4	766	BC
21.2	767	BC	10.1	767	BC	3.2	767	BC	3.3	767	BC	26.2	767	BC	4.3	767	BC	28.7	767	BC	5.9	767	BC	4.7	767	BC	15.1	767	BC	16.3	767	BC	8.4	767	BC
21.2	768	BC	10.1	768	BC	3.2	768	BC	3.3	768	BC	26.3	768	BC	4.4	768	BC	28.8	768	BC	5.9	768	BC	4.7	768	BC	15.1	768	BC	16.3	768	BC	8.4	768	BC
21.3	769	BC	10.2	769	BC	3.2	769	BC	3.3	769	BC	26.4	769	BC	4.4	769	BC	28.9	769	BC	5.9	769	BC	4.8	769	BC	15.2	769	BC	16.3	769	BC	8.4	769	BC
21.3	770	BC	10.2	770	BC	3.2	770	BC	3.3	770	BC	26.5	770	BC	4.4	770	BC	29	770	BC	5.9	770	BC	4.8	770	BC	15.2	770	BC	16.3	770	BC	8.4	770	BC
21.3	771	BC	10.2	771	BC	3.3	771	BC	3.3	771	BC	26.6	771	BC	4.4	771	BC	29.1	771	BC	5.9	771	BC	4.8	771	BC	15.2	771	BC	16.4	771	BC	8.4	771	BC
21.3	772	BC	10.2	772	BC	3.3	772	BC	3.3	772	BC	26.6	772	BC	4.4	772	BC	29.1	772	BC	6	772	BC	4.8	772	BC	15.2	772	BC	16.4	772	BC	8.5	772	BC
21.4	773	BC	10.2	773	BC	3.3	773	BC	3.3	773	BC	26.7	773	BC	4.4	773	BC	29.2	773	BC	6	773	BC	4.8	773	BC	15.3	773	BC	16.4	773	BC	8.5	773	BC
21.4	774	BC	10.2	774	BC	3.3	774	BC	3.3	774	BC	26.7	774	BC	4.4	774	BC	29.3	774	BC	6	774	BC	4.8	774	BC	15.3	774	BC	16.4	774	BC	8.5	774	BC
21.4	775	BC	10.2	775	BC	3.3	775	BC	3.3	775	BC	26.8	775	BC	4.4	775	BC	29.4	775	BC	6	775	BC	4.9	775	BC	15.3	775	BC	16.5	775	BC	8.5	775	BC
21.4	776	BC	10.2	776	BC	3.3	776	BC	3.3	776	BC	26.8	776	BC	4.4	776	BC	29.4	776	BC	6	776	BC	4.9	776	BC	15.3	776	BC	16.5	776	BC	8.5	776	BC
21.5	777	BC	10.2	777	BC	3.3	777	BC	3.3	777	BC	26.9	777	BC	4.4	777	BC	29.5	777	BC	6.1	777	BC	4.9	777	BC	15.4	777	BC	16.5	777	BC	8.5	777	BC
21.5	778	BC	10.3	778	BC	3.3	778	BC	3.3	778	BC	26.9	778	BC	4.4	778	BC	29.6	778	BC	6.1	778	BC	4.9	778	BC	15.4	778	BC	16.6	778	BC	8.5	778	BC
21.5	779	BC	10.3	779	BC	3.3	779	BC	3.4	779	BC	27	779	BC	4.4	779	BC	29.6	779	BC	6.1	779	BC	4.9	779	BC	15.8	779	BC	16.6	779	BC	8.5	779	BC
21.5	780	BC	10.3	780	BC	3.3	780	BC	3.4	780	BC	27	780	BC	4.5	780	BC	29.7	780	BC	6.1	780	BC	4.9	780	BC	15.8	780	BC	16.6	780	BC	8.6	780	BC
21.6	781	BC	10.3	781	BC	3.3	781	BC	3.4	781	BC	27.1	781	BC	4.5	781	BC	29.9	781	BC	6.1	781	BC	4.9	781	BC	15.8	781	BC	16.6	781	BC	8.6	781	BC
21.6	782	BC	10.3	782	BC	3.3	782	BC	3.4	782	BC	27.2	782	BC	4.5	782	BC	30	782	BC	6.2	782	BC	4.9	782	BC	15.8	782	BC	16.6	782	BC	8.6	782	BC
21.6	783	BC	10.3	783	BC	3.3	783	BC	3.4	783	BC	27.3	783	BC	4.5	783	BC	30	783	BC	6.2	783	BC	5	783	BC	15.8	783	BC	16.7	783	BC	8.6	783	BC
21.7	784	BC	10.3	784	BC	3.3	784	BC	3.4	784	BC	27.3	784	BC	4.5	784	BC	30.1	784	BC	6.2	784	BC	5	784	BC	15.9	784	BC	16.7	784	BC	8.6	784	BC
21.7	785	BC	10.3	785	BC	3.3	785	BC	3.4	785	BC	27.4	785	BC	4.5	785	BC	30.2	785	BC	6.2	785	BC	5	785	BC	15.9	785	BC	16.7	785	BC	8.6	785	BC
21.7	786	BC	10.4	786	BC	3.3	786	BC	3.4	786	BC	27.4	786	BC	4.5	786	BC	30.4	786	BC	6.2	786	BC	5	786	BC	15.9	786	BC	16.7	786	BC	8.7	786	BC
21.7	787	BC	10.4	787	BC	3.3	787	BC	3.4	787	BC	27.5	787	BC	4.5	787	BC	30.5	787	BC	6.2	787	BC	5.1	787	BC	16	787	BC	16.7	787	BC	8.7	787	BC
21.8	788	BC	10.4	788	BC	3.3	788	BC	3.4	788	BC	27.6	788	BC	4.5	788	BC	30.5	788	BC	6.3	788	BC	5.1	788	BC	16	788	BC	16.8	788	BC	8.7	788	BC
21.8	789	BC	10.4	789	BC	3.4	789	BC	3.5	789	BC	27.7	789	BC	4.5	789	BC	30.7	789	BC	6.3	789	BC	5.1	789	BC	16	789	BC	16.8	789	BC	8.7	789	BC
21.8	790	BC	10.4	790	BC	3.4	790	BC	3.5	790	BC	27.7	790	BC	4.5	790	BC	30.7	790	BC	6.3	790	BC	5.1	790	BC	16	790	BC	16.8	790	BC	8.7	790	BC
21.8	791	BC	10.4	791	BC	3.4	791	BC	3.5	791	BC	27.8	791	BC	4.5	791	BC	30.7	791	BC	6.3	791	BC	5.1	791	BC	16.1	791	BC	16.8	791	BC	8.7	791	BC
21.9	792	BC	10.4	792	BC	3.4	792	BC	3.5	792	BC	27.8	792	BC	4.5	792	BC	30.8	792	BC	6.4	792	BC	5.1	792	BC	16.1	792	BC	16.8	792	BC	8.7	792	BC
21.9	793	BC	10.5	793	BC	3.4	793	BC	3.5	793	BC	27.9	793	BC	4.6	793	BC	30.9	793	BC	6.4	793	BC	5.2	793	BC	16.1	793	BC	16.9	793	BC	8.8	793	BC
21.9	794	BC	10.5	794	BC	3.4	794	BC	3.5	794	BC	28	794	BC	4.6	794	BC	31	794	BC	6.4	794	BC	5.2	794	BC	16.1	794	BC	16.9	794	BC	8.8	794	BC
21.9	795	BC	10.5	795	BC	3.4	795	BC	3.6	795	BC	28.1	795	BC	4.6	795	BC	31.1	795	BC	6.4	795	BC	5.2	795	BC	16.2	795	BC	16.9	795	BC	8.8	795	BC
22	796	BC	10.5	796	BC	3.4	796	BC	3.6	796	BC	28.2	796	BC	4.6	796	BC	31.2	796	BC	6.4	796	BC	5.2	796	BC	16.2	796	BC	16.9	796	BC	8.8	796	BC
22	797	BC	10.5	797	BC	3.4	797	BC	3.6	797	BC	28.2	797	BC	4.6	797	BC	31.4	797	BC	6.5	797	BC	5.3	797	BC	16.2	797	BC	17	797	BC	8.8	797	BC
22	798	BC	10.6	798	BC	3.4	798	BC	3.6	798	BC	28.3	798	BC	4.6	798	BC	31.4	798	BC	6.5	798	BC	5.3	798	BC	16.2	798	BC	17	798	BC	8.8	798	BC
22.1	799	BC	10.6	799	BC	3.4	799	BC	3.6	799	BC	28.4	799	BC	4.6	799	BC	31.4	799	BC	6.5	799	BC	5.3	799	BC	16.2	799	BC	17	799	BC	8.9	799	BC
22.1	800	BC	10.6	800	BC	3.4	800	BC	3.7	800	BC	28.5	800	BC	4.6	800	BC	31.6	800	BC	6.5	800	BC	5.3	800	BC	16.3	800	BC	17	800	BC	8.9	800	BC
22.1	801	BC	10.6	801	BC	3.4	801	BC	3.7	801	BC	28.7	801	BC	4.6	801	BC	31.7	801	BC	6.5	801	BC	5.3	801	BC	16.3	801	BC	17	801	BC	8.9	801	BC
22.2	802	BC	10.6	802	BC	3.4	802	BC	3.7	802	BC	28.8	802	BC	4.6	802	BC	31.7	802	BC	6.6	802	BC	5.3	802	BC	16.4	802	BC	17.1	802	BC	8.9	802	BC
22.2	803	BC	10.6	803	BC	3.4	803	BC	3.7	803	BC	28.9	803	BC	4.6	803	BC	31.8	803	BC	6.6	803	BC	5.3	803	BC	16.4	803	BC	17.1	803	BC	8.9	803	BC
22.2	804	BC	10.6	804	BC	3.4	804	BC	3.7	804	BC	29	804	BC	4.6	804	BC	31.9	804	BC	6.6	804	BC	5.4	804	BC	16.5	804	BC	17.1	804	BC	9	804	BC
22.2	805	BC	10.7	805	BC	3.4	805	BC	3.7	805	BC	29.1	805	BC	4.6	805	BC	31.9	805	BC	6.6	805	BC	5.4	805	BC	16.5	805	BC	17.1	805	BC	9	805	BC
22.2	806	BC	10.7	806	BC	3.4	806	BC	3.7	806	BC	29.2	806	BC	4.6	806	BC	32	806	BC	6.6	806	BC	5.4	806	BC	16.5	806	BC	17.2	806	BC	9	806	BC
22.3	807	BC	10.7	807	BC	3.5	807	BC	3.7	807	BC	29.3	807	BC	4.7	807	BC	32.2	807	BC	6.6	807	BC	5.4	807	BC	16.6	807	BC	17.2	807	BC	9	807	BC
22.3	808	BC	10.7	808	BC	3.5	808	BC	3.7	808	BC	29.4	808	BC	4.7	808	BC	32.2	808	BC	6.7	808	BC	5.4	808	BC	16.6	808	BC	17.2	808	BC	9.1	808	BC
22.3	809	BC	10.7	809	BC	3.5	809	BC	3.8	809	BC	29.5	809	BC	4.7	809	BC	32.3	809	BC	6.7	809	BC	5.4	809	BC	16.6	809	BC	17.2	809	BC	9.1	809	BC
22.3	810	BC	10.7	810	BC	3.5	810	BC	3.8	810	BC	29.6	810	BC	4.7	810	BC	32.4	810	BC	6.7	810	BC	5.5	810	BC	16.6	810	BC	17.2	810	BC	9.1	810	BC
22.4	811	BC	10.7	811	BC	3.5	811	BC	3.8	811	BC	29.7	811	BC	4.7	811	BC	32.5	811	BC	6.7	811	BC	5.5	811	BC	16.7	811	BC	17.3	811	BC	9.1	811	BC
22.5	812	BC	10.7	812	BC	3.5	812	BC	3.8	812	BC	29.8	812	BC	4.7	812	BC	32.5	812	BC	6.7	812	BC	5.5	812	BC	16.7	812	BC	17.3	812	BC	9.1	812	BC
22.5	813	BC	10.8	813	BC	3.5	813	BC	3.8	813	BC	29.9	813	BC	4.7	813	BC	32.6	813	BC	6.8	813	BC	5.5	813	BC	16.7	813	BC	17.3	813	BC	9.1	813	BC
22.5	814	BC	10.8	814	BC	3.5	814	BC	3.8	814	BC	30	814	BC	4.7	814	BC	32.7	814	BC	6.8	814	BC	5.5	814	BC	16.7	814	BC	17.3	814	BC	9.2	814	BC
22.5	815	BC	10.8	815	BC	3.5	815	BC	3.8	815	BC	30.2	815	BC	4.7	815	BC	32.8	815	BC	6.8	815	BC	5.5	815	BC	16.8	815	BC	17.3	815	BC	9.3	815	BC
22.6	816	BC	10.8	816	BC	3.5	816	BC	3.8	816	BC	30.4	816	BC	4.7	816	BC	32.9	816	BC	6.8	816	BC	5.6	816	BC	16.8	816	BC	17.4	816	BC	9.3	816	BC
22.6	817	BC	10.8	817	BC	3.5	817	BC	3.8	817	BC	30.4	817	BC	4.8	817	BC	33	817	BC	6.8	817	BC	5.6	817	BC	16.8	817	BC	17.4	817	BC	9.3	817	BC
24	818	BC	10.8	818	BC	3.5	818	BC	3.8	818	BC	30.5	818	BC	4.8	818	BC	33.1	818	BC	6.9	818	BC	5.6	818	BC	16.9	818	BC	17.4	818	BC	9.3	818	BC
24	819	BC	10.8	819	BC	3.5	819	BC	3.8	819	BC	30.6	819	BC	4.8	819	BC	33.2	819	BC	6.9	819	BC	5.6	819	BC	16.9	819	BC	17.4	819	BC	9.3	819	BC
24.1	820	BC	10.9	820	BC	3.5	820	BC	3.8	820	BC	30.7	820	BC	4.8	820	BC	33.3	820	BC	6.9	820	BC	5.6	820	BC	16.9	820	BC	17.4	820	BC	9.3	820	BC
24.1	821	BC	10.9	821	BC	3.5	821	BC	3.9	821	BC	30.9	821	BC	4.8	821	BC	33.4	821	BC	7	821	BC	5.6	821	BC	16.9	821	BC	17.5	821	BC	9.3	821	BC
24.1	822	BC	10.9	822	BC	3.5	822	BC	3.9	822	BC	31	822	BC	4.8	822	BC	33.5	822	BC	7	822	BC	5.7	822	BC	17	822	BC	17.5	822	BC	9.3	822	BC
24.1	823	BC	10.9	823	BC	3.6	823	BC	3.9	823	BC	31.2	823	BC	4.8	823	BC	33.6	823	BC	7	823	BC	5.7	823	BC	17	823	BC	17.5	823	BC	9.4	823	BC
24.1	824	BC	11	824	BC	3.6	824	BC	3.9	824	BC	31.3	824	BC	4.8	824	BC	33.7	824	BC	7	824	BC	5.7	824	BC	17	824	BC	17.5	824	BC	9.4	824	BC
24.2	825	BC	11	825	BC	3.6	825	BC	3.9	825	BC	31.4	825	BC	4.8	825	BC	33.8	825	BC	7	825	BC	5.7	825	BC	17	825	BC	17.5	825	BC	9.4	825	BC
24.2	826	BC	11	826	BC	3.6	826	BC	3.9	826	BC	31.5	826	BC	4.8	826	BC	33.9	826	BC	7.1	826	BC	5.7	826	BC	17.1	826	BC	17.6	826	BC	9.4	826	BC
24.3	827	BC	11	827	BC	3.6	827	BC	3.9	827	BC	31.6	827	BC	4.8	827	BC	34	827	BC	7.1	827	BC	5.8	827	BC	17.1	827	BC	17.6	827	BC	9.4	827	BC
24.3	828	BC	11	828	BC	3.6	828	BC	3.9	828	BC	31.8	828	BC	4.9	828	BC	34	828	BC	7.1	828	BC	5.8	828	BC	17.2	828	BC	17.6	828	BC	9.4	828	BC
24.3	829	BC	11	829	BC	3.6	829	BC	3.9	829	BC	32.1	829	BC	4.9	829	BC	34.2	829	BC	7.1	829	BC	5.8	829	BC	17.2	829	BC	17.6	829	BC	9.4	829	BC
24.3	830	BC	11	830	BC	3.6	830	BC	3.9	830	BC	32.2	830	BC	4.9	830	BC	34.3	830	BC	7.2	830	BC	5.8	830	BC	17.2	830	BC	17.7	830	BC	9.5	830	BC
24.4	831	BC	11.1	831	BC	3.6	831	BC	3.9	831	BC	32.4	831	BC	4.9	831	BC	34.4	831	BC	7.2	831	BC	5.8	831	BC	17.2	831	BC	17.7	831	BC	9.5	831	BC
24.4	832	BC	11.1	832	BC	3.6	832	BC	3.9	832	BC	32.5	832	BC	4.9	832	BC	34.5	832	BC	7.2	832	BC	5.9	832	BC	17.2	832	BC	17.7	832	BC	9.5	832	BC
24.4	833	BC	11.1	833	BC	3.6	833	BC	4	833	BC	32.7	833	BC	4.9	833	BC	34.6	833	BC	7.2	833	BC	5.9	833	BC	17.3	833	BC	17.7	833	BC	9.5	833	BC
24.4	834	BC	11.1	834	BC	3.6	834	BC	4	834	BC	32.8	834	BC	4.9	834	BC	34.7	834	BC	7.3	834	BC	5.9	834	BC	17.3	834	BC	17.7	834	BC	9.5	834	BC
24.5	835	BC	11.1	835	BC	3.6	835	BC	4	835	BC	32.9	835	BC	4.9	835	BC	34.8	835	BC	7.3	835	BC	6	835	BC	17.3	835	BC	17.8	835	BC	9.5	835	BC
24.5	836	BC	11.1	836	BC	3.6	836	BC	4	836	BC	33	836	BC	4.9	836	BC	35.1	836	BC	7.3	836	BC	6	836	BC	17.4	836	BC	17.8	836	BC	9.6	836	BC
24.5	837	BC	11.1	837	BC	3.6	837	BC	4	837	BC	33.2	837	BC	5	837	BC	35.2	837	BC	7.3	837	BC	6	837	BC	17.4	837	BC	18	837	BC	9.6	837	BC
24.5	838	BC	11.1	838	BC	3.6	838	BC	4	838	BC	33.2	838	BC	5	838	BC	35.3	838	BC	7.4	838	BC	6	838	BC	17.5	838	BC	18	838	BC	9.6	838	BC
24.6	839	BC	11.2	839	BC	3.6	839	BC	4	839	BC	33.5	839	BC	5	839	BC	35.3	839	BC	7.4	839	BC	6	839	BC	17.5	839	BC	18	839	BC	9.6	839	BC
24.6	840	BC	11.2	840	BC	3.6	840	BC	4	840	BC	33.6	840	BC	5	840	BC	35.5	840	BC	7.4	840	BC	6.1	840	BC	17.5	840	BC	18.1	840	BC	9.6	840	BC
24.6	841	BC	11.2	841	BC	3.6	841	BC	4	841	BC	33.8	841	BC	5	841	BC	35.5	841	BC	7.4	841	BC	6.1	841	BC	17.6	841	BC	18.1	841	BC	9.7	841	BC
24.6	842	BC	11.2	842	BC	3.7	842	BC	4.1	842	BC	33.8	842	BC	5	842	BC	35.6	842	BC	7.5	842	BC	6.1	842	BC	17.6	842	BC	18.1	842	BC	9.7	842	BC
24.7	843	BC	11.2	843	BC	3.7	843	BC	4.1	843	BC	34	843	BC	5	843	BC	35.7	843	BC	7.5	843	BC	6.2	843	BC	17.6	843	BC	18.1	843	BC	9.7	843	BC
24.7	844	BC	11.2	844	BC	3.7	844	BC	4.1	844	BC	34.1	844	BC	5	844	BC	35.8	844	BC	7.5	844	BC	6.2	844	BC	17.6	844	BC	18.1	844	BC	9.7	844	BC
24.7	845	BC	11.2	845	BC	3.7	845	BC	4.1	845	BC	34.2	845	BC	5	845	BC	36	845	BC	7.6	845	BC	6.2	845	BC	17.6	845	BC	18.2	845	BC	9.7	845	BC
24.8	846	BC	11.3	846	BC	3.7	846	BC	4.1	846	BC	34.4	846	BC	5	846	BC	36.1	846	BC	7.6	846	BC	6.2	846	BC	17.7	846	BC	18.2	846	BC	9.7	846	BC
24.8	847	BC	11.3	847	BC	3.7	847	BC	4.1	847	BC	34.6	847	BC	5	847	BC	36.3	847	BC	7.6	847	BC	6.2	847	BC	17.7	847	BC	18.2	847	BC	9.8	847	BC
24.8	848	BC	11.3	848	BC	3.7	848	BC	4.2	848	BC	34.9	848	BC	5.1	848	BC	36.4	848	BC	7.6	848	BC	6.3	848	BC	17.7	848	BC	18.2	848	BC	9.8	848	BC
24.9	849	BC	11.3	849	BC	3.7	849	BC	4.2	849	BC	35.1	849	BC	5.1	849	BC	36.4	849	BC	7.6	849	BC	6.3	849	BC	17.7	849	BC	18.3	849	BC	9.8	849	BC
24.9	850	BC	11.3	850	BC	3.7	850	BC	4.2	850	BC	35.2	850	BC	5.1	850	BC	36.6	850	BC	7.7	850	BC	6.3	850	BC	17.8	850	BC	18.3	850	BC	9.8	850	BC
24.9	851	BC	11.3	851	BC	3.7	851	BC	4.2	851	BC	35.3	851	BC	5.1	851	BC	36.7	851	BC	7.7	851	BC	6.3	851	BC	17.8	851	BC	18.3	851	BC	9.8	851	BC
25	852	BC	11.3	852	BC	3.7	852	BC	4.2	852	BC	35.6	852	BC	5.1	852	BC	36.9	852	BC	7.7	852	BC	6.4	852	BC	17.9	852	BC	18.3	852	BC	9.8	852	BC
25	853	BC	11.3	853	BC	3.7	853	BC	4.3	853	BC	35.8	853	BC	5.1	853	BC	37.1	853	BC	7.7	853	BC	6.4	853	BC	17.9	853	BC	18.3	853	BC	9.9	853	BC
25	854	BC	11.4	854	BC	3.8	854	BC	4.4	854	BC	36	854	BC	5.1	854	BC	37.1	854	BC	7.7	854	BC	6.4	854	BC	17.9	854	BC	18.4	854	BC	9.9	854	BC
25	855	BC	11.4	855	BC	3.8	855	BC	4.4	855	BC	36.1	855	BC	5.1	855	BC	37.2	855	BC	7.8	855	BC	6.5	855	BC	18	855	BC	18.4	855	BC	9.9	855	BC
25.1	856	BC	11.4	856	BC	3.8	856	BC	4.5	856	BC	36.3	856	BC	5.1	856	BC	37.4	856	BC	7.8	856	BC	6.5	856	BC	18	856	BC	18.4	856	BC	9.9	856	BC
25.1	857	BC	11.4	857	BC	3.8	857	BC	4.5	857	BC	36.5	857	BC	5.1	857	BC	37.4	857	BC	7.8	857	BC	6.5	857	BC	18.1	857	BC	18.4	857	BC	9.9	857	BC
25.1	858	BC	11.4	858	BC	3.8	858	BC	4.5	858	BC	36.7	858	BC	5.2	858	BC	37.6	858	BC	7.8	858	BC	6.6	858	BC	18.1	858	BC	18.4	858	BC	9.9	858	BC
25.2	859	BC	11.4	859	BC	3.8	859	BC	4.5	859	BC	36.9	859	BC	5.2	859	BC	37.8	859	BC	7.9	859	BC	6.6	859	BC	18.1	859	BC	18.5	859	BC	10	859	BC
25.2	860	BC	11.4	860	BC	3.8	860	BC	4.5	860	BC	37	860	BC	5.2	860	BC	37.9	860	BC	7.9	860	BC	6.6	860	BC	18.1	860	BC	18.5	860	BC	10	860	BC
25.3	861	BC	11.4	861	BC	3.8	861	BC	4.5	861	BC	37.1	861	BC	5.2	861	BC	38.1	861	BC	8	861	BC	6.6	861	BC	18.1	861	BC	18.5	861	BC	10	861	BC
25.3	862	BC	11.5	862	BC	3.8	862	BC	4.5	862	BC	37.3	862	BC	5.2	862	BC	38.4	862	BC	8	862	BC	6.7	862	BC	18.2	862	BC	18.5	862	BC	10	862	BC
25.3	863	BC	11.5	863	BC	3.8	863	BC	4.5	863	BC	37.5	863	BC	5.2	863	BC	38.5	863	BC	8	863	BC	6.7	863	BC	18.2	863	BC	18.6	863	BC	10	863	BC
25.3	864	BC	11.5	864	BC	3.8	864	BC	4.5	864	BC	37.7	864	BC	5.2	864	BC	38.7	864	BC	8	864	BC	6.7	864	BC	18.2	864	BC	18.6	864	BC	10.1	864	BC
25.4	865	BC	11.5	865	BC	3.8	865	BC	4.5	865	BC	37.9	865	BC	5.2	865	BC	38.9	865	BC	8.1	865	BC	6.7	865	BC	18.2	865	BC	18.6	865	BC	10.1	865	BC
25.4	866	BC	11.6	866	BC	3.9	866	BC	4.5	866	BC	38	866	BC	5.2	866	BC	38.9	866	BC	8.1	866	BC	6.8	866	BC	18.3	866	BC	18.6	866	BC	10.1	866	BC
25.4	867	BC	11.6	867	BC	3.9	867	BC	4.5	867	BC	38.2	867	BC	5.3	867	BC	39.1	867	BC	8.1	867	BC	6.8	867	BC	18.4	867	BC	18.7	867	BC	10.1	867	BC
25.4	868	BC	11.6	868	BC	3.9	868	BC	4.6	868	BC	38.4	868	BC	5.3	868	BC	39.2	868	BC	8.2	868	BC	6.8	868	BC	18.5	868	BC	18.7	868	BC	10.1	868	BC
25.5	869	BC	11.6	869	BC	3.9	869	BC	4.6	869	BC	38.7	869	BC	5.3	869	BC	39.3	869	BC	8.2	869	BC	6.9	869	BC	18.5	869	BC	18.7	869	BC	10.2	869	BC
25.5	870	BC	11.6	870	BC	3.9	870	BC	4.6	870	BC	38.9	870	BC	5.3	870	BC	39.5	870	BC	8.2	870	BC	6.9	870	BC	18.5	870	BC	18.7	870	BC	10.2	870	BC
25.5	871	BC	11.6	871	BC	3.9	871	BC	4.6	871	BC	39.2	871	BC	5.3	871	BC	39.7	871	BC	8.2	871	BC	6.9	871	BC	18.6	871	BC	18.7	871	BC	10.2	871	BC
25.6	872	BC	11.6	872	BC	3.9	872	BC	4.6	872	BC	39.5	872	BC	5.3	872	BC	40	872	BC	8.2	872	BC	7	872	BC	18.6	872	BC	18.8	872	BC	10.2	872	BC
25.6	873	BC	11.6	873	BC	3.9	873	BC	4.6	873	BC	39.7	873	BC	5.3	873	BC	40.1	873	BC	8.3	873	BC	7	873	BC	18.7	873	BC	18.8	873	BC	10.2	873	BC
25.6	874	BC	11.7	874	BC	3.9	874	BC	4.6	874	BC	39.9	874	BC	5.3	874	BC	40.2	874	BC	8.3	874	BC	7	874	BC	18.7	874	BC	18.8	874	BC	10.2	874	BC
25.7	875	BC	11.7	875	BC	3.9	875	BC	4.7	875	BC	40	875	BC	5.3	875	BC	40.3	875	BC	8.4	875	BC	7	875	BC	18.7	875	BC	18.8	875	BC	10.2	875	BC
25.7	876	BC	11.7	876	BC	3.9	876	BC	4.7	876	BC	40.1	876	BC	5.3	876	BC	40.5	876	BC	8.4	876	BC	7.1	876	BC	18.8	876	BC	18.9	876	BC	10.3	876	BC
25.7	877	BC	11.7	877	BC	3.9	877	BC	4.7	877	BC	40.3	877	BC	5.3	877	BC	40.7	877	BC	8.4	877	BC	7.1	877	BC	18.8	877	BC	18.9	877	BC	10.3	877	BC
25.7	878	BC	11.8	878	BC	3.9	878	BC	4.7	878	BC	40.5	878	BC	5.4	878	BC	40.8	878	BC	8.4	878	BC	7.1	878	BC	18.8	878	BC	18.9	878	BC	10.3	878	BC
25.8	879	BC	11.8	879	BC	3.9	879	BC	4.7	879	BC	40.7	879	BC	5.4	879	BC	41	879	BC	8.4	879	BC	7.1	879	BC	18.9	879	BC	18.9	879	BC	10.3	879	BC
25.8	880	BC	11.8	880	BC	3.9	880	BC	4.7	880	BC	40.8	880	BC	5.4	880	BC	41.2	880	BC	8.5	880	BC	7.2	880	BC	18.9	880	BC	19	880	BC	10.3	880	BC
25.8	881	BC	11.8	881	BC	4	881	BC	4.7	881	BC	41	881	BC	5.4	881	BC	41.3	881	BC	8.5	881	BC	7.2	881	BC	18.9	881	BC	19	881	BC	10.3	881	BC
25.9	882	BC	11.8	882	BC	4	882	BC	4.8	882	BC	41.3	882	BC	5.4	882	BC	41.5	882	BC	8.6	882	BC	7.2	882	BC	19	882	BC	19	882	BC	10.4	882	BC
25.9	883	BC	11.8	883	BC	4	883	BC	4.8	883	BC	41.6	883	BC	5.4	883	BC	41.8	883	BC	8.6	883	BC	7.2	883	BC	19	883	BC	19	883	BC	10.4	883	BC
26	884	BC	11.8	884	BC	4	884	BC	4.8	884	BC	41.9	884	BC	5.4	884	BC	42	884	BC	8.6	884	BC	7.3	884	BC	19	884	BC	19	884	BC	10.4	884	BC
26	885	BC	11.9	885	BC	4	885	BC	4.8	885	BC	42.1	885	BC	5.4	885	BC	42.1	885	BC	8.7	885	BC	7.3	885	BC	19	885	BC	19.1	885	BC	10.4	885	BC
26	886	BC	11.9	886	BC	4	886	BC	4.8	886	BC	42.3	886	BC	5.4	886	BC	42.3	886	BC	8.7	886	BC	7.3	886	BC	19.1	886	BC	19.1	886	BC	10.4	886	BC
26.1	887	BC	11.9	887	BC	4	887	BC	4.8	887	BC	42.6	887	BC	5.4	887	BC	42.4	887	BC	8.7	887	BC	7.3	887	BC	19.1	887	BC	19.1	887	BC	10.4	887	BC
26.1	888	BC	11.9	888	BC	4	888	BC	4.8	888	BC	42.9	888	BC	5.4	888	BC	42.6	888	BC	8.8	888	BC	7.4	888	BC	19.1	888	BC	19.1	888	BC	10.5	888	BC
26.1	889	BC	11.9	889	BC	4	889	BC	4.8	889	BC	43.2	889	BC	5.4	889	BC	42.9	889	BC	8.8	889	BC	7.4	889	BC	19.1	889	BC	19.2	889	BC	10.5	889	BC
26.2	890	BC	11.9	890	BC	4	890	BC	4.9	890	BC	43.5	890	BC	5.5	890	BC	43	890	BC	8.8	890	BC	7.4	890	BC	19.2	890	BC	19.2	890	BC	10.5	890	BC
26.2	891	BC	12	891	BC	4	891	BC	4.9	891	BC	43.7	891	BC	5.5	891	BC	43.4	891	BC	8.8	891	BC	7.5	891	BC	19.2	891	BC	19.2	891	BC	10.5	891	BC
26.2	892	BC	12	892	BC	4	892	BC	4.9	892	BC	44	892	BC	5.5	892	BC	43.6	892	BC	8.9	892	BC	7.5	892	BC	19.2	892	BC	19.2	892	BC	10.6	892	BC
26.2	893	BC	12	893	BC	4	893	BC	4.9	893	BC	44.1	893	BC	5.5	893	BC	43.9	893	BC	8.9	893	BC	7.5	893	BC	19.3	893	BC	19.2	893	BC	10.6	893	BC
26.3	894	BC	12	894	BC	4	894	BC	5	894	BC	44.3	894	BC	5.5	894	BC	44.2	894	BC	9	894	BC	7.6	894	BC	19.3	894	BC	19.3	894	BC	10.6	894	BC
26.3	895	BC	12.1	895	BC	4	895	BC	5	895	BC	44.6	895	BC	5.5	895	BC	44.4	895	BC	9	895	BC	7.6	895	BC	19.3	895	BC	19.3	895	BC	10.6	895	BC
26.3	896	BC	12.1	896	BC	4	896	BC	5	896	BC	44.9	896	BC	5.6	896	BC	44.7	896	BC	9.1	896	BC	7.6	896	BC	19.4	896	BC	19.3	896	BC	10.6	896	BC
26.4	897	BC	12.1	897	BC	4.1	897	BC	5	897	BC	45.2	897	BC	5.6	897	BC	45	897	BC	9.1	897	BC	7.7	897	BC	19.4	897	BC	19.3	897	BC	10.6	897	BC
26.4	898	BC	12.1	898	BC	4.1	898	BC	5.1	898	BC	45.5	898	BC	5.6	898	BC	45.1	898	BC	9.1	898	BC	7.7	898	BC	19.5	898	BC	19.3	898	BC	10.7	898	BC
26.5	899	BC	12.1	899	BC	4.1	899	BC	5.1	899	BC	45.7	899	BC	5.6	899	BC	45.5	899	BC	9.1	899	BC	7.7	899	BC	19.5	899	BC	19.4	899	BC	10.7	899	BC
26.5	900	BC	12.2	900	BC	4.1	900	BC	5.1	900	BC	46	900	BC	5.6	900	BC	45.7	900	BC	9.1	900	BC	7.8	900	BC	19.5	900	BC	19.4	900	BC	10.7	900	BC
26.5	901	BC	12.2	901	BC	4.1	901	BC	5.1	901	BC	46.4	901	BC	5.6	901	BC	45.9	901	BC	9.2	901	BC	7.8	901	BC	19.5	901	BC	19.4	901	BC	10.8	901	BC
26.5	902	BC	12.2	902	BC	4.1	902	BC	5.1	902	BC	46.7	902	BC	5.6	902	BC	46	902	BC	9.2	902	BC	7.8	902	BC	19.6	902	BC	19.4	902	BC	10.8	902	BC
26.6	903	BC	12.2	903	BC	4.1	903	BC	5.2	903	BC	46.9	903	BC	5.7	903	BC	46.3	903	BC	9.3	903	BC	7.9	903	BC	19.7	903	BC	19.4	903	BC	10.8	903	BC
26.6	904	BC	12.2	904	BC	4.1	904	BC	5.2	904	BC	47.4	904	BC	5.7	904	BC	46.5	904	BC	9.3	904	BC	7.9	904	BC	19.7	904	BC	19.5	904	BC	10.8	904	BC
26.7	905	BC	12.2	905	BC	4.1	905	BC	5.2	905	BC	47.8	905	BC	5.7	905	BC	46.8	905	BC	9.3	905	BC	7.9	905	BC	19.7	905	BC	19.5	905	BC	10.9	905	BC
26.7	906	BC	12.3	906	BC	4.1	906	BC	5.2	906	BC	48	906	BC	5.7	906	BC	47	906	BC	9.3	906	BC	8	906	BC	19.7	906	BC	19.5	906	BC	10.9	906	BC
26.7	907	BC	12.3	907	BC	4.1	907	BC	5.2	907	BC	48.4	907	BC	5.7	907	BC	47.3	907	BC	9.4	907	BC	8	907	BC	19.8	907	BC	19.5	907	BC	10.9	907	BC
26.7	908	BC	12.3	908	BC	4.1	908	BC	5.3	908	BC	48.8	908	BC	5.7	908	BC	47.5	908	BC	9.4	908	BC	8.1	908	BC	19.8	908	BC	19.6	908	BC	10.9	908	BC
26.8	909	BC	12.3	909	BC	4.2	909	BC	5.3	909	BC	49.1	909	BC	5.7	909	BC	47.8	909	BC	9.4	909	BC	8.1	909	BC	19.8	909	BC	19.6	909	BC	10.9	909	BC
26.8	910	BC	12.3	910	BC	4.2	910	BC	5.3	910	BC	49.3	910	BC	5.7	910	BC	48	910	BC	9.5	910	BC	8.1	910	BC	19.9	910	BC	19.6	910	BC	10.9	910	BC
26.9	911	BC	12.3	911	BC	4.2	911	BC	5.4	911	BC	49.7	911	BC	5.7	911	BC	48.3	911	BC	9.5	911	BC	8.2	911	BC	19.9	911	BC	19.6	911	BC	10.9	911	BC
26.9	912	BC	12.4	912	BC	4.2	912	BC	5.4	912	BC	50.1	912	BC	5.8	912	BC	48.6	912	BC	9.6	912	BC	8.2	912	BC	19.9	912	BC	19.6	912	BC	10.9	912	BC
26.9	913	BC	12.4	913	BC	4.2	913	BC	5.8	913	BC	50.5	913	BC	5.8	913	BC	48.8	913	BC	9.6	913	BC	8.2	913	BC	20	913	BC	19.7	913	BC	10.9	913	BC
26.9	914	BC	12.4	914	BC	4.2	914	BC	5.8	914	BC	51	914	BC	5.8	914	BC	49.1	914	BC	9.6	914	BC	8.3	914	BC	20	914	BC	19.7	914	BC	10.9	914	BC
27	915	BC	12.4	915	BC	4.2	915	BC	5.8	915	BC	51.5	915	BC	5.8	915	BC	49.5	915	BC	9.7	915	BC	8.3	915	BC	20.1	915	BC	19.7	915	BC	11	915	BC
27	916	BC	12.4	916	BC	4.2	916	BC	5.8	916	BC	52	916	BC	5.8	916	BC	49.8	916	BC	9.7	916	BC	8.3	916	BC	20.1	916	BC	19.7	916	BC	11	916	BC
27	917	BC	12.4	917	BC	4.2	917	BC	5.8	917	BC	52.5	917	BC	5.8	917	BC	50	917	BC	9.7	917	BC	8.4	917	BC	20.2	917	BC	19.7	917	BC	11	917	BC
27.1	918	BC	12.4	918	BC	4.2	918	BC	5.9	918	BC	52.9	918	BC	5.8	918	BC	50.4	918	BC	9.8	918	BC	8.4	918	BC	20.2	918	BC	19.8	918	BC	11.1	918	BC
27.1	919	BC	12.4	919	BC	4.3	919	BC	5.9	919	BC	53.4	919	BC	5.8	919	BC	50.7	919	BC	9.8	919	BC	8.5	919	BC	20.2	919	BC	19.8	919	BC	11.1	919	BC
27.1	920	BC	12.5	920	BC	4.3	920	BC	5.9	920	BC	53.8	920	BC	5.8	920	BC	51.2	920	BC	9.9	920	BC	8.5	920	BC	20.3	920	BC	19.8	920	BC	11.1	920	BC
27.2	921	BC	12.5	921	BC	4.3	921	BC	5.9	921	BC	54.4	921	BC	5.8	921	BC	51.5	921	BC	9.9	921	BC	8.5	921	BC	20.3	921	BC	19.8	921	BC	11.1	921	BC
27.2	922	BC	12.5	922	BC	4.3	922	BC	6	922	BC	54.6	922	BC	5.9	922	BC	52	922	BC	9.9	922	BC	8.6	922	BC	20.4	922	BC	19.8	922	BC	11.1	922	BC
27.2	923	BC	12.5	923	BC	4.3	923	BC	6	923	BC	55.2	923	BC	5.9	923	BC	52.4	923	BC	9.9	923	BC	8.6	923	BC	20.4	923	BC	19.9	923	BC	11.1	923	BC
27.2	924	BC	12.6	924	BC	4.3	924	BC	6	924	BC	55.8	924	BC	5.9	924	BC	52.8	924	BC	10	924	BC	8.7	924	BC	20.4	924	BC	19.9	924	BC	11.2	924	BC
27.2	925	BC	12.6	925	BC	4.3	925	BC	6	925	BC	56.3	925	BC	5.9	925	BC	53.2	925	BC	10	925	BC	8.7	925	BC	20.4	925	BC	19.9	925	BC	11.2	925	BC
27.3	926	BC	12.6	926	BC	4.3	926	BC	6	926	BC	57	926	BC	5.9	926	BC	53.6	926	BC	10	926	BC	8.8	926	BC	20.5	926	BC	19.9	926	BC	11.2	926	BC
27.3	927	BC	12.6	927	BC	4.3	927	BC	6.1	927	BC	57.5	927	BC	5.9	927	BC	54.1	927	BC	10.1	927	BC	8.8	927	BC	20.5	927	BC	20	927	BC	11.2	927	BC
27.3	928	BC	12.6	928	BC	4.3	928	BC	6.1	928	BC	58.3	928	BC	5.9	928	BC	54.6	928	BC	10.1	928	BC	8.8	928	BC	20.5	928	BC	20	928	BC	11.2	928	BC
27.4	929	BC	12.6	929	BC	4.3	929	BC	6.1	929	BC	58.9	929	BC	5.9	929	BC	55	929	BC	10.2	929	BC	8.9	929	BC	20.5	929	BC	20	929	BC	11.2	929	BC
27.4	930	BC	12.7	930	BC	4.3	930	BC	6.1	930	BC	59.3	930	BC	5.9	930	BC	55.5	930	BC	10.2	930	BC	8.9	930	BC	20.5	930	BC	20	930	BC	11.2	930	BC
27.4	931	BC	12.7	931	BC	4.3	931	BC	6.2	931	BC	60	931	BC	5.9	931	BC	56	931	BC	10.2	931	BC	9	931	BC	20.6	931	BC	20	931	BC	11.3	931	BC
27.4	932	BC	12.7	932	BC	4.3	932	BC	6.2	932	BC	60.7	932	BC	5.9	932	BC	56.4	932	BC	10.3	932	BC	9	932	BC	20.6	932	BC	20.1	932	BC	11.3	932	BC
27.5	933	BC	12.7	933	BC	4.4	933	BC	6.2	933	BC	61.4	933	BC	5.9	933	BC	57.1	933	BC	10.3	933	BC	9.1	933	BC	20.6	933	BC	20.1	933	BC	11.3	933	BC
27.5	934	BC	12.7	934	BC	4.4	934	BC	6.2	934	BC	62.2	934	BC	6	934	BC	57.7	934	BC	10.4	934	BC	9.1	934	BC	20.7	934	BC	20.5	934	BC	11.3	934	BC
27.5	935	BC	12.7	935	BC	4.4	935	BC	6.2	935	BC	62.8	935	BC	6	935	BC	58.3	935	BC	10.4	935	BC	9.1	935	BC	20.7	935	BC	20.5	935	BC	11.3	935	BC
27.5	936	BC	12.7	936	BC	4.4	936	BC	6.3	936	BC	63.9	936	BC	6	936	BC	58.8	936	BC	10.4	936	BC	9.2	936	BC	20.7	936	BC	20.5	936	BC	11.4	936	BC
27.6	937	BC	12.8	937	BC	4.4	937	BC	6.3	937	BC	64.8	937	BC	6	937	BC	59.4	937	BC	10.5	937	BC	9.3	937	BC	20.7	937	BC	20.5	937	BC	11.4	937	BC
27.6	938	BC	12.8	938	BC	4.4	938	BC	6.3	938	BC	65.9	938	BC	6	938	BC	60	938	BC	10.5	938	BC	9.3	938	BC	20.8	938	BC	20.6	938	BC	11.4	938	BC
27.6	939	BC	12.8	939	BC	4.4	939	BC	6.4	939	BC	66.8	939	BC	6	939	BC	60.6	939	BC	10.5	939	BC	9.3	939	BC	20.8	939	BC	20.6	939	BC	11.5	939	BC
27.6	940	BC	12.8	940	BC	4.4	940	BC	6.4	940	BC	68.1	940	BC	6	940	BC	61.3	940	BC	10.6	940	BC	9.4	940	BC	20.8	940	BC	20.6	940	BC	11.5	940	BC
27.7	941	BC	12.8	941	BC	4.4	941	BC	6.4	941	BC	69.3	941	BC	6	941	BC	61.9	941	BC	10.6	941	BC	9.5	941	BC	20.8	941	BC	20.6	941	BC	11.5	941	BC
27.7	942	BC	12.8	942	BC	4.4	942	BC	6.4	942	BC	70.3	942	BC	6.1	942	BC	62.6	942	BC	10.6	942	BC	9.5	942	BC	20.9	942	BC	20.7	942	BC	11.5	942	BC
27.7	943	BC	12.9	943	BC	4.4	943	BC	6.5	943	BC	71.7	943	BC	6.1	943	BC	63.3	943	BC	10.7	943	BC	9.5	943	BC	21	943	BC	20.7	943	BC	11.6	943	BC
27.7	944	BC	12.9	944	BC	4.4	944	BC	6.5	944	BC	73	944	BC	6.1	944	BC	63.8	944	BC	10.7	944	BC	9.6	944	BC	21	944	BC	20.7	944	BC	11.6	944	BC
27.8	945	BC	12.9	945	BC	4.4	945	BC	6.5	945	BC	74.8	945	BC	6.1	945	BC	64.4	945	BC	10.7	945	BC	9.7	945	BC	21.1	945	BC	20.7	945	BC	11.6	945	BC
27.8	946	BC	12.9	946	BC	4.4	946	BC	6.5	946	BC	76.8	946	BC	6.1	946	BC	64.9	946	BC	10.8	946	BC	9.7	946	BC	21.1	946	BC	20.8	946	BC	11.6	946	BC
27.8	947	BC	12.9	947	BC	4.4	947	BC	6.6	947	BC	78.9	947	BC	6.1	947	BC	65.5	947	BC	10.8	947	BC	9.8	947	BC	21.1	947	BC	20.8	947	BC	11.7	947	BC
27.8	948	BC	12.9	948	BC	4.4	948	BC	6.6	948	BC	82.1	948	BC	6.1	948	BC	66.2	948	BC	10.8	948	BC	9.8	948	BC	21.1	948	BC	20.8	948	BC	11.7	948	BC
27.9	949	BC	13	949	BC	4.5	949	BC	6.6	949	BC	86.7	949	BC	6.1	949	BC	67	949	BC	10.9	949	BC	9.8	949	BC	21.2	949	BC	20.8	949	BC	11.7	949	BC
27.9	950	BC	13	950	BC	4.5	950	BC	6.6	950	BC	100	950	BC	6.1	950	BC	68	950	BC	10.9	950	BC	9.9	950	BC	21.2	950	BC	20.8	950	BC	11.7	950	BC
27.9	951	BC	13	951	BC	4.5	951	BC	6.7	951	BC	0	1	DC	6.1	951	BC	69.2	951	BC	10.9	951	BC	9.9	951	BC	21.2	951	BC	20.9	951	BC	11.7	951	BC
28	952	BC	13	952	BC	4.5	952	BC	6.7	952	BC	0	2	DC	6.2	952	BC	70.2	952	BC	11	952	BC	10	952	BC	21.3	952	BC	20.9	952	BC	11.7	952	BC
28	953	BC	13	953	BC	4.5	953	BC	6.7	953	BC	0.1	3	DC	6.2	953	BC	71.6	953	BC	11	953	BC	10	953	BC	21.3	953	BC	20.9	953	BC	11.8	953	BC
28	954	BC	13	954	BC	4.5	954	BC	6.7	954	BC	0.1	4	DC	6.2	954	BC	72.7	954	BC	11.1	954	BC	10.1	954	BC	21.3	954	BC	20.9	954	BC	11.8	954	BC
28.1	955	BC	13.1	955	BC	4.5	955	BC	6.7	955	BC	0.1	5	DC	6.2	955	BC	74.3	955	BC	11.1	955	BC	10.1	955	BC	21.3	955	BC	21	955	BC	11.8	955	BC
28.1	956	BC	13.1	956	BC	4.5	956	BC	6.8	956	BC	0.1	6	DC	6.2	956	BC	75.8	956	BC	11.1	956	BC	10.2	956	BC	21.3	956	BC	21	956	BC	11.8	956	BC
28.1	957	BC	13.1	957	BC	4.5	957	BC	6.8	957	BC	0.2	7	DC	6.2	957	BC	78.3	957	BC	11.2	957	BC	10.2	957	BC	21.4	957	BC	21	957	BC	11.9	957	BC
28.2	958	BC	13.1	958	BC	4.5	958	BC	6.8	958	BC	0.2	8	DC	6.2	958	BC	81.3	958	BC	11.2	958	BC	10.3	958	BC	21.4	958	BC	21	958	BC	12.1	958	BC
28.2	959	BC	13.1	959	BC	4.5	959	BC	6.8	959	BC	0.2	9	DC	6.2	959	BC	85.6	959	BC	11.3	959	BC	10.3	959	BC	21.5	959	BC	21	959	BC	12.1	959	BC
28.2	960	BC	13.1	960	BC	4.6	960	BC	6.8	960	BC	0.2	10	DC	6.3	960	BC	100	960	BC	11.3	960	BC	10.4	960	BC	21.5	960	BC	21.1	960	BC	12.1	960	BC
28.2	961	BC	13.1	961	BC	4.6	961	BC	6.9	961	BC	0.2	11	DC	6.3	961	BC	0	1	DC	11.4	961	BC	10.5	961	BC	21.6	961	BC	21.1	961	BC	12.2	961	BC
28.3	962	BC	13.2	962	BC	4.6	962	BC	6.9	962	BC	0.3	12	DC	6.3	962	BC	0	2	DC	11.4	962	BC	10.5	962	BC	21.6	962	BC	21.1	962	BC	12.2	962	BC
28.3	963	BC	13.2	963	BC	4.6	963	BC	6.9	963	BC	0.3	13	DC	6.3	963	BC	0.1	3	DC	11.4	963	BC	10.6	963	BC	21.7	963	BC	21.1	963	BC	12.2	963	BC
28.4	964	BC	13.2	964	BC	4.6	964	BC	6.9	964	BC	0.3	14	DC	6.3	964	BC	0.1	4	DC	11.5	964	BC	10.6	964	BC	21.8	964	BC	21.2	964	BC	12.2	964	BC
28.4	965	BC	13.2	965	BC	4.6	965	BC	6.9	965	BC	0.3	15	DC	6.3	965	BC	0.1	5	DC	11.5	965	BC	10.7	965	BC	21.8	965	BC	21.2	965	BC	12.2	965	BC
28.4	966	BC	13.2	966	BC	4.6	966	BC	7	966	BC	0.3	16	DC	6.3	966	BC	0.1	6	DC	11.6	966	BC	10.7	966	BC	21.8	966	BC	21.2	966	BC	12.3	966	BC
28.4	967	BC	13.2	967	BC	4.6	967	BC	7	967	BC	0.4	17	DC	6.3	967	BC	0.2	7	DC	11.6	967	BC	10.8	967	BC	21.9	967	BC	21.3	967	BC	12.3	967	BC
28.5	968	BC	13.2	968	BC	4.6	968	BC	7	968	BC	0.4	18	DC	6.3	968	BC	0.2	8	DC	11.7	968	BC	10.8	968	BC	21.9	968	BC	21.3	968	BC	12.4	968	BC
28.5	969	BC	13.2	969	BC	4.6	969	BC	7.1	969	BC	0.4	19	DC	6.4	969	BC	0.2	9	DC	11.7	969	BC	10.9	969	BC	22	969	BC	21.3	969	BC	12.4	969	BC
28.5	970	BC	13.3	970	BC	4.7	970	BC	7.1	970	BC	0.4	20	DC	6.4	970	BC	0.2	10	DC	11.8	970	BC	11	970	BC	22	970	BC	21.4	970	BC	12.4	970	BC
28.5	971	BC	13.3	971	BC	4.7	971	BC	7.2	971	BC	0.5	21	DC	6.4	971	BC	0.3	11	DC	11.8	971	BC	11	971	BC	22	971	BC	21.4	971	BC	12.5	971	BC
28.5	972	BC	13.3	972	BC	4.7	972	BC	7.4	972	BC	0.5	22	DC	6.4	972	BC	0.3	12	DC	11.9	972	BC	11.1	972	BC	22.1	972	BC	21.4	972	BC	12.5	972	BC
28.6	973	BC	13.3	973	BC	4.7	973	BC	7.4	973	BC	0.5	23	DC	6.4	973	BC	0.3	13	DC	11.9	973	BC	11.1	973	BC	22.2	973	BC	21.4	973	BC	12.5	973	BC
28.6	974	BC	13.3	974	BC	4.7	974	BC	7.4	974	BC	0.5	24	DC	6.4	974	BC	0.3	14	DC	11.9	974	BC	11.1	974	BC	22.2	974	BC	21.4	974	BC	12.6	974	BC
28.6	975	BC	13.3	975	BC	4.7	975	BC	7.5	975	BC	0.6	25	DC	6.4	975	BC	0.3	15	DC	12	975	BC	11.2	975	BC	22.2	975	BC	21.5	975	BC	12.6	975	BC
28.7	976	BC	13.3	976	BC	4.7	976	BC	7.5	976	BC	0.6	26	DC	6.5	976	BC	0.4	16	DC	12.1	976	BC	11.3	976	BC	22.3	976	BC	21.5	976	BC	12.6	976	BC
28.7	977	BC	13.4	977	BC	4.7	977	BC	7.6	977	BC	0.6	27	DC	6.5	977	BC	0.4	17	DC	12.1	977	BC	11.3	977	BC	22.3	977	BC	21.5	977	BC	12.7	977	BC
28.8	978	BC	13.6	978	BC	4.7	978	BC	7.6	978	BC	0.6	28	DC	6.5	978	BC	0.4	18	DC	12.2	978	BC	11.4	978	BC	22.3	978	BC	21.5	978	BC	12.7	978	BC
28.8	979	BC	13.6	979	BC	4.7	979	BC	7.6	979	BC	0.7	29	DC	6.5	979	BC	0.4	19	DC	12.2	979	BC	11.5	979	BC	22.4	979	BC	21.5	979	BC	12.7	979	BC
28.8	980	BC	13.6	980	BC	4.7	980	BC	7.7	980	BC	0.7	30	DC	6.5	980	BC	0.5	20	DC	12.2	980	BC	11.5	980	BC	22.4	980	BC	21.6	980	BC	12.7	980	BC
31.6	981	BC	13.6	981	BC	4.7	981	BC	7.7	981	BC	0.7	31	DC	6.5	981	BC	0.5	21	DC	12.2	981	BC	11.6	981	BC	22.4	981	BC	21.6	981	BC	12.7	981	BC
31.7	982	BC	13.6	982	BC	4.8	982	BC	7.7	982	BC	0.7	32	DC	6.6	982	BC	0.5	22	DC	12.3	982	BC	11.7	982	BC	22.4	982	BC	21.6	982	BC	12.8	982	BC
31.7	983	BC	13.6	983	BC	4.8	983	BC	7.8	983	BC	0.8	33	DC	6.6	983	BC	0.5	23	DC	12.3	983	BC	11.7	983	BC	22.4	983	BC	21.6	983	BC	12.8	983	BC
31.7	984	BC	13.7	984	BC	4.8	984	BC	7.8	984	BC	0.8	34	DC	6.6	984	BC	0.6	24	DC	12.4	984	BC	11.7	984	BC	22.5	984	BC	21.7	984	BC	12.8	984	BC
31.8	985	BC	13.7	985	BC	4.8	985	BC	7.8	985	BC	0.8	35	DC	6.6	985	BC	0.6	25	DC	12.4	985	BC	11.8	985	BC	22.5	985	BC	21.7	985	BC	12.8	985	BC
31.8	986	BC	13.7	986	BC	4.8	986	BC	7.9	986	BC	0.8	36	DC	6.6	986	BC	0.6	26	DC	12.5	986	BC	11.9	986	BC	22.6	986	BC	21.7	986	BC	12.9	986	BC
31.8	987	BC	13.7	987	BC	4.8	987	BC	7.9	987	BC	0.8	37	DC	6.6	987	BC	0.7	27	DC	12.6	987	BC	11.9	987	BC	22.6	987	BC	21.7	987	BC	12.9	987	BC
31.8	988	BC	13.7	988	BC	4.8	988	BC	7.9	988	BC	0.9	38	DC	6.6	988	BC	0.7	28	DC	12.6	988	BC	12	988	BC	22.7	988	BC	21.7	988	BC	12.9	988	BC
31.9	989	BC	13.8	989	BC	4.8	989	BC	8	989	BC	0.9	39	DC	6.6	989	BC	0.7	29	DC	12.6	989	BC	12.1	989	BC	22.7	989	BC	21.8	989	BC	13	989	BC
31.9	990	BC	13.8	990	BC	4.8	990	BC	8	990	BC	0.9	40	DC	6.6	990	BC	0.7	30	DC	12.7	990	BC	12.1	990	BC	22.8	990	BC	21.8	990	BC	13	990	BC
32	991	BC	13.8	991	BC	4.8	991	BC	8	991	BC	0.9	41	DC	6.7	991	BC	0.8	31	DC	12.8	991	BC	12.2	991	BC	22.8	991	BC	21.9	991	BC	13	991	BC
32	992	BC	13.8	992	BC	4.8	992	BC	8.1	992	BC	0.9	42	DC	6.7	992	BC	0.8	32	DC	12.8	992	BC	12.2	992	BC	22.8	992	BC	21.9	992	BC	13	992	BC
32.1	993	BC	13.8	993	BC	4.8	993	BC	8.1	993	BC	1	43	DC	6.7	993	BC	0.8	33	DC	12.8	993	BC	12.3	993	BC	22.9	993	BC	21.9	993	BC	13.1	993	BC
32.1	994	BC	13.8	994	BC	4.8	994	BC	8.1	994	BC	1	44	DC	6.7	994	BC	0.8	34	DC	12.9	994	BC	12.3	994	BC	23	994	BC	21.9	994	BC	13.1	994	BC
32.2	995	BC	13.9	995	BC	4.8	995	BC	8.2	995	BC	1	45	DC	6.7	995	BC	0.8	35	DC	12.9	995	BC	12.4	995	BC	23	995	BC	22	995	BC	13.1	995	BC
32.2	996	BC	13.9	996	BC	4.9	996	BC	8.2	996	BC	1.1	46	DC	6.7	996	BC	0.9	36	DC	13	996	BC	12.5	996	BC	23	996	BC	22	996	BC	13.1	996	BC
32.3	997	BC	13.9	997	BC	4.9	997	BC	8.3	997	BC	1.1	47	DC	6.7	997	BC	0.9	37	DC	13	997	BC	12.5	997	BC	23	997	BC	22	997	BC	13.1	997	BC
32.3	998	BC	13.9	998	BC	4.9	998	BC	8.3	998	BC	1.1	48	DC	6.7	998	BC	0.9	38	DC	13.1	998	BC	12.6	998	BC	23.1	998	BC	22	998	BC	13.1	998	BC
32.3	999	BC	13.9	999	BC	4.9	999	BC	8.4	999	BC	1.1	49	DC	6.7	999	BC	0.9	39	DC	13.2	999	BC	12.7	999	BC	23.1	999	BC	22.1	999	BC	13.2	999	BC
32.3	1000	BC	13.9	1000	BC	4.9	1000	BC	8.4	1000	BC	1.2	50	DC	6.8	1000	BC	1	40	DC	13.2	1000	BC	12.7	1000	BC	23.2	1000	BC	22.1	1000	BC	13.2	1000	BC
32.3	1001	BC	13.9	1001	BC	4.9	1001	BC	8.4	1001	BC	1.2	51	DC	6.8	1001	BC	1	41	DC	13.2	1001	BC	12.8	1001	BC	23.2	1001	BC	22.1	1001	BC	13.2	1001	BC
32.4	1002	BC	14	1002	BC	4.9	1002	BC	8.5	1002	BC	1.2	52	DC	6.8	1002	BC	1	42	DC	13.3	1002	BC	12.9	1002	BC	23.2	1002	BC	22.2	1002	BC	13.2	1002	BC
32.4	1003	BC	14	1003	BC	4.9	1003	BC	8.5	1003	BC	1.2	53	DC	6.8	1003	BC	1	43	DC	13.4	1003	BC	13	1003	BC	23.3	1003	BC	22.2	1003	BC	13.3	1003	BC
32.4	1004	BC	14	1004	BC	4.9	1004	BC	8.6	1004	BC	1.3	54	DC	6.8	1004	BC	1.1	44	DC	13.4	1004	BC	13	1004	BC	23.3	1004	BC	22.2	1004	BC	13.3	1004	BC
32.5	1005	BC	14	1005	BC	4.9	1005	BC	8.6	1005	BC	1.3	55	DC	6.8	1005	BC	1.1	45	DC	13.4	1005	BC	13.1	1005	BC	23.4	1005	BC	22.2	1005	BC	13.4	1005	BC
32.5	1006	BC	14	1006	BC	4.9	1006	BC	8.7	1006	BC	1.3	56	DC	6.8	1006	BC	1.2	46	DC	13.5	1006	BC	13.1	1006	BC	23.5	1006	BC	22.3	1006	BC	13.4	1006	BC
32.5	1007	BC	14	1007	BC	4.9	1007	BC	8.7	1007	BC	1.4	57	DC	6.9	1007	BC	1.2	47	DC	13.6	1007	BC	13.2	1007	BC	23.5	1007	BC	22.3	1007	BC	13.4	1007	BC
32.6	1008	BC	14.1	1008	BC	4.9	1008	BC	8.8	1008	BC	1.4	58	DC	6.9	1008	BC	1.2	48	DC	13.6	1008	BC	13.3	1008	BC	23.6	1008	BC	22.3	1008	BC	13.4	1008	BC
32.6	1009	BC	14.1	1009	BC	5	1009	BC	8.8	1009	BC	1.4	59	DC	6.9	1009	BC	1.2	49	DC	13.7	1009	BC	13.3	1009	BC	23.6	1009	BC	22.3	1009	BC	13.4	1009	BC
32.6	1010	BC	14.1	1010	BC	5	1010	BC	8.9	1010	BC	1.4	60	DC	6.9	1010	BC	1.3	50	DC	13.7	1010	BC	13.4	1010	BC	23.6	1010	BC	22.3	1010	BC	13.5	1010	BC
32.7	1011	BC	14.1	1011	BC	5	1011	BC	9	1011	BC	1.5	61	DC	6.9	1011	BC	1.3	51	DC	13.8	1011	BC	13.4	1011	BC	23.6	1011	BC	22.4	1011	BC	13.5	1011	BC
32.7	1012	BC	14.1	1012	BC	5	1012	BC	9	1012	BC	1.5	62	DC	6.9	1012	BC	1.3	52	DC	13.8	1012	BC	13.5	1012	BC	23.7	1012	BC	22.4	1012	BC	13.5	1012	BC
32.7	1013	BC	14.1	1013	BC	5	1013	BC	9.1	1013	BC	1.5	63	DC	6.9	1013	BC	1.3	53	DC	13.9	1013	BC	13.6	1013	BC	23.7	1013	BC	22.4	1013	BC	13.5	1013	BC
32.8	1014	BC	14.1	1014	BC	5	1014	BC	9.1	1014	BC	1.5	64	DC	6.9	1014	BC	1.3	54	DC	13.9	1014	BC	13.7	1014	BC	23.8	1014	BC	22.4	1014	BC	13.6	1014	BC
32.8	1015	BC	14.1	1015	BC	5	1015	BC	9.2	1015	BC	1.6	65	DC	7	1015	BC	1.4	55	DC	14	1015	BC	13.7	1015	BC	23.8	1015	BC	22.5	1015	BC	13.6	1015	BC
32.9	1016	BC	14.2	1016	BC	5	1016	BC	9.2	1016	BC	1.6	66	DC	7	1016	BC	1.4	56	DC	14	1016	BC	13.8	1016	BC	23.9	1016	BC	22.5	1016	BC	13.6	1016	BC
32.9	1017	BC	14.2	1017	BC	5	1017	BC	9.2	1017	BC	1.6	67	DC	7	1017	BC	1.4	57	DC	14.1	1017	BC	13.9	1017	BC	24	1017	BC	22.5	1017	BC	13.6	1017	BC
32.9	1018	BC	14.2	1018	BC	5	1018	BC	9.3	1018	BC	1.7	68	DC	7	1018	BC	1.4	58	DC	14.1	1018	BC	14	1018	BC	24	1018	BC	22.5	1018	BC	13.7	1018	BC
33	1019	BC	14.2	1019	BC	5	1019	BC	9.3	1019	BC	1.7	69	DC	7	1019	BC	1.5	59	DC	14.2	1019	BC	14	1019	BC	24	1019	BC	22.6	1019	BC	13.7	1019	BC
33	1020	BC	14.2	1020	BC	5	1020	BC	9.4	1020	BC	1.7	70	DC	7	1020	BC	1.5	60	DC	14.2	1020	BC	14.1	1020	BC	24.1	1020	BC	22.6	1020	BC	13.7	1020	BC
33	1021	BC	14.3	1021	BC	5.1	1021	BC	9.5	1021	BC	1.7	71	DC	7	1021	BC	1.5	61	DC	14.3	1021	BC	14.2	1021	BC	24.2	1021	BC	22.6	1021	BC	13.7	1021	BC
33.1	1022	BC	14.3	1022	BC	5.1	1022	BC	9.5	1022	BC	1.8	72	DC	7	1022	BC	1.6	62	DC	14.3	1022	BC	14.3	1022	BC	24.2	1022	BC	22.6	1022	BC	13.8	1022	BC
33.1	1023	BC	14.3	1023	BC	5.1	1023	BC	9.6	1023	BC	1.8	73	DC	7.1	1023	BC	1.6	63	DC	14.4	1023	BC	14.3	1023	BC	24.3	1023	BC	22.6	1023	BC	13.8	1023	BC
33.1	1024	BC	14.3	1024	BC	5.1	1024	BC	9.7	1024	BC	1.8	74	DC	7.1	1024	BC	1.6	64	DC	14.4	1024	BC	14.4	1024	BC	24.4	1024	BC	22.7	1024	BC	13.8	1024	BC
33.1	1025	BC	14.3	1025	BC	5.1	1025	BC	9.8	1025	BC	1.9	75	DC	7.1	1025	BC	1.7	65	DC	14.5	1025	BC	14.4	1025	BC	24.4	1025	BC	22.7	1025	BC	13.9	1025	BC
33.2	1026	BC	14.3	1026	BC	5.1	1026	BC	9.8	1026	BC	1.9	76	DC	7.1	1026	BC	1.7	66	DC	14.6	1026	BC	14.5	1026	BC	24.4	1026	BC	22.7	1026	BC	13.9	1026	BC
33.2	1027	BC	14.3	1027	BC	5.1	1027	BC	9.9	1027	BC	1.9	77	DC	7.1	1027	BC	1.7	67	DC	14.6	1027	BC	14.6	1027	BC	24.5	1027	BC	22.7	1027	BC	13.9	1027	BC
33.2	1028	BC	14.3	1028	BC	5.1	1028	BC	10	1028	BC	1.9	78	DC	7.1	1028	BC	1.8	68	DC	14.7	1028	BC	14.7	1028	BC	24.6	1028	BC	22.7	1028	BC	13.9	1028	BC
33.3	1029	BC	14.4	1029	BC	5.1	1029	BC	10.1	1029	BC	1.9	79	DC	7.1	1029	BC	1.8	69	DC	14.7	1029	BC	14.7	1029	BC	24.6	1029	BC	22.8	1029	BC	14	1029	BC
33.3	1030	BC	14.4	1030	BC	5.2	1030	BC	10.1	1030	BC	2	80	DC	7.1	1030	BC	1.9	70	DC	14.8	1030	BC	14.9	1030	BC	24.7	1030	BC	22.8	1030	BC	14	1030	BC
33.3	1031	BC	14.4	1031	BC	5.2	1031	BC	10.2	1031	BC	2	81	DC	7.2	1031	BC	2	71	DC	14.8	1031	BC	14.9	1031	BC	24.8	1031	BC	22.8	1031	BC	14	1031	BC
33.3	1032	BC	14.4	1032	BC	5.2	1032	BC	10.8	1032	BC	2	82	DC	7.2	1032	BC	2	72	DC	14.9	1032	BC	15	1032	BC	24.8	1032	BC	22.8	1032	BC	14.1	1032	BC
33.4	1033	BC	14.4	1033	BC	5.2	1033	BC	10.9	1033	BC	2.1	83	DC	7.2	1033	BC	2	73	DC	14.9	1033	BC	15.1	1033	BC	24.9	1033	BC	22.8	1033	BC	14.1	1033	BC
33.4	1034	BC	14.4	1034	BC	5.2	1034	BC	10.9	1034	BC	2.1	84	DC	7.2	1034	BC	2	74	DC	15	1034	BC	15.1	1034	BC	24.9	1034	BC	22.9	1034	BC	14.1	1034	BC
33.4	1035	BC	14.4	1035	BC	5.2	1035	BC	11	1035	BC	2.1	85	DC	7.2	1035	BC	2.1	75	DC	15.1	1035	BC	15.2	1035	BC	25	1035	BC	22.9	1035	BC	14.2	1035	BC
33.5	1036	BC	14.5	1036	BC	5.2	1036	BC	11.1	1036	BC	2.2	86	DC	7.2	1036	BC	2.1	76	DC	15.1	1036	BC	15.3	1036	BC	26.2	1036	BC	22.9	1036	BC	14.2	1036	BC
33.5	1037	BC	14.5	1037	BC	5.2	1037	BC	11.2	1037	BC	2.2	87	DC	7.3	1037	BC	2.1	77	DC	15.2	1037	BC	15.4	1037	BC	26.3	1037	BC	23	1037	BC	14.2	1037	BC
33.6	1038	BC	14.5	1038	BC	5.2	1038	BC	11.2	1038	BC	2.2	88	DC	7.3	1038	BC	2.2	78	DC	15.3	1038	BC	15.5	1038	BC	26.3	1038	BC	23	1038	BC	14.2	1038	BC
33.6	1039	BC	14.5	1039	BC	5.3	1039	BC	11.3	1039	BC	2.2	89	DC	7.3	1039	BC	2.3	79	DC	15.3	1039	BC	15.6	1039	BC	26.4	1039	BC	23	1039	BC	14.2	1039	BC
33.6	1040	BC	14.5	1040	BC	5.3	1040	BC	11.4	1040	BC	2.3	90	DC	7.3	1040	BC	2.4	80	DC	15.4	1040	BC	15.7	1040	BC	26.4	1040	BC	23	1040	BC	14.3	1040	BC
33.7	1041	BC	14.6	1041	BC	5.3	1041	BC	11.5	1041	BC	2.3	91	DC	7.3	1041	BC	2.4	81	DC	15.4	1041	BC	15.7	1041	BC	26.4	1041	BC	23.1	1041	BC	14.3	1041	BC
33.7	1042	BC	14.6	1042	BC	5.3	1042	BC	11.6	1042	BC	2.3	92	DC	7.3	1042	BC	2.5	82	DC	15.5	1042	BC	15.8	1042	BC	26.5	1042	BC	23.1	1042	BC	14.3	1042	BC
33.7	1043	BC	14.6	1043	BC	5.3	1043	BC	11.7	1043	BC	2.3	93	DC	7.3	1043	BC	2.6	83	DC	15.6	1043	BC	15.9	1043	BC	26.5	1043	BC	23.1	1043	BC	14.4	1043	BC
33.7	1044	BC	14.6	1044	BC	5.3	1044	BC	11.8	1044	BC	2.4	94	DC	7.4	1044	BC	2.6	84	DC	15.6	1044	BC	15.9	1044	BC	26.5	1044	BC	23.2	1044	BC	14.4	1044	BC
33.8	1045	BC	14.7	1045	BC	5.3	1045	BC	11.9	1045	BC	2.5	95	DC	7.4	1045	BC	2.7	85	DC	15.7	1045	BC	16	1045	BC	26.5	1045	BC	23.2	1045	BC	14.4	1045	BC
33.8	1046	BC	14.7	1046	BC	5.3	1046	BC	12	1046	BC	2.5	96	DC	7.4	1046	BC	2.7	86	DC	15.7	1046	BC	16.1	1046	BC	26.6	1046	BC	23.2	1046	BC	14.4	1046	BC
33.8	1047	BC	14.7	1047	BC	5.3	1047	BC	12.1	1047	BC	2.5	97	DC	7.4	1047	BC	2.7	87	DC	15.8	1047	BC	16.2	1047	BC	26.6	1047	BC	23.2	1047	BC	14.5	1047	BC
33.9	1048	BC	14.7	1048	BC	5.3	1048	BC	12.2	1048	BC	2.5	98	DC	7.4	1048	BC	2.8	88	DC	15.8	1048	BC	16.2	1048	BC	26.7	1048	BC	23.3	1048	BC	14.5	1048	BC
33.9	1049	BC	14.8	1049	BC	5.3	1049	BC	12.3	1049	BC	2.6	99	DC	7.4	1049	BC	2.8	89	DC	15.9	1049	BC	16.3	1049	BC	26.7	1049	BC	23.3	1049	BC	14.5	1049	BC
33.9	1050	BC	14.8	1050	BC	5.4	1050	BC	12.4	1050	BC	2.7	100	DC	7.4	1050	BC	2.8	90	DC	15.9	1050	BC	16.4	1050	BC	26.7	1050	BC	23.3	1050	BC	14.5	1050	BC
33.9	1051	BC	14.8	1051	BC	5.4	1051	BC	12.5	1051	BC	2.7	101	DC	7.5	1051	BC	2.9	91	DC	16	1051	BC	16.5	1051	BC	26.8	1051	BC	23.4	1051	BC	14.6	1051	BC
34	1052	BC	14.8	1052	BC	5.4	1052	BC	12.6	1052	BC	2.7	102	DC	7.5	1052	BC	2.9	92	DC	16.1	1052	BC	16.6	1052	BC	26.8	1052	BC	23.4	1052	BC	14.6	1052	BC
34	1053	BC	14.8	1053	BC	5.4	1053	BC	12.7	1053	BC	2.8	103	DC	7.5	1053	BC	3	93	DC	16.1	1053	BC	16.6	1053	BC	26.9	1053	BC	23.4	1053	BC	14.6	1053	BC
34	1054	BC	14.8	1054	BC	5.4	1054	BC	12.8	1054	BC	2.8	104	DC	7.5	1054	BC	3.1	94	DC	16.2	1054	BC	16.7	1054	BC	26.9	1054	BC	23.4	1054	BC	14.7	1054	BC
34.1	1055	BC	14.9	1055	BC	5.4	1055	BC	12.9	1055	BC	2.9	105	DC	7.5	1055	BC	3.1	95	DC	16.2	1055	BC	16.8	1055	BC	26.9	1055	BC	23.4	1055	BC	14.7	1055	BC
34.1	1056	BC	14.9	1056	BC	5.4	1056	BC	13	1056	BC	2.9	106	DC	7.6	1056	BC	3.2	96	DC	16.3	1056	BC	16.9	1056	BC	26.9	1056	BC	23.5	1056	BC	14.8	1056	BC
34.2	1057	BC	14.9	1057	BC	5.4	1057	BC	13.1	1057	BC	3	107	DC	7.6	1057	BC	3.3	97	DC	16.4	1057	BC	17	1057	BC	27	1057	BC	23.5	1057	BC	14.8	1057	BC
34.3	1058	BC	14.9	1058	BC	5.4	1058	BC	13.3	1058	BC	3.1	108	DC	7.6	1058	BC	3.4	98	DC	16.4	1058	BC	17	1058	BC	27	1058	BC	23.5	1058	BC	14.8	1058	BC
34.3	1059	BC	15	1059	BC	5.4	1059	BC	13.4	1059	BC	3.2	109	DC	7.6	1059	BC	3.5	99	DC	16.5	1059	BC	17.1	1059	BC	27	1059	BC	23.6	1059	BC	14.9	1059	BC
34.3	1060	BC	15	1060	BC	5.5	1060	BC	13.6	1060	BC	3.2	110	DC	7.6	1060	BC	3.7	100	DC	16.6	1060	BC	17.2	1060	BC	27.1	1060	BC	23.6	1060	BC	14.9	1060	BC
34.4	1061	BC	15	1061	BC	5.5	1061	BC	13.8	1061	BC	3.2	111	DC	7.7	1061	BC	3.8	101	DC	16.6	1061	BC	17.3	1061	BC	27.1	1061	BC	23.6	1061	BC	14.9	1061	BC
34.4	1062	BC	15	1062	BC	5.5	1062	BC	14	1062	BC	3.3	112	DC	7.7	1062	BC	3.8	102	DC	16.7	1062	BC	17.4	1062	BC	27.2	1062	BC	23.6	1062	BC	15	1062	BC
34.4	1063	BC	15.1	1063	BC	5.5	1063	BC	14.1	1063	BC	3.4	113	DC	7.7	1063	BC	3.9	103	DC	16.7	1063	BC	17.5	1063	BC	27.2	1063	BC	23.6	1063	BC	15	1063	BC
34.4	1064	BC	15.1	1064	BC	5.5	1064	BC	14.3	1064	BC	3.4	114	DC	7.7	1064	BC	4	104	DC	16.8	1064	BC	17.6	1064	BC	27.2	1064	BC	23.7	1064	BC	15.1	1064	BC
34.5	1065	BC	15.1	1065	BC	5.5	1065	BC	14.5	1065	BC	3.4	115	DC	7.7	1065	BC	4.1	105	DC	16.8	1065	BC	17.6	1065	BC	27.3	1065	BC	23.7	1065	BC	15.1	1065	BC
34.5	1066	BC	15.2	1066	BC	5.5	1066	BC	14.6	1066	BC	3.5	116	DC	7.7	1066	BC	4.2	106	DC	16.9	1066	BC	17.7	1066	BC	27.3	1066	BC	24.1	1066	BC	15.1	1066	BC
34.6	1067	BC	15.2	1067	BC	5.5	1067	BC	14.8	1067	BC	3.6	117	DC	7.8	1067	BC	4.2	107	DC	16.9	1067	BC	17.8	1067	BC	27.3	1067	BC	24.4	1067	BC	15.2	1067	BC
34.6	1068	BC	15.2	1068	BC	5.5	1068	BC	15	1068	BC	3.6	118	DC	7.8	1068	BC	4.4	108	DC	17	1068	BC	17.8	1068	BC	27.3	1068	BC	24.5	1068	BC	15.2	1068	BC
34.6	1069	BC	15.2	1069	BC	5.5	1069	BC	15.2	1069	BC	3.7	119	DC	7.8	1069	BC	4.5	109	DC	17	1069	BC	17.9	1069	BC	27.4	1069	BC	24.5	1069	BC	15.2	1069	BC
34.7	1070	BC	15.2	1070	BC	5.5	1070	BC	15.4	1070	BC	3.7	120	DC	7.9	1070	BC	4.6	110	DC	17.1	1070	BC	18	1070	BC	27.5	1070	BC	24.5	1070	BC	15.3	1070	BC
35.1	1071	BC	15.2	1071	BC	5.5	1071	BC	15.7	1071	BC	3.7	121	DC	7.9	1071	BC	4.7	111	DC	17.1	1071	BC	18.1	1071	BC	27.5	1071	BC	24.6	1071	BC	15.3	1071	BC
35.2	1072	BC	15.2	1072	BC	5.5	1072	BC	16	1072	BC	3.8	122	DC	7.9	1072	BC	4.9	112	DC	17.2	1072	BC	18.2	1072	BC	27.6	1072	BC	24.6	1072	BC	15.4	1072	BC
35.2	1073	BC	15.3	1073	BC	5.5	1073	BC	16.2	1073	BC	3.9	123	DC	7.9	1073	BC	5	113	DC	17.2	1073	BC	18.2	1073	BC	27.6	1073	BC	24.6	1073	BC	15.4	1073	BC
35.3	1074	BC	15.3	1074	BC	5.5	1074	BC	16.5	1074	BC	3.9	124	DC	7.9	1074	BC	5.2	114	DC	17.3	1074	BC	18.3	1074	BC	27.6	1074	BC	24.7	1074	BC	15.4	1074	BC
35.3	1075	BC	15.3	1075	BC	5.6	1075	BC	16.8	1075	BC	4	125	DC	7.9	1075	BC	5.3	115	DC	17.3	1075	BC	18.4	1075	BC	27.7	1075	BC	24.7	1075	BC	15.4	1075	BC
35.3	1076	BC	15.3	1076	BC	5.6	1076	BC	17.1	1076	BC	4.1	126	DC	8	1076	BC	5.5	116	DC	17.4	1076	BC	18.4	1076	BC	27.7	1076	BC	24.7	1076	BC	15.5	1076	BC
35.3	1077	BC	15.3	1077	BC	5.6	1077	BC	17.4	1077	BC	4.1	127	DC	8	1077	BC	5.5	117	DC	17.5	1077	BC	18.5	1077	BC	27.7	1077	BC	24.7	1077	BC	15.5	1077	BC
35.4	1078	BC	15.3	1078	BC	5.6	1078	BC	17.8	1078	BC	4.2	128	DC	8	1078	BC	5.7	118	DC	17.5	1078	BC	18.6	1078	BC	27.8	1078	BC	24.8	1078	BC	15.5	1078	BC
35.4	1079	BC	15.4	1079	BC	5.6	1079	BC	18.2	1079	BC	4.3	129	DC	8	1079	BC	5.9	119	DC	17.5	1079	BC	18.7	1079	BC	27.8	1079	BC	24.8	1079	BC	15.5	1079	BC
35.4	1080	BC	15.4	1080	BC	5.6	1080	BC	18.6	1080	BC	4.4	130	DC	8.1	1080	BC	6	120	DC	17.6	1080	BC	18.8	1080	BC	27.8	1080	BC	24.8	1080	BC	15.6	1080	BC
35.5	1081	BC	15.4	1081	BC	5.6	1081	BC	19.1	1081	BC	4.5	131	DC	8.1	1081	BC	6.2	121	DC	17.6	1081	BC	18.8	1081	BC	27.9	1081	BC	24.8	1081	BC	15.6	1081	BC
35.5	1082	BC	15.4	1082	BC	5.6	1082	BC	19.5	1082	BC	4.6	132	DC	8.1	1082	BC	6.4	122	DC	17.7	1082	BC	18.9	1082	BC	27.9	1082	BC	24.9	1082	BC	15.7	1082	BC
35.5	1083	BC	15.4	1083	BC	5.6	1083	BC	20	1083	BC	4.6	133	DC	8.1	1083	BC	6.7	123	DC	17.8	1083	BC	19	1083	BC	27.9	1083	BC	24.9	1083	BC	15.7	1083	BC
35.6	1084	BC	15.4	1084	BC	5.6	1084	BC	20.6	1084	BC	4.7	134	DC	8.1	1084	BC	7	124	DC	17.8	1084	BC	19.1	1084	BC	27.9	1084	BC	24.9	1084	BC	15.7	1084	BC
35.6	1085	BC	15.5	1085	BC	5.6	1085	BC	21.4	1085	BC	4.8	135	DC	8.1	1085	BC	7.2	125	DC	17.9	1085	BC	19.2	1085	BC	27.9	1085	BC	24.9	1085	BC	15.7	1085	BC
35.6	1086	BC	15.5	1086	BC	5.6	1086	BC	22.2	1086	BC	4.9	136	DC	8.2	1086	BC	7.5	126	DC	17.9	1086	BC	19.2	1086	BC	28	1086	BC	25	1086	BC	15.8	1086	BC
35.7	1087	BC	15.5	1087	BC	5.7	1087	BC	23.2	1087	BC	4.9	137	DC	8.2	1087	BC	7.8	127	DC	18	1087	BC	19.3	1087	BC	28.1	1087	BC	25	1087	BC	15.8	1087	BC
35.7	1088	BC	15.5	1088	BC	5.7	1088	BC	24.4	1088	BC	5	138	DC	8.2	1088	BC	8.3	128	DC	18.1	1088	BC	19.4	1088	BC	28.1	1088	BC	25	1088	BC	15.8	1088	BC
35.7	1089	BC	15.5	1089	BC	5.7	1089	BC	26.2	1089	BC	5.1	139	DC	8.2	1089	BC	8.7	129	DC	18.1	1089	BC	19.5	1089	BC	28.2	1089	BC	25.1	1089	BC	15.8	1089	BC
35.8	1090	BC	15.5	1090	BC	5.7	1090	BC	29.3	1090	BC	5.2	140	DC	8.2	1090	BC	9	130	DC	18.2	1090	BC	19.6	1090	BC	28.2	1090	BC	25.1	1090	BC	15.9	1090	BC
35.8	1091	BC	15.6	1091	BC	5.7	1091	BC	100	1091	BC	5.3	141	DC	8.2	1091	BC	9.4	131	DC	18.3	1091	BC	19.7	1091	BC	28.2	1091	BC	25.1	1091	BC	15.9	1091	BC
35.8	1092	BC	15.6	1092	BC	5.7	1092	BC	0	1	DC	5.4	142	DC	8.3	1092	BC	9.8	132	DC	18.3	1092	BC	19.7	1092	BC	28.2	1092	BC	25.1	1092	BC	15.9	1092	BC
35.8	1093	BC	15.6	1093	BC	5.7	1093	BC	0	2	DC	5.4	143	DC	8.3	1093	BC	10.2	133	DC	18.4	1093	BC	19.8	1093	BC	28.3	1093	BC	25.2	1093	BC	15.9	1093	BC
35.9	1094	BC	15.6	1094	BC	5.7	1094	BC	0	3	DC	5.5	144	DC	8.3	1094	BC	10.7	134	DC	18.5	1094	BC	19.9	1094	BC	28.3	1094	BC	25.2	1094	BC	16	1094	BC
35.9	1095	BC	15.6	1095	BC	5.8	1095	BC	0	4	DC	5.5	145	DC	8.3	1095	BC	11.2	135	DC	18.5	1095	BC	19.9	1095	BC	28.5	1095	BC	25.2	1095	BC	16	1095	BC
35.9	1096	BC	15.6	1096	BC	5.8	1096	BC	0	5	DC	5.6	146	DC	8.3	1096	BC	11.8	136	DC	18.6	1096	BC	20	1096	BC	28.5	1096	BC	25.2	1096	BC	16.1	1096	BC
36	1097	BC	15.7	1097	BC	5.8	1097	BC	0	6	DC	5.6	147	DC	8.3	1097	BC	12.4	137	DC	18.7	1097	BC	20.1	1097	BC	28.6	1097	BC	25.2	1097	BC	16.1	1097	BC
36	1098	BC	15.7	1098	BC	5.8	1098	BC	0	7	DC	5.8	148	DC	8.4	1098	BC	13	138	DC	18.7	1098	BC	20.1	1098	BC	28.6	1098	BC	25.3	1098	BC	16.2	1098	BC
36	1099	BC	15.7	1099	BC	5.8	1099	BC	0	8	DC	5.9	149	DC	8.4	1099	BC	13.9	139	DC	18.8	1099	BC	20.2	1099	BC	28.7	1099	BC	25.3	1099	BC	16.2	1099	BC
36.1	1100	BC	15.7	1100	BC	5.9	1100	BC	0	9	DC	6.1	150	DC	8.4	1100	BC	14.7	140	DC	18.9	1100	BC	20.3	1100	BC	28.7	1100	BC	25.3	1100	BC	16.2	1100	BC
36.1	1101	BC	15.7	1101	BC	5.9	1101	BC	0	10	DC	6.2	151	DC	8.4	1101	BC	15.6	141	DC	18.9	1101	BC	20.4	1101	BC	28.7	1101	BC	25.3	1101	BC	16.3	1101	BC
36.1	1102	BC	15.8	1102	BC	5.9	1102	BC	0	11	DC	6.4	152	DC	8.4	1102	BC	16.6	142	DC	19	1102	BC	20.4	1102	BC	28.8	1102	BC	25.4	1102	BC	16.3	1102	BC
36.2	1103	BC	15.8	1103	BC	5.9	1103	BC	0	12	DC	6.5	153	DC	8.5	1103	BC	17.6	143	DC	19.1	1103	BC	20.5	1103	BC	28.8	1103	BC	25.4	1103	BC	16.3	1103	BC
36.2	1104	BC	15.8	1104	BC	5.9	1104	BC	0	13	DC	6.6	154	DC	8.5	1104	BC	18.8	144	DC	19.1	1104	BC	20.5	1104	BC	28.9	1104	BC	25.4	1104	BC	16.4	1104	BC
36.2	1105	BC	15.8	1105	BC	5.9	1105	BC	0	14	DC	6.7	155	DC	8.5	1105	BC	20.3	145	DC	19.2	1105	BC	20.6	1105	BC	28.9	1105	BC	25.4	1105	BC	16.5	1105	BC
36.3	1106	BC	15.8	1106	BC	5.9	1106	BC	0	15	DC	6.7	156	DC	8.5	1106	BC	21.3	146	DC	19.3	1106	BC	20.7	1106	BC	29	1106	BC	25.4	1106	BC	16.5	1106	BC
36.3	1107	BC	15.8	1107	BC	5.9	1107	BC	0	16	DC	7	157	DC	8.5	1107	BC	22.8	147	DC	19.3	1107	BC	20.7	1107	BC	29	1107	BC	25.5	1107	BC	16.5	1107	BC
36.3	1108	BC	15.8	1108	BC	6	1108	BC	0.1	17	DC	7	158	DC	8.6	1108	BC	24.2	148	DC	19.4	1108	BC	20.8	1108	BC	29	1108	BC	25.5	1108	BC	16.5	1108	BC
36.4	1109	BC	15.9	1109	BC	6	1109	BC	0.1	18	DC	7.2	159	DC	8.6	1109	BC	25.8	149	DC	19.5	1109	BC	20.9	1109	BC	29.1	1109	BC	25.5	1109	BC	16.6	1109	BC
36.5	1110	BC	15.9	1110	BC	6	1110	BC	0.1	19	DC	7.3	160	DC	8.6	1110	BC	27.7	150	DC	19.5	1110	BC	20.9	1110	BC	29.1	1110	BC	25.6	1110	BC	16.6	1110	BC
36.5	1111	BC	15.9	1111	BC	6	1111	BC	0.1	20	DC	7.4	161	DC	8.6	1111	BC	29.6	151	DC	19.6	1111	BC	21	1111	BC	29.2	1111	BC	25.6	1111	BC	16.7	1111	BC
36.6	1112	BC	15.9	1112	BC	6	1112	BC	0.1	21	DC	7.6	162	DC	8.6	1112	BC	31.9	152	DC	19.7	1112	BC	21.1	1112	BC	29.2	1112	BC	25.6	1112	BC	16.8	1112	BC
36.6	1113	BC	15.9	1113	BC	6	1113	BC	0.1	22	DC	7.8	163	DC	8.7	1113	BC	35.1	153	DC	19.8	1113	BC	21.1	1113	BC	29.3	1113	BC	25.6	1113	BC	16.8	1113	BC
36.7	1114	BC	15.9	1114	BC	6	1114	BC	0.1	23	DC	8.2	164	DC	8.7	1114	BC	38	154	DC	19.9	1114	BC	21.2	1114	BC	29.4	1114	BC	25.6	1114	BC	16.9	1114	BC
36.8	1115	BC	16	1115	BC	6	1115	BC	0.1	24	DC	8.4	165	DC	8.7	1115	BC	40.8	155	DC	19.9	1115	BC	21.3	1115	BC	29.4	1115	BC	25.7	1115	BC	17	1115	BC
36.8	1116	BC	16	1116	BC	6.1	1116	BC	0.1	25	DC	8.5	166	DC	8.7	1116	BC	44.1	156	DC	20	1116	BC	21.3	1116	BC	29.4	1116	BC	25.7	1116	BC	17	1116	BC
36.9	1117	BC	16	1117	BC	6.1	1117	BC	0.1	26	DC	8.9	167	DC	8.7	1117	BC	47.8	157	DC	20.1	1117	BC	21.4	1117	BC	29.5	1117	BC	25.7	1117	BC	17.1	1117	BC
36.9	1118	BC	16	1118	BC	6.1	1118	BC	0.1	27	DC	9.1	168	DC	8.7	1118	BC	52.7	158	DC	20.1	1118	BC	21.4	1118	BC	29.5	1118	BC	25.8	1118	BC	17.1	1118	BC
37	1119	BC	16	1119	BC	6.1	1119	BC	0.1	28	DC	9.3	169	DC	8.8	1119	BC	57.3	159	DC	20.2	1119	BC	21.5	1119	BC	29.6	1119	BC	25.8	1119	BC	17.2	1119	BC
37	1120	BC	16.1	1120	BC	6.1	1120	BC	0.1	29	DC	9.4	170	DC	8.8	1120	BC	61.9	160	DC	20.3	1120	BC	21.6	1120	BC	29.7	1120	BC	25.8	1120	BC	17.8	1120	BC
37	1121	BC	16.4	1121	BC	6.1	1121	BC	0.1	30	DC	9.6	171	DC	8.8	1121	BC	68.3	161	DC	20.3	1121	BC	21.7	1121	BC	29.7	1121	BC	25.8	1121	BC	17.8	1121	BC
37.1	1122	BC	16.4	1122	BC	6.1	1122	BC	0.1	31	DC	9.7	172	DC	8.8	1122	BC	74.3	162	DC	20.4	1122	BC	21.7	1122	BC	29.8	1122	BC	25.8	1122	BC	17.9	1122	BC
37.1	1123	BC	16.4	1123	BC	6.2	1123	BC	0.1	32	DC	10	173	DC	8.8	1123	BC	81.9	163	DC	20.4	1123	BC	21.8	1123	BC	29.8	1123	BC	25.9	1123	BC	17.9	1123	BC
37.1	1124	BC	16.4	1124	BC	6.2	1124	BC	0.1	33	DC	10.4	174	DC	8.9	1124	BC	89.8	164	DC	20.5	1124	BC	21.8	1124	BC	29.8	1124	BC	25.9	1124	BC	18	1124	BC
37.1	1125	BC	16.4	1125	BC	6.2	1125	BC	0.1	34	DC	10.6	175	DC	8.9	1125	BC	100	165	DC	20.5	1125	BC	21.9	1125	BC	29.9	1125	BC	25.9	1125	BC	18	1125	BC
37.2	1126	BC	16.4	1126	BC	6.2	1126	BC	0.1	35	DC	10.9	176	DC	8.9	1126	BC	2.9	1	KS	20.6	1126	BC	22	1126	BC	30	1126	BC	26	1126	BC	18.1	1126	BC
37.2	1127	BC	16.5	1127	BC	6.2	1127	BC	0.1	36	DC	11.2	177	DC	8.9	1127	BC	6.6	2	KS	20.6	1127	BC	22	1127	BC	30	1127	BC	26	1127	BC	18.1	1127	BC
37.3	1128	BC	16.5	1128	BC	6.2	1128	BC	0.1	37	DC	11.6	178	DC	8.9	1128	BC	8.5	3	KS	20.7	1128	BC	22.1	1128	BC	30	1128	BC	26.1	1128	BC	18.1	1128	BC
37.3	1129	BC	16.5	1129	BC	6.2	1129	BC	0.1	38	DC	11.9	179	DC	9	1129	BC	9.4	4	KS	20.7	1129	BC	22.2	1129	BC	30.1	1129	BC	26.1	1129	BC	18.2	1129	BC
37.4	1130	BC	16.5	1130	BC	6.2	1130	BC	0.1	39	DC	12.2	180	DC	9	1130	BC	11.9	5	KS	20.8	1130	BC	22.2	1130	BC	30.1	1130	BC	26.1	1130	BC	18.2	1130	BC
37.4	1131	BC	16.5	1131	BC	6.3	1131	BC	0.1	40	DC	12.5	181	DC	9	1131	BC	13.5	6	KS	20.9	1131	BC	22.3	1131	BC	30.1	1131	BC	26.1	1131	BC	18.2	1131	BC
37.4	1132	BC	16.6	1132	BC	6.3	1132	BC	0.1	41	DC	12.8	182	DC	9.1	1132	BC	16.2	7	KS	20.9	1132	BC	22.4	1132	BC	30.2	1132	BC	26.1	1132	BC	18.3	1132	BC
37.5	1133	BC	16.6	1133	BC	6.3	1133	BC	0.1	42	DC	13.2	183	DC	9.1	1133	BC	18.2	8	KS	21	1133	BC	22.5	1133	BC	30.2	1133	BC	26.2	1133	BC	18.3	1133	BC
37.5	1134	BC	16.6	1134	BC	6.3	1134	BC	0.1	43	DC	13.7	184	DC	9.1	1134	BC	20	9	KS	21	1134	BC	22.5	1134	BC	30.3	1134	BC	26.2	1134	BC	18.3	1134	BC
37.6	1135	BC	16.6	1135	BC	6.3	1135	BC	0.1	44	DC	14.3	185	DC	9.1	1135	BC	23.2	10	KS	21.1	1135	BC	22.6	1135	BC	30.4	1135	BC	26.2	1135	BC	18.4	1135	BC
37.6	1136	BC	16.6	1136	BC	6.3	1136	BC	0.1	45	DC	14.6	186	DC	9.1	1136	BC	26.8	11	KS	21.2	1136	BC	22.7	1136	BC	30.4	1136	BC	26.2	1136	BC	18.4	1136	BC
37.6	1137	BC	16.7	1137	BC	6.3	1137	BC	0.1	46	DC	15	187	DC	9.2	1137	BC	30.1	12	KS	21.2	1137	BC	22.8	1137	BC	30.5	1137	BC	26.2	1137	BC	18.4	1137	BC
37.6	1138	BC	16.7	1138	BC	6.3	1138	BC	0.1	47	DC	15.6	188	DC	9.2	1138	BC	33.7	13	KS	21.3	1138	BC	22.8	1138	BC	30.5	1138	BC	26.3	1138	BC	18.5	1138	BC
37.7	1139	BC	16.7	1139	BC	6.3	1139	BC	0.1	48	DC	16	189	DC	9.2	1139	BC	38.9	14	KS	21.3	1139	BC	22.9	1139	BC	30.5	1139	BC	26.3	1139	BC	18.5	1139	BC
37.7	1140	BC	16.7	1140	BC	6.4	1140	BC	0.1	49	DC	16.5	190	DC	9.2	1140	BC	43.9	15	KS	21.4	1140	BC	22.9	1140	BC	30.6	1140	BC	26.3	1140	BC	18.6	1140	BC
37.8	1141	BC	16.7	1141	BC	6.4	1141	BC	0.2	50	DC	17	191	DC	9.2	1141	BC	48.3	16	KS	21.5	1141	BC	23	1141	BC	30.6	1141	BC	26.4	1141	BC	18.6	1141	BC
37.9	1142	BC	16.7	1142	BC	6.4	1142	BC	0.2	51	DC	17.6	192	DC	9.2	1142	BC	53.8	17	KS	21.5	1142	BC	23	1142	BC	30.7	1142	BC	26.4	1142	BC	18.6	1142	BC
37.9	1143	BC	16.8	1143	BC	6.4	1143	BC	0.2	52	DC	18.1	193	DC	9.3	1143	BC	59.3	18	KS	21.6	1143	BC	23.1	1143	BC	30.8	1143	BC	26.4	1143	BC	18.7	1143	BC
38	1144	BC	16.8	1144	BC	6.4	1144	BC	0.2	53	DC	18.6	194	DC	9.3	1144	BC	66	19	KS	21.6	1144	BC	23.2	1144	BC	30.9	1144	BC	26.5	1144	BC	18.7	1144	BC
38	1145	BC	16.8	1145	BC	6.4	1145	BC	0.2	54	DC	19.4	195	DC	9.3	1145	BC	73	20	KS	21.7	1145	BC	23.2	1145	BC	30.9	1145	BC	26.5	1145	BC	18.8	1145	BC
38	1146	BC	16.8	1146	BC	6.4	1146	BC	0.2	55	DC	20.2	196	DC	9.3	1146	BC	81.1	21	KS	21.7	1146	BC	23.3	1146	BC	31	1146	BC	26.5	1146	BC	18.9	1146	BC
38.1	1147	BC	16.8	1147	BC	6.4	1147	BC	0.2	56	DC	21	197	DC	9.4	1147	BC	89.5	22	KS	21.8	1147	BC	23.3	1147	BC	31	1147	BC	26.5	1147	BC	18.9	1147	BC
38.1	1148	BC	16.8	1148	BC	6.4	1148	BC	0.2	57	DC	21.6	198	DC	9.4	1148	BC	100	23	KS	21.9	1148	BC	23.4	1148	BC	31.1	1148	BC	26.5	1148	BC	18.9	1148	BC
38.1	1149	BC	16.9	1149	BC	6.5	1149	BC	0.2	58	DC	22.5	199	DC	9.4	1149	BC	0	1	PR	21.9	1149	BC	23.4	1149	BC	31.1	1149	BC	26.6	1149	BC	19	1149	BC
38.2	1150	BC	16.9	1150	BC	6.5	1150	BC	0.2	59	DC	23.4	200	DC	9.4	1150	BC	0	2	PR	22	1150	BC	23.5	1150	BC	31.1	1150	BC	26.6	1150	BC	19	1150	BC
38.3	1151	BC	16.9	1151	BC	6.5	1151	BC	0.2	60	DC	24.3	201	DC	9.5	1151	BC	0.1	3	PR	22.1	1151	BC	23.5	1151	BC	31.1	1151	BC	26.6	1151	BC	19.1	1151	BC
38.4	1152	BC	16.9	1152	BC	6.5	1152	BC	0.2	61	DC	25.2	202	DC	9.5	1152	BC	0.1	4	PR	22.1	1152	BC	23.6	1152	BC	31.2	1152	BC	26.6	1152	BC	19.2	1152	BC
38.4	1153	BC	16.9	1153	BC	6.5	1153	BC	0.2	62	DC	26.2	203	DC	9.5	1153	BC	0.1	5	PR	22.1	1153	BC	23.6	1153	BC	31.3	1153	BC	26.7	1153	BC	19.2	1153	BC
38.5	1154	BC	17	1154	BC	6.5	1154	BC	0.2	63	DC	27.1	204	DC	9.6	1154	BC	0.1	6	PR	22.2	1154	BC	23.7	1154	BC	31.4	1154	BC	26.7	1154	BC	19.3	1154	BC
38.5	1155	BC	17	1155	BC	6.5	1155	BC	0.2	64	DC	28.2	205	DC	9.6	1155	BC	0.2	7	PR	22.3	1155	BC	23.7	1155	BC	31.5	1155	BC	26.7	1155	BC	19.3	1155	BC
38.6	1156	BC	17	1156	BC	6.5	1156	BC	0.2	65	DC	29.2	206	DC	9.7	1156	BC	0.2	8	PR	22.3	1156	BC	23.7	1156	BC	31.6	1156	BC	26.7	1156	BC	19.3	1156	BC
38.6	1157	BC	17	1157	BC	6.6	1157	BC	0.2	66	DC	30.4	207	DC	9.7	1157	BC	0.2	9	PR	22.4	1157	BC	23.8	1157	BC	31.7	1157	BC	26.7	1157	BC	19.4	1157	BC
38.6	1158	BC	17	1158	BC	6.6	1158	BC	0.2	67	DC	31.8	208	DC	9.7	1158	BC	0.2	10	PR	22.4	1158	BC	23.8	1158	BC	31.8	1158	BC	26.8	1158	BC	19.4	1158	BC
38.6	1159	BC	17.1	1159	BC	6.6	1159	BC	0.2	68	DC	33.5	209	DC	9.8	1159	BC	0.3	11	PR	22.5	1159	BC	23.9	1159	BC	31.9	1159	BC	26.8	1159	BC	19.4	1159	BC
38.6	1160	BC	17.1	1160	BC	6.6	1160	BC	0.2	69	DC	35.5	210	DC	9.8	1160	BC	0.3	12	PR	22.5	1160	BC	23.9	1160	BC	32	1160	BC	26.8	1160	BC	19.5	1160	BC
38.7	1161	BC	17.1	1161	BC	6.6	1161	BC	0.2	70	DC	37.2	211	DC	9.8	1161	BC	0.3	13	PR	22.6	1161	BC	24	1161	BC	32	1161	BC	26.8	1161	BC	19.5	1161	BC
38.7	1162	BC	17.1	1162	BC	6.6	1162	BC	0.2	71	DC	39.1	212	DC	9.8	1162	BC	0.3	14	PR	22.6	1162	BC	24	1162	BC	32	1162	BC	26.9	1162	BC	19.5	1162	BC
38.7	1163	BC	17.1	1163	BC	6.6	1163	BC	0.2	72	DC	40.8	213	DC	9.9	1163	BC	0.3	15	PR	22.7	1163	BC	24.1	1163	BC	32.1	1163	BC	26.9	1163	BC	19.6	1163	BC
38.7	1164	BC	17.1	1164	BC	6.7	1164	BC	0.2	73	DC	43.2	214	DC	9.9	1164	BC	0.4	16	PR	22.7	1164	BC	24.1	1164	BC	32.1	1164	BC	26.9	1164	BC	19.6	1164	BC
38.8	1165	BC	17.2	1165	BC	6.7	1165	BC	0.2	74	DC	45.3	215	DC	9.9	1165	BC	0.4	17	PR	22.8	1165	BC	24.2	1165	BC	32.2	1165	BC	26.9	1165	BC	19.7	1165	BC
38.8	1166	BC	17.2	1166	BC	6.7	1166	BC	0.3	75	DC	48.2	216	DC	9.9	1166	BC	0.4	18	PR	22.8	1166	BC	24.2	1166	BC	32.2	1166	BC	27	1166	BC	19.7	1166	BC
38.9	1167	BC	17.2	1167	BC	6.7	1167	BC	0.3	76	DC	50.9	217	DC	10	1167	BC	0.4	19	PR	22.9	1167	BC	24.3	1167	BC	32.3	1167	BC	27	1167	BC	19.8	1167	BC
39	1168	BC	17.2	1168	BC	6.7	1168	BC	0.3	77	DC	53.6	218	DC	10	1168	BC	0.5	20	PR	22.9	1168	BC	24.3	1168	BC	32.4	1168	BC	27	1168	BC	19.8	1168	BC
39.1	1169	BC	17.2	1169	BC	6.7	1169	BC	0.3	78	DC	56.8	219	DC	10	1169	BC	0.5	21	PR	23	1169	BC	24.4	1169	BC	32.5	1169	BC	27	1169	BC	19.8	1169	BC
39.2	1170	BC	17.2	1170	BC	6.7	1170	BC	0.3	79	DC	61	220	DC	10	1170	BC	0.5	22	PR	23	1170	BC	24.4	1170	BC	32.5	1170	BC	27	1170	BC	19.9	1170	BC
39.2	1171	BC	17.2	1171	BC	6.8	1171	BC	0.3	80	DC	65.1	221	DC	10.1	1171	BC	0.5	23	PR	23.1	1171	BC	24.4	1171	BC	32.6	1171	BC	27.1	1171	BC	19.9	1171	BC
39.2	1172	BC	17.3	1172	BC	6.8	1172	BC	0.3	81	DC	68.8	222	DC	10.1	1172	BC	0.5	24	PR	23.1	1172	BC	24.5	1172	BC	32.6	1172	BC	27.1	1172	BC	20	1172	BC
39.3	1173	BC	17.3	1173	BC	6.8	1173	BC	0.3	82	DC	73.4	223	DC	10.1	1173	BC	0.6	25	PR	23.2	1173	BC	24.5	1173	BC	32.7	1173	BC	27.1	1173	BC	20.1	1173	BC
39.3	1174	BC	17.3	1174	BC	6.8	1174	BC	0.3	83	DC	77.6	224	DC	10.1	1174	BC	0.6	26	PR	23.2	1174	BC	24.5	1174	BC	32.8	1174	BC	27.1	1174	BC	20.1	1174	BC
39.4	1175	BC	17.3	1175	BC	6.8	1175	BC	0.3	84	DC	82.4	225	DC	10.1	1175	BC	0.6	27	PR	23.3	1175	BC	24.6	1175	BC	32.8	1175	BC	27.1	1175	BC	20.1	1175	BC
39.4	1176	BC	17.4	1176	BC	6.8	1176	BC	0.3	85	DC	87.5	226	DC	10.2	1176	BC	0.6	28	PR	23.3	1176	BC	24.6	1176	BC	32.9	1176	BC	27.2	1176	BC	20.2	1176	BC
39.5	1177	BC	17.4	1177	BC	6.8	1177	BC	0.3	86	DC	93.7	227	DC	10.2	1177	BC	0.7	29	PR	23.4	1177	BC	24.6	1177	BC	33	1177	BC	27.2	1177	BC	20.2	1177	BC
39.5	1178	BC	17.4	1178	BC	6.9	1178	BC	0.3	87	DC	100	228	DC	10.2	1178	BC	0.7	30	PR	23.4	1178	BC	24.6	1178	BC	33.1	1178	BC	27.2	1178	BC	20.2	1178	BC
39.6	1179	BC	17.4	1179	BC	6.9	1179	BC	0.3	88	DC	7.9	1	KS	10.2	1179	BC	0.7	31	PR	23.4	1179	BC	24.7	1179	BC	33.1	1179	BC	27.2	1179	BC	20.3	1179	BC
39.7	1180	BC	17.5	1180	BC	6.9	1180	BC	0.3	89	DC	8.3	2	KS	10.3	1180	BC	0.7	32	PR	23.5	1180	BC	24.7	1180	BC	33.2	1180	BC	27.2	1180	BC	20.4	1180	BC
39.7	1181	BC	17.5	1181	BC	6.9	1181	BC	0.3	90	DC	10.6	3	KS	10.3	1181	BC	0.8	33	PR	23.5	1181	BC	24.8	1181	BC	33.3	1181	BC	27.3	1181	BC	20.4	1181	BC
39.8	1182	BC	17.5	1182	BC	6.9	1182	BC	0.3	91	DC	11.9	4	KS	10.3	1182	BC	0.8	34	PR	23.6	1182	BC	24.8	1182	BC	33.3	1182	BC	27.3	1182	BC	20.4	1182	BC
39.8	1183	BC	17.5	1183	BC	6.9	1183	BC	0.3	92	DC	12.3	5	KS	10.3	1183	BC	0.8	35	PR	23.6	1183	BC	24.8	1183	BC	33.3	1183	BC	27.3	1183	BC	20.5	1183	BC
39.8	1184	BC	17.6	1184	BC	6.9	1184	BC	0.3	93	DC	13.8	6	KS	10.4	1184	BC	0.8	36	PR	23.6	1184	BC	24.8	1184	BC	33.4	1184	BC	27.4	1184	BC	20.5	1184	BC
39.8	1185	BC	17.6	1185	BC	6.9	1185	BC	0.3	94	DC	15.4	7	KS	10.4	1185	BC	0.8	37	PR	23.7	1185	BC	24.9	1185	BC	33.4	1185	BC	27.4	1185	BC	20.6	1185	BC
39.9	1186	BC	17.6	1186	BC	7	1186	BC	0.3	95	DC	16.8	8	KS	10.4	1186	BC	0.9	38	PR	23.7	1186	BC	24.9	1186	BC	33.5	1186	BC	27.4	1186	BC	20.6	1186	BC
39.9	1187	BC	17.6	1187	BC	7	1187	BC	0.3	96	DC	19	9	KS	10.4	1187	BC	0.9	39	PR	23.8	1187	BC	24.9	1187	BC	33.5	1187	BC	27.4	1187	BC	20.7	1187	BC
39.9	1188	BC	17.6	1188	BC	7	1188	BC	0.3	97	DC	19.8	10	KS	10.5	1188	BC	0.9	40	PR	23.8	1188	BC	25	1188	BC	33.6	1188	BC	27.5	1188	BC	20.7	1188	BC
40	1189	BC	17.6	1189	BC	7	1189	BC	0.3	98	DC	21.3	11	KS	10.5	1189	BC	0.9	41	PR	23.8	1189	BC	25	1189	BC	33.6	1189	BC	27.5	1189	BC	20.8	1189	BC
40	1190	BC	17.7	1190	BC	7	1190	BC	0.3	99	DC	23.3	12	KS	10.5	1190	BC	1	42	PR	23.9	1190	BC	25	1190	BC	33.7	1190	BC	27.6	1190	BC	20.8	1190	BC
40.1	1191	BC	17.7	1191	BC	7	1191	BC	0.3	100	DC	25	13	KS	10.5	1191	BC	1	43	PR	23.9	1191	BC	25.1	1191	BC	33.7	1191	BC	27.6	1191	BC	20.9	1191	BC
40.1	1192	BC	17.7	1192	BC	7.1	1192	BC	0.3	101	DC	26.6	14	KS	10.6	1192	BC	1	44	PR	24	1192	BC	25.1	1192	BC	33.8	1192	BC	27.6	1192	BC	21	1192	BC
40.3	1193	BC	17.7	1193	BC	7.1	1193	BC	0.3	102	DC	28.2	15	KS	10.6	1193	BC	1	45	PR	24	1193	BC	25.1	1193	BC	33.8	1193	BC	27.7	1193	BC	21	1193	BC
40.4	1194	BC	17.8	1194	BC	7.1	1194	BC	0.4	103	DC	30.3	16	KS	10.6	1194	BC	1	46	PR	24.1	1194	BC	25.1	1194	BC	33.9	1194	BC	27.7	1194	BC	21.1	1194	BC
40.4	1195	BC	17.8	1195	BC	7.1	1195	BC	0.4	104	DC	32.7	17	KS	10.7	1195	BC	1.1	47	PR	24.1	1195	BC	25.2	1195	BC	33.9	1195	BC	27.7	1195	BC	21.1	1195	BC
40.5	1196	BC	17.8	1196	BC	7.1	1196	BC	0.4	105	DC	34.8	18	KS	10.7	1196	BC	1.1	48	PR	24.1	1196	BC	25.2	1196	BC	34	1196	BC	27.7	1196	BC	21.2	1196	BC
40.5	1197	BC	17.9	1197	BC	7.1	1197	BC	0.4	106	DC	37.8	19	KS	10.8	1197	BC	1.1	49	PR	24.2	1197	BC	25.2	1197	BC	34.2	1197	BC	27.7	1197	BC	21.2	1197	BC
41	1198	BC	17.9	1198	BC	7.1	1198	BC	0.4	107	DC	40.1	20	KS	10.8	1198	BC	1.1	50	PR	24.2	1198	BC	25.3	1198	BC	34.2	1198	BC	27.8	1198	BC	21.3	1198	BC
41	1199	BC	17.9	1199	BC	7.1	1199	BC	0.4	108	DC	43.5	21	KS	10.8	1199	BC	1.2	51	PR	24.2	1199	BC	25.3	1199	BC	34.3	1199	BC	27.8	1199	BC	21.4	1199	BC
41.1	1200	BC	17.9	1200	BC	7.2	1200	BC	0.4	109	DC	46.6	22	KS	10.9	1200	BC	1.2	52	PR	24.2	1200	BC	25.3	1200	BC	34.3	1200	BC	27.8	1200	BC	21.4	1200	BC
41.2	1201	BC	17.9	1201	BC	7.2	1201	BC	0.4	110	DC	50.2	23	KS	10.9	1201	BC	1.2	53	PR	24.3	1201	BC	25.4	1201	BC	34.4	1201	BC	27.8	1201	BC	21.4	1201	BC
41.2	1202	BC	17.9	1202	BC	7.2	1202	BC	0.4	111	DC	53.7	24	KS	10.9	1202	BC	1.2	54	PR	24.3	1202	BC	25.4	1202	BC	34.4	1202	BC	27.9	1202	BC	21.5	1202	BC
41.4	1203	BC	18	1203	BC	7.2	1203	BC	0.4	112	DC	57.8	25	KS	11	1203	BC	1.3	55	PR	24.3	1203	BC	25.4	1203	BC	34.5	1203	BC	27.9	1203	BC	21.5	1203	BC
41.5	1204	BC	18	1204	BC	7.2	1204	BC	0.4	113	DC	62.7	26	KS	11	1204	BC	1.3	56	PR	24.4	1204	BC	25.4	1204	BC	34.6	1204	BC	27.9	1204	BC	21.6	1204	BC
41.5	1205	BC	18	1205	BC	7.2	1205	BC	0.4	114	DC	67	27	KS	11	1205	BC	1.3	57	PR	24.4	1205	BC	25.4	1205	BC	34.7	1205	BC	27.9	1205	BC	21.7	1205	BC
41.6	1206	BC	18	1206	BC	7.3	1206	BC	0.4	115	DC	71.9	28	KS	11	1206	BC	1.3	58	PR	24.4	1206	BC	25.5	1206	BC	34.7	1206	BC	28	1206	BC	21.7	1206	BC
41.7	1207	BC	18	1207	BC	7.3	1207	BC	0.4	116	DC	76.6	29	KS	11.1	1207	BC	1.3	59	PR	24.5	1207	BC	25.5	1207	BC	34.8	1207	BC	28	1207	BC	21.8	1207	BC
41.8	1208	BC	18	1208	BC	7.3	1208	BC	0.4	117	DC	81.8	30	KS	11.1	1208	BC	1.4	60	PR	24.5	1208	BC	25.5	1208	BC	34.9	1208	BC	28	1208	BC	21.8	1208	BC
41.8	1209	BC	18.1	1209	BC	7.3	1209	BC	0.4	118	DC	87.2	31	KS	11.1	1209	BC	1.4	61	PR	24.5	1209	BC	25.6	1209	BC	35	1209	BC	28	1209	BC	21.8	1209	BC
41.9	1210	BC	18.1	1210	BC	7.3	1210	BC	0.4	119	DC	93.5	32	KS	11.2	1210	BC	1.4	62	PR	24.6	1210	BC	25.6	1210	BC	35.1	1210	BC	28.1	1210	BC	21.9	1210	BC
41.9	1211	BC	18.1	1211	BC	7.3	1211	BC	0.4	120	DC	100	33	KS	11.2	1211	BC	1.4	63	PR	24.6	1211	BC	25.6	1211	BC	35.1	1211	BC	28.1	1211	BC	21.9	1211	BC
41.9	1212	BC	18.1	1212	BC	7.3	1212	BC	0.4	121	DC	0	1	PR	11.2	1212	BC	1.5	64	PR	24.6	1212	BC	25.6	1212	BC	35.2	1212	BC	28.1	1212	BC	22	1212	BC
42	1213	BC	18.1	1213	BC	7.4	1213	BC	0.4	122	DC	0	2	PR	11.3	1213	BC	1.5	65	PR	24.6	1213	BC	25.7	1213	BC	35.2	1213	BC	28.2	1213	BC	22.1	1213	BC
42	1214	BC	18.1	1214	BC	7.4	1214	BC	0.5	123	DC	0.1	3	PR	11.3	1214	BC	1.5	66	PR	24.7	1214	BC	25.7	1214	BC	35.3	1214	BC	28.2	1214	BC	22.2	1214	BC
42	1215	BC	18.2	1215	BC	7.4	1215	BC	0.5	124	DC	0.1	4	PR	11.3	1215	BC	1.6	67	PR	24.7	1215	BC	25.7	1215	BC	35.4	1215	BC	28.2	1215	BC	22.2	1215	BC
42.1	1216	BC	18.2	1216	BC	7.4	1216	BC	0.5	125	DC	0.1	5	PR	11.3	1216	BC	1.6	68	PR	24.7	1216	BC	25.8	1216	BC	35.4	1216	BC	28.2	1216	BC	22.3	1216	BC
42.2	1217	BC	18.2	1217	BC	7.4	1217	BC	0.5	126	DC	0.1	6	PR	11.4	1217	BC	1.6	69	PR	24.8	1217	BC	25.8	1217	BC	35.4	1217	BC	28.2	1217	BC	22.3	1217	BC
42.2	1218	BC	18.2	1218	BC	7.4	1218	BC	0.5	127	DC	0.2	7	PR	11.4	1218	BC	1.6	70	PR	24.8	1218	BC	25.8	1218	BC	35.5	1218	BC	28.3	1218	BC	22.4	1218	BC
42.3	1219	BC	18.3	1219	BC	7.4	1219	BC	0.5	128	DC	0.2	8	PR	11.4	1219	BC	1.6	71	PR	24.8	1219	BC	25.9	1219	BC	35.6	1219	BC	28.3	1219	BC	22.5	1219	BC
42.4	1220	BC	18.3	1220	BC	7.5	1220	BC	0.5	129	DC	0.2	9	PR	11.5	1220	BC	1.7	72	PR	24.9	1220	BC	25.9	1220	BC	35.6	1220	BC	28.3	1220	BC	22.5	1220	BC
42.4	1221	BC	18.3	1221	BC	7.5	1221	BC	0.5	130	DC	0.2	10	PR	11.5	1221	BC	1.7	73	PR	24.9	1221	BC	25.9	1221	BC	35.8	1221	BC	28.4	1221	BC	22.5	1221	BC
42.6	1222	BC	18.3	1222	BC	7.5	1222	BC	0.5	131	DC	0.2	11	PR	11.5	1222	BC	1.7	74	PR	24.9	1222	BC	25.9	1222	BC	35.8	1222	BC	28.4	1222	BC	22.6	1222	BC
42.6	1223	BC	18.4	1223	BC	7.5	1223	BC	0.5	132	DC	0.3	12	PR	11.5	1223	BC	1.7	75	PR	25	1223	BC	26	1223	BC	35.9	1223	BC	28.4	1223	BC	22.6	1223	BC
42.7	1224	BC	18.4	1224	BC	7.5	1224	BC	0.5	133	DC	0.3	13	PR	11.5	1224	BC	1.8	76	PR	25	1224	BC	26	1224	BC	36.1	1224	BC	28.5	1224	BC	22.7	1224	BC
42.8	1225	BC	18.4	1225	BC	7.6	1225	BC	0.5	134	DC	0.3	14	PR	11.6	1225	BC	1.8	77	PR	25	1225	BC	26	1225	BC	36.1	1225	BC	28.5	1225	BC	22.7	1225	BC
42.9	1226	BC	18.5	1226	BC	7.6	1226	BC	0.5	135	DC	0.3	15	PR	11.6	1226	BC	1.8	78	PR	25.1	1226	BC	26.1	1226	BC	36.2	1226	BC	28.5	1226	BC	22.8	1226	BC
43	1227	BC	18.5	1227	BC	7.6	1227	BC	0.5	136	DC	0.3	16	PR	11.6	1227	BC	1.8	79	PR	25.1	1227	BC	26.1	1227	BC	36.3	1227	BC	28.5	1227	BC	22.8	1227	BC
43.1	1228	BC	18.5	1228	BC	7.6	1228	BC	0.5	137	DC	0.4	17	PR	11.7	1228	BC	1.9	80	PR	25.1	1228	BC	26.1	1228	BC	36.3	1228	BC	28.6	1228	BC	22.9	1228	BC
43.3	1229	BC	18.5	1229	BC	7.6	1229	BC	0.5	138	DC	0.4	18	PR	11.7	1229	BC	1.9	81	PR	25.2	1229	BC	26.2	1229	BC	36.4	1229	BC	29.9	1229	BC	22.9	1229	BC
100	1230	BC	18.5	1230	BC	7.7	1230	BC	0.5	139	DC	0.4	19	PR	11.7	1230	BC	1.9	82	PR	25.2	1230	BC	26.2	1230	BC	36.5	1230	BC	29.9	1230	BC	23	1230	BC
0	1	DC	18.6	1231	BC	7.7	1231	BC	0.5	140	DC	0.5	20	PR	11.8	1231	BC	1.9	83	PR	25.2	1231	BC	26.2	1231	BC	36.6	1231	BC	30	1231	BC	23	1231	BC
0	2	DC	18.6	1232	BC	7.7	1232	BC	0.5	141	DC	0.5	21	PR	11.8	1232	BC	2	84	PR	25.2	1232	BC	26.2	1232	BC	36.7	1232	BC	30.1	1232	BC	23.1	1232	BC
0.1	3	DC	18.6	1233	BC	7.7	1233	BC	0.6	142	DC	0.5	22	PR	11.8	1233	BC	2	85	PR	25.3	1233	BC	26.3	1233	BC	36.9	1233	BC	30.1	1233	BC	23.2	1233	BC
0.1	4	DC	18.6	1234	BC	7.7	1234	BC	0.6	143	DC	0.5	23	PR	11.9	1234	BC	2	86	PR	25.3	1234	BC	26.3	1234	BC	36.9	1234	BC	30.1	1234	BC	23.2	1234	BC
0.2	5	DC	18.7	1235	BC	7.8	1235	BC	0.6	144	DC	0.5	24	PR	11.9	1235	BC	2	87	PR	25.3	1235	BC	26.3	1235	BC	37	1235	BC	30.1	1235	BC	23.3	1235	BC
0.2	6	DC	18.7	1236	BC	7.8	1236	BC	0.6	145	DC	0.6	25	PR	11.9	1236	BC	2.1	88	PR	25.3	1236	BC	26.3	1236	BC	37.1	1236	BC	30.2	1236	BC	23.3	1236	BC
0.2	7	DC	18.7	1237	BC	7.8	1237	BC	0.6	146	DC	0.6	26	PR	12	1237	BC	2.1	89	PR	25.3	1237	BC	26.4	1237	BC	37.2	1237	BC	30.2	1237	BC	23.4	1237	BC
0.2	8	DC	18.8	1238	BC	7.8	1238	BC	0.6	147	DC	0.6	27	PR	12	1238	BC	2.1	90	PR	25.4	1238	BC	26.4	1238	BC	37.3	1238	BC	30.2	1238	BC	23.5	1238	BC
0.3	9	DC	18.8	1239	BC	7.9	1239	BC	0.6	148	DC	0.6	28	PR	12	1239	BC	2.2	91	PR	25.4	1239	BC	26.4	1239	BC	37.5	1239	BC	30.3	1239	BC	23.6	1239	BC
0.3	10	DC	18.8	1240	BC	7.9	1240	BC	0.6	149	DC	0.6	29	PR	12.1	1240	BC	2.2	92	PR	25.4	1240	BC	26.5	1240	BC	37.6	1240	BC	30.3	1240	BC	23.7	1240	BC
0.3	11	DC	18.8	1241	BC	7.9	1241	BC	0.6	150	DC	0.7	30	PR	12.1	1241	BC	2.2	93	PR	25.4	1241	BC	26.5	1241	BC	37.6	1241	BC	30.3	1241	BC	23.7	1241	BC
0.3	12	DC	18.9	1242	BC	7.9	1242	BC	0.6	151	DC	0.7	31	PR	12.2	1242	BC	2.2	94	PR	25.4	1242	BC	26.5	1242	BC	37.8	1242	BC	30.3	1242	BC	23.8	1242	BC
0.4	13	DC	18.9	1243	BC	7.9	1243	BC	0.6	152	DC	0.7	32	PR	12.2	1243	BC	2.3	95	PR	25.5	1243	BC	26.5	1243	BC	37.8	1243	BC	30.3	1243	BC	23.8	1243	BC
0.4	14	DC	19	1244	BC	7.9	1244	BC	0.6	153	DC	0.7	33	PR	12.3	1244	BC	2.3	96	PR	25.5	1244	BC	26.6	1244	BC	37.9	1244	BC	30.4	1244	BC	23.9	1244	BC
0.5	15	DC	19	1245	BC	8	1245	BC	0.6	154	DC	0.8	34	PR	12.4	1245	BC	2.3	97	PR	25.5	1245	BC	26.6	1245	BC	38	1245	BC	30.4	1245	BC	24	1245	BC
0.5	16	DC	19	1246	BC	8	1246	BC	0.6	155	DC	0.8	35	PR	12.5	1246	BC	2.3	98	PR	25.5	1246	BC	26.6	1246	BC	38.1	1246	BC	30.4	1246	BC	24	1246	BC
0.5	17	DC	19	1247	BC	8	1247	BC	0.6	156	DC	0.8	36	PR	12.5	1247	BC	2.4	99	PR	25.6	1247	BC	26.7	1247	BC	38.2	1247	BC	30.4	1247	BC	24.1	1247	BC
0.6	18	DC	19	1248	BC	8	1248	BC	0.6	157	DC	0.8	37	PR	12.5	1248	BC	2.4	100	PR	25.6	1248	BC	26.7	1248	BC	38.3	1248	BC	30.4	1248	BC	24.1	1248	BC
0.7	19	DC	19	1249	BC	8	1249	BC	0.6	158	DC	0.9	38	PR	12.6	1249	BC	2.4	101	PR	25.6	1249	BC	26.7	1249	BC	38.4	1249	BC	30.5	1249	BC	24.2	1249	BC
0.8	20	DC	19	1250	BC	8	1250	BC	0.6	159	DC	0.9	39	PR	12.6	1250	BC	2.5	102	PR	25.6	1250	BC	26.8	1250	BC	38.5	1250	BC	30.5	1250	BC	24.2	1250	BC
0.8	21	DC	19.1	1251	BC	8	1251	BC	0.7	160	DC	0.9	40	PR	12.6	1251	BC	2.5	103	PR	25.7	1251	BC	26.8	1251	BC	38.5	1251	BC	30.5	1251	BC	24.3	1251	BC
1.2	22	DC	19.1	1252	BC	8	1252	BC	0.7	161	DC	0.9	41	PR	12.7	1252	BC	2.5	104	PR	25.7	1252	BC	26.9	1252	BC	38.8	1252	BC	30.5	1252	BC	24.4	1252	BC
1.2	23	DC	19.1	1253	BC	8.1	1253	BC	0.7	162	DC	0.9	42	PR	12.7	1253	BC	2.5	105	PR	25.7	1253	BC	26.9	1253	BC	38.8	1253	BC	30.6	1253	BC	24.4	1253	BC
1.2	24	DC	19.2	1254	BC	8.1	1254	BC	0.7	163	DC	1	43	PR	12.7	1254	BC	2.6	106	PR	25.7	1254	BC	26.9	1254	BC	38.9	1254	BC	30.6	1254	BC	24.5	1254	BC
1.7	25	DC	19.2	1255	BC	8.1	1255	BC	0.7	164	DC	1	44	PR	12.7	1255	BC	2.6	107	PR	25.8	1255	BC	27	1255	BC	39	1255	BC	30.6	1255	BC	24.6	1255	BC
1.8	26	DC	19.2	1256	BC	8.1	1256	BC	0.7	165	DC	1	45	PR	12.8	1256	BC	2.6	108	PR	25.8	1256	BC	27	1256	BC	39.1	1256	BC	30.6	1256	BC	24.6	1256	BC
1.8	27	DC	19.3	1257	BC	8.1	1257	BC	0.7	166	DC	1	46	PR	12.8	1257	BC	2.6	109	PR	25.8	1257	BC	27.1	1257	BC	39.2	1257	BC	30.7	1257	BC	24.7	1257	BC
1.8	28	DC	19.3	1258	BC	8.1	1258	BC	0.7	167	DC	1.1	47	PR	12.9	1258	BC	2.7	110	PR	25.8	1258	BC	27.1	1258	BC	39.3	1258	BC	30.7	1258	BC	24.8	1258	BC
1.9	29	DC	19.3	1259	BC	8.2	1259	BC	0.7	168	DC	1.1	48	PR	12.9	1259	BC	2.7	111	PR	25.9	1259	BC	27.1	1259	BC	39.3	1259	BC	30.7	1259	BC	24.9	1259	BC
2	30	DC	19.3	1260	BC	8.2	1260	BC	0.7	169	DC	1.1	49	PR	13	1260	BC	2.7	112	PR	25.9	1260	BC	27.2	1260	BC	39.4	1260	BC	30.7	1260	BC	24.9	1260	BC
2	31	DC	19.3	1261	BC	8.2	1261	BC	0.7	170	DC	1.1	50	PR	13	1261	BC	2.8	113	PR	25.9	1261	BC	27.2	1261	BC	39.6	1261	BC	30.8	1261	BC	25	1261	BC
2.9	32	DC	19.4	1262	BC	8.2	1262	BC	0.7	171	DC	1.2	51	PR	13	1262	BC	2.8	114	PR	25.9	1262	BC	27.2	1262	BC	39.7	1262	BC	30.8	1262	BC	25.1	1262	BC
3.1	33	DC	19.4	1263	BC	8.2	1263	BC	0.8	172	DC	1.2	52	PR	13.1	1263	BC	2.8	115	PR	26	1263	BC	27.3	1263	BC	39.7	1263	BC	30.8	1263	BC	25.1	1263	BC
3.2	34	DC	19.4	1264	BC	8.2	1264	BC	0.8	173	DC	1.2	53	PR	13.1	1264	BC	2.8	116	PR	26	1264	BC	27.3	1264	BC	39.9	1264	BC	30.8	1264	BC	25.2	1264	BC
3.4	35	DC	19.4	1265	BC	8.3	1265	BC	0.8	174	DC	1.2	54	PR	13.2	1265	BC	2.9	117	PR	26	1265	BC	27.4	1265	BC	40	1265	BC	30.9	1265	BC	25.3	1265	BC
3.6	36	DC	19.4	1266	BC	8.3	1266	BC	0.8	175	DC	1.2	55	PR	13.2	1266	BC	2.9	118	PR	26	1266	BC	27.4	1266	BC	40.1	1266	BC	30.9	1266	BC	25.3	1266	BC
3.7	37	DC	19.4	1267	BC	8.3	1267	BC	0.8	176	DC	1.3	56	PR	13.3	1267	BC	2.9	119	PR	26.1	1267	BC	27.4	1267	BC	40.3	1267	BC	30.9	1267	BC	25.4	1267	BC
3.8	38	DC	19.5	1268	BC	8.3	1268	BC	0.8	177	DC	1.3	57	PR	13.3	1268	BC	2.9	120	PR	26.1	1268	BC	27.5	1268	BC	40.3	1268	BC	30.9	1268	BC	25.5	1268	BC
3.8	39	DC	19.5	1269	BC	8.3	1269	BC	0.8	178	DC	1.3	58	PR	13.3	1269	BC	2.9	121	PR	26.1	1269	BC	27.5	1269	BC	40.4	1269	BC	31	1269	BC	25.5	1269	BC
4	40	DC	19.5	1270	BC	8.3	1270	BC	0.8	179	DC	1.3	59	PR	13.4	1270	BC	3	122	PR	26.2	1270	BC	27.6	1270	BC	40.5	1270	BC	31	1270	BC	25.6	1270	BC
4.2	41	DC	19.5	1271	BC	8.4	1271	BC	0.8	180	DC	1.4	60	PR	13.4	1271	BC	3	123	PR	26.2	1271	BC	27.6	1271	BC	40.6	1271	BC	31	1271	BC	25.6	1271	BC
4.4	42	DC	19.5	1272	BC	8.4	1272	BC	0.8	181	DC	1.4	61	PR	13.5	1272	BC	3	124	PR	26.2	1272	BC	27.6	1272	BC	40.7	1272	BC	31	1272	BC	25.8	1272	BC
5.5	43	DC	19.6	1273	BC	8.4	1273	BC	0.8	182	DC	1.4	62	PR	13.5	1273	BC	3	125	PR	26.3	1273	BC	27.7	1273	BC	40.7	1273	BC	31	1273	BC	25.8	1273	BC
5.7	44	DC	19.6	1274	BC	8.4	1274	BC	0.9	183	DC	1.4	63	PR	13.6	1274	BC	3.1	126	PR	26.3	1274	BC	27.7	1274	BC	40.8	1274	BC	31.1	1274	BC	26	1274	BC
6.1	45	DC	19.6	1275	BC	8.4	1275	BC	0.9	184	DC	1.5	64	PR	13.6	1275	BC	3.1	127	PR	26.3	1275	BC	27.8	1275	BC	40.9	1275	BC	31.1	1275	BC	26.1	1275	BC
6.8	46	DC	19.6	1276	BC	8.5	1276	BC	0.9	185	DC	1.5	65	PR	13.6	1276	BC	3.1	128	PR	26.4	1276	BC	27.8	1276	BC	41	1276	BC	31.1	1276	BC	26.2	1276	BC
7.2	47	DC	19.7	1277	BC	8.5	1277	BC	0.9	186	DC	1.5	66	PR	13.7	1277	BC	3.1	129	PR	26.4	1277	BC	27.9	1277	BC	41.1	1277	BC	31.2	1277	BC	26.3	1277	BC
7.7	48	DC	19.7	1278	BC	8.5	1278	BC	0.9	187	DC	1.5	67	PR	13.8	1278	BC	3.1	130	PR	26.4	1278	BC	27.9	1278	BC	41.2	1278	BC	31.2	1278	BC	26.4	1278	BC
8.8	49	DC	20.2	1279	BC	8.5	1279	BC	0.9	188	DC	1.5	68	PR	13.8	1279	BC	3.2	131	PR	26.4	1279	BC	28	1279	BC	41.4	1279	BC	31.2	1279	BC	26.5	1279	BC
9.4	50	DC	20.2	1280	BC	8.5	1280	BC	0.9	189	DC	1.6	69	PR	13.9	1280	BC	3.2	132	PR	26.5	1280	BC	28	1280	BC	41.5	1280	BC	31.2	1280	BC	26.6	1280	BC
10.5	51	DC	20.2	1281	BC	8.6	1281	BC	0.9	190	DC	1.6	70	PR	13.9	1281	BC	3.2	133	PR	26.5	1281	BC	28.1	1281	BC	41.7	1281	BC	31.3	1281	BC	26.8	1281	BC
11.4	52	DC	20.2	1282	BC	8.6	1282	BC	0.9	191	DC	1.6	71	PR	13.9	1282	BC	3.2	134	PR	26.5	1282	BC	28.1	1282	BC	41.9	1282	BC	31.3	1282	BC	26.9	1282	BC
12.8	53	DC	20.2	1283	BC	8.6	1283	BC	1	192	DC	1.6	72	PR	14	1283	BC	3.3	135	PR	26.6	1283	BC	28.2	1283	BC	42	1283	BC	31.3	1283	BC	27	1283	BC
13.9	54	DC	20.3	1284	BC	8.6	1284	BC	1	193	DC	1.7	73	PR	14.1	1284	BC	3.3	136	PR	26.6	1284	BC	28.2	1284	BC	42.2	1284	BC	31.3	1284	BC	27.2	1284	BC
15.5	55	DC	20.3	1285	BC	8.7	1285	BC	1	194	DC	1.7	74	PR	14.1	1285	BC	3.3	137	PR	26.6	1285	BC	28.3	1285	BC	42.2	1285	BC	31.4	1285	BC	27.3	1285	BC
17.7	56	DC	20.3	1286	BC	8.7	1286	BC	1	195	DC	1.7	75	PR	14.2	1286	BC	3.4	138	PR	26.6	1286	BC	28.3	1286	BC	42.4	1286	BC	31.4	1286	BC	27.5	1286	BC
20.1	57	DC	20.3	1287	BC	8.7	1287	BC	1	196	DC	1.7	76	PR	14.2	1287	BC	3.4	139	PR	26.7	1287	BC	28.4	1287	BC	42.4	1287	BC	31.4	1287	BC	27.7	1287	BC
23.4	58	DC	20.3	1288	BC	8.7	1288	BC	1	197	DC	1.7	77	PR	14.3	1288	BC	3.4	140	PR	26.7	1288	BC	28.4	1288	BC	42.6	1288	BC	31.5	1288	BC	27.9	1288	BC
27.1	59	DC	20.4	1289	BC	8.7	1289	BC	1	198	DC	1.8	78	PR	14.3	1289	BC	3.4	141	PR	26.7	1289	BC	28.5	1289	BC	42.7	1289	BC	31.5	1289	BC	28.1	1289	BC
32	60	DC	20.4	1290	BC	8.7	1290	BC	1.1	199	DC	1.8	79	PR	14.4	1290	BC	3.5	142	PR	26.7	1290	BC	28.5	1290	BC	42.9	1290	BC	31.5	1290	BC	28.3	1290	BC
38.2	61	DC	20.4	1291	BC	8.8	1291	BC	1.1	200	DC	1.8	80	PR	14.4	1291	BC	3.5	143	PR	26.8	1291	BC	28.6	1291	BC	43	1291	BC	31.6	1291	BC	28.6	1291	BC
48.5	62	DC	20.4	1292	BC	8.8	1292	BC	1.1	201	DC	1.8	81	PR	14.4	1292	BC	3.5	144	PR	26.8	1292	BC	28.7	1292	BC	43.2	1292	BC	31.6	1292	BC	30.4	1292	BC
64.8	63	DC	20.4	1293	BC	8.8	1293	BC	1.1	202	DC	1.9	82	PR	14.5	1293	BC	3.5	145	PR	26.8	1293	BC	28.8	1293	BC	43.3	1293	BC	31.7	1293	BC	30.5	1293	BC
83.8	64	DC	20.4	1294	BC	8.8	1294	BC	1.1	203	DC	1.9	83	PR	14.5	1294	BC	3.6	146	PR	26.9	1294	BC	28.8	1294	BC	43.4	1294	BC	31.7	1294	BC	30.5	1294	BC
100	65	DC	20.5	1295	BC	8.8	1295	BC	1.1	204	DC	1.9	84	PR	14.6	1295	BC	3.6	147	PR	26.9	1295	BC	28.9	1295	BC	43.6	1295	BC	31.8	1295	BC	30.7	1295	BC
1.1	1	KS	20.5	1296	BC	8.8	1296	BC	1.1	205	DC	1.9	85	PR	14.6	1296	BC	3.6	148	PR	26.9	1296	BC	29	1296	BC	43.7	1296	BC	31.8	1296	BC	30.7	1296	BC
1.1	2	KS	20.5	1297	BC	8.9	1297	BC	1.1	206	DC	1.9	86	PR	14.7	1297	BC	3.6	149	PR	26.9	1297	BC	29.1	1297	BC	43.8	1297	BC	31.8	1297	BC	30.8	1297	BC
1.9	3	KS	20.5	1298	BC	8.9	1298	BC	1.1	207	DC	2	87	PR	14.8	1298	BC	3.7	150	PR	26.9	1298	BC	29.1	1298	BC	44	1298	BC	31.8	1298	BC	30.9	1298	BC
2.8	4	KS	20.5	1299	BC	8.9	1299	BC	1.1	208	DC	2	88	PR	14.8	1299	BC	3.7	151	PR	27	1299	BC	29.2	1299	BC	44.3	1299	BC	31.9	1299	BC	30.9	1299	BC
3	5	KS	20.5	1300	BC	8.9	1300	BC	1.2	209	DC	2	89	PR	14.9	1300	BC	3.7	152	PR	27	1300	BC	29.3	1300	BC	44.4	1300	BC	31.9	1300	BC	31	1300	BC
3	6	KS	20.5	1301	BC	8.9	1301	BC	1.2	210	DC	2	90	PR	14.9	1301	BC	3.7	153	PR	27	1301	BC	29.4	1301	BC	44.6	1301	BC	31.9	1301	BC	31.1	1301	BC
3.6	7	KS	20.5	1302	BC	9	1302	BC	1.2	211	DC	2	91	PR	15	1302	BC	3.8	154	PR	27.1	1302	BC	29.5	1302	BC	44.7	1302	BC	32	1302	BC	31.1	1302	BC
4.1	8	KS	20.6	1303	BC	9	1303	BC	1.2	212	DC	2.1	92	PR	15	1303	BC	3.8	155	PR	27.1	1303	BC	29.5	1303	BC	44.9	1303	BC	32	1303	BC	31.2	1303	BC
4.6	9	KS	20.6	1304	BC	9	1304	BC	1.2	213	DC	2.1	93	PR	15.1	1304	BC	3.8	156	PR	27.1	1304	BC	29.6	1304	BC	45	1304	BC	32	1304	BC	31.3	1304	BC
4.6	10	KS	20.7	1305	BC	9.1	1305	BC	1.2	214	DC	2.1	94	PR	15.2	1305	BC	3.9	157	PR	27.1	1305	BC	29.7	1305	BC	45.2	1305	BC	32	1305	BC	31.3	1305	BC
5.5	11	KS	20.7	1306	BC	9.1	1306	BC	1.2	215	DC	2.1	95	PR	15.2	1306	BC	3.9	158	PR	27.2	1306	BC	29.8	1306	BC	45.3	1306	BC	32	1306	BC	31.4	1306	BC
5.9	12	KS	20.7	1307	BC	9.1	1307	BC	1.3	216	DC	2.2	96	PR	15.3	1307	BC	3.9	159	PR	27.2	1307	BC	29.9	1307	BC	45.4	1307	BC	32.1	1307	BC	31.5	1307	BC
6.2	13	KS	20.7	1308	BC	9.1	1308	BC	1.3	217	DC	2.2	97	PR	15.4	1308	BC	3.9	160	PR	27.2	1308	BC	30	1308	BC	45.5	1308	BC	32.1	1308	BC	31.5	1308	BC
6.6	14	KS	20.7	1309	BC	9.2	1309	BC	1.3	218	DC	2.2	98	PR	15.4	1309	BC	3.9	161	PR	27.3	1309	BC	30.1	1309	BC	45.9	1309	BC	32.1	1309	BC	31.6	1309	BC
6.7	15	KS	20.7	1310	BC	9.2	1310	BC	1.3	219	DC	2.2	99	PR	15.5	1310	BC	4	162	PR	27.3	1310	BC	30.2	1310	BC	46	1310	BC	32.1	1310	BC	31.7	1310	BC
7.6	16	KS	20.8	1311	BC	9.2	1311	BC	1.3	220	DC	2.3	100	PR	15.6	1311	BC	4	163	PR	27.3	1311	BC	30.3	1311	BC	46.2	1311	BC	32.2	1311	BC	31.8	1311	BC
7.7	17	KS	20.8	1312	BC	9.2	1312	BC	1.3	221	DC	2.3	101	PR	15.6	1312	BC	4	164	PR	27.4	1312	BC	30.4	1312	BC	46.4	1312	BC	32.2	1312	BC	31.8	1312	BC
8.7	18	KS	20.8	1313	BC	9.2	1313	BC	1.4	222	DC	2.3	102	PR	15.6	1313	BC	4	165	PR	27.4	1313	BC	30.5	1313	BC	46.6	1313	BC	32.2	1313	BC	31.9	1313	BC
9.7	19	KS	20.8	1314	BC	9.2	1314	BC	1.4	223	DC	2.3	103	PR	15.7	1314	BC	4.1	166	PR	27.4	1314	BC	30.6	1314	BC	46.9	1314	BC	32.2	1314	BC	32	1314	BC
10.9	20	KS	20.8	1315	BC	9.2	1315	BC	1.4	224	DC	2.3	104	PR	15.7	1315	BC	4.1	167	PR	27.5	1315	BC	30.7	1315	BC	47.2	1315	BC	32.2	1315	BC	32.2	1315	BC
13.3	21	KS	20.9	1316	BC	9.3	1316	BC	1.4	225	DC	2.4	105	PR	15.8	1316	BC	4.1	168	PR	27.5	1316	BC	30.8	1316	BC	47.5	1316	BC	32.3	1316	BC	32.3	1316	BC
21.1	22	KS	20.9	1317	BC	9.3	1317	BC	1.4	226	DC	2.4	106	PR	15.9	1317	BC	4.1	169	PR	27.5	1317	BC	30.9	1317	BC	47.9	1317	BC	32.3	1317	BC	32.4	1317	BC
36	23	KS	20.9	1318	BC	9.3	1318	BC	1.4	227	DC	2.4	107	PR	15.9	1318	BC	4.2	170	PR	27.6	1318	BC	31.1	1318	BC	48.1	1318	BC	32.3	1318	BC	32.5	1318	BC
58.5	24	KS	21	1319	BC	9.3	1319	BC	1.5	228	DC	2.5	108	PR	16	1319	BC	4.2	171	PR	27.7	1319	BC	31.1	1319	BC	48.3	1319	BC	32.3	1319	BC	32.5	1319	BC
82.1	25	KS	21	1320	BC	9.3	1320	BC	1.5	229	DC	2.5	109	PR	16	1320	BC	4.2	172	PR	27.7	1320	BC	31.3	1320	BC	48.5	1320	BC	32.4	1320	BC	32.6	1320	BC
100	26	KS	21	1321	BC	9.4	1321	BC	1.5	230	DC	2.5	110	PR	16.1	1321	BC	4.2	173	PR	27.7	1321	BC	31.4	1321	BC	48.7	1321	BC	32.4	1321	BC	32.7	1321	BC
0	1	PR	21.1	1322	BC	9.4	1322	BC	1.5	231	DC	2.5	111	PR	16.2	1322	BC	4.2	174	PR	27.8	1322	BC	31.6	1322	BC	49	1322	BC	32.4	1322	BC	32.7	1322	BC
0	2	PR	21.1	1323	BC	9.4	1323	BC	1.6	232	DC	2.5	112	PR	16.2	1323	BC	4.3	175	PR	27.8	1323	BC	31.7	1323	BC	49.3	1323	BC	32.4	1323	BC	32.8	1323	BC
0.1	3	PR	21.1	1324	BC	9.4	1324	BC	1.6	233	DC	2.6	113	PR	16.3	1324	BC	4.3	176	PR	27.8	1324	BC	31.9	1324	BC	49.7	1324	BC	32.4	1324	BC	32.9	1324	BC
0.1	4	PR	21.2	1325	BC	9.4	1325	BC	1.6	234	DC	2.6	114	PR	16.4	1325	BC	4.3	177	PR	27.9	1325	BC	32	1325	BC	50	1325	BC	32.5	1325	BC	33	1325	BC
0.1	5	PR	21.2	1326	BC	9.5	1326	BC	1.6	235	DC	2.6	115	PR	16.4	1326	BC	4.4	178	PR	27.9	1326	BC	32.1	1326	BC	50.2	1326	BC	32.5	1326	BC	33.1	1326	BC
0.1	6	PR	21.2	1327	BC	9.5	1327	BC	1.7	236	DC	2.7	116	PR	16.5	1327	BC	4.4	179	PR	28	1327	BC	32.2	1327	BC	50.5	1327	BC	32.5	1327	BC	33.2	1327	BC
0.2	7	PR	21.2	1328	BC	9.5	1328	BC	1.7	237	DC	2.7	117	PR	16.5	1328	BC	4.4	180	PR	28	1328	BC	32.4	1328	BC	50.7	1328	BC	32.5	1328	BC	33.3	1328	BC
0.2	8	PR	21.2	1329	BC	9.5	1329	BC	1.7	238	DC	2.7	118	PR	16.6	1329	BC	4.4	181	PR	28.1	1329	BC	32.5	1329	BC	51	1329	BC	32.6	1329	BC	33.3	1329	BC
0.2	9	PR	21.2	1330	BC	9.5	1330	BC	1.7	239	DC	2.7	119	PR	16.7	1330	BC	4.4	182	PR	28.1	1330	BC	32.6	1330	BC	51.3	1330	BC	32.6	1330	BC	33.4	1330	BC
0.2	10	PR	21.2	1331	BC	9.5	1331	BC	1.7	240	DC	2.8	120	PR	16.8	1331	BC	4.5	183	PR	28.1	1331	BC	32.8	1331	BC	51.5	1331	BC	32.6	1331	BC	33.5	1331	BC
0.3	11	PR	21.3	1332	BC	9.6	1332	BC	1.8	241	DC	2.8	121	PR	17	1332	BC	4.5	184	PR	28.2	1332	BC	33	1332	BC	51.8	1332	BC	32.7	1332	BC	33.6	1332	BC
0.3	12	PR	21.3	1333	BC	9.6	1333	BC	1.8	242	DC	2.8	122	PR	17.1	1333	BC	4.6	185	PR	28.2	1333	BC	33.1	1333	BC	52	1333	BC	32.7	1333	BC	33.7	1333	BC
0.3	13	PR	21.3	1334	BC	9.6	1334	BC	1.8	243	DC	2.8	123	PR	17.4	1334	BC	4.6	186	PR	28.3	1334	BC	33.3	1334	BC	52.5	1334	BC	32.7	1334	BC	33.8	1334	BC
0.3	14	PR	21.3	1335	BC	9.6	1335	BC	1.8	244	DC	2.9	124	PR	17.5	1335	BC	4.7	187	PR	28.3	1335	BC	33.5	1335	BC	52.8	1335	BC	32.7	1335	BC	33.9	1335	BC
0.4	15	PR	21.3	1336	BC	9.6	1336	BC	1.9	245	DC	2.9	125	PR	17.6	1336	BC	4.7	188	PR	28.4	1336	BC	33.6	1336	BC	53.2	1336	BC	32.8	1336	BC	34	1336	BC
0.4	16	PR	21.4	1337	BC	9.6	1337	BC	1.9	246	DC	2.9	126	PR	17.7	1337	BC	4.7	189	PR	28.4	1337	BC	33.8	1337	BC	53.5	1337	BC	32.8	1337	BC	34.1	1337	BC
0.5	17	PR	21.4	1338	BC	9.7	1338	BC	1.9	247	DC	2.9	127	PR	17.7	1338	BC	4.8	190	PR	28.5	1338	BC	34	1338	BC	54	1338	BC	32.8	1338	BC	34.2	1338	BC
0.5	18	PR	21.4	1339	BC	9.7	1339	BC	1.9	248	DC	2.9	128	PR	17.8	1339	BC	4.8	191	PR	28.5	1339	BC	34.2	1339	BC	54.2	1339	BC	32.9	1339	BC	34.2	1339	BC
0.5	19	PR	21.5	1340	BC	9.7	1340	BC	2	249	DC	3	129	PR	17.8	1340	BC	4.9	192	PR	28.6	1340	BC	34.4	1340	BC	54.7	1340	BC	32.9	1340	BC	34.4	1340	BC
0.5	20	PR	21.5	1341	BC	9.7	1341	BC	2	250	DC	3	130	PR	17.9	1341	BC	4.9	193	PR	28.6	1341	BC	34.6	1341	BC	55	1341	BC	32.9	1341	BC	34.5	1341	BC
0.6	21	PR	21.5	1342	BC	9.8	1342	BC	2.1	251	DC	3.1	131	PR	18	1342	BC	4.9	194	PR	28.7	1342	BC	34.8	1342	BC	55.3	1342	BC	32.9	1342	BC	34.6	1342	BC
0.6	22	PR	21.5	1343	BC	9.8	1343	BC	2.1	252	DC	3.1	132	PR	18	1343	BC	4.9	195	PR	28.7	1343	BC	34.9	1343	BC	55.7	1343	BC	32.9	1343	BC	34.7	1343	BC
0.6	23	PR	21.6	1344	BC	9.8	1344	BC	2.1	253	DC	3.1	133	PR	18.1	1344	BC	4.9	196	PR	28.8	1344	BC	35.2	1344	BC	56.2	1344	BC	33	1344	BC	34.8	1344	BC
0.6	24	PR	21.6	1345	BC	9.9	1345	BC	2.2	254	DC	3.1	134	PR	18.2	1345	BC	5	197	PR	28.8	1345	BC	35.4	1345	BC	56.6	1345	BC	33	1345	BC	34.8	1345	BC
0.6	25	PR	21.6	1346	BC	9.9	1346	BC	2.2	255	DC	3.2	135	PR	18.3	1346	BC	5	198	PR	28.9	1346	BC	35.6	1346	BC	57.1	1346	BC	33	1346	BC	34.9	1346	BC
0.7	26	PR	21.6	1347	BC	9.9	1347	BC	2.2	256	DC	3.2	136	PR	18.3	1347	BC	5	199	PR	28.9	1347	BC	35.8	1347	BC	57.4	1347	BC	33	1347	BC	34.9	1347	BC
0.7	27	PR	21.7	1348	BC	10	1348	BC	2.3	257	DC	3.2	137	PR	18.4	1348	BC	5	200	PR	29	1348	BC	36.1	1348	BC	57.9	1348	BC	33.1	1348	BC	35.1	1348	BC
0.7	28	PR	21.7	1349	BC	10	1349	BC	2.3	258	DC	3.2	138	PR	18.5	1349	BC	5.1	201	PR	29	1349	BC	36.4	1349	BC	58.5	1349	BC	33.1	1349	BC	35.1	1349	BC
0.7	29	PR	21.8	1350	BC	10	1350	BC	2.3	259	DC	3.3	139	PR	18.5	1350	BC	5.1	202	PR	29.1	1350	BC	36.6	1350	BC	59	1350	BC	33.2	1350	BC	35.2	1350	BC
0.8	30	PR	21.8	1351	BC	10	1351	BC	2.4	260	DC	3.3	140	PR	18.6	1351	BC	5.2	203	PR	29.1	1351	BC	36.9	1351	BC	59.5	1351	BC	33.2	1351	BC	35.3	1351	BC
0.8	31	PR	21.8	1352	BC	10.1	1352	BC	2.4	261	DC	3.3	141	PR	18.6	1352	BC	5.2	204	PR	29.2	1352	BC	37.3	1352	BC	60.1	1352	BC	33.2	1352	BC	35.3	1352	BC
0.8	32	PR	21.8	1353	BC	10.1	1353	BC	2.5	262	DC	3.4	142	PR	18.7	1353	BC	5.2	205	PR	29.3	1353	BC	37.6	1353	BC	60.6	1353	BC	33.2	1353	BC	35.5	1353	BC
0.8	33	PR	21.9	1354	BC	10.1	1354	BC	2.6	263	DC	3.4	143	PR	18.8	1354	BC	5.2	206	PR	29.3	1354	BC	37.9	1354	BC	61.2	1354	BC	33.3	1354	BC	35.6	1354	BC
0.9	34	PR	21.9	1355	BC	10.1	1355	BC	2.6	264	DC	3.4	144	PR	18.9	1355	BC	5.3	207	PR	29.4	1355	BC	38.3	1355	BC	61.9	1355	BC	33.3	1355	BC	35.7	1355	BC
0.9	35	PR	21.9	1356	BC	10.2	1356	BC	2.6	265	DC	3.4	145	PR	19	1356	BC	5.3	208	PR	29.5	1356	BC	38.8	1356	BC	62.8	1356	BC	33.3	1356	BC	35.7	1356	BC
0.9	36	PR	21.9	1357	BC	10.2	1357	BC	2.7	266	DC	3.5	146	PR	19	1357	BC	5.3	209	PR	29.5	1357	BC	39.2	1357	BC	63.7	1357	BC	33.3	1357	BC	35.8	1357	BC
1	37	PR	21.9	1358	BC	10.2	1358	BC	2.8	267	DC	3.5	147	PR	19.1	1358	BC	5.4	210	PR	29.6	1358	BC	39.8	1358	BC	64.6	1358	BC	33.4	1358	BC	36	1358	BC
1	38	PR	22	1359	BC	10.2	1359	BC	2.8	268	DC	3.5	148	PR	19.2	1359	BC	5.4	211	PR	29.7	1359	BC	40.3	1359	BC	65.8	1359	BC	33.4	1359	BC	36.1	1359	BC
1	39	PR	22	1360	BC	10.3	1360	BC	2.9	269	DC	3.5	149	PR	19.3	1360	BC	5.4	212	PR	29.7	1360	BC	40.7	1360	BC	66.8	1360	BC	33.4	1360	BC	36.1	1360	BC
1	40	PR	22	1361	BC	10.3	1361	BC	2.9	270	DC	3.5	150	PR	19.3	1361	BC	5.5	213	PR	29.8	1361	BC	41.2	1361	BC	68.3	1361	BC	33.5	1361	BC	36.3	1361	BC
1.1	41	PR	22.1	1362	BC	10.3	1362	BC	3	271	DC	3.6	151	PR	19.4	1362	BC	5.5	214	PR	29.9	1362	BC	41.7	1362	BC	70.3	1362	BC	33.5	1362	BC	36.4	1362	BC
1.1	42	PR	22.1	1363	BC	10.3	1363	BC	3	272	DC	3.6	152	PR	19.5	1363	BC	5.5	215	PR	30	1363	BC	42.2	1363	BC	72.6	1363	BC	33.5	1363	BC	36.5	1363	BC
1.1	43	PR	22.1	1364	BC	10.3	1364	BC	3.1	273	DC	3.6	153	PR	19.6	1364	BC	5.6	216	PR	30.1	1364	BC	42.8	1364	BC	76.1	1364	BC	33.6	1364	BC	36.6	1364	BC
1.1	44	PR	22.1	1365	BC	10.4	1365	BC	3.2	274	DC	3.6	154	PR	19.6	1365	BC	5.6	217	PR	30.2	1365	BC	43.4	1365	BC	100	1365	BC	33.6	1365	BC	36.7	1365	BC
1.2	45	PR	22.1	1366	BC	10.4	1366	BC	3.2	275	DC	3.7	155	PR	19.7	1366	BC	5.6	218	PR	30.3	1366	BC	44.2	1366	BC	0	1	DC	33.6	1366	BC	36.9	1366	BC
1.2	46	PR	22.1	1367	BC	10.4	1367	BC	3.3	276	DC	3.7	156	PR	19.8	1367	BC	5.7	219	PR	30.4	1367	BC	45.2	1367	BC	0	2	DC	33.7	1367	BC	37	1367	BC
1.2	47	PR	22.1	1368	BC	10.5	1368	BC	3.4	277	DC	3.7	157	PR	19.8	1368	BC	5.7	220	PR	30.5	1368	BC	46.6	1368	BC	0.1	3	DC	33.7	1368	BC	37.1	1368	BC
1.3	48	PR	22.2	1369	BC	10.5	1369	BC	3.5	278	DC	3.7	158	PR	19.9	1369	BC	5.7	221	PR	30.6	1369	BC	48.2	1369	BC	0.1	4	DC	33.7	1369	BC	37.2	1369	BC
1.3	49	PR	22.2	1370	BC	10.5	1370	BC	3.5	279	DC	3.7	159	PR	20	1370	BC	5.7	222	PR	30.7	1370	BC	50.3	1370	BC	0.1	5	DC	33.8	1370	BC	37.3	1370	BC
1.3	50	PR	22.2	1371	BC	10.6	1371	BC	3.6	280	DC	3.8	160	PR	20.1	1371	BC	5.8	223	PR	30.8	1371	BC	52.2	1371	BC	0.1	6	DC	33.8	1371	BC	37.4	1371	BC
1.3	51	PR	22.3	1372	BC	10.6	1372	BC	3.7	281	DC	3.8	161	PR	20.2	1372	BC	5.8	224	PR	30.9	1372	BC	53.5	1372	BC	0.1	7	DC	33.8	1372	BC	37.6	1372	BC
1.4	52	PR	22.3	1373	BC	10.6	1373	BC	3.7	282	DC	3.8	162	PR	20.3	1373	BC	5.9	225	PR	31	1373	BC	54.2	1373	BC	0.1	8	DC	33.8	1373	BC	37.6	1373	BC
1.4	53	PR	22.4	1374	BC	10.6	1374	BC	3.8	283	DC	3.8	163	PR	20.4	1374	BC	5.9	226	PR	31.1	1374	BC	54.6	1374	BC	0.2	9	DC	33.8	1374	BC	37.7	1374	BC
1.4	54	PR	22.4	1375	BC	10.7	1375	BC	3.9	284	DC	3.9	164	PR	20.5	1375	BC	5.9	227	PR	31.1	1375	BC	54.8	1375	BC	0.2	10	DC	33.9	1375	BC	37.8	1375	BC
1.5	55	PR	22.4	1376	BC	10.7	1376	BC	4	285	DC	3.9	165	PR	20.6	1376	BC	5.9	228	PR	31.4	1376	BC	55	1376	BC	0.2	11	DC	33.9	1376	BC	38	1376	BC
1.5	56	PR	22.4	1377	BC	10.7	1377	BC	4.1	286	DC	3.9	166	PR	20.6	1377	BC	6	229	PR	31.5	1377	BC	100	1377	BC	0.2	12	DC	33.9	1377	BC	38.2	1377	BC
1.5	57	PR	22.4	1378	BC	10.8	1378	BC	4.2	287	DC	3.9	167	PR	20.7	1378	BC	6	230	PR	31.6	1378	BC	0	1	DC	0.2	13	DC	33.9	1378	BC	38.3	1378	BC
1.5	58	PR	22.5	1379	BC	10.8	1379	BC	4.3	288	DC	4	168	PR	20.9	1379	BC	6	231	PR	31.7	1379	BC	0	2	DC	0.2	14	DC	34	1379	BC	38.5	1379	BC
1.6	59	PR	22.5	1380	BC	10.9	1380	BC	4.4	289	DC	4	169	PR	20.9	1380	BC	6	232	PR	31.7	1380	BC	0	3	DC	0.3	15	DC	34	1380	BC	38.6	1380	BC
1.6	60	PR	22.6	1381	BC	10.9	1381	BC	4.4	290	DC	4	170	PR	21	1381	BC	6.1	233	PR	31.8	1381	BC	0	4	DC	0.3	16	DC	34.1	1381	BC	38.8	1381	BC
1.6	61	PR	22.6	1382	BC	10.9	1382	BC	4.6	291	DC	4	171	PR	21.1	1382	BC	6.2	234	PR	31.9	1382	BC	0	5	DC	0.3	17	DC	34.1	1382	BC	38.9	1382	BC
1.7	62	PR	22.6	1383	BC	10.9	1383	BC	4.7	292	DC	4	172	PR	21.2	1383	BC	6.2	235	PR	32	1383	BC	0	6	DC	0.3	18	DC	34.1	1383	BC	39	1383	BC
1.7	63	PR	22.7	1384	BC	10.9	1384	BC	4.8	293	DC	4.1	173	PR	21.3	1384	BC	6.2	236	PR	32.1	1384	BC	0	7	DC	0.3	19	DC	34.1	1384	BC	39.1	1384	BC
1.8	64	PR	22.7	1385	BC	11	1385	BC	5	294	DC	4.1	174	PR	21.4	1385	BC	6.2	237	PR	32.2	1385	BC	0	8	DC	0.4	20	DC	34.2	1385	BC	39.2	1385	BC
1.8	65	PR	22.7	1386	BC	11	1386	BC	5.1	295	DC	4.1	175	PR	21.5	1386	BC	6.2	238	PR	32.3	1386	BC	0	9	DC	0.4	21	DC	34.2	1386	BC	39.4	1386	BC
1.8	66	PR	22.7	1387	BC	11	1387	BC	5.2	296	DC	4.1	176	PR	21.7	1387	BC	6.3	239	PR	32.4	1387	BC	0	10	DC	0.4	22	DC	34.2	1387	BC	39.5	1387	BC
1.8	67	PR	22.7	1388	BC	11	1388	BC	5.4	297	DC	4.2	177	PR	21.8	1388	BC	6.3	240	PR	32.5	1388	BC	0	11	DC	0.4	23	DC	34.3	1388	BC	39.7	1388	BC
1.9	68	PR	22.7	1389	BC	11.1	1389	BC	5.5	298	DC	4.2	178	PR	21.9	1389	BC	6.4	241	PR	32.5	1389	BC	0.1	12	DC	0.4	24	DC	34.3	1389	BC	39.8	1389	BC
1.9	69	PR	22.8	1390	BC	11.1	1390	BC	5.7	299	DC	4.2	179	PR	22.1	1390	BC	6.4	242	PR	32.7	1390	BC	0.1	13	DC	0.4	25	DC	34.3	1390	BC	40	1390	BC
1.9	70	PR	22.8	1391	BC	11.1	1391	BC	5.8	300	DC	4.2	180	PR	22.1	1391	BC	6.4	243	PR	32.8	1391	BC	0.1	14	DC	0.5	26	DC	34.4	1391	BC	40.1	1391	BC
1.9	71	PR	22.8	1392	BC	11.2	1392	BC	6	301	DC	4.3	181	PR	22.3	1392	BC	6.5	244	PR	32.9	1392	BC	0.1	15	DC	0.5	27	DC	34.4	1392	BC	40.2	1392	BC
2	72	PR	22.8	1393	BC	11.2	1393	BC	6.2	302	DC	4.3	182	PR	22.4	1393	BC	6.5	245	PR	33	1393	BC	0.1	16	DC	0.5	28	DC	34.5	1393	BC	40.4	1393	BC
2	73	PR	22.8	1394	BC	11.2	1394	BC	6.4	303	DC	4.3	183	PR	22.6	1394	BC	6.5	246	PR	33.1	1394	BC	0.1	17	DC	0.5	29	DC	34.5	1394	BC	40.5	1394	BC
2	74	PR	22.9	1395	BC	11.3	1395	BC	6.6	304	DC	4.4	184	PR	22.7	1395	BC	6.6	247	PR	33.3	1395	BC	0.1	18	DC	0.5	30	DC	34.5	1395	BC	40.7	1395	BC
2.1	75	PR	22.9	1396	BC	11.3	1396	BC	6.8	305	DC	4.4	185	PR	22.8	1396	BC	6.6	248	PR	33.4	1396	BC	0.2	19	DC	0.5	31	DC	34.5	1396	BC	40.9	1396	BC
2.1	76	PR	22.9	1397	BC	11.3	1397	BC	7.1	306	DC	4.4	186	PR	22.8	1397	BC	6.7	249	PR	33.6	1397	BC	0.2	20	DC	0.6	32	DC	34.6	1397	BC	41	1397	BC
2.1	77	PR	22.9	1398	BC	11.4	1398	BC	7.3	307	DC	4.4	187	PR	23	1398	BC	6.7	250	PR	33.7	1398	BC	0.2	21	DC	0.6	33	DC	34.6	1398	BC	41.2	1398	BC
2.2	78	PR	22.9	1399	BC	11.4	1399	BC	7.6	308	DC	4.5	188	PR	23	1399	BC	6.7	251	PR	33.9	1399	BC	0.3	22	DC	0.6	34	DC	34.6	1399	BC	41.3	1399	BC
2.2	79	PR	22.9	1400	BC	11.4	1400	BC	7.8	309	DC	4.5	189	PR	23.2	1400	BC	6.8	252	PR	34	1400	BC	0.4	23	DC	0.6	35	DC	34.6	1400	BC	41.5	1400	BC
2.2	80	PR	23	1401	BC	11.5	1401	BC	8.1	310	DC	4.5	190	PR	23.3	1401	BC	6.9	253	PR	34.2	1401	BC	0.5	24	DC	0.7	36	DC	34.7	1401	BC	41.7	1401	BC
2.2	81	PR	23	1402	BC	11.5	1402	BC	8.4	311	DC	4.5	191	PR	23.4	1402	BC	6.9	254	PR	34.3	1402	BC	0.7	25	DC	0.7	37	DC	34.7	1402	BC	41.8	1402	BC
2.3	82	PR	23	1403	BC	11.5	1403	BC	8.8	312	DC	4.6	192	PR	23.6	1403	BC	7	255	PR	34.5	1403	BC	0.8	26	DC	0.7	38	DC	34.7	1403	BC	42	1403	BC
2.3	83	PR	23	1404	BC	11.5	1404	BC	9.1	313	DC	4.6	193	PR	23.7	1404	BC	7	256	PR	34.7	1404	BC	1.1	27	DC	0.8	39	DC	34.8	1404	BC	42.1	1404	BC
2.4	84	PR	23.1	1405	BC	11.6	1405	BC	9.4	314	DC	4.6	194	PR	23.8	1405	BC	7.1	257	PR	34.9	1405	BC	1.4	28	DC	0.8	40	DC	34.8	1405	BC	42.4	1405	BC
2.4	85	PR	23.1	1406	BC	11.6	1406	BC	9.9	315	DC	4.6	195	PR	24	1406	BC	7.1	258	PR	35.1	1406	BC	1.6	29	DC	0.8	41	DC	34.9	1406	BC	42.6	1406	BC
2.4	86	PR	23.2	1407	BC	11.7	1407	BC	10.3	316	DC	4.7	196	PR	24.1	1407	BC	7.1	259	PR	35.2	1407	BC	2	30	DC	0.8	42	DC	34.9	1407	BC	42.7	1407	BC
2.5	87	PR	23.2	1408	BC	11.7	1408	BC	10.9	317	DC	4.7	197	PR	24.2	1408	BC	7.2	260	PR	35.4	1408	BC	2.3	31	DC	0.8	43	DC	34.9	1408	BC	42.9	1408	BC
2.5	88	PR	23.2	1409	BC	11.7	1409	BC	11.5	318	DC	4.7	198	PR	24.4	1409	BC	7.2	261	PR	35.6	1409	BC	2.7	32	DC	0.9	44	DC	35	1409	BC	43	1409	BC
2.5	89	PR	23.2	1410	BC	11.7	1410	BC	12.2	319	DC	4.7	199	PR	24.6	1410	BC	7.2	262	PR	35.8	1410	BC	3.3	33	DC	0.9	45	DC	35	1410	BC	43.2	1410	BC
2.5	90	PR	23.3	1411	BC	11.8	1411	BC	12.8	320	DC	4.8	200	PR	24.7	1411	BC	7.3	263	PR	35.9	1411	BC	3.9	34	DC	0.9	46	DC	35.1	1411	BC	43.4	1411	BC
2.5	91	PR	23.3	1412	BC	11.8	1412	BC	13.6	321	DC	4.8	201	PR	24.9	1412	BC	7.4	264	PR	36.2	1412	BC	4.9	35	DC	0.9	47	DC	35.1	1412	BC	43.5	1412	BC
2.6	92	PR	23.3	1413	BC	11.9	1413	BC	14.6	322	DC	4.8	202	PR	25	1413	BC	7.4	265	PR	36.4	1413	BC	6.3	36	DC	1	48	DC	35.1	1413	BC	43.8	1413	BC
2.6	93	PR	23.4	1414	BC	11.9	1414	BC	15.8	323	DC	4.8	203	PR	25.2	1414	BC	7.5	266	PR	36.5	1414	BC	8.3	37	DC	1	49	DC	35.2	1414	BC	44	1414	BC
2.6	94	PR	23.4	1415	BC	11.9	1415	BC	17.1	324	DC	4.9	204	PR	25.3	1415	BC	7.5	267	PR	36.8	1415	BC	11.3	38	DC	1	50	DC	35.2	1415	BC	44.2	1415	BC
2.6	95	PR	23.4	1416	BC	12	1416	BC	18.9	325	DC	4.9	205	PR	25.5	1416	BC	7.5	268	PR	37	1416	BC	15.7	39	DC	1.1	51	DC	35.3	1416	BC	44.3	1416	BC
2.7	96	PR	23.4	1417	BC	12	1417	BC	20.8	326	DC	4.9	206	PR	25.7	1417	BC	7.6	269	PR	37.2	1417	BC	22.3	40	DC	1.1	52	DC	35.3	1417	BC	44.5	1417	BC
2.7	97	PR	23.4	1418	BC	12	1418	BC	23.2	327	DC	4.9	207	PR	25.9	1418	BC	7.6	270	PR	37.5	1418	BC	24.2	41	DC	1.2	53	DC	35.3	1418	BC	44.7	1418	BC
2.8	98	PR	23.5	1419	BC	12.1	1419	BC	26.4	328	DC	5	208	PR	26.1	1419	BC	7.6	271	PR	37.7	1419	BC	24.9	42	DC	1.2	54	DC	35.5	1419	BC	44.9	1419	BC
2.8	99	PR	23.5	1420	BC	12.1	1420	BC	32.1	329	DC	5	209	PR	26.3	1420	BC	7.7	272	PR	38	1420	BC	25.6	43	DC	1.2	55	DC	37.9	1420	BC	45.1	1420	BC
2.8	100	PR	23.5	1421	BC	12.1	1421	BC	38.5	330	DC	5	210	PR	26.6	1421	BC	7.8	273	PR	38.3	1421	BC	26.6	44	DC	1.2	56	DC	38	1421	BC	45.3	1421	BC
2.8	101	PR	23.6	1422	BC	12.2	1422	BC	47.8	331	DC	5	211	PR	26.9	1422	BC	7.8	274	PR	38.5	1422	BC	28.2	45	DC	1.3	57	DC	38.2	1422	BC	45.6	1422	BC
2.9	102	PR	23.6	1423	BC	12.2	1423	BC	61.6	332	DC	5.1	212	PR	28.5	1423	BC	7.8	275	PR	38.8	1423	BC	30.6	46	DC	1.3	58	DC	38.3	1423	BC	45.9	1423	BC
2.9	103	PR	23.6	1424	BC	12.3	1424	BC	71.9	333	DC	5.1	213	PR	28.7	1424	BC	8	276	PR	39.2	1424	BC	34.3	47	DC	1.3	59	DC	38.4	1424	BC	46.1	1424	BC
2.9	104	PR	23.7	1425	BC	12.3	1425	BC	100	334	DC	5.1	214	PR	28.8	1425	BC	8	277	PR	39.5	1425	BC	41	48	DC	1.4	60	DC	38.4	1425	BC	46.3	1425	BC
3	105	PR	23.7	1426	BC	12.3	1426	BC	0.8	1	KS	5.1	215	PR	28.9	1426	BC	8	278	PR	40	1426	BC	55.2	49	DC	1.4	61	DC	38.4	1426	BC	46.6	1426	BC
3	106	PR	23.7	1427	BC	12.4	1427	BC	1	2	KS	5.2	216	PR	29	1427	BC	8.1	279	PR	40.4	1427	BC	100	50	DC	1.5	62	DC	38.4	1427	BC	46.9	1427	BC
3	107	PR	23.7	1428	BC	12.4	1428	BC	1.1	3	KS	5.2	217	PR	29.2	1428	BC	8.1	280	PR	40.9	1428	BC	0	1	KS	1.5	63	DC	38.5	1428	BC	47	1428	BC
3.1	108	PR	23.8	1429	BC	12.5	1429	BC	1.4	4	KS	5.2	218	PR	29.3	1429	BC	8.1	281	PR	41.3	1429	BC	4	2	KS	1.6	64	DC	38.5	1429	BC	47.3	1429	BC
3.1	109	PR	23.8	1430	BC	12.5	1430	BC	1.5	5	KS	5.2	219	PR	29.4	1430	BC	8.2	282	PR	41.8	1430	BC	26.7	3	KS	1.6	65	DC	38.5	1430	BC	47.6	1430	BC
3.1	110	PR	23.8	1431	BC	12.5	1431	BC	1.8	6	KS	5.3	220	PR	29.5	1431	BC	8.2	283	PR	42.3	1431	BC	33	4	KS	1.6	66	DC	38.5	1431	BC	47.8	1431	BC
3.1	111	PR	23.8	1432	BC	12.6	1432	BC	1.9	7	KS	5.3	221	PR	29.7	1432	BC	8.2	284	PR	42.9	1432	BC	40.5	5	KS	1.7	67	DC	38.5	1432	BC	48.1	1432	BC
3.2	112	PR	23.9	1433	BC	12.6	1433	BC	2.1	8	KS	5.4	222	PR	29.8	1433	BC	8.3	285	PR	43.3	1433	BC	55.1	6	KS	1.8	68	DC	38.6	1433	BC	48.5	1433	BC
3.2	113	PR	23.9	1434	BC	12.7	1434	BC	2.3	9	KS	5.4	223	PR	30	1434	BC	8.3	286	PR	43.8	1434	BC	100	7	KS	1.8	69	DC	38.6	1434	BC	48.7	1434	BC
3.2	114	PR	23.9	1435	BC	12.7	1435	BC	2.8	10	KS	5.4	224	PR	30.1	1435	BC	8.3	287	PR	44.3	1435	BC	0	1	PR	1.9	70	DC	38.6	1435	BC	49.1	1435	BC
3.2	115	PR	23.9	1436	BC	12.7	1436	BC	2.9	11	KS	5.4	225	PR	30.3	1436	BC	8.3	288	PR	44.9	1436	BC	0	2	PR	1.9	71	DC	38.7	1436	BC	49.5	1436	BC
3.3	116	PR	23.9	1437	BC	12.8	1437	BC	3.2	12	KS	5.5	226	PR	30.4	1437	BC	8.4	289	PR	45.3	1437	BC	0	3	PR	2	72	DC	38.7	1437	BC	49.8	1437	BC
3.3	117	PR	24	1438	BC	12.8	1438	BC	3.5	13	KS	5.5	227	PR	30.6	1438	BC	8.4	290	PR	45.9	1438	BC	0	4	PR	2.1	73	DC	38.8	1438	BC	50.1	1438	BC
3.3	118	PR	24	1439	BC	12.8	1439	BC	3.8	14	KS	5.5	228	PR	30.8	1439	BC	8.5	291	PR	46.4	1439	BC	0	5	PR	2.2	74	DC	38.8	1439	BC	50.5	1439	BC
3.4	119	PR	24	1440	BC	12.9	1440	BC	4.1	15	KS	5.6	229	PR	30.9	1440	BC	8.6	292	PR	47.4	1440	BC	0	6	PR	2.2	75	DC	38.8	1440	BC	50.9	1440	BC
3.4	120	PR	24	1441	BC	12.9	1441	BC	4.4	16	KS	5.6	230	PR	31.1	1441	BC	8.6	293	PR	48.4	1441	BC	0	7	PR	2.3	76	DC	38.8	1441	BC	51.3	1441	BC
3.4	121	PR	24.1	1442	BC	12.9	1442	BC	4.6	17	KS	5.6	231	PR	31.3	1442	BC	8.6	294	PR	49.7	1442	BC	0	8	PR	2.3	77	DC	38.9	1442	BC	51.7	1442	BC
3.5	122	PR	24.1	1443	BC	13	1443	BC	4.9	18	KS	5.6	232	PR	31.4	1443	BC	8.7	295	PR	51.5	1443	BC	0	9	PR	2.4	78	DC	38.9	1443	BC	52.1	1443	BC
3.5	123	PR	24.1	1444	BC	13	1444	BC	5.1	19	KS	5.6	233	PR	31.5	1444	BC	8.7	296	PR	53.5	1444	BC	0	10	PR	2.5	79	DC	38.9	1444	BC	52.5	1444	BC
3.5	124	PR	24.1	1445	BC	13	1445	BC	5.4	20	KS	5.7	234	PR	31.6	1445	BC	8.7	297	PR	55.4	1445	BC	0	11	PR	2.6	80	DC	39	1445	BC	52.9	1445	BC
3.5	125	PR	24.2	1446	BC	13.2	1446	BC	5.8	21	KS	5.7	235	PR	31.8	1446	BC	8.8	298	PR	56.8	1446	BC	0	12	PR	2.7	81	DC	39	1446	BC	53.3	1446	BC
3.6	126	PR	24.2	1447	BC	13.2	1447	BC	6.1	22	KS	5.7	236	PR	32	1447	BC	8.8	299	PR	57.6	1447	BC	0	13	PR	2.7	82	DC	39	1447	BC	53.8	1447	BC
3.6	127	PR	24.3	1448	BC	13.2	1448	BC	6.4	23	KS	5.7	237	PR	32.1	1448	BC	8.9	300	PR	58.1	1448	BC	0	14	PR	2.8	83	DC	39.1	1448	BC	54.2	1448	BC
3.6	128	PR	24.3	1449	BC	13.3	1449	BC	6.8	24	KS	5.7	238	PR	32.3	1449	BC	8.9	301	PR	58.4	1449	BC	0	15	PR	3	84	DC	39.1	1449	BC	54.8	1449	BC
3.7	129	PR	24.3	1450	BC	13.3	1450	BC	7.2	25	KS	5.8	239	PR	32.5	1450	BC	9	302	PR	58.5	1450	BC	0	16	PR	3.1	85	DC	39.2	1450	BC	55.4	1450	BC
3.7	130	PR	24.3	1451	BC	13.3	1451	BC	7.6	26	KS	5.8	240	PR	32.6	1451	BC	9.1	303	PR	100	1451	BC	0.1	17	PR	3.2	86	DC	39.2	1451	BC	56.1	1451	BC
3.7	131	PR	24.3	1452	BC	13.4	1452	BC	8	27	KS	5.9	241	PR	32.8	1452	BC	9.1	304	PR	0	1	DC	0.1	18	PR	3.2	87	DC	39.2	1452	BC	56.7	1452	BC
3.7	132	PR	24.4	1453	BC	13.4	1453	BC	8.5	28	KS	5.9	242	PR	33	1453	BC	9.2	305	PR	0	2	DC	0.1	19	PR	3.5	88	DC	39.3	1453	BC	57.3	1453	BC
3.8	133	PR	24.4	1454	BC	13.4	1454	BC	9.1	29	KS	5.9	243	PR	33.2	1454	BC	9.2	306	PR	0	3	DC	0.1	20	PR	3.6	89	DC	39.3	1454	BC	57.9	1454	BC
3.8	134	PR	24.4	1455	BC	13.5	1455	BC	9.8	30	KS	5.9	244	PR	33.4	1455	BC	9.3	307	PR	0	4	DC	0.1	21	PR	3.8	90	DC	39.3	1455	BC	58.6	1455	BC
3.9	135	PR	24.4	1456	BC	13.5	1456	BC	10.5	31	KS	6	245	PR	33.6	1456	BC	9.4	308	PR	0	5	DC	0.1	22	PR	3.9	91	DC	39.3	1456	BC	59.4	1456	BC
3.9	136	PR	24.5	1457	BC	13.5	1457	BC	11.3	32	KS	6	246	PR	33.8	1457	BC	9.4	309	PR	0	6	DC	0.1	23	PR	4	92	DC	39.3	1457	BC	60.4	1457	BC
3.9	137	PR	24.5	1458	BC	13.6	1458	BC	12.2	33	KS	6	247	PR	34	1458	BC	9.4	310	PR	0	7	DC	0.1	24	PR	4.2	93	DC	39.4	1458	BC	61.5	1458	BC
4	138	PR	24.5	1459	BC	13.6	1459	BC	13.4	34	KS	6.1	248	PR	34.2	1459	BC	9.4	311	PR	0	8	DC	0.1	25	PR	4.4	94	DC	39.4	1459	BC	62.8	1459	BC
4	139	PR	24.5	1460	BC	13.7	1460	BC	15.1	35	KS	6.1	249	PR	34.4	1460	BC	9.5	312	PR	0	9	DC	0.1	26	PR	4.6	95	DC	39.4	1460	BC	64.1	1460	BC
4.1	140	PR	24.6	1461	BC	13.7	1461	BC	17.5	36	KS	6.1	250	PR	34.6	1461	BC	9.5	313	PR	0	10	DC	0.1	27	PR	4.8	96	DC	39.4	1461	BC	65.5	1461	BC
4.1	141	PR	24.6	1462	BC	13.7	1462	BC	20.9	37	KS	6.2	251	PR	34.9	1462	BC	9.5	314	PR	0.1	11	DC	0.1	28	PR	5.1	97	DC	39.5	1462	BC	67.6	1462	BC
4.1	142	PR	24.6	1463	BC	13.8	1463	BC	27.4	38	KS	6.2	252	PR	35.1	1463	BC	9.6	315	PR	0.1	12	DC	0.1	29	PR	5.2	98	DC	39.5	1463	BC	70.1	1463	BC
4.2	143	PR	24.7	1464	BC	13.8	1464	BC	34.3	39	KS	6.2	253	PR	35.3	1464	BC	9.6	316	PR	0.1	13	DC	0.1	30	PR	5.5	99	DC	39.6	1464	BC	73.6	1464	BC
4.2	144	PR	24.7	1465	BC	13.9	1465	BC	44.7	40	KS	6.3	254	PR	35.5	1465	BC	9.7	317	PR	0.1	14	DC	0.1	31	PR	5.8	100	DC	39.6	1465	BC	100	1465	BC
4.2	145	PR	24.7	1466	BC	13.9	1466	BC	60.6	41	KS	6.3	255	PR	35.7	1466	BC	9.8	318	PR	0.1	15	DC	0.1	32	PR	6.1	101	DC	39.6	1466	BC	0	1	DC
4.2	146	PR	24.7	1467	BC	14	1467	BC	71.7	42	KS	6.3	256	PR	36	1467	BC	9.8	319	PR	0.1	16	DC	0.1	33	PR	6.4	102	DC	39.7	1467	BC	0	2	DC
4.3	147	PR	24.8	1468	BC	14	1468	BC	100	43	KS	6.3	257	PR	36.2	1468	BC	9.9	320	PR	0.1	17	DC	0.1	34	PR	6.6	103	DC	39.7	1468	BC	0	3	DC
4.3	148	PR	24.8	1469	BC	14.1	1469	BC	0	1	PR	6.4	258	PR	36.4	1469	BC	9.9	321	PR	0.1	18	DC	0.1	35	PR	7.1	104	DC	39.8	1469	BC	0	4	DC
4.3	149	PR	24.8	1470	BC	14.1	1470	BC	0	2	PR	6.4	259	PR	36.7	1470	BC	10	322	PR	0.1	19	DC	0.1	36	PR	7.5	105	DC	39.8	1470	BC	0	5	DC
4.4	150	PR	24.8	1471	BC	14.1	1471	BC	0	3	PR	6.4	260	PR	37	1471	BC	10	323	PR	0.1	20	DC	0.1	37	PR	7.8	106	DC	39.8	1471	BC	0.1	6	DC
4.4	151	PR	24.8	1472	BC	14.2	1472	BC	0	4	PR	6.5	261	PR	37.2	1472	BC	10	324	PR	0.1	21	DC	0.1	38	PR	8.3	107	DC	39.8	1472	BC	0.1	7	DC
4.5	152	PR	24.8	1473	BC	14.2	1473	BC	0	5	PR	6.5	262	PR	37.5	1473	BC	10	325	PR	0.1	22	DC	0.1	39	PR	8.7	108	DC	39.9	1473	BC	0.1	8	DC
4.6	153	PR	26	1474	BC	14.3	1474	BC	0	6	PR	6.6	263	PR	37.8	1474	BC	10.1	326	PR	0.1	23	DC	0.1	40	PR	9.2	109	DC	39.9	1474	BC	0.1	9	DC
4.6	154	PR	26	1475	BC	14.3	1475	BC	0	7	PR	6.6	264	PR	38.1	1475	BC	10.2	327	PR	0.2	24	DC	0.1	41	PR	9.7	110	DC	39.9	1475	BC	0.1	10	DC
4.6	155	PR	26	1476	BC	14.4	1476	BC	0	8	PR	6.6	265	PR	38.3	1476	BC	10.2	328	PR	0.2	25	DC	0.2	42	PR	10.3	111	DC	39.9	1476	BC	0.1	11	DC
4.7	156	PR	26	1477	BC	14.4	1477	BC	0	9	PR	6.6	266	PR	38.6	1477	BC	10.2	329	PR	0.3	26	DC	0.2	43	PR	10.8	112	DC	40	1477	BC	0.1	12	DC
4.7	157	PR	26.1	1478	BC	14.4	1478	BC	0	10	PR	6.7	267	PR	38.9	1478	BC	10.3	330	PR	0.3	27	DC	0.2	44	PR	11.5	113	DC	40	1478	BC	0.1	13	DC
4.8	158	PR	26.1	1479	BC	14.5	1479	BC	0	11	PR	6.7	268	PR	39.2	1479	BC	10.3	331	PR	0.4	28	DC	0.2	45	PR	12	114	DC	40	1479	BC	0.1	14	DC
4.8	159	PR	26.2	1480	BC	14.5	1480	BC	0	12	PR	6.8	269	PR	39.5	1480	BC	10.4	332	PR	0.5	29	DC	0.2	46	PR	12.5	115	DC	40.1	1480	BC	0.1	15	DC
4.8	160	PR	26.2	1481	BC	14.6	1481	BC	0	13	PR	6.8	270	PR	39.9	1481	BC	10.4	333	PR	0.6	30	DC	0.2	47	PR	13.2	116	DC	40.1	1481	BC	0.1	16	DC
4.8	161	PR	26.2	1482	BC	14.7	1482	BC	0	14	PR	6.8	271	PR	40.2	1482	BC	10.4	334	PR	0.7	31	DC	0.2	48	PR	14	117	DC	40.1	1482	BC	0.1	17	DC
4.9	162	PR	26.2	1483	BC	14.7	1483	BC	0	15	PR	6.9	272	PR	40.6	1483	BC	10.5	335	PR	0.9	32	DC	0.2	49	PR	14.8	118	DC	40.2	1483	BC	0.2	18	DC
4.9	163	PR	26.3	1484	BC	14.7	1484	BC	0	16	PR	6.9	273	PR	41	1484	BC	10.5	336	PR	1.4	33	DC	0.2	50	PR	15.6	119	DC	40.2	1484	BC	0.2	19	DC
5	164	PR	26.3	1485	BC	14.8	1485	BC	0.1	17	PR	6.9	274	PR	41.4	1485	BC	10.5	337	PR	1.9	34	DC	0.2	51	PR	16.6	120	DC	40.3	1485	BC	0.2	20	DC
5	165	PR	26.3	1486	BC	14.8	1486	BC	0.1	18	PR	7	275	PR	41.8	1486	BC	10.6	338	PR	2.7	35	DC	0.2	52	PR	17.5	121	DC	40.3	1486	BC	0.2	21	DC
5.1	166	PR	26.3	1487	BC	14.9	1487	BC	0.1	19	PR	7	276	PR	42.2	1487	BC	10.6	339	PR	3.7	36	DC	0.2	53	PR	18.5	122	DC	40.3	1487	BC	0.2	22	DC
5.1	167	PR	26.3	1488	BC	14.9	1488	BC	0.1	20	PR	7	277	PR	42.7	1488	BC	10.6	340	PR	5	37	DC	0.2	54	PR	19.6	123	DC	40.4	1488	BC	0.2	23	DC
5.1	168	PR	26.4	1489	BC	15	1489	BC	0.1	21	PR	7.1	278	PR	43.1	1489	BC	10.7	341	PR	7	38	DC	0.2	55	PR	20.9	124	DC	40.4	1489	BC	0.2	24	DC
5.1	169	PR	26.4	1490	BC	15	1490	BC	0.1	22	PR	7.1	279	PR	43.6	1490	BC	10.7	342	PR	9.5	39	DC	0.3	56	PR	22.1	125	DC	40.4	1490	BC	0.2	25	DC
5.2	170	PR	26.4	1491	BC	15.1	1491	BC	0.1	23	PR	7.1	280	PR	44.1	1491	BC	10.8	343	PR	12.7	40	DC	0.3	57	PR	23.5	126	DC	40.4	1491	BC	0.2	26	DC
5.2	171	PR	26.4	1492	BC	15.1	1492	BC	0.1	24	PR	7.1	281	PR	44.6	1492	BC	10.9	344	PR	17	41	DC	0.3	58	PR	25	127	DC	40.4	1492	BC	0.2	27	DC
5.2	172	PR	26.5	1493	BC	15.2	1493	BC	0.1	25	PR	7.1	282	PR	45	1493	BC	10.9	345	PR	22.6	42	DC	0.3	59	PR	26.9	128	DC	40.5	1493	BC	0.3	28	DC
5.3	173	PR	26.5	1494	BC	15.2	1494	BC	0.1	26	PR	7.2	283	PR	45.6	1494	BC	11	346	PR	24.6	43	DC	0.3	60	PR	28.6	129	DC	40.5	1494	BC	0.3	29	DC
5.3	174	PR	26.5	1495	BC	15.3	1495	BC	0.1	27	PR	7.3	284	PR	46.1	1495	BC	11	347	PR	25.2	44	DC	0.3	61	PR	30.2	130	DC	40.5	1495	BC	0.3	30	DC
5.3	175	PR	26.5	1496	BC	15.3	1496	BC	0.1	28	PR	7.3	285	PR	46.7	1496	BC	11.1	348	PR	26.1	45	DC	0.4	62	PR	31.9	131	DC	40.5	1496	BC	0.3	31	DC
5.4	176	PR	26.6	1497	BC	15.4	1497	BC	0.1	29	PR	7.3	286	PR	47.5	1497	BC	11.2	349	PR	27.3	46	DC	0.4	63	PR	34.3	132	DC	40.5	1497	BC	0.3	32	DC
5.4	177	PR	26.7	1498	BC	15.4	1498	BC	0.1	30	PR	7.3	287	PR	48.1	1498	BC	11.2	350	PR	29	47	DC	0.4	64	PR	36.5	133	DC	40.6	1498	BC	0.3	33	DC
5.5	178	PR	26.7	1499	BC	15.5	1499	BC	0.1	31	PR	7.4	288	PR	48.8	1499	BC	11.3	351	PR	31.8	48	DC	0.4	65	PR	38.8	134	DC	40.6	1499	BC	0.3	34	DC
5.5	179	PR	26.8	1500	BC	15.5	1500	BC	0.1	32	PR	7.4	289	PR	49.5	1500	BC	11.4	352	PR	36.2	49	DC	0.4	66	PR	41.6	135	DC	40.6	1500	BC	0.3	35	DC
5.5	180	PR	26.8	1501	BC	15.6	1501	BC	0.1	33	PR	7.4	290	PR	50.3	1501	BC	11.5	353	PR	43.9	50	DC	0.5	67	PR	44.7	136	DC	40.6	1501	BC	0.4	36	DC
5.5	181	PR	26.8	1502	BC	15.6	1502	BC	0.1	34	PR	7.4	291	PR	51.1	1502	BC	11.5	354	PR	58.7	51	DC	0.5	68	PR	48.7	137	DC	40.7	1502	BC	0.4	37	DC
5.6	182	PR	26.8	1503	BC	15.7	1503	BC	0.1	35	PR	7.5	292	PR	52	1503	BC	11.5	355	PR	100	52	DC	0.5	69	PR	53.3	138	DC	40.7	1503	BC	0.4	38	DC
5.6	183	PR	26.9	1504	BC	15.8	1504	BC	0.1	36	PR	7.5	293	PR	53.1	1504	BC	11.6	356	PR	28.2	1	KS	0.5	70	PR	58	139	DC	40.7	1504	BC	0.4	39	DC
5.6	184	PR	26.9	1505	BC	15.9	1505	BC	0.1	37	PR	7.6	294	PR	54.2	1505	BC	11.7	357	PR	35	2	KS	0.6	71	PR	64	140	DC	40.7	1505	BC	0.4	40	DC
5.7	185	PR	26.9	1506	BC	15.9	1506	BC	0.1	38	PR	7.6	295	PR	55.4	1506	BC	11.7	358	PR	43.3	3	KS	0.6	72	PR	71.2	141	DC	40.8	1506	BC	0.4	41	DC
5.7	186	PR	26.9	1507	BC	16	1507	BC	0.1	39	PR	7.7	296	PR	57	1507	BC	11.8	359	PR	58.6	4	KS	0.7	73	PR	79.5	142	DC	40.8	1507	BC	0.4	42	DC
5.7	187	PR	27	1508	BC	16	1508	BC	0.1	40	PR	7.7	297	PR	58.8	1508	BC	11.9	360	PR	100	5	KS	0.7	74	PR	89.8	143	DC	40.9	1508	BC	0.5	43	DC
5.7	188	PR	27	1509	BC	16.1	1509	BC	0.1	41	PR	7.7	298	PR	61.2	1509	BC	11.9	361	PR	0	1	PR	0.7	75	PR	100	144	DC	40.9	1509	BC	0.5	44	DC
5.8	189	PR	27	1510	BC	16.1	1510	BC	0.1	42	PR	7.8	299	PR	64.4	1510	BC	12	362	PR	0	2	PR	0.8	76	PR	1.2	1	KS	40.9	1510	BC	0.5	45	DC
5.8	190	PR	27.1	1511	BC	16.2	1511	BC	0.1	43	PR	7.9	300	PR	69.7	1511	BC	12	363	PR	0	3	PR	0.8	77	PR	2.2	2	KS	40.9	1511	BC	0.5	46	DC
5.8	191	PR	27.1	1512	BC	16.3	1512	BC	0.1	44	PR	8	301	PR	100	1512	BC	12.1	364	PR	0	4	PR	0.9	78	PR	2.3	3	KS	41	1512	BC	0.5	47	DC
5.8	192	PR	27.1	1513	BC	16.3	1513	BC	0.1	45	PR	8	302	PR	0	1	DC	12.1	365	PR	0	5	PR	0.9	79	PR	2.5	4	KS	41	1513	BC	0.5	48	DC
5.9	193	PR	27.1	1514	BC	16.4	1514	BC	0.1	46	PR	8	303	PR	0	2	DC	12.2	366	PR	0	6	PR	1	80	PR	2.6	5	KS	41	1514	BC	0.5	49	DC
6.1	194	PR	27.1	1515	BC	16.5	1515	BC	0.1	47	PR	8.2	304	PR	0	3	DC	12.3	367	PR	0	7	PR	1.1	81	PR	2.8	6	KS	41.1	1515	BC	0.6	50	DC
6.1	195	PR	27.2	1516	BC	16.6	1516	BC	0.1	48	PR	8.2	305	PR	0	4	DC	12.4	368	PR	0	8	PR	1.1	82	PR	3.1	7	KS	41.1	1516	BC	0.6	51	DC
6.2	196	PR	27.2	1517	BC	16.8	1517	BC	0.1	49	PR	8.2	306	PR	0	5	DC	12.4	369	PR	0	9	PR	1.2	83	PR	4.2	8	KS	41.1	1517	BC	0.6	52	DC
6.3	197	PR	27.2	1518	BC	16.8	1518	BC	0.2	50	PR	8.3	307	PR	0	6	DC	12.5	370	PR	0	10	PR	1.3	84	PR	5.3	9	KS	41.2	1518	BC	0.6	53	DC
6.3	198	PR	27.2	1519	BC	16.9	1519	BC	0.2	51	PR	8.3	308	PR	0	7	DC	12.6	371	PR	0	11	PR	1.3	85	PR	6.3	10	KS	41.2	1519	BC	0.6	54	DC
6.3	199	PR	27.3	1520	BC	17	1520	BC	0.2	52	PR	8.4	309	PR	0	8	DC	12.7	372	PR	0	12	PR	1.4	86	PR	8.9	11	KS	41.2	1520	BC	0.6	55	DC
6.4	200	PR	27.3	1521	BC	17	1521	BC	0.2	53	PR	8.4	310	PR	0	9	DC	12.7	373	PR	0.1	13	PR	1.5	87	PR	9.2	12	KS	41.2	1521	BC	0.7	56	DC
6.4	201	PR	27.3	1522	BC	17.1	1522	BC	0.2	54	PR	8.4	311	PR	0	10	DC	12.9	374	PR	0.1	14	PR	1.5	88	PR	10.6	13	KS	41.3	1522	BC	0.7	57	DC
6.5	202	PR	27.3	1523	BC	17.1	1523	BC	0.2	55	PR	8.5	312	PR	0	11	DC	13	375	PR	0.1	15	PR	1.6	89	PR	11.2	14	KS	41.5	1523	BC	0.7	58	DC
6.5	203	PR	27.4	1524	BC	17.2	1524	BC	0.2	56	PR	8.5	313	PR	0.1	12	DC	13	376	PR	0.1	16	PR	1.7	90	PR	13.4	15	KS	41.6	1524	BC	0.7	59	DC
6.5	204	PR	27.4	1525	BC	17.2	1525	BC	0.2	57	PR	8.6	314	PR	0.1	13	DC	13.1	377	PR	0.1	17	PR	1.8	91	PR	15	16	KS	41.7	1525	BC	0.7	60	DC
6.6	205	PR	27.4	1526	BC	17.3	1526	BC	0.2	58	PR	8.6	315	PR	0.1	14	DC	13.2	378	PR	0.1	18	PR	1.9	92	PR	17.4	17	KS	41.7	1526	BC	0.7	61	DC
6.6	206	PR	27.4	1527	BC	17.4	1527	BC	0.2	59	PR	8.6	316	PR	0.1	15	DC	13.3	379	PR	0.1	19	PR	2	93	PR	19.1	18	KS	41.7	1527	BC	0.7	62	DC
6.6	207	PR	27.5	1528	BC	17.4	1528	BC	0.2	60	PR	8.7	317	PR	0.1	16	DC	13.3	380	PR	0.1	20	PR	2.1	94	PR	21.1	19	KS	41.7	1528	BC	0.8	63	DC
6.7	208	PR	27.5	1529	BC	17.5	1529	BC	0.2	61	PR	8.7	318	PR	0.1	17	DC	13.4	381	PR	0.1	21	PR	2.2	95	PR	23.9	20	KS	41.8	1529	BC	0.8	64	DC
6.7	209	PR	27.5	1530	BC	17.6	1530	BC	0.2	62	PR	8.8	319	PR	0.1	18	DC	13.5	382	PR	0.1	22	PR	2.4	96	PR	27	21	KS	41.8	1530	BC	0.8	65	DC
6.8	210	PR	27.6	1531	BC	17.6	1531	BC	0.2	63	PR	8.8	320	PR	0.1	19	DC	13.6	383	PR	0.1	23	PR	2.5	97	PR	30.9	22	KS	41.8	1531	BC	0.8	66	DC
6.8	211	PR	27.6	1532	BC	17.7	1532	BC	0.2	64	PR	8.9	321	PR	0.1	20	DC	13.6	384	PR	0.1	24	PR	2.6	98	PR	33.5	23	KS	41.8	1532	BC	0.8	67	DC
6.8	212	PR	27.6	1533	BC	17.7	1533	BC	0.2	65	PR	8.9	322	PR	0.1	21	DC	13.7	385	PR	0.1	25	PR	2.8	99	PR	39	24	KS	41.9	1533	BC	0.8	68	DC
6.9	213	PR	27.6	1534	BC	17.8	1534	BC	0.2	66	PR	9	323	PR	0.1	22	DC	13.8	386	PR	0.1	26	PR	2.9	100	PR	44.1	25	KS	41.9	1534	BC	0.9	69	DC
6.9	214	PR	27.7	1535	BC	17.9	1535	BC	0.2	67	PR	9	324	PR	0.1	23	DC	13.9	387	PR	0.1	27	PR	3.1	101	PR	50	26	KS	41.9	1535	BC	0.9	70	DC
6.9	215	PR	27.7	1536	BC	17.9	1536	BC	0.2	68	PR	9	325	PR	0.1	24	DC	14	388	PR	0.1	28	PR	3.2	102	PR	57.2	27	KS	42	1536	BC	0.9	71	DC
7	216	PR	27.7	1537	BC	18	1537	BC	0.2	69	PR	9.1	326	PR	0.1	25	DC	14.2	389	PR	0.1	29	PR	3.4	103	PR	66.6	28	KS	42	1537	BC	0.9	72	DC
7	217	PR	27.7	1538	BC	18	1538	BC	0.2	70	PR	9.1	327	PR	0.1	26	DC	14.2	390	PR	0.1	30	PR	3.5	104	PR	77.3	29	KS	42	1538	BC	0.9	73	DC
7	218	PR	27.8	1539	BC	18.1	1539	BC	0.2	71	PR	9.2	328	PR	0.1	27	DC	14.3	391	PR	0.1	31	PR	3.7	105	PR	89	30	KS	42.1	1539	BC	0.9	74	DC
7	219	PR	27.8	1540	BC	18.2	1540	BC	0.2	72	PR	9.2	329	PR	0.1	28	DC	14.3	392	PR	0.1	32	PR	3.9	106	PR	100	31	KS	42.1	1540	BC	1	75	DC
7.1	220	PR	27.8	1541	BC	18.2	1541	BC	0.2	73	PR	9.3	330	PR	0.1	29	DC	14.5	393	PR	0.1	33	PR	4.1	107	PR	0	1	PR	42.1	1541	BC	1	76	DC
7.1	221	PR	27.8	1542	BC	18.3	1542	BC	0.2	74	PR	9.3	331	PR	0.1	30	DC	14.5	394	PR	0.1	34	PR	4.3	108	PR	0	2	PR	42.2	1542	BC	1	77	DC
7.1	222	PR	27.9	1543	BC	18.4	1543	BC	0.2	75	PR	9.3	332	PR	0.2	31	DC	14.6	395	PR	0.2	35	PR	4.5	109	PR	0.1	3	PR	42.2	1543	BC	1.1	78	DC
7.2	223	PR	27.9	1544	BC	18.4	1544	BC	0.2	76	PR	9.3	333	PR	0.2	32	DC	14.7	396	PR	0.2	36	PR	4.8	110	PR	0.1	4	PR	42.2	1544	BC	1.1	79	DC
7.2	224	PR	27.9	1545	BC	18.5	1545	BC	0.2	77	PR	9.4	334	PR	0.2	33	DC	14.8	397	PR	0.2	37	PR	5.1	111	PR	0.1	5	PR	42.3	1545	BC	1.1	80	DC
7.3	225	PR	27.9	1546	BC	18.6	1546	BC	0.2	78	PR	9.4	335	PR	0.2	34	DC	14.8	398	PR	0.2	38	PR	5.4	112	PR	0.1	6	PR	42.3	1546	BC	1.2	81	DC
7.3	226	PR	28	1547	BC	18.7	1547	BC	0.2	79	PR	9.5	336	PR	0.2	35	DC	14.9	399	PR	0.2	39	PR	5.7	113	PR	0.1	7	PR	42.3	1547	BC	1.2	82	DC
7.4	227	PR	28.1	1548	BC	18.7	1548	BC	0.3	80	PR	9.5	337	PR	0.2	36	DC	15	400	PR	0.2	40	PR	6	114	PR	0.1	8	PR	42.4	1548	BC	1.2	83	DC
7.5	228	PR	28.1	1549	BC	18.7	1549	BC	0.3	81	PR	9.5	338	PR	0.2	37	DC	15	401	PR	0.2	41	PR	6.3	115	PR	0.2	9	PR	42.4	1549	BC	1.2	84	DC
7.5	229	PR	28.1	1550	BC	18.8	1550	BC	0.3	82	PR	9.6	339	PR	0.2	38	DC	15.1	402	PR	0.2	42	PR	6.7	116	PR	0.2	10	PR	42.4	1550	BC	1.3	85	DC
7.5	230	PR	28.1	1551	BC	18.9	1551	BC	0.3	83	PR	9.6	340	PR	0.2	39	DC	15.1	403	PR	0.2	43	PR	7.1	117	PR	0.2	11	PR	42.4	1551	BC	1.3	86	DC
7.6	231	PR	28.2	1552	BC	19	1552	BC	0.3	84	PR	9.6	341	PR	0.2	40	DC	15.3	404	PR	0.2	44	PR	7.5	118	PR	0.2	12	PR	42.5	1552	BC	1.3	87	DC
7.6	232	PR	28.2	1553	BC	19	1553	BC	0.3	85	PR	9.7	342	PR	0.2	41	DC	15.4	405	PR	0.2	45	PR	8	119	PR	0.2	13	PR	42.5	1553	BC	1.4	88	DC
7.6	233	PR	28.2	1554	BC	19.1	1554	BC	0.3	86	PR	9.7	343	PR	0.2	42	DC	15.5	406	PR	0.2	46	PR	8.5	120	PR	0.2	14	PR	42.6	1554	BC	1.4	89	DC
7.7	234	PR	28.2	1555	BC	19.2	1555	BC	0.3	87	PR	9.7	344	PR	0.2	43	DC	15.6	407	PR	0.2	47	PR	9	121	PR	0.3	15	PR	42.6	1555	BC	1.4	90	DC
7.7	235	PR	28.3	1556	BC	19.3	1556	BC	0.3	88	PR	9.8	345	PR	0.2	44	DC	15.7	408	PR	0.2	48	PR	9.6	122	PR	0.3	16	PR	42.6	1556	BC	1.4	91	DC
7.8	236	PR	28.4	1557	BC	19.4	1557	BC	0.3	89	PR	9.8	346	PR	0.2	45	DC	15.8	409	PR	0.2	49	PR	10.1	123	PR	0.3	17	PR	42.6	1557	BC	1.4	92	DC
7.8	237	PR	28.4	1558	BC	19.5	1558	BC	0.3	90	PR	9.8	347	PR	0.2	46	DC	16	410	PR	0.2	50	PR	10.8	124	PR	0.3	18	PR	42.7	1558	BC	1.5	93	DC
7.8	238	PR	28.4	1559	BC	19.5	1559	BC	0.3	91	PR	9.8	348	PR	0.2	47	DC	16.1	411	PR	0.3	51	PR	11.5	125	PR	0.3	19	PR	42.7	1559	BC	1.5	94	DC
7.9	239	PR	28.5	1560	BC	19.6	1560	BC	0.3	92	PR	9.9	349	PR	0.3	48	DC	16.1	412	PR	0.3	52	PR	12.1	126	PR	0.3	20	PR	42.8	1560	BC	1.5	95	DC
8	240	PR	28.5	1561	BC	19.7	1561	BC	0.3	93	PR	9.9	350	PR	0.3	49	DC	16.2	413	PR	0.3	53	PR	12.8	127	PR	0.4	21	PR	42.8	1561	BC	1.6	96	DC
8.1	241	PR	28.5	1562	BC	19.8	1562	BC	0.3	94	PR	10	351	PR	0.3	50	DC	16.3	414	PR	0.3	54	PR	13.7	128	PR	0.4	22	PR	42.8	1562	BC	1.6	97	DC
8.3	242	PR	28.5	1563	BC	19.9	1563	BC	0.3	95	PR	10	352	PR	0.3	51	DC	16.4	415	PR	0.3	55	PR	14.5	129	PR	0.4	23	PR	42.8	1563	BC	1.6	98	DC
8.3	243	PR	28.5	1564	BC	19.9	1564	BC	0.3	96	PR	10	353	PR	0.3	52	DC	16.5	416	PR	0.3	56	PR	15.3	130	PR	0.4	24	PR	42.8	1564	BC	1.7	99	DC
8.4	244	PR	28.6	1565	BC	20	1565	BC	0.3	97	PR	10	354	PR	0.3	53	DC	16.6	417	PR	0.3	57	PR	16.2	131	PR	0.4	25	PR	42.9	1565	BC	1.8	100	DC
8.4	245	PR	28.6	1566	BC	20.1	1566	BC	0.3	98	PR	10.1	355	PR	0.3	54	DC	16.7	418	PR	0.3	58	PR	17	132	PR	0.4	26	PR	42.9	1566	BC	1.8	101	DC
8.4	246	PR	28.6	1567	BC	20.2	1567	BC	0.3	99	PR	10.3	356	PR	0.3	55	DC	16.8	419	PR	0.4	59	PR	17.8	133	PR	0.5	27	PR	42.9	1567	BC	1.9	102	DC
8.4	247	PR	28.7	1568	BC	20.3	1568	BC	0.3	100	PR	10.3	357	PR	0.3	56	DC	16.9	420	PR	0.4	60	PR	18.6	134	PR	0.5	28	PR	42.9	1568	BC	1.9	103	DC
8.5	248	PR	28.7	1569	BC	20.4	1569	BC	0.3	101	PR	10.3	358	PR	0.3	57	DC	17	421	PR	0.4	61	PR	19.3	135	PR	0.5	29	PR	43	1569	BC	2	104	DC
8.5	249	PR	28.7	1570	BC	20.4	1570	BC	0.3	102	PR	10.3	359	PR	0.3	58	DC	17	422	PR	0.4	62	PR	20.2	136	PR	0.5	30	PR	43	1570	BC	2	105	DC
8.5	250	PR	28.7	1571	BC	20.5	1571	BC	0.3	103	PR	10.4	360	PR	0.3	59	DC	17.1	423	PR	0.4	63	PR	21	137	PR	0.5	31	PR	43	1571	BC	2.1	106	DC
8.6	251	PR	28.7	1572	BC	20.6	1572	BC	0.3	104	PR	10.4	361	PR	0.3	60	DC	17.1	424	PR	0.4	64	PR	21.6	138	PR	0.5	32	PR	43.1	1572	BC	2.1	107	DC
8.6	252	PR	28.8	1573	BC	20.7	1573	BC	0.3	105	PR	10.5	362	PR	0.3	61	DC	17.3	425	PR	0.5	65	PR	22.2	139	PR	0.6	33	PR	43.1	1573	BC	2.2	108	DC
8.6	253	PR	28.8	1574	BC	20.8	1574	BC	0.3	106	PR	10.5	363	PR	0.3	62	DC	17.3	426	PR	0.5	66	PR	22.7	140	PR	0.6	34	PR	43.1	1574	BC	2.2	109	DC
8.7	254	PR	28.9	1575	BC	20.8	1575	BC	0.3	107	PR	10.6	364	PR	0.4	63	DC	17.4	427	PR	0.5	67	PR	23.1	141	PR	0.6	35	PR	43.2	1575	BC	2.3	110	DC
8.7	255	PR	29	1576	BC	21	1576	BC	0.3	108	PR	10.6	365	PR	0.4	64	DC	17.5	428	PR	0.5	68	PR	23.5	142	PR	0.6	36	PR	43.2	1576	BC	2.3	111	DC
8.8	256	PR	29	1577	BC	21.1	1577	BC	0.3	109	PR	10.6	366	PR	0.4	65	DC	17.6	429	PR	0.6	69	PR	23.8	143	PR	0.6	37	PR	43.3	1577	BC	2.4	112	DC
8.8	257	PR	29	1578	BC	21.2	1578	BC	0.3	110	PR	10.6	367	PR	0.4	66	DC	17.6	430	PR	0.6	70	PR	24.1	144	PR	0.6	38	PR	43.3	1578	BC	2.4	113	DC
8.9	258	PR	29	1579	BC	21.3	1579	BC	0.4	111	PR	10.7	368	PR	0.4	67	DC	17.8	431	PR	0.6	71	PR	24.3	145	PR	0.7	39	PR	43.3	1579	BC	2.4	114	DC
8.9	259	PR	29.1	1580	BC	21.4	1580	BC	0.4	112	PR	10.9	369	PR	0.4	68	DC	17.9	432	PR	0.6	72	PR	24.4	146	PR	0.7	40	PR	43.4	1580	BC	2.4	115	DC
9	260	PR	29.2	1581	BC	21.5	1581	BC	0.4	113	PR	10.9	370	PR	0.4	69	DC	18	433	PR	0.6	73	PR	24.6	147	PR	0.7	41	PR	43.5	1581	BC	2.5	116	DC
9	261	PR	29.2	1582	BC	21.5	1582	BC	0.4	114	PR	10.9	371	PR	0.4	70	DC	18.2	434	PR	0.7	74	PR	24.7	148	PR	0.7	42	PR	43.5	1582	BC	2.6	117	DC
9.1	262	PR	29.2	1583	BC	21.6	1583	BC	0.4	115	PR	11	372	PR	0.4	71	DC	18.3	435	PR	0.7	75	PR	24.8	149	PR	0.7	43	PR	43.5	1583	BC	2.7	118	DC
9.1	263	PR	29.3	1584	BC	21.7	1584	BC	0.4	116	PR	11	373	PR	0.4	72	DC	18.4	436	PR	0.7	76	PR	25	150	PR	0.7	44	PR	43.5	1584	BC	2.7	119	DC
9.2	264	PR	29.3	1585	BC	21.8	1585	BC	0.4	117	PR	11.1	374	PR	0.4	73	DC	18.4	437	PR	0.8	77	PR	25.1	151	PR	0.8	45	PR	43.5	1585	BC	2.8	120	DC
9.3	265	PR	29.3	1586	BC	21.9	1586	BC	0.4	118	PR	11.1	375	PR	0.4	74	DC	18.5	438	PR	0.8	78	PR	25.3	152	PR	0.8	46	PR	43.6	1586	BC	2.9	121	DC
9.3	266	PR	29.4	1587	BC	22.1	1587	BC	0.4	119	PR	11.1	376	PR	0.4	75	DC	18.7	439	PR	0.8	79	PR	25.5	153	PR	0.8	47	PR	43.6	1587	BC	3	122	DC
9.4	267	PR	29.4	1588	BC	22.6	1588	BC	0.4	120	PR	11.2	377	PR	0.4	76	DC	18.7	440	PR	0.8	80	PR	25.7	154	PR	0.8	48	PR	43.6	1588	BC	3.1	123	DC
9.4	268	PR	29.4	1589	BC	22.7	1589	BC	0.4	121	PR	11.2	378	PR	0.4	77	DC	18.9	441	PR	0.9	81	PR	25.9	155	PR	0.8	49	PR	43.7	1589	BC	3.1	124	DC
9.5	269	PR	29.5	1590	BC	22.8	1590	BC	0.4	122	PR	11.3	379	PR	0.4	78	DC	19	442	PR	0.9	82	PR	26.1	156	PR	0.9	50	PR	43.7	1590	BC	3.2	125	DC
9.5	270	PR	29.5	1591	BC	22.9	1591	BC	0.4	123	PR	11.3	380	PR	0.4	79	DC	19.1	443	PR	1	83	PR	26.4	157	PR	0.9	51	PR	43.8	1591	BC	3.2	126	DC
9.6	271	PR	29.5	1592	BC	23	1592	BC	0.4	124	PR	11.3	381	PR	0.5	80	DC	19.2	444	PR	1	84	PR	26.6	158	PR	0.9	52	PR	43.8	1592	BC	3.3	127	DC
9.6	272	PR	29.5	1593	BC	23.1	1593	BC	0.4	125	PR	11.4	382	PR	0.5	81	DC	19.2	445	PR	1.1	85	PR	26.9	159	PR	0.9	53	PR	43.8	1593	BC	3.4	128	DC
9.7	273	PR	29.6	1594	BC	23.1	1594	BC	0.4	126	PR	11.5	383	PR	0.5	82	DC	19.4	446	PR	1.1	86	PR	27.2	160	PR	0.9	54	PR	43.8	1594	BC	3.5	129	DC
9.7	274	PR	29.6	1595	BC	23.2	1595	BC	0.4	127	PR	11.5	384	PR	0.5	83	DC	19.5	447	PR	1.2	87	PR	27.6	161	PR	1	55	PR	43.9	1595	BC	3.6	130	DC
9.8	275	PR	29.6	1596	BC	23.3	1596	BC	0.4	128	PR	11.6	385	PR	0.5	84	DC	19.5	448	PR	1.2	88	PR	28.1	162	PR	1	56	PR	43.9	1596	BC	3.7	131	DC
9.8	276	PR	29.7	1597	BC	23.4	1597	BC	0.4	129	PR	11.7	386	PR	0.5	85	DC	19.6	449	PR	1.3	89	PR	28.4	163	PR	1	57	PR	43.9	1597	BC	3.8	132	DC
9.9	277	PR	29.8	1598	BC	23.5	1598	BC	0.4	130	PR	11.8	387	PR	0.5	86	DC	19.7	450	PR	1.4	90	PR	28.8	164	PR	1	58	PR	43.9	1598	BC	3.9	133	DC
10	278	PR	29.8	1599	BC	23.6	1599	BC	0.4	131	PR	11.8	388	PR	0.5	87	DC	19.9	451	PR	1.5	91	PR	29.4	165	PR	1	59	PR	44	1599	BC	4	134	DC
10	279	PR	29.8	1600	BC	23.7	1600	BC	0.4	132	PR	11.9	389	PR	0.5	88	DC	20.1	452	PR	1.6	92	PR	30.1	166	PR	1	60	PR	44	1600	BC	4.1	135	DC
10.1	280	PR	29.9	1601	BC	23.8	1601	BC	0.4	133	PR	12	390	PR	0.5	89	DC	20.3	453	PR	1.7	93	PR	30.8	167	PR	1.1	61	PR	44.1	1601	BC	4.2	136	DC
10.1	281	PR	29.9	1602	BC	23.9	1602	BC	0.4	134	PR	12	391	PR	0.6	90	DC	20.4	454	PR	1.7	94	PR	31.3	168	PR	1.1	62	PR	44.1	1602	BC	4.4	137	DC
10.2	282	PR	29.9	1603	BC	24	1603	BC	0.4	135	PR	12.1	392	PR	0.6	91	DC	20.5	455	PR	1.9	95	PR	32	169	PR	1.1	63	PR	44.1	1603	BC	4.6	138	DC
10.2	283	PR	30	1604	BC	24.1	1604	BC	0.4	136	PR	12.2	393	PR	0.6	92	DC	20.6	456	PR	2	96	PR	33.3	170	PR	1.1	64	PR	44.2	1604	BC	4.8	139	DC
10.3	284	PR	30	1605	BC	24.3	1605	BC	0.4	137	PR	12.2	394	PR	0.6	93	DC	20.7	457	PR	2.1	97	PR	34.5	171	PR	1.1	65	PR	44.2	1605	BC	5	140	DC
10.3	285	PR	30	1606	BC	24.4	1606	BC	0.4	138	PR	12.2	395	PR	0.6	94	DC	20.8	458	PR	2.3	98	PR	35.2	172	PR	1.2	66	PR	44.3	1606	BC	5.2	141	DC
10.4	286	PR	30.1	1607	BC	24.5	1607	BC	0.5	139	PR	12.3	396	PR	0.6	95	DC	20.9	459	PR	2.4	99	PR	36.2	173	PR	1.2	67	PR	44.3	1607	BC	5.4	142	DC
10.4	287	PR	30.1	1608	BC	24.5	1608	BC	0.5	140	PR	12.4	397	PR	0.6	96	DC	21.1	460	PR	2.5	100	PR	38.3	174	PR	1.2	68	PR	44.3	1608	BC	5.7	143	DC
10.5	288	PR	30.1	1609	BC	24.6	1609	BC	0.5	141	PR	12.4	398	PR	0.7	97	DC	21.2	461	PR	2.7	101	PR	40.9	175	PR	1.2	69	PR	44.4	1609	BC	5.8	144	DC
10.5	289	PR	30.1	1610	BC	24.8	1610	BC	0.5	142	PR	12.5	399	PR	0.7	98	DC	21.3	462	PR	2.8	102	PR	42.2	176	PR	1.2	70	PR	44.4	1610	BC	6	145	DC
10.5	290	PR	30.2	1611	BC	24.9	1611	BC	0.5	143	PR	12.6	400	PR	0.7	99	DC	21.6	463	PR	2.9	103	PR	43.8	177	PR	1.2	71	PR	44.5	1611	BC	6.2	146	DC
10.6	291	PR	30.2	1612	BC	25	1612	BC	0.5	144	PR	12.6	401	PR	0.7	100	DC	21.7	464	PR	3.1	104	PR	47.2	178	PR	1.3	72	PR	44.5	1612	BC	6.4	147	DC
10.6	292	PR	30.2	1613	BC	25.1	1613	BC	0.5	145	PR	12.6	402	PR	0.7	101	DC	21.8	465	PR	3.3	105	PR	53.8	179	PR	1.3	73	PR	44.5	1613	BC	6.6	148	DC
10.7	293	PR	30.3	1614	BC	25.2	1614	BC	0.5	146	PR	12.7	403	PR	0.7	102	DC	22.1	466	PR	3.5	106	PR	57.1	180	PR	1.3	74	PR	44.5	1614	BC	6.9	149	DC
10.7	294	PR	30.3	1615	BC	25.3	1615	BC	0.5	147	PR	12.7	404	PR	0.7	103	DC	22.2	467	PR	3.7	107	PR	60.1	181	PR	1.3	75	PR	44.6	1615	BC	7.1	150	DC
10.8	295	PR	30.3	1616	BC	25.5	1616	BC	0.5	148	PR	12.8	405	PR	0.7	104	DC	22.3	468	PR	3.9	108	PR	67.6	182	PR	1.4	76	PR	44.6	1616	BC	7.4	151	DC
10.8	296	PR	30.3	1617	BC	25.6	1617	BC	0.5	149	PR	12.8	406	PR	0.8	105	DC	22.4	469	PR	4	109	PR	88.6	183	PR	1.4	77	PR	44.6	1617	BC	7.7	152	DC
10.8	297	PR	30.3	1618	BC	25.7	1618	BC	0.5	150	PR	12.9	407	PR	0.8	106	DC	22.6	470	PR	4.3	110	PR	100	184	PR	1.4	78	PR	44.7	1618	BC	8.1	153	DC
11	298	PR	30.3	1619	BC	25.8	1619	BC	0.5	151	PR	12.9	408	PR	0.8	107	DC	22.7	471	PR	4.5	111	PR	0	1	SCNC	1.4	79	PR	44.7	1619	BC	8.4	154	DC
11	299	PR	30.4	1620	BC	26	1620	BC	0.5	152	PR	12.9	409	PR	0.8	108	DC	22.9	472	PR	4.7	112	PR	0	2	SCNC	1.5	80	PR	44.8	1620	BC	8.8	155	DC
11.1	300	PR	30.4	1621	BC	26.1	1621	BC	0.5	153	PR	13	410	PR	0.8	109	DC	23.1	473	PR	4.9	113	PR	0	3	SCNC	1.5	81	PR	44.8	1621	BC	9.2	156	DC
11.2	301	PR	30.4	1622	BC	26.3	1622	BC	0.5	154	PR	13.1	411	PR	0.8	110	DC	23.3	474	PR	5.2	114	PR	0	4	SCNC	1.5	82	PR	44.8	1622	BC	9.6	157	DC
11.3	302	PR	30.4	1623	BC	26.4	1623	BC	0.5	155	PR	13.1	412	PR	0.8	111	DC	23.4	475	PR	5.4	115	PR	0	5	SCNC	1.5	83	PR	44.9	1623	BC	10	158	DC
11.4	303	PR	30.5	1624	BC	26.5	1624	BC	0.5	156	PR	13.2	413	PR	0.8	112	DC	23.5	476	PR	5.7	116	PR	0	6	SCNC	1.5	84	PR	44.9	1624	BC	10.4	159	DC
11.5	304	PR	30.5	1625	BC	26.7	1625	BC	0.5	157	PR	13.2	414	PR	0.9	113	DC	23.6	477	PR	6	117	PR	0	7	SCNC	1.5	85	PR	44.9	1625	BC	10.9	160	DC
11.5	305	PR	30.5	1626	BC	26.8	1626	BC	0.5	158	PR	13.3	415	PR	0.9	114	DC	23.7	478	PR	6.3	118	PR	0	8	SCNC	1.6	86	PR	45	1626	BC	11.5	161	DC
11.5	306	PR	30.6	1627	BC	27	1627	BC	0.5	159	PR	13.5	416	PR	0.9	115	DC	23.8	479	PR	6.6	119	PR	0	9	SCNC	1.6	87	PR	45	1627	BC	12.3	162	DC
11.6	307	PR	30.6	1628	BC	27.1	1628	BC	0.5	160	PR	13.6	417	PR	0.9	116	DC	23.9	480	PR	6.9	120	PR	0	10	SCNC	1.6	88	PR	45	1628	BC	13.1	163	DC
11.8	308	PR	30.6	1629	BC	27.2	1629	BC	0.5	161	PR	13.6	418	PR	1	117	DC	24	481	PR	7.3	121	PR	0	11	SCNC	1.6	89	PR	45.1	1629	BC	13.9	164	DC
11.9	309	PR	30.7	1630	BC	27.4	1630	BC	0.5	162	PR	13.7	419	PR	1	118	DC	24.2	482	PR	7.7	122	PR	0	12	SCNC	1.6	90	PR	45.1	1630	BC	14.8	165	DC
11.9	310	PR	30.7	1631	BC	27.5	1631	BC	0.5	163	PR	13.8	420	PR	1	119	DC	24.4	483	PR	8	123	PR	0	13	SCNC	1.7	91	PR	45.1	1631	BC	15.5	166	DC
12	311	PR	30.7	1632	BC	27.7	1632	BC	0.5	164	PR	13.8	421	PR	1	120	DC	24.5	484	PR	8.3	124	PR	0	14	SCNC	1.7	92	PR	45.1	1632	BC	16.4	167	DC
12	312	PR	30.7	1633	BC	27.8	1633	BC	0.5	165	PR	14	422	PR	1	121	DC	24.7	485	PR	8.8	125	PR	0	15	SCNC	1.7	93	PR	45.2	1633	BC	17.4	168	DC
12.1	313	PR	30.8	1634	BC	28	1634	BC	0.5	166	PR	14.1	423	PR	1.1	122	DC	24.8	486	PR	9.2	126	PR	0	16	SCNC	1.7	94	PR	45.2	1634	BC	18.8	169	DC
12.3	314	PR	30.8	1635	BC	28.2	1635	BC	0.6	167	PR	14.2	424	PR	1.1	123	DC	25	487	PR	9.6	127	PR	0.1	17	SCNC	1.8	95	PR	45.3	1635	BC	20.2	170	DC
12.3	315	PR	30.8	1636	BC	28.4	1636	BC	0.6	168	PR	14.3	425	PR	1.1	124	DC	25.2	488	PR	10.1	128	PR	0.1	18	SCNC	1.8	96	PR	45.3	1636	BC	21.6	171	DC
12.3	316	PR	30.9	1637	BC	28.5	1637	BC	0.6	169	PR	14.4	426	PR	1.1	125	DC	25.3	489	PR	10.5	129	PR	0.1	19	SCNC	1.8	97	PR	45.4	1637	BC	23.5	172	DC
12.4	317	PR	30.9	1638	BC	28.7	1638	BC	0.6	170	PR	14.4	427	PR	1.2	126	DC	25.5	490	PR	11	130	PR	0.1	20	SCNC	1.8	98	PR	45.4	1638	BC	25.5	173	DC
12.5	318	PR	30.9	1639	BC	28.9	1639	BC	0.6	171	PR	14.5	428	PR	1.2	127	DC	25.6	491	PR	11.5	131	PR	0.1	21	SCNC	1.8	99	PR	45.5	1639	BC	27.8	174	DC
12.6	319	PR	31	1640	BC	29.1	1640	BC	0.6	172	PR	14.5	429	PR	1.2	128	DC	25.8	492	PR	12	132	PR	0.1	22	SCNC	1.8	100	PR	45.5	1640	BC	30.1	175	DC
12.7	320	PR	31	1641	BC	29.3	1641	BC	0.6	173	PR	14.6	430	PR	1.3	129	DC	26	493	PR	12.5	133	PR	0.1	23	SCNC	1.9	101	PR	45.6	1641	BC	33.2	176	DC
12.8	321	PR	31	1642	BC	29.4	1642	BC	0.6	174	PR	14.7	431	PR	1.3	130	DC	26.2	494	PR	13.1	134	PR	0.1	24	SCNC	1.9	102	PR	45.6	1642	BC	36.8	177	DC
12.8	322	PR	31	1643	BC	29.6	1643	BC	0.6	175	PR	14.7	432	PR	1.3	131	DC	26.3	495	PR	13.6	135	PR	0.1	25	SCNC	1.9	103	PR	45.7	1643	BC	41.1	178	DC
12.9	323	PR	31.1	1644	BC	29.8	1644	BC	0.6	176	PR	14.8	433	PR	1.4	132	DC	26.4	496	PR	14.2	136	PR	0.1	26	SCNC	1.9	104	PR	45.7	1644	BC	45.8	179	DC
12.9	324	PR	31.1	1645	BC	29.9	1645	BC	0.6	177	PR	14.9	434	PR	1.4	133	DC	26.6	497	PR	14.8	137	PR	0.1	27	SCNC	1.9	105	PR	45.7	1645	BC	51.8	180	DC
13	325	PR	31.1	1646	BC	30.1	1646	BC	0.6	178	PR	15	435	PR	1.4	134	DC	26.8	498	PR	15.3	138	PR	0.1	28	SCNC	2	106	PR	45.8	1646	BC	60	181	DC
13	326	PR	31.2	1647	BC	30.3	1647	BC	0.6	179	PR	15	436	PR	1.5	135	DC	27	499	PR	16	139	PR	0.1	29	SCNC	2	107	PR	45.8	1647	BC	69.9	182	DC
13	327	PR	31.2	1648	BC	30.5	1648	BC	0.6	180	PR	15	437	PR	1.5	136	DC	27.2	500	PR	16.6	140	PR	0.1	30	SCNC	2	108	PR	45.8	1648	BC	83.5	183	DC
13.1	328	PR	31.2	1649	BC	30.8	1649	BC	0.6	181	PR	15.1	438	PR	1.5	137	DC	27.3	501	PR	17.3	141	PR	0.1	31	SCNC	2	109	PR	45.9	1649	BC	100	184	DC
13.1	329	PR	31.2	1650	BC	31	1650	BC	0.6	182	PR	15.2	439	PR	1.6	138	DC	27.5	502	PR	18	142	PR	0.1	32	SCNC	2.1	110	PR	46	1650	BC	1.7	1	KS
13.1	330	PR	31.2	1651	BC	31.2	1651	BC	0.6	183	PR	15.3	440	PR	1.6	139	DC	27.6	503	PR	18.6	143	PR	0.1	33	SCNC	2.1	111	PR	46	1651	BC	1.8	2	KS
13.2	331	PR	31.3	1652	BC	31.5	1652	BC	0.6	184	PR	15.3	441	PR	1.6	140	DC	27.8	504	PR	19.1	144	PR	0.1	34	SCNC	2.1	112	PR	46.1	1652	BC	1.9	3	KS
13.2	332	PR	31.3	1653	BC	31.7	1653	BC	0.6	185	PR	15.4	442	PR	1.7	141	DC	28.1	505	PR	19.8	145	PR	0.1	35	SCNC	2.1	113	PR	46.2	1653	BC	2	4	KS
13.3	333	PR	31.4	1654	BC	31.9	1654	BC	0.6	186	PR	15.5	443	PR	1.7	142	DC	28.2	506	PR	20.4	146	PR	0.1	36	SCNC	2.1	114	PR	46.3	1654	BC	2.1	5	KS
13.4	334	PR	31.4	1655	BC	32.2	1655	BC	0.6	187	PR	15.6	444	PR	1.7	143	DC	28.4	507	PR	21	147	PR	0.1	37	SCNC	2.2	115	PR	46.3	1655	BC	2.3	6	KS
13.5	335	PR	31.4	1656	BC	32.4	1656	BC	0.6	188	PR	15.7	445	PR	1.8	144	DC	28.6	508	PR	21.5	148	PR	0.1	38	SCNC	2.2	116	PR	46.4	1656	BC	2.4	7	KS
13.5	336	PR	31.4	1657	BC	32.7	1657	BC	0.6	189	PR	15.7	446	PR	1.8	145	DC	28.7	509	PR	22	149	PR	0.1	39	SCNC	2.2	117	PR	46.5	1657	BC	2.4	8	KS
13.5	337	PR	31.5	1658	BC	34.4	1658	BC	0.6	190	PR	15.8	447	PR	1.9	146	DC	28.8	510	PR	22.5	150	PR	0.1	40	SCNC	2.2	118	PR	46.6	1658	BC	2.6	9	KS
13.6	338	PR	31.6	1659	BC	34.6	1659	BC	0.7	191	PR	15.9	448	PR	2	147	DC	29.1	511	PR	22.8	151	PR	0.1	41	SCNC	2.3	119	PR	46.8	1659	BC	2.7	10	KS
13.7	339	PR	31.6	1660	BC	34.8	1660	BC	0.7	192	PR	15.9	449	PR	2	148	DC	29.2	512	PR	23.1	152	PR	0.1	42	SCNC	2.3	120	PR	47.1	1660	BC	2.8	11	KS
13.7	340	PR	31.6	1661	BC	35	1661	BC	0.7	193	PR	16	450	PR	2	149	DC	29.5	513	PR	23.5	153	PR	0.1	43	SCNC	2.3	121	PR	52.4	1661	BC	3	12	KS
13.8	341	PR	31.7	1662	BC	35.2	1662	BC	0.7	194	PR	16.1	451	PR	2.1	150	DC	29.6	514	PR	23.8	154	PR	0.2	44	SCNC	2.3	122	PR	52.6	1662	BC	3.1	13	KS
13.9	342	PR	31.7	1663	BC	35.4	1663	BC	0.7	195	PR	16.2	452	PR	2.2	151	DC	29.7	515	PR	24	155	PR	0.2	45	SCNC	2.4	123	PR	52.8	1663	BC	3.2	14	KS
13.9	343	PR	31.8	1664	BC	35.7	1664	BC	0.7	196	PR	16.3	453	PR	2.2	152	DC	29.8	516	PR	24.2	156	PR	0.2	46	SCNC	2.4	124	PR	52.9	1664	BC	3.6	15	KS
14	344	PR	31.8	1665	BC	35.9	1665	BC	0.7	197	PR	16.3	454	PR	2.3	153	DC	30.1	517	PR	24.4	157	PR	0.2	47	SCNC	2.4	125	PR	52.9	1665	BC	3.8	16	KS
14	345	PR	31.9	1666	BC	36.1	1666	BC	0.7	198	PR	16.4	455	PR	2.3	154	DC	30.3	518	PR	24.5	158	PR	0.2	48	SCNC	2.4	126	PR	53	1666	BC	4	17	KS
14.1	346	PR	32	1667	BC	36.3	1667	BC	0.7	199	PR	16.5	456	PR	2.3	155	DC	30.5	519	PR	24.6	159	PR	0.2	49	SCNC	2.5	127	PR	53.1	1667	BC	4.1	18	KS
14.3	347	PR	32.1	1668	BC	36.5	1668	BC	0.7	200	PR	16.6	457	PR	2.4	156	DC	30.6	520	PR	24.8	160	PR	0.2	50	SCNC	2.5	128	PR	53.1	1668	BC	4.2	19	KS
14.3	348	PR	32.1	1669	BC	36.7	1669	BC	0.7	201	PR	16.7	458	PR	2.5	157	DC	30.9	521	PR	24.9	161	PR	0.2	51	SCNC	2.5	129	PR	53.1	1669	BC	4.4	20	KS
14.4	349	PR	32.2	1670	BC	36.9	1670	BC	0.7	202	PR	16.8	459	PR	2.6	158	DC	31.1	522	PR	25	162	PR	0.2	52	SCNC	2.6	130	PR	53.2	1670	BC	4.5	21	KS
14.5	350	PR	32.2	1671	BC	37.2	1671	BC	0.7	203	PR	16.9	460	PR	2.6	159	DC	31.4	523	PR	25.1	163	PR	0.2	53	SCNC	2.6	131	PR	53.2	1671	BC	4.7	22	KS
14.5	351	PR	32.3	1672	BC	37.4	1672	BC	0.7	204	PR	17	461	PR	2.7	160	DC	31.4	524	PR	25.2	164	PR	0.2	54	SCNC	2.6	132	PR	53.2	1672	BC	5.1	23	KS
14.8	352	PR	32.3	1673	BC	37.6	1673	BC	0.7	205	PR	17	462	PR	2.8	161	DC	31.7	525	PR	25.3	165	PR	0.2	55	SCNC	2.6	133	PR	53.2	1673	BC	5.3	24	KS
15	353	PR	32.4	1674	BC	37.9	1674	BC	0.7	206	PR	17	463	PR	2.9	162	DC	31.9	526	PR	25.5	166	PR	0.2	56	SCNC	2.6	134	PR	53.3	1674	BC	5.6	25	KS
15	354	PR	32.4	1675	BC	38.1	1675	BC	0.7	207	PR	17.1	464	PR	2.9	163	DC	32.2	527	PR	25.5	167	PR	0.2	57	SCNC	2.6	135	PR	53.3	1675	BC	5.7	26	KS
15.1	355	PR	32.4	1676	BC	38.4	1676	BC	0.7	208	PR	17.1	465	PR	3	164	DC	32.3	528	PR	25.7	168	PR	0.2	58	SCNC	2.7	136	PR	53.3	1676	BC	5.9	27	KS
15.2	356	PR	32.4	1677	BC	38.6	1677	BC	0.7	209	PR	17.1	466	PR	3.2	165	DC	32.5	529	PR	25.8	169	PR	0.2	59	SCNC	2.7	137	PR	53.4	1677	BC	7.5	28	KS
15.2	357	PR	32.5	1678	BC	38.9	1678	BC	0.7	210	PR	17.2	467	PR	3.3	166	DC	32.8	530	PR	25.9	170	PR	0.2	60	SCNC	2.7	138	PR	53.5	1678	BC	9	29	KS
15.3	358	PR	35	1679	BC	39.1	1679	BC	0.8	211	PR	17.3	468	PR	3.4	167	DC	33.1	531	PR	26.1	171	PR	0.2	61	SCNC	2.7	139	PR	53.5	1679	BC	10.8	30	KS
15.4	359	PR	35.1	1680	BC	39.3	1680	BC	0.8	212	PR	17.4	469	PR	3.5	168	DC	33.4	532	PR	26.3	172	PR	0.2	62	SCNC	2.8	140	PR	53.6	1680	BC	13	31	KS
15.9	360	PR	35.1	1681	BC	39.6	1681	BC	0.8	213	PR	17.5	470	PR	3.6	169	DC	33.7	533	PR	26.4	173	PR	0.2	63	SCNC	2.8	141	PR	53.6	1681	BC	15.4	32	KS
16	361	PR	35.1	1682	BC	39.9	1682	BC	0.8	214	PR	17.5	471	PR	3.7	170	DC	33.8	534	PR	26.6	174	PR	0.2	64	SCNC	2.8	142	PR	53.6	1682	BC	18.1	33	KS
16	362	PR	35.2	1683	BC	40.3	1683	BC	0.8	215	PR	17.6	472	PR	3.8	171	DC	34	535	PR	26.8	175	PR	0.2	65	SCNC	2.8	143	PR	53.7	1683	BC	21.5	34	KS
16.1	363	PR	35.2	1684	BC	40.6	1684	BC	0.8	216	PR	17.7	473	PR	4	172	DC	34.4	536	PR	27.1	176	PR	0.2	66	SCNC	2.8	144	PR	53.7	1684	BC	25.6	35	KS
16.2	364	PR	35.2	1685	BC	40.9	1685	BC	0.8	217	PR	17.9	474	PR	4.1	173	DC	34.5	537	PR	27.3	177	PR	0.2	67	SCNC	2.9	145	PR	53.7	1685	BC	30.2	36	KS
16.3	365	PR	35.2	1686	BC	41.1	1686	BC	0.8	218	PR	17.9	475	PR	4.3	174	DC	35	538	PR	27.5	178	PR	0.3	68	SCNC	2.9	146	PR	53.7	1686	BC	36.6	37	KS
16.4	366	PR	35.3	1687	BC	41.4	1687	BC	0.8	219	PR	18	476	PR	4.5	175	DC	35.3	539	PR	27.7	179	PR	0.3	69	SCNC	2.9	147	PR	53.8	1687	BC	44	38	KS
16.5	367	PR	35.3	1688	BC	41.8	1688	BC	0.8	220	PR	18.1	477	PR	4.6	176	DC	35.6	540	PR	27.9	180	PR	0.3	70	SCNC	3	148	PR	53.8	1688	BC	53.8	39	KS
16.7	368	PR	35.4	1689	BC	42.1	1689	BC	0.8	221	PR	18.1	478	PR	4.8	177	DC	35.9	541	PR	28.3	181	PR	0.3	71	SCNC	3	149	PR	53.9	1689	BC	65.8	40	KS
16.7	369	PR	35.4	1690	BC	42.4	1690	BC	0.8	222	PR	18.2	479	PR	4.9	178	DC	36.2	542	PR	28.7	182	PR	0.3	72	SCNC	3.1	150	PR	53.9	1690	BC	81.8	41	KS
17	370	PR	35.4	1691	BC	42.8	1691	BC	0.8	223	PR	18.2	480	PR	5.1	179	DC	36.5	543	PR	29.1	183	PR	0.3	73	SCNC	3.1	151	PR	54	1691	BC	100	42	KS
17.1	371	PR	35.4	1692	BC	43.1	1692	BC	0.8	224	PR	18.3	481	PR	5.2	180	DC	36.7	544	PR	29.3	184	PR	0.3	74	SCNC	3.1	152	PR	54	1692	BC	0	1	PR
17.1	372	PR	35.5	1693	BC	43.4	1693	BC	0.8	225	PR	18.5	482	PR	5.5	181	DC	36.9	545	PR	29.6	185	PR	0.3	75	SCNC	3.2	153	PR	54.1	1693	BC	0	2	PR
17.2	373	PR	35.5	1694	BC	43.9	1694	BC	0.8	226	PR	18.5	483	PR	5.6	182	DC	37.3	546	PR	30	186	PR	0.3	76	SCNC	3.2	154	PR	54.1	1694	BC	0	3	PR
17.3	374	PR	35.6	1695	BC	44.3	1695	BC	0.8	227	PR	18.7	484	PR	5.9	183	DC	37.5	547	PR	30.7	187	PR	0.3	77	SCNC	3.2	155	PR	54.1	1695	BC	0	4	PR
17.4	375	PR	35.6	1696	BC	44.7	1696	BC	0.8	228	PR	18.9	485	PR	6.1	184	DC	37.7	548	PR	31.4	188	PR	0.3	78	SCNC	3.2	156	PR	54.1	1696	BC	0	5	PR
17.5	376	PR	35.7	1697	BC	45.1	1697	BC	0.8	229	PR	19.1	486	PR	6.3	185	DC	38.1	549	PR	32	189	PR	0.3	79	SCNC	3.3	157	PR	54.2	1697	BC	0.1	6	PR
17.6	377	PR	35.7	1698	BC	45.5	1698	BC	0.8	230	PR	19.1	487	PR	6.5	186	DC	38.5	550	PR	32.3	190	PR	0.3	80	SCNC	3.3	158	PR	54.2	1698	BC	0.1	7	PR
17.7	378	PR	35.7	1699	BC	45.9	1699	BC	0.8	231	PR	19.2	488	PR	6.7	187	DC	38.8	551	PR	32.7	191	PR	0.3	81	SCNC	3.4	159	PR	54.3	1699	BC	0.1	8	PR
17.8	379	PR	35.8	1700	BC	46.4	1700	BC	0.8	232	PR	19.3	489	PR	7	188	DC	39.1	552	PR	33.5	192	PR	0.3	82	SCNC	3.4	160	PR	54.3	1700	BC	0.1	9	PR
17.9	380	PR	35.8	1701	BC	46.9	1701	BC	0.9	233	PR	19.5	490	PR	7.2	189	DC	39.2	553	PR	34.7	193	PR	0.3	83	SCNC	3.4	161	PR	54.3	1701	BC	0.1	10	PR
18	381	PR	35.8	1702	BC	47.4	1702	BC	0.9	234	PR	19.6	491	PR	7.5	190	DC	39.6	554	PR	35.9	194	PR	0.3	84	SCNC	3.4	162	PR	54.4	1702	BC	0.1	11	PR
18	382	PR	35.9	1703	BC	47.9	1703	BC	0.9	235	PR	19.6	492	PR	7.9	191	DC	39.9	555	PR	36.6	195	PR	0.3	85	SCNC	3.5	163	PR	54.4	1703	BC	0.1	12	PR
18.1	383	PR	35.9	1704	BC	48.3	1704	BC	0.9	236	PR	19.7	493	PR	8.2	192	DC	40.2	556	PR	37	196	PR	0.3	86	SCNC	3.5	164	PR	54.4	1704	BC	0.1	13	PR
18.2	384	PR	35.9	1705	BC	48.8	1705	BC	0.9	237	PR	19.8	494	PR	8.5	193	DC	40.5	557	PR	37.7	197	PR	0.3	87	SCNC	3.6	165	PR	54.6	1705	BC	0.1	14	PR
18.2	385	PR	35.9	1706	BC	49.4	1706	BC	0.9	238	PR	19.9	495	PR	8.8	194	DC	40.8	558	PR	39.1	198	PR	0.3	88	SCNC	3.6	166	PR	54.6	1706	BC	0.1	15	PR
18.3	386	PR	36	1707	BC	49.9	1707	BC	0.9	239	PR	20	496	PR	9.1	195	DC	41.1	559	PR	41.4	199	PR	0.3	89	SCNC	3.6	167	PR	54.6	1707	BC	0.1	16	PR
18.3	387	PR	36	1708	BC	50.5	1708	BC	0.9	240	PR	20.1	497	PR	9.5	196	DC	41.4	560	PR	43.6	200	PR	0.3	90	SCNC	3.6	168	PR	54.6	1708	BC	0.2	17	PR
18.4	388	PR	36	1709	BC	51.1	1709	BC	0.9	241	PR	20.2	498	PR	9.9	197	DC	41.6	561	PR	44.4	201	PR	0.3	91	SCNC	3.7	169	PR	54.7	1709	BC	0.2	18	PR
18.6	389	PR	36	1710	BC	51.8	1710	BC	0.9	242	PR	20.2	499	PR	10.4	198	DC	41.9	562	PR	45	202	PR	0.4	92	SCNC	3.7	170	PR	54.7	1710	BC	0.2	19	PR
18.7	390	PR	36.1	1711	BC	52.4	1711	BC	0.9	243	PR	20.4	500	PR	10.8	199	DC	42.2	563	PR	46.2	203	PR	0.4	93	SCNC	3.7	171	PR	54.7	1711	BC	0.2	20	PR
18.8	391	PR	36.1	1712	BC	53.1	1712	BC	0.9	244	PR	20.5	501	PR	11.3	200	DC	42.6	564	PR	48.9	204	PR	0.4	94	SCNC	3.7	172	PR	54.7	1712	BC	0.2	21	PR
18.8	392	PR	36.1	1713	BC	53.7	1713	BC	0.9	245	PR	20.6	502	PR	11.9	201	DC	43	565	PR	54.5	205	PR	0.4	95	SCNC	3.8	173	PR	54.8	1713	BC	0.2	22	PR
18.9	393	PR	36.2	1714	BC	54.4	1714	BC	0.9	246	PR	20.8	503	PR	12.4	202	DC	43.2	566	PR	59	206	PR	0.4	96	SCNC	3.8	174	PR	54.8	1714	BC	0.2	23	PR
19	394	PR	36.3	1715	BC	55.2	1715	BC	0.9	247	PR	20.9	504	PR	13	203	DC	43.3	567	PR	59.9	207	PR	0.4	97	SCNC	3.8	175	PR	54.8	1715	BC	0.2	24	PR
19.1	395	PR	36.3	1716	BC	56	1716	BC	0.9	248	PR	21.1	505	PR	13.5	204	DC	43.6	568	PR	60.8	208	PR	0.4	98	SCNC	3.8	176	PR	54.8	1716	BC	0.2	25	PR
19.1	396	PR	36.3	1717	BC	56.7	1717	BC	0.9	249	PR	21.2	506	PR	14.2	205	DC	43.8	569	PR	64.1	209	PR	0.4	99	SCNC	3.8	177	PR	54.9	1717	BC	0.2	26	PR
19.2	397	PR	36.3	1718	BC	57.5	1718	BC	0.9	250	PR	21.3	507	PR	14.8	206	DC	44.1	570	PR	72	210	PR	0.4	100	SCNC	3.9	178	PR	54.9	1718	BC	0.2	27	PR
19.3	398	PR	36.4	1719	BC	58.5	1719	BC	0.9	251	PR	21.5	508	PR	15.5	207	DC	44.3	571	PR	92.9	211	PR	0.4	101	SCNC	3.9	179	PR	54.9	1719	BC	0.3	28	PR
19.4	399	PR	36.4	1720	BC	59.5	1720	BC	1	252	PR	21.6	509	PR	16.3	208	DC	44.6	572	PR	100	212	PR	0.4	102	SCNC	3.9	180	PR	55	1720	BC	0.3	29	PR
19.6	400	PR	36.5	1721	BC	60.6	1721	BC	1	253	PR	21.7	510	PR	17.2	209	DC	44.9	573	PR	0	1	SCNC	0.4	103	SCNC	4	181	PR	55	1721	BC	0.3	30	PR
19.7	401	PR	36.5	1722	BC	61.8	1722	BC	1	254	PR	21.8	511	PR	18.1	210	DC	45.2	574	PR	0	2	SCNC	0.4	104	SCNC	4	182	PR	55.1	1722	BC	0.3	31	PR
20	402	PR	36.6	1723	BC	63.1	1723	BC	1	255	PR	22	512	PR	19	211	DC	45.8	575	PR	0	3	SCNC	0.4	105	SCNC	4.1	183	PR	55.1	1723	BC	0.3	32	PR
20.1	403	PR	36.7	1724	BC	64.6	1724	BC	1	256	PR	22	513	PR	20.1	212	DC	46.2	576	PR	0	4	SCNC	0.4	106	SCNC	4.1	184	PR	55.2	1724	BC	0.3	33	PR
20.2	404	PR	36.7	1725	BC	66.2	1725	BC	1	257	PR	22.1	514	PR	21.1	213	DC	46.6	577	PR	0	5	SCNC	0.4	107	SCNC	4.1	185	PR	55.2	1725	BC	0.3	34	PR
20.3	405	PR	36.8	1726	BC	67.8	1726	BC	1	258	PR	22.1	515	PR	22.3	214	DC	47	578	PR	0	6	SCNC	0.4	108	SCNC	4.2	186	PR	55.2	1726	BC	0.3	35	PR
20.4	406	PR	36.8	1727	BC	69.7	1727	BC	1	259	PR	22.3	516	PR	23.4	215	DC	47.2	579	PR	0	7	SCNC	0.5	109	SCNC	4.2	187	PR	55.3	1727	BC	0.3	36	PR
20.4	407	PR	36.8	1728	BC	71.9	1728	BC	1	260	PR	22.5	517	PR	24.8	216	DC	47.6	580	PR	0	8	SCNC	0.5	110	SCNC	4.2	188	PR	55.3	1728	BC	0.3	37	PR
20.7	408	PR	36.8	1729	BC	100	1729	BC	1	261	PR	22.7	518	PR	26.4	217	DC	48.1	581	PR	0	9	SCNC	0.5	111	SCNC	4.3	189	PR	55.3	1729	BC	0.3	38	PR
20.7	409	PR	36.9	1730	BC	0	1	DC	1	262	PR	22.8	519	PR	27.9	218	DC	48.6	582	PR	0	10	SCNC	0.5	112	SCNC	4.4	190	PR	55.4	1730	BC	0.3	39	PR
20.8	410	PR	36.9	1731	BC	0	2	DC	1	263	PR	22.9	520	PR	29.6	219	DC	49.1	583	PR	0	11	SCNC	0.5	113	SCNC	4.4	191	PR	55.4	1731	BC	0.4	40	PR
20.9	411	PR	36.9	1732	BC	0	3	DC	1	264	PR	23	521	PR	31.3	220	DC	49.6	584	PR	0	12	SCNC	0.5	114	SCNC	4.4	192	PR	55.4	1732	BC	0.4	41	PR
21	412	PR	37	1733	BC	0	4	DC	1	265	PR	23.1	522	PR	33.3	221	DC	50.1	585	PR	0	13	SCNC	0.5	115	SCNC	4.4	193	PR	55.4	1733	BC	0.4	42	PR
21	413	PR	37	1734	BC	0	5	DC	1	266	PR	23.3	523	PR	35.5	222	DC	50.6	586	PR	0.1	14	SCNC	0.5	116	SCNC	4.4	194	PR	55.5	1734	BC	0.4	43	PR
21.2	414	PR	37	1735	BC	0	6	DC	1	267	PR	23.4	524	PR	37.9	223	DC	51.1	587	PR	0.1	15	SCNC	0.5	117	SCNC	4.5	195	PR	55.5	1735	BC	0.4	44	PR
21.3	415	PR	37.1	1736	BC	0	7	DC	1	268	PR	23.5	525	PR	40.7	224	DC	51.4	588	PR	0.1	16	SCNC	0.5	118	SCNC	4.5	196	PR	55.5	1736	BC	0.4	45	PR
21.5	416	PR	37.1	1737	BC	0	8	DC	1.1	269	PR	23.6	526	PR	43.9	225	DC	51.9	589	PR	0.1	17	SCNC	0.5	119	SCNC	4.5	197	PR	55.6	1737	BC	0.4	46	PR
21.5	417	PR	37.1	1738	BC	0	9	DC	1.1	270	PR	23.8	527	PR	47.5	226	DC	52.3	590	PR	0.1	18	SCNC	0.5	120	SCNC	4.6	198	PR	55.6	1738	BC	0.4	47	PR
21.6	418	PR	37.2	1739	BC	0	10	DC	1.1	271	PR	24.1	528	PR	51.8	227	DC	52.7	591	PR	0.1	19	SCNC	0.5	121	SCNC	4.6	199	PR	55.6	1739	BC	0.4	48	PR
22.2	419	PR	37.2	1740	BC	0	11	DC	1.1	272	PR	24.1	529	PR	56.8	228	DC	53.2	592	PR	0.1	20	SCNC	0.5	122	SCNC	4.6	200	PR	55.7	1740	BC	0.4	49	PR
22.2	420	PR	37.2	1741	BC	0	12	DC	1.1	273	PR	24.3	530	PR	62.8	229	DC	53.5	593	PR	0.1	21	SCNC	0.5	123	SCNC	4.7	201	PR	55.7	1741	BC	0.4	50	PR
22.2	421	PR	37.3	1742	BC	0	13	DC	1.1	274	PR	24.4	531	PR	69.5	230	DC	54	594	PR	0.1	22	SCNC	0.5	124	SCNC	4.7	202	PR	55.7	1742	BC	0.4	51	PR
22.3	422	PR	37.3	1743	BC	0.1	14	DC	1.1	275	PR	24.5	532	PR	77.7	231	DC	54.4	595	PR	0.1	23	SCNC	0.5	125	SCNC	4.7	203	PR	55.7	1743	BC	0.5	52	PR
22.4	423	PR	37.3	1744	BC	0.1	15	DC	1.1	276	PR	24.5	533	PR	88.1	232	DC	54.8	596	PR	0.1	24	SCNC	0.6	126	SCNC	4.7	204	PR	55.8	1744	BC	0.5	53	PR
22.5	424	PR	37.4	1745	BC	0.1	16	DC	1.1	277	PR	24.7	534	PR	100	233	DC	55.3	597	PR	0.1	25	SCNC	0.6	127	SCNC	4.8	205	PR	55.8	1745	BC	0.5	54	PR
22.7	425	PR	37.4	1746	BC	0.1	17	DC	1.1	278	PR	24.8	535	PR	0.3	1	KS	55.8	598	PR	0.1	26	SCNC	0.6	128	SCNC	4.8	206	PR	55.8	1746	BC	0.5	55	PR
23.1	426	PR	37.5	1747	BC	0.1	18	DC	1.1	279	PR	25	536	PR	0.3	2	KS	56.3	599	PR	0.1	27	SCNC	0.6	129	SCNC	4.8	207	PR	55.9	1747	BC	0.5	56	PR
23.2	427	PR	37.5	1748	BC	0.1	19	DC	1.1	280	PR	25	537	PR	0.7	3	KS	56.6	600	PR	0.1	28	SCNC	0.6	130	SCNC	4.9	208	PR	55.9	1748	BC	0.5	57	PR
23.3	428	PR	37.5	1749	BC	0.1	20	DC	1.1	281	PR	25.1	538	PR	0.7	4	KS	57	601	PR	0.1	29	SCNC	0.6	131	SCNC	4.9	209	PR	56	1749	BC	0.5	58	PR
23.4	429	PR	37.6	1750	BC	0.1	21	DC	1.1	282	PR	25.3	539	PR	0.8	5	KS	57.4	602	PR	0.1	30	SCNC	0.6	132	SCNC	5	210	PR	56	1750	BC	0.5	59	PR
23.5	430	PR	37.6	1751	BC	0.1	22	DC	1.2	283	PR	25.5	540	PR	0.8	6	KS	57.9	603	PR	0.1	31	SCNC	0.6	133	SCNC	5	211	PR	56	1751	BC	0.5	60	PR
23.6	431	PR	37.7	1752	BC	0.1	23	DC	1.2	284	PR	25.8	541	PR	0.9	7	KS	58.4	604	PR	0.1	32	SCNC	0.6	134	SCNC	5.1	212	PR	56.1	1752	BC	0.5	61	PR
23.6	432	PR	37.7	1753	BC	0.1	24	DC	1.2	285	PR	25.9	542	PR	1.2	8	KS	58.7	605	PR	0.1	33	SCNC	0.6	135	SCNC	5.1	213	PR	56.1	1753	BC	0.6	62	PR
23.8	433	PR	37.7	1754	BC	0.1	25	DC	1.2	286	PR	26	543	PR	1.2	9	KS	59.2	606	PR	0.1	34	SCNC	0.6	136	SCNC	5.1	214	PR	56.1	1754	BC	0.6	63	PR
24.1	434	PR	37.7	1755	BC	0.1	26	DC	1.2	287	PR	26.1	544	PR	1.3	10	KS	59.6	607	PR	0.1	35	SCNC	0.6	137	SCNC	5.2	215	PR	56.2	1755	BC	0.6	64	PR
24.2	435	PR	37.8	1756	BC	0.1	27	DC	1.2	288	PR	26.2	545	PR	1.3	11	KS	60.3	608	PR	0.1	36	SCNC	0.6	138	SCNC	5.2	216	PR	56.2	1756	BC	0.6	65	PR
24.3	436	PR	37.8	1757	BC	0.1	28	DC	1.2	289	PR	26.4	546	PR	1.4	12	KS	60.8	609	PR	0.1	37	SCNC	0.6	139	SCNC	5.2	217	PR	56.2	1757	BC	0.6	66	PR
24.5	437	PR	37.8	1758	BC	0.2	29	DC	1.2	290	PR	26.6	547	PR	1.4	13	KS	61.2	610	PR	0.2	38	SCNC	0.6	140	SCNC	5.3	218	PR	56.2	1758	BC	0.6	67	PR
24.6	438	PR	37.9	1759	BC	0.2	30	DC	1.2	291	PR	26.7	548	PR	1.5	14	KS	61.6	611	PR	0.2	39	SCNC	0.6	141	SCNC	5.3	219	PR	56.3	1759	BC	0.6	68	PR
24.7	439	PR	37.9	1760	BC	0.2	31	DC	1.2	292	PR	27	549	PR	2	15	KS	61.9	612	PR	0.2	40	SCNC	0.6	142	SCNC	5.4	220	PR	56.3	1760	BC	0.6	69	PR
24.8	440	PR	38	1761	BC	0.2	32	DC	1.2	293	PR	27.1	550	PR	2.1	16	KS	62.3	613	PR	0.2	41	SCNC	0.6	143	SCNC	5.4	221	PR	56.3	1761	BC	0.6	70	PR
25	441	PR	38	1762	BC	0.2	33	DC	1.3	294	PR	27.4	551	PR	2.8	17	KS	62.6	614	PR	0.2	42	SCNC	0.6	144	SCNC	5.4	222	PR	56.3	1762	BC	0.6	71	PR
25.2	442	PR	38.1	1763	BC	0.2	34	DC	1.3	295	PR	27.5	552	PR	3	18	KS	62.9	615	PR	0.2	43	SCNC	0.6	145	SCNC	5.5	223	PR	56.4	1763	BC	0.6	72	PR
25.3	443	PR	38.1	1764	BC	0.2	35	DC	1.3	296	PR	27.6	553	PR	3.6	19	KS	63.5	616	PR	0.2	44	SCNC	0.6	146	SCNC	5.5	224	PR	56.4	1764	BC	0.7	73	PR
25.7	444	PR	38.2	1765	BC	0.2	36	DC	1.3	297	PR	27.8	554	PR	4.5	20	KS	64	617	PR	0.2	45	SCNC	0.6	147	SCNC	5.5	225	PR	56.4	1765	BC	0.7	74	PR
25.7	445	PR	38.2	1766	BC	0.3	37	DC	1.3	298	PR	27.9	555	PR	4.9	21	KS	64.4	618	PR	0.2	46	SCNC	0.6	148	SCNC	5.6	226	PR	56.5	1766	BC	0.7	75	PR
26	446	PR	38.3	1767	BC	0.3	38	DC	1.3	299	PR	28.1	556	PR	5.4	22	KS	65.1	619	PR	0.2	47	SCNC	0.6	149	SCNC	5.6	227	PR	56.5	1767	BC	0.7	76	PR
26.2	447	PR	38.3	1768	BC	0.3	39	DC	1.3	300	PR	28.2	557	PR	5.9	23	KS	65.7	620	PR	0.2	48	SCNC	0.7	150	SCNC	5.6	228	PR	56.6	1768	BC	0.7	77	PR
26.4	448	PR	38.3	1769	BC	0.3	40	DC	1.3	301	PR	28.4	558	PR	6.4	24	KS	66.1	621	PR	0.2	49	SCNC	0.7	151	SCNC	5.7	229	PR	56.6	1769	BC	0.7	78	PR
26.7	449	PR	38.4	1770	BC	0.4	41	DC	1.3	302	PR	28.5	559	PR	7.4	25	KS	66.5	622	PR	0.2	50	SCNC	0.7	152	SCNC	5.7	230	PR	56.6	1770	BC	0.7	79	PR
27.2	450	PR	38.5	1771	BC	0.4	42	DC	1.3	303	PR	28.8	560	PR	8.5	26	KS	67.2	623	PR	0.2	51	SCNC	0.7	153	SCNC	5.8	231	PR	56.7	1771	BC	0.7	80	PR
27.2	451	PR	38.5	1772	BC	0.4	43	DC	1.3	304	PR	29	561	PR	9.4	27	KS	67.6	624	PR	0.3	52	SCNC	0.7	154	SCNC	5.8	232	PR	56.7	1772	BC	0.7	81	PR
27.3	452	PR	38.6	1773	BC	0.4	44	DC	1.3	305	PR	29.1	562	PR	10.5	28	KS	68	625	PR	0.3	53	SCNC	0.7	155	SCNC	5.8	233	PR	56.7	1773	BC	0.7	82	PR
27.4	453	PR	38.6	1774	BC	0.5	45	DC	1.3	306	PR	29.3	563	PR	11.2	29	KS	68.7	626	PR	0.3	54	SCNC	0.7	156	SCNC	5.9	234	PR	56.8	1774	BC	0.8	83	PR
27.6	454	PR	38.7	1775	BC	0.5	46	DC	1.3	307	PR	29.4	564	PR	12.4	30	KS	69.5	627	PR	0.3	55	SCNC	0.7	157	SCNC	5.9	235	PR	56.8	1775	BC	0.8	84	PR
27.8	455	PR	38.8	1776	BC	0.5	47	DC	1.4	308	PR	29.7	565	PR	13.9	31	KS	70.2	628	PR	0.3	56	SCNC	0.7	158	SCNC	5.9	236	PR	56.8	1776	BC	0.8	85	PR
28	456	PR	38.9	1777	BC	0.6	48	DC	1.4	309	PR	29.8	566	PR	15.9	32	KS	70.8	629	PR	0.3	57	SCNC	0.7	159	SCNC	6	237	PR	56.9	1777	BC	0.8	86	PR
28.2	457	PR	38.9	1778	BC	0.6	49	DC	1.4	310	PR	29.9	567	PR	17.3	33	KS	71.4	630	PR	0.3	58	SCNC	0.7	160	SCNC	6	238	PR	56.9	1778	BC	0.8	87	PR
28.4	458	PR	39	1779	BC	0.7	50	DC	1.4	311	PR	30.1	568	PR	19	34	KS	72.1	631	PR	0.3	59	SCNC	0.7	161	SCNC	6.1	239	PR	57	1779	BC	0.8	88	PR
28.5	459	PR	39	1780	BC	0.7	51	DC	1.4	312	PR	30.2	569	PR	20.6	35	KS	72.7	632	PR	0.3	60	SCNC	0.7	162	SCNC	6.1	240	PR	57	1780	BC	0.8	89	PR
28.6	460	PR	39	1781	BC	0.8	52	DC	1.4	313	PR	30.4	570	PR	22.4	36	KS	73	633	PR	0.3	61	SCNC	0.7	163	SCNC	6.1	241	PR	57	1781	BC	0.8	90	PR
29.4	461	PR	39	1782	BC	0.8	53	DC	1.4	314	PR	30.6	571	PR	24.6	37	KS	73.4	634	PR	0.3	62	SCNC	0.7	164	SCNC	6.2	242	PR	57	1782	BC	0.8	91	PR
29.6	462	PR	39.1	1783	BC	0.9	54	DC	1.4	315	PR	30.9	572	PR	27.1	38	KS	73.8	635	PR	0.3	63	SCNC	0.7	165	SCNC	6.2	243	PR	57.1	1783	BC	0.8	92	PR
29.7	463	PR	39.2	1784	BC	1	55	DC	1.4	316	PR	31.1	573	PR	29.2	39	KS	74.3	636	PR	0.3	64	SCNC	0.7	166	SCNC	6.2	244	PR	57.2	1784	BC	0.9	93	PR
29.8	464	PR	39.2	1785	BC	1.1	56	DC	1.4	317	PR	31.4	574	PR	32.8	40	KS	75	637	PR	0.4	65	SCNC	0.7	167	SCNC	6.3	245	PR	57.2	1785	BC	0.9	94	PR
29.9	465	PR	39.3	1786	BC	1.1	57	DC	1.4	318	PR	31.6	575	PR	37.5	41	KS	75.6	638	PR	0.4	66	SCNC	0.7	168	SCNC	6.3	246	PR	57.3	1786	BC	0.9	95	PR
30.2	466	PR	39.3	1787	BC	1.2	58	DC	1.4	319	PR	31.8	576	PR	42.6	42	KS	76.4	639	PR	0.4	67	SCNC	0.7	169	SCNC	6.3	247	PR	57.3	1787	BC	0.9	96	PR
30.5	467	PR	39.3	1788	BC	1.3	59	DC	1.4	320	PR	32.1	577	PR	48.7	43	KS	76.9	640	PR	0.4	68	SCNC	0.7	170	SCNC	6.4	248	PR	57.4	1788	BC	0.9	97	PR
30.7	468	PR	39.4	1789	BC	1.4	60	DC	1.5	321	PR	32.4	578	PR	56.1	44	KS	77.5	641	PR	0.4	69	SCNC	0.7	171	SCNC	6.4	249	PR	57.5	1789	BC	0.9	98	PR
30.8	469	PR	39.4	1790	BC	1.6	61	DC	1.5	322	PR	32.6	579	PR	64.5	45	KS	77.9	642	PR	0.4	70	SCNC	0.8	172	SCNC	6.5	250	PR	57.6	1790	BC	0.9	99	PR
31.1	470	PR	39.8	1791	BC	1.7	62	DC	1.5	323	PR	32.8	580	PR	74.8	46	KS	78.1	643	PR	0.4	71	SCNC	0.8	173	SCNC	6.6	251	PR	58.1	1791	BC	0.9	100	PR
31.4	471	PR	39.8	1792	BC	1.9	63	DC	1.5	324	PR	33	581	PR	87	47	KS	78.7	644	PR	0.4	72	SCNC	0.8	174	SCNC	6.6	252	PR	58.2	1792	BC	0.9	101	PR
31.7	472	PR	39.9	1793	BC	2.1	64	DC	1.5	325	PR	33.3	582	PR	100	48	KS	79	645	PR	0.4	73	SCNC	0.8	175	SCNC	6.8	253	PR	58.3	1793	BC	1	102	PR
32.1	473	PR	40	1794	BC	2.3	65	DC	1.5	326	PR	33.6	583	PR	0	1	PR	79.8	646	PR	0.4	74	SCNC	0.8	176	SCNC	6.8	254	PR	58.3	1794	BC	1	103	PR
32.4	474	PR	40	1795	BC	2.5	66	DC	1.5	327	PR	33.9	584	PR	0	2	PR	80.5	647	PR	0.4	75	SCNC	0.8	177	SCNC	6.9	255	PR	58.4	1795	BC	1	104	PR
33.2	475	PR	40	1796	BC	2.7	67	DC	1.5	328	PR	34.1	585	PR	0	3	PR	81.5	648	PR	0.4	76	SCNC	0.8	178	SCNC	6.9	256	PR	58.4	1796	BC	1	105	PR
33.3	476	PR	40.1	1797	BC	3	68	DC	1.5	329	PR	34.3	586	PR	0	4	PR	82.8	649	PR	0.4	77	SCNC	0.8	179	SCNC	7	257	PR	58.4	1797	BC	1	106	PR
33.5	477	PR	40.1	1798	BC	3.3	69	DC	1.5	330	PR	34.5	587	PR	0	5	PR	83.9	650	PR	0.4	78	SCNC	0.8	180	SCNC	7	258	PR	58.5	1798	BC	1	107	PR
33.7	478	PR	40.2	1799	BC	3.6	70	DC	1.6	331	PR	34.8	588	PR	0	6	PR	84.6	651	PR	0.4	79	SCNC	0.8	181	SCNC	7.1	259	PR	58.6	1799	BC	1	108	PR
33.8	479	PR	40.3	1800	BC	4.1	71	DC	1.6	332	PR	34.9	589	PR	0	7	PR	85	652	PR	0.4	80	SCNC	0.8	182	SCNC	7.1	260	PR	58.6	1800	BC	1	109	PR
34	480	PR	40.3	1801	BC	4.6	72	DC	1.6	333	PR	35.1	590	PR	0	8	PR	85.1	653	PR	0.4	81	SCNC	0.8	183	SCNC	7.2	261	PR	58.6	1801	BC	1	110	PR
34.1	481	PR	40.4	1802	BC	5.1	73	DC	1.6	334	PR	35.4	591	PR	0	9	PR	85.5	654	PR	0.5	82	SCNC	0.9	184	SCNC	7.3	262	PR	58.7	1802	BC	1	111	PR
34.2	482	PR	40.4	1803	BC	5.7	74	DC	1.6	335	PR	35.6	592	PR	0	10	PR	85.9	655	PR	0.5	83	SCNC	0.9	185	SCNC	7.3	263	PR	58.7	1803	BC	1.1	112	PR
35.1	483	PR	40.4	1804	BC	6.4	75	DC	1.6	336	PR	35.8	593	PR	0	11	PR	86.3	656	PR	0.5	84	SCNC	0.9	186	SCNC	7.4	264	PR	58.7	1804	BC	1.1	113	PR
35.8	484	PR	40.5	1805	BC	7.3	76	DC	1.6	337	PR	36.1	594	PR	0.1	12	PR	86.8	657	PR	0.5	85	SCNC	0.9	187	SCNC	7.4	265	PR	58.7	1805	BC	1.1	114	PR
35.8	485	PR	40.6	1806	BC	8.2	77	DC	1.6	338	PR	36.3	595	PR	0.1	13	PR	87.6	658	PR	0.5	86	SCNC	0.9	188	SCNC	7.5	266	PR	58.8	1806	BC	1.1	115	PR
35.9	486	PR	40.6	1807	BC	9.4	78	DC	1.7	339	PR	36.7	596	PR	0.1	14	PR	89.1	659	PR	0.5	87	SCNC	0.9	189	SCNC	7.5	267	PR	58.8	1807	BC	1.1	116	PR
36.1	487	PR	40.6	1808	BC	10.6	79	DC	1.7	340	PR	37	597	PR	0.1	15	PR	90.5	660	PR	0.5	88	SCNC	0.9	190	SCNC	7.6	268	PR	58.9	1808	BC	1.1	117	PR
36.5	488	PR	40.8	1809	BC	12.1	80	DC	1.7	341	PR	37.3	598	PR	0.1	16	PR	91.2	661	PR	0.5	89	SCNC	0.9	191	SCNC	7.6	269	PR	58.9	1809	BC	1.2	118	PR
36.6	489	PR	40.8	1810	BC	13.8	81	DC	1.7	342	PR	37.6	599	PR	0.1	17	PR	91.5	662	PR	0.5	90	SCNC	0.9	192	SCNC	7.7	270	PR	58.9	1810	BC	1.2	119	PR
36.9	490	PR	40.9	1811	BC	15.8	82	DC	1.7	343	PR	38	600	PR	0.1	18	PR	91.7	663	PR	0.5	91	SCNC	0.9	193	SCNC	7.7	271	PR	58.9	1811	BC	1.2	120	PR
37.1	491	PR	41	1812	BC	18.2	83	DC	1.7	344	PR	38.2	601	PR	0.1	19	PR	92.3	664	PR	0.5	92	SCNC	0.9	194	SCNC	7.8	272	PR	58.9	1812	BC	1.2	121	PR
37.2	492	PR	41	1813	BC	21.1	84	DC	1.8	345	PR	38.5	602	PR	0.1	20	PR	92.7	665	PR	0.5	93	SCNC	0.9	195	SCNC	7.8	273	PR	59	1813	BC	1.2	122	PR
37.3	493	PR	41	1814	BC	24.5	85	DC	1.8	346	PR	38.7	603	PR	0.1	21	PR	93.1	666	PR	0.5	94	SCNC	0.9	196	SCNC	7.9	274	PR	59	1814	BC	1.2	123	PR
37.4	494	PR	41.1	1815	BC	28.3	86	DC	1.8	347	PR	39	604	PR	0.1	22	PR	93.7	667	PR	0.5	95	SCNC	0.9	197	SCNC	7.9	275	PR	59	1815	BC	1.2	124	PR
37.6	495	PR	41.2	1816	BC	33	87	DC	1.8	348	PR	39.2	605	PR	0.1	23	PR	94.5	668	PR	0.5	96	SCNC	0.9	198	SCNC	8	276	PR	59.1	1816	BC	1.2	125	PR
37.8	496	PR	41.2	1817	BC	38.6	88	DC	1.8	349	PR	39.6	606	PR	0.1	24	PR	95.8	669	PR	0.5	97	SCNC	0.9	199	SCNC	8	277	PR	59.1	1817	BC	1.3	126	PR
38	497	PR	41.3	1818	BC	45.6	89	DC	1.8	350	PR	39.9	607	PR	0.1	25	PR	99	670	PR	0.6	98	SCNC	0.9	200	SCNC	8.1	278	PR	59.1	1818	BC	1.3	127	PR
38.2	498	PR	41.3	1819	BC	53.8	90	DC	1.9	351	PR	40.3	608	PR	0.1	26	PR	99.8	671	PR	0.6	99	SCNC	0.9	201	SCNC	8.1	279	PR	59.2	1819	BC	1.3	128	PR
38.3	499	PR	41.4	1820	BC	64.5	91	DC	1.9	352	PR	40.8	609	PR	0.1	27	PR	100	672	PR	0.6	100	SCNC	0.9	202	SCNC	8.2	280	PR	59.2	1820	BC	1.3	129	PR
38.7	500	PR	41.4	1821	BC	79.2	92	DC	1.9	353	PR	41	610	PR	0.1	28	PR	0	1	SCNC	0.6	101	SCNC	0.9	203	SCNC	8.2	281	PR	59.2	1821	BC	1.3	130	PR
39	501	PR	41.5	1822	BC	100	93	DC	1.9	354	PR	41.5	611	PR	0.2	29	PR	0	2	SCNC	0.6	102	SCNC	0.9	204	SCNC	8.3	282	PR	59.3	1822	BC	1.3	131	PR
39.3	502	PR	41.5	1823	BC	0.3	1	KS	1.9	355	PR	41.6	612	PR	0.2	30	PR	0.1	3	SCNC	0.6	103	SCNC	0.9	205	SCNC	8.3	283	PR	59.3	1823	BC	1.3	132	PR
39.5	503	PR	41.6	1824	BC	0.4	2	KS	1.9	356	PR	41.9	613	PR	0.2	31	PR	0.1	4	SCNC	0.6	104	SCNC	1	206	SCNC	8.3	284	PR	59.3	1824	BC	1.3	133	PR
39.7	504	PR	41.6	1825	BC	1.3	3	KS	2	357	PR	42.2	614	PR	0.2	32	PR	0.1	5	SCNC	0.6	105	SCNC	1	207	SCNC	8.4	285	PR	59.4	1825	BC	1.4	134	PR
39.8	505	PR	41.7	1826	BC	2.5	4	KS	2	358	PR	42.6	615	PR	0.2	33	PR	0.1	6	SCNC	0.6	106	SCNC	1	208	SCNC	8.5	286	PR	59.5	1826	BC	1.4	135	PR
40.2	506	PR	41.7	1827	BC	4.7	5	KS	2	359	PR	42.9	616	PR	0.2	34	PR	0.2	7	SCNC	0.6	107	SCNC	1	209	SCNC	8.5	287	PR	59.5	1827	BC	1.4	136	PR
40.6	507	PR	41.8	1828	BC	11.2	6	KS	2	360	PR	43.2	617	PR	0.2	35	PR	0.2	8	SCNC	0.6	108	SCNC	1	210	SCNC	8.6	288	PR	59.5	1828	BC	1.4	137	PR
40.7	508	PR	41.9	1829	BC	21.8	7	KS	2	361	PR	43.6	618	PR	0.2	36	PR	0.2	9	SCNC	0.6	109	SCNC	1	211	SCNC	8.6	289	PR	59.6	1829	BC	1.4	138	PR
40.8	509	PR	41.9	1830	BC	33	8	KS	2	362	PR	44	619	PR	0.2	37	PR	0.2	10	SCNC	0.6	110	SCNC	1	212	SCNC	8.7	290	PR	59.6	1830	BC	1.4	139	PR
40.9	510	PR	42	1831	BC	45.4	9	KS	2.1	363	PR	44.2	620	PR	0.2	38	PR	0.3	11	SCNC	0.6	111	SCNC	1	213	SCNC	8.8	291	PR	59.7	1831	BC	1.5	140	PR
41.1	511	PR	42	1832	BC	59.2	10	KS	2.1	364	PR	44.5	621	PR	0.2	39	PR	0.3	12	SCNC	0.7	112	SCNC	1	214	SCNC	8.8	292	PR	59.7	1832	BC	1.5	141	PR
41.2	512	PR	42.1	1833	BC	77.4	11	KS	2.1	365	PR	45	622	PR	0.2	40	PR	0.3	13	SCNC	0.7	113	SCNC	1	215	SCNC	8.8	293	PR	59.8	1833	BC	1.5	142	PR
41.7	513	PR	42.2	1834	BC	100	12	KS	2.1	366	PR	45.3	623	PR	0.2	41	PR	0.3	14	SCNC	0.7	114	SCNC	1	216	SCNC	8.9	294	PR	59.8	1834	BC	1.5	143	PR
41.8	514	PR	42.2	1835	BC	0	1	PR	2.1	367	PR	45.6	624	PR	0.2	42	PR	0.3	15	SCNC	0.7	115	SCNC	1	217	SCNC	9	295	PR	59.9	1835	BC	1.5	144	PR
42.4	515	PR	42.3	1836	BC	0	2	PR	2.1	368	PR	45.9	625	PR	0.2	43	PR	0.4	16	SCNC	0.7	116	SCNC	1	218	SCNC	9.1	296	PR	59.9	1836	BC	1.5	145	PR
42.8	516	PR	42.4	1837	BC	0	3	PR	2.1	369	PR	46.2	626	PR	0.2	44	PR	0.4	17	SCNC	0.7	117	SCNC	1	219	SCNC	9.1	297	PR	59.9	1837	BC	1.6	146	PR
43.1	517	PR	42.5	1838	BC	0	4	PR	2.2	370	PR	46.7	627	PR	0.2	45	PR	0.4	18	SCNC	0.7	118	SCNC	1.1	220	SCNC	9.2	298	PR	60	1838	BC	1.6	147	PR
43.4	518	PR	42.6	1839	BC	0	5	PR	2.2	371	PR	47	628	PR	0.2	46	PR	0.4	19	SCNC	0.7	119	SCNC	1.1	221	SCNC	9.2	299	PR	60	1839	BC	1.6	148	PR
43.8	519	PR	42.6	1840	BC	0	6	PR	2.2	372	PR	47.3	629	PR	0.2	47	PR	0.5	20	SCNC	0.7	120	SCNC	1.1	222	SCNC	9.3	300	PR	60	1840	BC	1.6	149	PR
44.2	520	PR	42.7	1841	BC	0	7	PR	2.2	373	PR	47.6	630	PR	0.3	48	PR	0.5	21	SCNC	0.7	121	SCNC	1.1	223	SCNC	9.3	301	PR	60.1	1841	BC	1.6	150	PR
44.4	521	PR	42.8	1842	BC	0	8	PR	2.3	374	PR	48.1	631	PR	0.3	49	PR	0.5	22	SCNC	0.7	122	SCNC	1.1	224	SCNC	9.4	302	PR	60.1	1842	BC	1.6	151	PR
44.7	522	PR	42.9	1843	BC	0	9	PR	2.3	375	PR	48.4	632	PR	0.3	50	PR	0.5	23	SCNC	0.7	123	SCNC	1.1	225	SCNC	9.5	303	PR	60.1	1843	BC	1.6	152	PR
44.9	523	PR	42.9	1844	BC	0	10	PR	2.3	376	PR	49.1	633	PR	0.3	51	PR	0.5	24	SCNC	0.7	124	SCNC	1.1	226	SCNC	9.5	304	PR	60.1	1844	BC	1.7	153	PR
45.2	524	PR	42.9	1845	BC	0	11	PR	2.3	377	PR	49.5	634	PR	0.3	52	PR	0.6	25	SCNC	0.7	125	SCNC	1.1	227	SCNC	9.6	305	PR	60.2	1845	BC	1.7	154	PR
45.6	525	PR	43.1	1846	BC	0	12	PR	2.3	378	PR	49.9	635	PR	0.3	53	PR	0.6	26	SCNC	0.7	126	SCNC	1.1	228	SCNC	9.7	306	PR	60.2	1846	BC	1.7	155	PR
45.9	526	PR	43.1	1847	BC	0	13	PR	2.3	379	PR	50.3	636	PR	0.3	54	PR	0.6	27	SCNC	0.8	127	SCNC	1.1	229	SCNC	9.8	307	PR	60.3	1847	BC	1.7	156	PR
46.1	527	PR	43.2	1848	BC	0.1	14	PR	2.4	380	PR	50.7	637	PR	0.3	55	PR	0.6	28	SCNC	0.9	128	SCNC	1.1	230	SCNC	10	308	PR	60.3	1848	BC	1.7	157	PR
46.3	528	PR	43.3	1849	BC	0.1	15	PR	2.4	381	PR	51.1	638	PR	0.3	56	PR	0.7	29	SCNC	0.9	129	SCNC	1.1	231	SCNC	10.1	309	PR	60.4	1849	BC	1.7	158	PR
46.8	529	PR	43.4	1850	BC	0.1	16	PR	2.4	382	PR	51.5	639	PR	0.3	57	PR	0.7	30	SCNC	0.9	130	SCNC	1.1	232	SCNC	10.2	310	PR	60.4	1850	BC	1.8	159	PR
47	530	PR	43.4	1851	BC	0.1	17	PR	2.4	383	PR	52	640	PR	0.3	58	PR	0.7	31	SCNC	0.9	131	SCNC	1.1	233	SCNC	10.3	311	PR	60.5	1851	BC	1.8	160	PR
47.3	531	PR	43.5	1852	BC	0.1	18	PR	2.5	384	PR	52.4	641	PR	0.3	59	PR	0.7	32	SCNC	0.9	132	SCNC	1.1	234	SCNC	10.3	312	PR	60.5	1852	BC	1.8	161	PR
47.4	532	PR	43.6	1853	BC	0.1	19	PR	2.5	385	PR	52.7	642	PR	0.3	60	PR	0.8	33	SCNC	0.9	133	SCNC	1.1	235	SCNC	10.4	313	PR	60.6	1853	BC	1.8	162	PR
48	533	PR	43.6	1854	BC	0.1	20	PR	2.5	386	PR	53.2	643	PR	0.3	61	PR	0.8	34	SCNC	0.9	134	SCNC	1.1	236	SCNC	10.4	314	PR	60.6	1854	BC	1.8	163	PR
48.4	534	PR	43.7	1855	BC	0.1	21	PR	2.5	387	PR	53.5	644	PR	0.3	62	PR	0.8	35	SCNC	0.9	135	SCNC	1.2	237	SCNC	10.4	315	PR	60.6	1855	BC	1.8	164	PR
48.7	535	PR	43.7	1856	BC	0.1	22	PR	2.6	388	PR	54.1	645	PR	0.3	63	PR	0.8	36	SCNC	0.9	136	SCNC	1.2	238	SCNC	10.5	316	PR	60.7	1856	BC	1.9	165	PR
49.3	536	PR	43.8	1857	BC	0.1	23	PR	2.6	389	PR	54.7	646	PR	0.3	64	PR	0.8	37	SCNC	0.9	137	SCNC	1.2	239	SCNC	10.5	317	PR	60.7	1857	BC	1.9	166	PR
49.6	537	PR	43.9	1858	BC	0.1	24	PR	2.6	390	PR	55.3	647	PR	0.3	65	PR	0.9	38	SCNC	0.9	138	SCNC	1.2	240	SCNC	10.6	318	PR	60.7	1858	BC	1.9	167	PR
49.9	538	PR	43.9	1859	BC	0.1	25	PR	2.6	391	PR	55.7	648	PR	0.4	66	PR	0.9	39	SCNC	0.9	139	SCNC	1.2	241	SCNC	10.7	319	PR	60.8	1859	BC	1.9	168	PR
50.4	539	PR	44	1860	BC	0.1	26	PR	2.6	392	PR	56.2	649	PR	0.4	67	PR	0.9	40	SCNC	0.9	140	SCNC	1.2	242	SCNC	10.8	320	PR	60.8	1860	BC	1.9	169	PR
50.6	540	PR	44.2	1861	BC	0.1	27	PR	2.7	393	PR	56.6	650	PR	0.4	68	PR	0.9	41	SCNC	0.9	141	SCNC	1.2	243	SCNC	10.9	321	PR	60.9	1861	BC	1.9	170	PR
51.2	541	PR	44.3	1862	BC	0.1	28	PR	2.7	394	PR	57.1	651	PR	0.4	69	PR	1	42	SCNC	0.9	142	SCNC	1.2	244	SCNC	10.9	322	PR	60.9	1862	BC	2	171	PR
51.5	542	PR	44.4	1863	BC	0.1	29	PR	2.7	395	PR	57.6	652	PR	0.4	70	PR	1	43	SCNC	0.9	143	SCNC	1.2	245	SCNC	11	323	PR	60.9	1863	BC	2	172	PR
51.8	543	PR	44.5	1864	BC	0.1	30	PR	2.8	396	PR	58.1	653	PR	0.4	71	PR	1	44	SCNC	0.9	144	SCNC	1.2	246	SCNC	11.1	324	PR	61	1864	BC	2	173	PR
52.4	544	PR	44.7	1865	BC	0.1	31	PR	2.8	397	PR	58.5	654	PR	0.4	72	PR	1	45	SCNC	0.9	145	SCNC	1.2	247	SCNC	11.2	325	PR	61.1	1865	BC	2	174	PR
52.8	545	PR	44.8	1866	BC	0.1	32	PR	2.8	398	PR	59.1	655	PR	0.4	73	PR	1	46	SCNC	0.9	146	SCNC	1.2	248	SCNC	11.3	326	PR	61.1	1866	BC	2	175	PR
53.2	546	PR	44.9	1867	BC	0.1	33	PR	2.9	399	PR	59.6	656	PR	0.4	74	PR	1.1	47	SCNC	0.9	147	SCNC	1.2	249	SCNC	11.4	327	PR	61.2	1867	BC	2	176	PR
53.5	547	PR	45.1	1868	BC	0.1	34	PR	2.9	400	PR	60.1	657	PR	0.4	75	PR	1.1	48	SCNC	0.9	148	SCNC	1.2	250	SCNC	11.4	328	PR	61.2	1868	BC	2.1	177	PR
53.9	548	PR	45.1	1869	BC	0.1	35	PR	2.9	401	PR	60.7	658	PR	0.4	76	PR	1.1	49	SCNC	0.9	149	SCNC	1.2	251	SCNC	11.5	329	PR	61.2	1869	BC	2.1	178	PR
54.1	549	PR	45.2	1870	BC	0.2	36	PR	3	402	PR	61.3	659	PR	0.4	77	PR	1.1	50	SCNC	0.9	150	SCNC	1.2	252	SCNC	11.5	330	PR	61.3	1870	BC	2.1	179	PR
54.4	550	PR	45.3	1871	BC	0.2	37	PR	3	403	PR	62	660	PR	0.4	78	PR	1.2	51	SCNC	0.9	151	SCNC	1.2	253	SCNC	11.6	331	PR	61.3	1871	BC	2.1	180	PR
54.6	551	PR	45.5	1872	BC	0.2	38	PR	3	404	PR	62.7	661	PR	0.4	79	PR	1.2	52	SCNC	1	152	SCNC	1.2	254	SCNC	11.7	332	PR	61.3	1872	BC	2.1	181	PR
55.1	552	PR	45.5	1873	BC	0.2	39	PR	3	405	PR	63.1	662	PR	0.4	80	PR	1.2	53	SCNC	1	153	SCNC	1.2	255	SCNC	11.7	333	PR	61.4	1873	BC	2.1	182	PR
55.4	553	PR	45.6	1874	BC	0.2	40	PR	3.1	406	PR	63.6	663	PR	0.4	81	PR	1.2	54	SCNC	1	154	SCNC	1.4	256	SCNC	11.9	334	PR	61.4	1874	BC	2.2	183	PR
55.8	554	PR	45.8	1875	BC	0.2	41	PR	3.1	407	PR	64.1	664	PR	0.4	82	PR	1.3	55	SCNC	1	155	SCNC	1.4	257	SCNC	12	335	PR	61.4	1875	BC	2.2	184	PR
56.4	555	PR	45.9	1876	BC	0.2	42	PR	3.1	408	PR	64.7	665	PR	0.4	83	PR	1.3	56	SCNC	1	156	SCNC	1.4	258	SCNC	12.2	336	PR	61.5	1876	BC	2.2	185	PR
56.8	556	PR	46	1877	BC	0.2	43	PR	3.2	409	PR	65.3	666	PR	0.4	84	PR	1.3	57	SCNC	1	157	SCNC	1.4	259	SCNC	12.2	337	PR	61.5	1877	BC	2.2	186	PR
57	557	PR	46.2	1878	BC	0.2	44	PR	3.2	410	PR	66.1	667	PR	0.5	85	PR	1.3	58	SCNC	1	158	SCNC	1.4	260	SCNC	12.3	338	PR	61.5	1878	BC	2.3	187	PR
57.4	558	PR	46.3	1879	BC	0.2	45	PR	3.3	411	PR	66.5	668	PR	0.5	86	PR	1.3	59	SCNC	1	159	SCNC	1.4	261	SCNC	12.3	339	PR	61.6	1879	BC	2.3	188	PR
57.8	559	PR	46.4	1880	BC	0.2	46	PR	3.3	412	PR	67.1	669	PR	0.5	87	PR	1.4	60	SCNC	1	160	SCNC	1.4	262	SCNC	12.5	340	PR	61.6	1880	BC	2.3	189	PR
58.4	560	PR	46.5	1881	BC	0.2	47	PR	3.3	413	PR	67.8	670	PR	0.5	88	PR	1.4	61	SCNC	1	161	SCNC	1.4	263	SCNC	12.7	341	PR	61.6	1881	BC	2.3	190	PR
58.8	561	PR	46.6	1882	BC	0.2	48	PR	3.4	414	PR	68.3	671	PR	0.5	89	PR	1.4	62	SCNC	1.2	162	SCNC	1.4	264	SCNC	12.7	342	PR	61.7	1882	BC	2.3	191	PR
59.2	562	PR	46.7	1883	BC	0.2	49	PR	3.4	415	PR	68.9	672	PR	0.5	90	PR	1.4	63	SCNC	1.2	163	SCNC	1.4	265	SCNC	12.8	343	PR	61.8	1883	BC	2.3	192	PR
59.5	563	PR	46.9	1884	BC	0.2	50	PR	3.4	416	PR	69.4	673	PR	0.5	91	PR	1.5	64	SCNC	1.2	164	SCNC	1.4	266	SCNC	12.8	344	PR	61.8	1884	BC	2.4	193	PR
60	564	PR	47	1885	BC	0.2	51	PR	3.5	417	PR	69.8	674	PR	0.5	92	PR	1.5	65	SCNC	1.2	165	SCNC	1.4	267	SCNC	12.9	345	PR	61.9	1885	BC	2.4	194	PR
60.5	565	PR	47.2	1886	BC	0.2	52	PR	3.5	418	PR	70.2	675	PR	0.5	93	PR	1.5	66	SCNC	1.2	166	SCNC	1.4	268	SCNC	13	346	PR	62	1886	BC	2.4	195	PR
60.7	566	PR	47.4	1887	BC	0.2	53	PR	3.6	419	PR	70.8	676	PR	0.5	94	PR	1.5	67	SCNC	1.2	167	SCNC	1.4	269	SCNC	13.2	347	PR	62.1	1887	BC	2.4	196	PR
61.2	567	PR	47.4	1888	BC	0.2	54	PR	3.6	420	PR	71.4	677	PR	0.5	95	PR	1.6	68	SCNC	1.2	168	SCNC	1.4	270	SCNC	13.3	348	PR	62.1	1888	BC	2.4	197	PR
61.6	568	PR	47.5	1889	BC	0.2	55	PR	3.7	421	PR	72	678	PR	0.5	96	PR	1.6	69	SCNC	1.2	169	SCNC	1.4	271	SCNC	13.4	349	PR	62.1	1889	BC	2.5	198	PR
62	569	PR	47.6	1890	BC	0.2	56	PR	3.7	422	PR	72.9	679	PR	0.5	97	PR	1.6	70	SCNC	1.2	170	SCNC	1.4	272	SCNC	13.5	350	PR	62.1	1890	BC	2.5	199	PR
62.6	570	PR	47.8	1891	BC	0.2	57	PR	3.7	423	PR	73.4	680	PR	0.5	98	PR	1.6	71	SCNC	1.2	171	SCNC	1.4	273	SCNC	13.5	351	PR	62.2	1891	BC	2.5	200	PR
63	571	PR	48	1892	BC	0.2	58	PR	3.8	424	PR	73.9	681	PR	0.6	99	PR	1.6	72	SCNC	1.2	172	SCNC	1.4	274	SCNC	13.7	352	PR	62.2	1892	BC	2.5	201	PR
63.2	572	PR	48.1	1893	BC	0.2	59	PR	3.9	425	PR	74.6	682	PR	0.6	100	PR	1.7	73	SCNC	1.2	173	SCNC	1.4	275	SCNC	13.8	353	PR	62.3	1893	BC	2.5	202	PR
63.6	573	PR	48.3	1894	BC	0.2	60	PR	3.9	426	PR	75.3	683	PR	0.6	101	PR	1.7	74	SCNC	1.2	174	SCNC	1.4	276	SCNC	13.8	354	PR	62.3	1894	BC	2.6	203	PR
64.3	574	PR	48.4	1895	BC	0.3	61	PR	3.9	427	PR	75.8	684	PR	0.6	102	PR	1.7	75	SCNC	1.2	175	SCNC	1.4	277	SCNC	13.9	355	PR	62.4	1895	BC	2.6	204	PR
64.8	575	PR	48.6	1896	BC	0.3	62	PR	4	428	PR	76.5	685	PR	0.6	103	PR	1.7	76	SCNC	1.2	176	SCNC	1.4	278	SCNC	14	356	PR	62.4	1896	BC	2.6	205	PR
65.2	576	PR	48.7	1897	BC	0.3	63	PR	4.1	429	PR	77.1	686	PR	0.6	104	PR	1.8	77	SCNC	1.2	177	SCNC	1.4	279	SCNC	14.1	357	PR	62.5	1897	BC	2.7	206	PR
65.4	577	PR	49	1898	BC	0.3	64	PR	4.1	430	PR	77.7	687	PR	0.6	105	PR	1.8	78	SCNC	1.2	178	SCNC	1.4	280	SCNC	14.2	358	PR	62.5	1898	BC	2.7	207	PR
65.7	578	PR	49.2	1899	BC	0.3	65	PR	4.1	431	PR	78.5	688	PR	0.6	106	PR	1.8	79	SCNC	1.2	179	SCNC	1.4	281	SCNC	14.4	359	PR	62.6	1899	BC	2.7	208	PR
66	579	PR	49.4	1900	BC	0.3	66	PR	4.2	432	PR	79	689	PR	0.6	107	PR	1.8	80	SCNC	1.3	180	SCNC	1.4	282	SCNC	14.6	360	PR	62.6	1900	BC	2.7	209	PR
66.4	580	PR	49.5	1901	BC	0.3	67	PR	4.2	433	PR	79.7	690	PR	0.6	108	PR	1.8	81	SCNC	1.3	181	SCNC	1.4	283	SCNC	14.8	361	PR	62.6	1901	BC	2.7	210	PR
66.8	581	PR	49.8	1902	BC	0.3	68	PR	4.3	434	PR	80.3	691	PR	0.6	109	PR	1.9	82	SCNC	1.3	182	SCNC	1.4	284	SCNC	14.9	362	PR	62.6	1902	BC	2.7	211	PR
67.3	582	PR	50	1903	BC	0.3	69	PR	4.3	435	PR	81	692	PR	0.6	110	PR	1.9	83	SCNC	1.3	183	SCNC	1.4	285	SCNC	15	363	PR	62.7	1903	BC	2.7	212	PR
68.1	583	PR	50.3	1904	BC	0.3	70	PR	4.4	436	PR	81.6	693	PR	0.6	111	PR	1.9	84	SCNC	1.3	184	SCNC	1.5	286	SCNC	15.1	364	PR	62.7	1904	BC	2.8	213	PR
68.5	584	PR	50.6	1905	BC	0.3	71	PR	4.5	437	PR	82.2	694	PR	0.6	112	PR	1.9	85	SCNC	1.3	185	SCNC	1.5	287	SCNC	15.2	365	PR	62.8	1905	BC	2.8	214	PR
69	585	PR	100	1906	BC	0.3	72	PR	4.5	438	PR	83.1	695	PR	0.6	113	PR	2	86	SCNC	1.3	186	SCNC	1.5	288	SCNC	15.4	366	PR	62.9	1906	BC	2.8	215	PR
69.5	586	PR	0	1	DC	0.3	73	PR	4.6	439	PR	83.8	696	PR	0.6	114	PR	2	87	SCNC	1.3	187	SCNC	1.5	289	SCNC	15.5	367	PR	62.9	1907	BC	2.9	216	PR
69.9	587	PR	0	2	DC	0.3	74	PR	4.7	440	PR	84.3	697	PR	0.7	115	PR	2	88	SCNC	1.3	188	SCNC	1.6	290	SCNC	15.6	368	PR	63	1908	BC	2.9	217	PR
70.3	588	PR	0	3	DC	0.3	75	PR	4.7	441	PR	85.1	698	PR	0.7	116	PR	2	89	SCNC	1.3	189	SCNC	1.6	291	SCNC	15.7	369	PR	63	1909	BC	2.9	218	PR
70.8	589	PR	0	4	DC	0.3	76	PR	4.8	442	PR	85.6	699	PR	0.7	117	PR	2.1	90	SCNC	1.3	190	SCNC	1.6	292	SCNC	15.9	370	PR	63	1910	BC	2.9	219	PR
71	590	PR	0.1	5	DC	0.3	77	PR	4.9	443	PR	86.1	700	PR	0.7	118	PR	2.1	91	SCNC	1.3	191	SCNC	1.6	293	SCNC	16.1	371	PR	63.1	1911	BC	2.9	220	PR
71.5	591	PR	0.1	6	DC	0.4	78	PR	5	444	PR	86.7	701	PR	0.7	119	PR	2.1	92	SCNC	1.3	192	SCNC	1.6	294	SCNC	16.2	372	PR	63.1	1912	BC	2.9	221	PR
72	592	PR	0.1	7	DC	0.4	79	PR	5	445	PR	87.7	702	PR	0.7	120	PR	2.1	93	SCNC	1.3	193	SCNC	1.6	295	SCNC	16.3	373	PR	63.2	1913	BC	3	222	PR
72.5	593	PR	0.1	8	DC	0.4	80	PR	5.1	446	PR	88.6	703	PR	0.7	121	PR	2.1	94	SCNC	1.3	194	SCNC	1.6	296	SCNC	16.4	374	PR	63.2	1914	BC	3	223	PR
72.9	594	PR	0.2	9	DC	0.4	81	PR	5.2	447	PR	89.5	704	PR	0.7	122	PR	2.2	95	SCNC	1.3	195	SCNC	1.6	297	SCNC	16.5	375	PR	63.3	1915	BC	3.1	224	PR
73.3	595	PR	0.2	10	DC	0.4	82	PR	5.3	448	PR	90	705	PR	0.8	123	PR	2.2	96	SCNC	1.3	196	SCNC	1.6	298	SCNC	16.6	376	PR	63.3	1916	BC	3.1	225	PR
74	596	PR	0.2	11	DC	0.4	83	PR	5.4	449	PR	90.2	706	PR	0.8	124	PR	2.2	97	SCNC	1.3	197	SCNC	1.6	299	SCNC	16.8	377	PR	63.4	1917	BC	3.1	226	PR
74.2	597	PR	0.2	12	DC	0.4	84	PR	5.4	450	PR	90.8	707	PR	0.8	125	PR	2.2	98	SCNC	1.3	198	SCNC	1.6	300	SCNC	16.9	378	PR	63.4	1918	BC	3.1	227	PR
74.6	598	PR	0.3	13	DC	0.4	85	PR	5.6	451	PR	91.7	708	PR	0.8	126	PR	2.3	99	SCNC	1.3	199	SCNC	1.6	301	SCNC	17	379	PR	63.5	1919	BC	3.2	228	PR
75	599	PR	0.3	14	DC	0.4	86	PR	5.7	452	PR	92.8	709	PR	0.8	127	PR	2.3	100	SCNC	1.3	200	SCNC	1.6	302	SCNC	17.1	380	PR	63.5	1920	BC	3.2	229	PR
75.4	600	PR	0.3	15	DC	0.4	87	PR	5.7	453	PR	93.9	710	PR	0.8	128	PR	2.3	101	SCNC	1.3	201	SCNC	1.6	303	SCNC	17.3	381	PR	63.5	1921	BC	3.2	230	PR
75.9	601	PR	0.4	16	DC	0.4	88	PR	5.8	454	PR	94.8	711	PR	0.8	129	PR	2.3	102	SCNC	1.4	202	SCNC	1.7	304	SCNC	17.3	382	PR	63.6	1922	BC	3.3	231	PR
76.4	602	PR	0.4	17	DC	0.4	89	PR	5.9	455	PR	95.1	712	PR	0.8	130	PR	2.3	103	SCNC	1.7	203	SCNC	1.7	305	SCNC	17.5	383	PR	63.6	1923	BC	3.3	232	PR
76.8	603	PR	0.5	18	DC	0.4	90	PR	6	456	PR	95.2	713	PR	0.8	131	PR	2.4	104	SCNC	1.7	204	SCNC	1.7	306	SCNC	17.7	384	PR	63.7	1924	BC	3.4	233	PR
77.2	604	PR	0.6	19	DC	0.4	91	PR	6.1	457	PR	95.5	714	PR	0.8	132	PR	2.4	105	SCNC	1.7	205	SCNC	1.7	307	SCNC	17.8	385	PR	63.7	1925	BC	3.4	234	PR
77.6	605	PR	0.7	20	DC	0.5	92	PR	6.2	458	PR	95.9	715	PR	0.9	133	PR	2.4	106	SCNC	1.7	206	SCNC	1.7	308	SCNC	17.9	386	PR	63.8	1926	BC	3.4	235	PR
78.1	606	PR	0.8	21	DC	0.5	93	PR	6.3	459	PR	97.6	716	PR	0.9	134	PR	2.4	107	SCNC	1.7	207	SCNC	1.7	309	SCNC	18.1	387	PR	63.9	1927	BC	3.5	236	PR
78.7	607	PR	0.9	22	DC	0.5	94	PR	6.4	460	PR	99.5	717	PR	0.9	135	PR	2.5	108	SCNC	1.7	208	SCNC	1.7	310	SCNC	18.3	388	PR	64	1928	BC	3.5	237	PR
79.1	608	PR	1	23	DC	0.5	95	PR	6.6	461	PR	100	718	PR	0.9	136	PR	2.5	109	SCNC	1.7	209	SCNC	1.7	311	SCNC	18.4	389	PR	64.1	1929	BC	3.5	238	PR
79.5	609	PR	1.1	24	DC	0.5	96	PR	6.7	462	PR	0	1	SCNC	0.9	137	PR	2.5	110	SCNC	1.7	210	SCNC	1.7	312	SCNC	18.6	390	PR	64.1	1930	BC	3.6	239	PR
79.8	610	PR	1.4	25	DC	0.5	97	PR	6.8	463	PR	0	2	SCNC	0.9	138	PR	2.5	111	SCNC	1.7	211	SCNC	1.7	313	SCNC	18.7	391	PR	64.1	1931	BC	3.6	240	PR
80.2	611	PR	1.5	26	DC	0.5	98	PR	6.9	464	PR	0.1	3	SCNC	0.9	139	PR	2.6	112	SCNC	1.7	212	SCNC	1.7	314	SCNC	18.8	392	PR	64.2	1932	BC	3.7	241	PR
80.7	612	PR	1.6	27	DC	0.5	99	PR	7.1	465	PR	0.1	4	SCNC	0.9	140	PR	2.6	113	SCNC	1.7	213	SCNC	1.7	315	SCNC	19	393	PR	64.3	1933	BC	3.7	242	PR
81.2	613	PR	1.8	28	DC	0.5	100	PR	7.2	466	PR	0.1	5	SCNC	0.9	141	PR	2.6	114	SCNC	1.7	214	SCNC	1.7	316	SCNC	19.2	394	PR	64.4	1934	BC	3.7	243	PR
81.6	614	PR	2	29	DC	0.5	101	PR	7.3	467	PR	0.1	6	SCNC	1	142	PR	2.6	115	SCNC	1.7	215	SCNC	1.7	317	SCNC	19.5	395	PR	64.4	1935	BC	3.7	244	PR
81.7	615	PR	2.2	30	DC	0.5	102	PR	7.4	468	PR	0.2	7	SCNC	1	143	PR	2.6	116	SCNC	1.7	216	SCNC	1.7	318	SCNC	19.6	396	PR	64.5	1936	BC	3.7	245	PR
82.2	616	PR	2.4	31	DC	0.5	103	PR	7.6	469	PR	0.2	8	SCNC	1	144	PR	2.7	117	SCNC	1.7	217	SCNC	1.7	319	SCNC	19.8	397	PR	64.6	1937	BC	3.8	246	PR
82.7	617	PR	2.7	32	DC	0.5	104	PR	7.8	470	PR	0.2	9	SCNC	1	145	PR	2.7	118	SCNC	1.7	218	SCNC	1.7	320	SCNC	19.9	398	PR	64.6	1938	BC	3.8	247	PR
83	618	PR	3.3	33	DC	0.6	105	PR	8	471	PR	0.2	10	SCNC	1	146	PR	2.7	119	SCNC	1.7	219	SCNC	1.7	321	SCNC	20	399	PR	64.7	1939	BC	3.9	248	PR
83.4	619	PR	3.7	34	DC	0.6	106	PR	8.2	472	PR	0.2	11	SCNC	1	147	PR	2.7	120	SCNC	1.7	220	SCNC	1.7	322	SCNC	20.1	400	PR	64.8	1940	BC	3.9	249	PR
83.7	620	PR	4	35	DC	0.6	107	PR	8.4	473	PR	0.3	12	SCNC	1	148	PR	2.8	121	SCNC	1.7	221	SCNC	1.7	323	SCNC	20.3	401	PR	64.9	1941	BC	3.9	250	PR
84	621	PR	4.6	36	DC	0.6	108	PR	8.5	474	PR	0.3	13	SCNC	1	149	PR	2.8	122	SCNC	1.7	222	SCNC	1.7	324	SCNC	20.5	402	PR	64.9	1942	BC	4	251	PR
84.3	622	PR	5.2	37	DC	0.6	109	PR	8.7	475	PR	0.3	14	SCNC	1	150	PR	2.8	123	SCNC	1.7	223	SCNC	1.7	325	SCNC	20.6	403	PR	65.1	1943	BC	4	252	PR
84.6	623	PR	6.1	38	DC	0.6	110	PR	9	476	PR	0.3	15	SCNC	1	151	PR	2.8	124	SCNC	1.7	224	SCNC	1.7	326	SCNC	20.8	404	PR	65.2	1944	BC	4	253	PR
85	624	PR	6.7	39	DC	0.6	111	PR	9.2	477	PR	0.3	16	SCNC	1.1	152	PR	2.9	125	SCNC	1.7	225	SCNC	1.7	327	SCNC	21	405	PR	65.2	1945	BC	4.1	254	PR
85.3	625	PR	7.5	40	DC	0.6	112	PR	9.4	478	PR	0.4	17	SCNC	1.1	153	PR	2.9	126	SCNC	1.7	226	SCNC	1.7	328	SCNC	21.1	406	PR	65.4	1946	BC	4.1	255	PR
85.5	626	PR	8.6	41	DC	0.6	113	PR	9.6	479	PR	0.4	18	SCNC	1.1	154	PR	2.9	127	SCNC	1.7	227	SCNC	1.7	329	SCNC	21.2	407	PR	65.5	1947	BC	4.2	256	PR
86	627	PR	9.6	42	DC	0.6	114	PR	9.9	480	PR	0.4	19	SCNC	1.1	155	PR	2.9	128	SCNC	1.7	228	SCNC	1.9	330	SCNC	21.4	408	PR	65.6	1948	BC	4.2	257	PR
86.2	628	PR	11	43	DC	0.6	115	PR	10.2	481	PR	0.4	20	SCNC	1.1	156	PR	2.9	129	SCNC	1.8	229	SCNC	1.9	331	SCNC	21.5	409	PR	65.6	1949	BC	4.2	258	PR
86.6	629	PR	12.4	44	DC	0.7	116	PR	10.5	482	PR	0.5	21	SCNC	1.1	157	PR	3	130	SCNC	1.8	230	SCNC	1.9	332	SCNC	21.7	410	PR	65.7	1950	BC	4.3	259	PR
86.8	630	PR	14	45	DC	0.7	117	PR	10.7	483	PR	0.5	22	SCNC	1.1	158	PR	3	131	SCNC	1.8	231	SCNC	1.9	333	SCNC	21.8	411	PR	66	1951	BC	4.3	260	PR
87	631	PR	16.6	46	DC	0.7	118	PR	11.1	484	PR	0.5	23	SCNC	1.2	159	PR	3	132	SCNC	1.8	232	SCNC	2	334	SCNC	22	412	PR	66.1	1952	BC	4.3	261	PR
87.2	632	PR	19.4	47	DC	0.7	119	PR	11.4	485	PR	0.5	24	SCNC	1.2	160	PR	3	133	SCNC	1.8	233	SCNC	2	335	SCNC	22.1	413	PR	66.2	1953	BC	4.3	262	PR
87.4	633	PR	23	48	DC	0.7	120	PR	11.7	486	PR	0.5	25	SCNC	1.2	161	PR	3.1	134	SCNC	1.8	234	SCNC	2	336	SCNC	22.3	414	PR	66.3	1954	BC	4.4	263	PR
87.6	634	PR	27.2	49	DC	0.7	121	PR	12.1	487	PR	0.6	26	SCNC	1.2	162	PR	3.1	135	SCNC	1.8	235	SCNC	2	337	SCNC	22.4	415	PR	66.7	1955	BC	4.4	264	PR
88.2	635	PR	32.5	50	DC	0.7	122	PR	12.5	488	PR	0.6	27	SCNC	1.2	163	PR	3.1	136	SCNC	1.8	236	SCNC	2	338	SCNC	22.6	416	PR	67	1956	BC	4.4	265	PR
88.6	636	PR	39.4	51	DC	0.7	123	PR	12.9	489	PR	0.6	28	SCNC	1.2	164	PR	3.1	137	SCNC	1.8	237	SCNC	2	339	SCNC	22.7	417	PR	67.2	1957	BC	4.5	266	PR
88.9	637	PR	48.5	52	DC	0.7	124	PR	13.4	490	PR	0.6	29	SCNC	1.3	165	PR	3.1	138	SCNC	1.8	238	SCNC	2	340	SCNC	22.9	418	PR	67.7	1958	BC	4.5	267	PR
89.5	638	PR	63	53	DC	0.7	125	PR	13.9	491	PR	0.6	30	SCNC	1.3	166	PR	3.2	139	SCNC	1.8	239	SCNC	2	341	SCNC	23.1	419	PR	68.4	1959	BC	4.6	268	PR
89.8	639	PR	83.1	54	DC	0.7	126	PR	14.5	492	PR	0.7	31	SCNC	1.3	167	PR	3.2	140	SCNC	1.8	240	SCNC	2	342	SCNC	23.2	420	PR	69.4	1960	BC	4.7	269	PR
90.3	640	PR	100	55	DC	0.8	127	PR	15.1	493	PR	0.7	32	SCNC	1.3	168	PR	3.2	141	SCNC	1.8	241	SCNC	2	343	SCNC	23.5	421	PR	100	1961	BC	4.8	270	PR
90.7	641	PR	0.4	1	KS	0.8	128	PR	15.6	494	PR	0.7	33	SCNC	1.3	169	PR	3.2	142	SCNC	1.8	242	SCNC	2	344	SCNC	23.7	422	PR	0	1	DC	4.8	271	PR
91.4	642	PR	0.6	2	KS	0.8	129	PR	16.2	495	PR	0.7	34	SCNC	1.3	170	PR	3.3	143	SCNC	1.8	243	SCNC	2	345	SCNC	23.9	423	PR	0	2	DC	4.9	272	PR
91.9	643	PR	0.9	3	KS	0.8	130	PR	17	496	PR	0.8	35	SCNC	1.4	171	PR	3.3	144	SCNC	1.8	244	SCNC	2	346	SCNC	24.1	424	PR	0.1	3	DC	4.9	273	PR
92.5	644	PR	1.1	4	KS	0.8	131	PR	17.8	497	PR	0.8	36	SCNC	1.4	172	PR	3.3	145	SCNC	1.8	245	SCNC	2	347	SCNC	24.2	425	PR	0.2	4	DC	5	274	PR
93	645	PR	1.2	5	KS	0.8	132	PR	18.6	498	PR	0.8	37	SCNC	1.4	173	PR	3.3	146	SCNC	1.8	246	SCNC	2	348	SCNC	24.5	426	PR	0.3	5	DC	5	275	PR
93.7	646	PR	3.3	6	KS	0.9	133	PR	19.7	499	PR	0.8	38	SCNC	1.4	174	PR	3.4	147	SCNC	1.8	247	SCNC	2	349	SCNC	24.8	427	PR	0.5	6	DC	5	276	PR
94.2	647	PR	6.9	7	KS	0.9	134	PR	21	500	PR	0.8	39	SCNC	1.4	175	PR	3.4	148	SCNC	1.8	248	SCNC	2	350	SCNC	25	428	PR	1.1	7	DC	5.1	277	PR
94.6	648	PR	13.4	8	KS	0.9	135	PR	22.5	501	PR	0.9	40	SCNC	1.4	176	PR	3.4	149	SCNC	1.8	249	SCNC	2	351	SCNC	25.3	429	PR	1.6	8	DC	5.2	278	PR
95	649	PR	23.6	9	KS	0.9	136	PR	23.9	502	PR	0.9	41	SCNC	1.4	177	PR	3.4	150	SCNC	1.8	250	SCNC	2	352	SCNC	25.5	430	PR	2.5	9	DC	5.2	279	PR
95.8	650	PR	37	10	KS	0.9	137	PR	25.6	503	PR	0.9	42	SCNC	1.4	178	PR	3.4	151	SCNC	1.9	251	SCNC	2	353	SCNC	25.7	431	PR	4.2	10	DC	5.3	280	PR
96.4	651	PR	57	11	KS	0.9	138	PR	27.4	504	PR	0.9	43	SCNC	1.5	179	PR	3.5	152	SCNC	1.9	252	SCNC	2	354	SCNC	25.9	432	PR	7	11	DC	5.3	281	PR
96.9	652	PR	81.7	12	KS	1	139	PR	29.2	505	PR	0.9	44	SCNC	1.5	180	PR	3.5	153	SCNC	1.9	253	SCNC	2	355	SCNC	26.3	433	PR	12.1	12	DC	5.4	282	PR
97.5	653	PR	100	13	KS	1	140	PR	31.2	506	PR	1	45	SCNC	1.5	181	PR	3.5	154	SCNC	1.9	254	SCNC	2	356	SCNC	26.5	434	PR	20.2	13	DC	5.5	283	PR
97.8	654	PR	0	1	PR	1	141	PR	33.5	507	PR	1	46	SCNC	1.5	182	PR	3.5	155	SCNC	1.9	255	SCNC	2	357	SCNC	26.7	435	PR	41.7	14	DC	5.5	284	PR
98.2	655	PR	0	2	PR	1	142	PR	35.9	508	PR	1	47	SCNC	1.6	183	PR	3.6	156	SCNC	1.9	256	SCNC	2	358	SCNC	27	436	PR	75.2	15	DC	5.5	285	PR
98.6	656	PR	0	3	PR	1	143	PR	38.6	509	PR	1	48	SCNC	1.6	184	PR	3.6	157	SCNC	1.9	257	SCNC	2	359	SCNC	27.4	437	PR	100	16	DC	5.6	286	PR
98.8	657	PR	0.1	4	PR	1	144	PR	41.3	510	PR	1.1	49	SCNC	1.6	185	PR	3.6	158	SCNC	1.9	258	SCNC	2	360	SCNC	27.6	438	PR	0.2	1	KS	5.6	287	PR
98.9	658	PR	0.1	5	PR	1	145	PR	44.6	511	PR	1.1	50	SCNC	1.6	186	PR	3.6	159	SCNC	1.9	259	SCNC	2	361	SCNC	27.7	439	PR	0.7	2	KS	5.7	288	PR
98.9	659	PR	0.1	6	PR	1.1	146	PR	48.1	512	PR	1.1	51	SCNC	1.6	187	PR	3.6	160	SCNC	1.9	260	SCNC	2	362	SCNC	28	440	PR	4.7	3	KS	5.8	289	PR
99.1	660	PR	0.1	7	PR	1.1	147	PR	52.1	513	PR	1.1	52	SCNC	1.7	188	PR	3.7	161	SCNC	1.9	261	SCNC	2	363	SCNC	28.2	441	PR	67.9	4	KS	5.9	290	PR
99.2	661	PR	0.1	8	PR	1.1	148	PR	56.3	514	PR	1.1	53	SCNC	1.7	189	PR	3.7	162	SCNC	1.9	262	SCNC	2	364	SCNC	28.4	442	PR	100	5	KS	5.9	291	PR
99.2	662	PR	0.1	9	PR	1.1	149	PR	64.2	515	PR	1.2	54	SCNC	1.7	190	PR	3.7	163	SCNC	1.9	263	SCNC	2	365	SCNC	28.6	443	PR	0	1	PR	6	292	PR
99.3	663	PR	0.1	10	PR	1.1	150	PR	70.1	516	PR	1.2	55	SCNC	1.8	191	PR	3.7	164	SCNC	2.3	264	SCNC	2	366	SCNC	28.9	444	PR	0	2	PR	6	293	PR
99.4	664	PR	0.1	11	PR	1.1	151	PR	74.6	517	PR	1.2	56	SCNC	1.8	192	PR	3.8	165	SCNC	2.3	265	SCNC	2	367	SCNC	29.2	445	PR	0.1	3	PR	6.1	294	PR
99.5	665	PR	0.2	12	PR	1.2	152	PR	78.6	518	PR	1.2	57	SCNC	1.8	193	PR	3.8	166	SCNC	2.3	266	SCNC	2	368	SCNC	29.5	446	PR	0.1	4	PR	6.1	295	PR
99.6	666	PR	0.2	13	PR	1.2	153	PR	84.6	519	PR	1.2	58	SCNC	1.8	194	PR	3.8	167	SCNC	2.3	267	SCNC	2.1	369	SCNC	29.8	447	PR	0.1	5	PR	6.2	296	PR
99.7	667	PR	0.2	14	PR	1.2	154	PR	94.5	520	PR	1.3	59	SCNC	1.9	195	PR	3.8	168	SCNC	2.3	268	SCNC	2.1	370	SCNC	30	448	PR	0.1	6	PR	6.3	297	PR
99.8	668	PR	0.2	15	PR	1.2	155	PR	100	521	PR	1.3	60	SCNC	1.9	196	PR	3.9	169	SCNC	2.3	269	SCNC	2.1	371	SCNC	30.3	449	PR	0.1	7	PR	6.3	298	PR
99.8	669	PR	0.2	16	PR	1.2	156	PR	0	1	SCNC	1.3	61	SCNC	1.9	197	PR	3.9	170	SCNC	2.3	270	SCNC	2.1	372	SCNC	30.6	450	PR	0.2	8	PR	6.4	299	PR
99.8	670	PR	0.2	17	PR	1.3	157	PR	0	2	SCNC	1.3	62	SCNC	1.9	198	PR	3.9	171	SCNC	2.3	271	SCNC	2.1	373	SCNC	31	451	PR	0.2	9	PR	6.5	300	PR
99.8	671	PR	0.2	18	PR	1.3	158	PR	0	3	SCNC	1.4	63	SCNC	1.9	199	PR	3.9	172	SCNC	2.3	272	SCNC	2.1	374	SCNC	31.3	452	PR	0.2	10	PR	6.6	301	PR
99.9	672	PR	0.3	19	PR	1.3	159	PR	0	4	SCNC	1.4	64	SCNC	2	200	PR	3.9	173	SCNC	2.3	273	SCNC	2.1	375	SCNC	31.5	453	PR	0.2	11	PR	6.7	302	PR
100	673	PR	0.3	20	PR	1.3	160	PR	0	5	SCNC	1.4	65	SCNC	2	201	PR	4	174	SCNC	2.3	274	SCNC	2.1	376	SCNC	31.6	454	PR	0.2	12	PR	6.8	303	PR
100	674	PR	0.3	21	PR	1.3	161	PR	0	6	SCNC	1.4	66	SCNC	2.1	202	PR	4	175	SCNC	2.3	275	SCNC	2.1	377	SCNC	31.8	455	PR	0.3	13	PR	6.8	304	PR
0	1	SCNC	0.3	22	PR	1.3	162	PR	0	7	SCNC	1.4	67	SCNC	2.1	203	PR	4	176	SCNC	2.3	276	SCNC	2.1	378	SCNC	32	456	PR	0.3	14	PR	6.9	305	PR
0	2	SCNC	0.3	23	PR	1.4	163	PR	0	8	SCNC	1.5	68	SCNC	2.1	204	PR	4	177	SCNC	2.3	277	SCNC	2.1	379	SCNC	32.4	457	PR	0.3	15	PR	7	306	PR
0.1	3	SCNC	0.3	24	PR	1.4	164	PR	0	9	SCNC	1.5	69	SCNC	2.2	205	PR	4.1	178	SCNC	2.3	278	SCNC	2.1	380	SCNC	32.8	458	PR	0.3	16	PR	7.1	307	PR
[truncated: 18,169 more rows]
